# Supplementary material for: The impact of socioeconomic status on emergency department outcome in a low-income country setting: A registry-based analysis
Source: PLoS One. 2019 Oct 16;14(10):e0223045. doi: 10.1371/journal.pone.0223045 (PMC6795438; doi:10.1371/journal.pone.0223045)
Supplement: S1 File — (XLS) [file pone.0223045.s001.xls]

## Sheet: Total
CaseID	M	F	Unknown Sex	Age	Profession	NPB Score	ACS Occ Code	CCS Category	CCS Code	Dispo	Discharge	Admit	AMA	Eloped	Deceased	DOA	Transfer
1	1	0	0	25	Chômeur	unemployed	unemployed	Other and unspecified gastrointestinal disorders	9.12.3	Décharge	0	0	1	0	0	0	0
2	0	0	1	12	?	?	?	Superficial injury; contusion	16.8	Exeat	1	0	0	0	0	0	0
3	1	0	0	65	Cultivateur	42	205	retention of urine	10.1.8.2	Tr (Uro)	0	1	0	0	0	0	0
4	1	0	0	72	?	?	?	Coronary atherosclerosis and other heart disease	7.2.4	Tr (Cardio)	0	1	0	0	0	0	0
5	0	1	0	62	Ménagère	6	4230	Chronic ulcer of leg or foot	12.3.2	Tr (Bloc)	0	1	0	0	0	0	0
6	1	0	0	25	Menuisier	28	6230	Fracture of upper limb	16.2.3	Tr (Traumato)	0	1	0	0	0	0	0
7	1	0	0	51	Commerçant	20	4950	Fluid and electrolyte disorders	3.8	Tr (MI)	0	1	0	0	0	0	0
8	1	0	0	38	Menuisier	28	6230	Open wounds of extremities	16.6.2	Exeat	1	0	0	0	0	0	0
9	1	0	0	34	Chômeur	unemployed	unemployed	Hemorrhage of gastrointestinal tract	9.10.7	Tr (HGE)	0	1	0	0	0	0	0
10	1	0	0	27	Commerçant	20	4950	Superficial injury; contusion	16.8	Exeat	1	0	0	0	0	0	0
11	1	0	0	63	Vendeur	20	4950	Other fracture of upper limb	16.2.3.3	Tr (Traumato)	0	1	0	0	0	0	0
12	1	0	0	26	Etudiant	student	student	Superficial injury; contusion	16.8	Exeat	1	0	0	0	0	0	0
13	1	0	0	65	Enseignant retraité	retired	retired	Intracranial hemorrhage	7.3.1.1	Décès	0	0	0	0	1	0	0
14	1	0	0	23	?	?	?	Injury and poisoning	16	Tr (Traumato)	0	1	0	0	0	0	0
15	1	0	0	44	Cultivateur	42	205	Open wounds of head; neck; and trunk	16.6.1	Décharge	0	0	1	0	0	0	0
16	0	0	1	12	Ecolier	student	student	Open wounds of head; neck; and trunk	16.6.1	Exeat	1	0	0	0	0	0	0
17	1	0	0	38	?	?	?	Fracture of vertebral column without mention of spinal cord injury	16.2.5.1	Tr (Traumato)	0	1	0	0	0	0	0
18	1	0	0	0.666667	?	?	?	Intestinal infection	9.1	Tr (Péd)	0	1	0	0	0	0	0
19	1	0	0	34	Bijoutier	36	8750	Joint disorders and dislocations; trauma-related	16.1	Exeat	1	0	0	0	0	0	0
20	0	1	0	16	Ecolier	student	student	Intracranial injury	16.4	Exeat	1	0	0	0	0	0	0
21	1	0	0	58	?	?	?	Retention of urine	10.1.8.2	TR (URO)	0	1	0	0	0	0	0
22	1	0	0	48	?	?	?	Intracranial injury	16.4	Tr (Traumato)	0	1	0	0	0	0	0
23	1	0	0	48	Chef pompier	82	3720			CED	0	0	0	0	0	1	0
24	1	0	0	50	?	?	?	Pulmonary heart disease	7.2.6	Tr (Cardio)	0	1	0	0	0	0	0
25	1	0	0	71	Maçon	20	6220	Pneumonia (except that caused by TB or STD)	8.1.1	Décharge	0	0	1	0	0	0	0
26	0	0	1	14	Ecolier	student	student	Superficial injury; contusion	16.8	Exeat	1	0	0	0	0	0	0
27	1	0	0	43	Commerçant	20	4950	Open wounds of extremities	16.6.2	Tr (Traumato)	0	1	0	0	0	0	0
28	1	0	0	25	Cultivateur	42	205	Peritonitis and intestinal abscess	9.6.6	Tr (Bloc)	0	1	0	0	0	0	0
29	0	1	0	53	Ménagère	6	4230	Diseases of the respiratory system	8	Tr (MI)	0	1	0	0	0	0	0
30	1	0	0	25	Ouvrier	20	6260	poisoning by nonmedicinal substances	16.11.3	Exeat	1	0	0	0	0	0	0
31	0	1	0	70	?	?	?	Congestive heart failure	7.2.11.1	Décès	0	0	0	0	1	0	0
32	0	1	0	55	Vendeur	20	4950	intestinal infection	9.1	Décharge	0	0	1	0	0	0	0
33	0	1	0	32	Vendeur	20	4950	Meningitis (except that caused by TB or STD)	6.1.1	Tr (MI)	0	1	0	0	0	0	0
34	0	1	0	32	Commerçant	20	4950	Superficial injury; contusion	16.8	Tr (Traumato)	0	1	0	0	0	0	0
35	1	0	0	44	Chauffeur	31	9140	Other infections; including parasitic	1.4	Tr (MI)	0	1	0	0	0	0	0
36	1	0	0	23	Etudiant	student	student	Superficial injury; contusion	16.8	Exeat	1	0	0	0	0	0	0
37	1	0	0	45	Chömeur	unemployed	unemployed	Intracranial injury	16.4	Tr (ORLO)	0	1	0	0	0	0	0
38	1	0	0	64	Chef mécanicien	62	7000			CED	0	0	0	0	0	1	0
39	1	0	0	56	Cultivateur	42	205	Paralysis	6.3	Tr (Traumato)	0	1	0	0	0	0	0
40	1	0	0	31	Pêcheur	23	6100	Tuberculosis	1.1.1	Tr (2P)	0	1	0	0	0	0	0
41	1	0	0	46	Chauffeur	31	9140	Superficial injury; contusion	16.8	Exeat	1	0	0	0	0	0	0
42	1	0	0	41	Commerçant	20	4950	abdominal pain	17.1.7	Tr (HGE)	0	1	0	0	0	0	0
43	1	0	0	42	Marin	46	9300	Open wounds of head; neck; and trunk	16.6.1	Exeat	1	0	0	0	0	0	0
44	1	0	0	19	Etudiant	student	student	Appendicitis and other appendiceal conditions	9.6.1	Tr (Viscéral)	0	1	0	0	0	0	0
45	1	0	0	52	Pâtissier	40	4000	Heart failure	7.2.11.2	Tr (Cardio)	0	1	0	0	0	0	0
46	1	0	0	61	Gérant	84	20	Alcohol-related disorders	5.11	Exeat	1	0	0	0	0	0	0
47	1	0	0	?	Marin	46	9300			CED	0	0	0	0	0	1	0
48	1	0	0	44	Chauffeur	31	9140	Infectious and parasitic diseases	1	Tr (MI)	0	1	0	0	0	0	0
49	1	0	0	40	Chauffeur	31	9140	DIseases of male genital organs	10.2	Tr (Traumato)	0	1	0	0	0	0	0
50	1	0	0	65	Retraité	retired	retired	Chronic ulcer of leg or foot	12.3.2	Tr (Bloc)	0	1	0	0	0	0	0
51	1	0	0	66	Cultivateur	42	205	Intracranial hemorrhage	7.3.1.1	Décès	0	0	0	0	1	0	0
52	0	1	0	17	Ecolier	student	student	Poisoning by other medications and drugs	16.11.2	Exeat	1	0	0	0	0	0	0
53	0	1	0	31	Collecteur	7	6050	Open wounds of extremities	16.6.2	Exeat	1	0	0	0	0	0	0
54	0	1	0	29	?	?	?	Somatoform disorders	5.15.7	Exeat	1	0	0	0	0	0	0
55	0	1	0	15	Etudiant	student	student	Somatoform disorders	5.15.7	Tr (Neuro-Psy)	0	1	0	0	0	0	0
56	0	1	0	24	Commerçant	20	4950	injury and poisoning	16	Exeat	1	0	0	0	0	0	0
57	0	1	0	18	Etudiant	student	student	Superficial injury; contusion	16.8	Tr (Traumato)	0	1	0	0	0	0	0
58	0	1	0	28	?	?	?	Open wounds of head; neck; and trunk	16.6.1	Exeat	1	0	0	0	0	0	0
59	1	0	0	10	Ecolier	student	student	Open wounds of extremities	16.6.2	Exeat	1	0	0	0	0	0	0
60	1	0	0	64	Marin retraité	retired	retired	Other gram negative septicemia	1.1.2.4	Tr (MI)	0	1	0	0	0	0	0
61	0	0	0	6	Ecolier	student	student	Open wounds of head; neck; and trunk	16.6.1	Exeat	1	0	0	0	0	0	0
62	0	0	1	3	?	?	?	Open wounds of extremities	16.6.2	Tr (Traumato)	0	1	0	0	0	0	0
63	0	0	1	14	Ecolier	student	student	Joint disorders and dislocations; trauma-related	16.1	Décharge	0	0	1	0	0	0	0
64	1	0	0	22	Commerçant	20	4950	Alcohol-related disorders	5.11	Exeat	1	0	0	0	0	0	0
65	1	0	0	21	Commerçant	20	4950	Superficial injury; contusion	16.8	Tr (Traumato)	0	1	0	0	0	0	0
66	1	0	0	68	Directeur de Douanes	68	160	Poisoning by other medications and drugs	16.11.2	Exeat	1	0	0	0	0	0	0
67	1	0	0	43	Gérant Sté Arc-en-ciel	84	20	Burns	16.9	Exeat	1	0	0	0	0	0	0
68	0	1	0	25	?	?	?	Unspecified gastritis and gastroduodenitis	9.4.3.3	Tr (HGE)	0	1	0	0	0	0	0
69	0	0	1	1	?	?	?	Superficial injury; contusion	16.8	Exeat	1	0	0	0	0	0	0
70	1	0	0	85	Navigateur	61	9310	Hypertension with complications and secondary hypertension	7.1.2	Décès	0	0	0	0	1	0	0
71	0	1	0	18	Ménagère	6	4230	Superficial injury; contusion	16.8	Exeat	1	0	0	0	0	0	0
72	1	0	0	20	Gardien	39	3930	Poisoning by nonmedicinal substances	16.11.3	Exeat	1	0	0	0	0	0	0
73	1	0	0	33	Plongeur	1	4140	injury and poisoning	16	Tr (Traumato)	0	1	0	0	0	0	0
74	1	0	0	44	Cultivateur	42	205	Open wounds of extremities	16.6.2	Exeat	1	0	0	0	0	0	0
75	0	1	0	24	?	?	?	Menstrual disorders	10.3.5	Tr (Gynéco)	0	1	0	0	0	0	0
76	0	1	0	39	Vendeuse	20	4950	Poisoning	16.11	Exeat	1	0	0	0	0	0	0
77	1	0	0	17	Etudiant	student	student	Injury and poisoning	16	Exeat	1	0	0	0	0	0	0
78	1	0	0	17	Maçon	20	6220	Open wounds of head; neck; and trunk	16.6.1	Exeat	1	0	0	0	0	0	0
79	1	0	0	37	Cultivateur	42	205	Tuberculosis	1.1.1	Décès	0	0	0	0	1	0	0
80	0	1	0	16	Ménagère	6	4230	poisoning by nonmedicinal substances	16.11.3	Exeat	1	0	0	0	0	0	0
81	0	1	0	21	Ménagère	6	4230	Inflammatory diseases of female pelvic organs	10.3.2	Tr (Gynéco)	0	1	0	0	0	0	0
82	1	0	0	45	Mécanicien	36	7200	Superficial injury; contusion	16.8	Exeat	1	0	0	0	0	0	0
83	1	0	0	80	?	?	?	Injury and poisoning	16	Exeat	1	0	0	0	0	0	0
84	1	0	0	22	?	?	?			CED	0	0	0	0	0	1	0
85	1	0	0	48	Marchand	20	4950	injury and poisoning	16	Tr (Traumato)	0	1	0	0	0	0	0
86	1	0	0	68	Cultivateur	42	205	Hemorrhage of gastrointestinal tract	9.10.7	Décharge	0	0	1	0	0	0	0
87	1	0	0	51	Avocat	99	2100	Occlusion of cerebral arteries	7.3.1.2	Evasan	0	0	0	0	0	0	1
88	1	0	0	58	Gardien	39	3930	Infectious and parasitic diseases	1	Décharge	0	0	1	0	0	0	0
89	0	1	0	57	Ménagère	6	4230	Coronary atherosclerosis and other heart disease	7.2.4	Tr (Cardio)	0	1	0	0	0	0	0
90	0	0	1	6	Ecolier	student	student	Open wounds of head; neck; and trunk	16.6.1	Exeat	1	0	0	0	0	0	0
91	0	1	0	80	Ménagère	6	4230	Cancer of uterus	2.6.1	Décès	0	0	0	0	1	0	0
92	0	1	0	29	Guichetier	42	5160	Meningitis (except that caused by TB or STD)	6.1.1	Décès	0	0	0	0	1	0	0
93	1	0	0	35	Tireur de pousse-pousse	15	9150	Coma; stupor; and brain damage	6.6	Décès	0	0	0	0	1	0	0
94	0	0	1	3	?	?	?	Open wounds of head; neck; and trunk	16.6.1	Exeat	1	0	0	0	0	0	0
95	0	0	1	14	Ecolier	student	student	Lower gastrointestinal disorders	9.6	Exeat	1	0	0	0	0	0	0
96	1	0	0	58	Gardien	39	3930	Inguinal hernia with obstruction or gangrene	9.5.1.1	Tr (Bloc)	0	1	0	0	0	0	0
97	1	0	0	45	Agent de sécurité	39	3930	abdominal pain	17.1.7	Décharge	0	0	1	0	0	0	0
98	1	0	0	45	Commerçant	20	4950	Open wounds of head; neck; and trunk	16.6.1	Exeat	1	0	0	0	0	0	0
99	1	0	0	43	Vendeur	20	4950	Cardiac dysrhythmias	7.2.9	Décharge	0	0	1	0	0	0	0
100	1	0	0	48	Chauffeur	31	9140	Calculus of urinary tract	10.1.5	Décharge	0	0	1	0	0	0	0
101	1	0	0	56	Retraité	retired	retired			CED	0	0	0	0	0	1	0
102	1	0	0	42	?	?	?	convulsions	6.4.2	Tr (MI)	0	1	0	0	0	0	0
103	0	1	0	20	Etudiant	student	student	Sexually transmitted infections (not HIV or hepatitis)	1.1.3	Tr (Gynéco)	0	1	0	0	0	0	0
104	1	0	0	38	Marin	46	9300	Superficial injury; contusion	16.8	Exeat	1	0	0	0	0	0	0
105	0	1	0	37	Ménagère	6	4230	Paralysis	6.3	Evasan (Tanà)	0	0	0	0	0	0	1
106	0	1	0	70	Animatrice rurale	41	2760	Occlusion of cerebral arteries	7.3.1.2	Tr (Cardio)	0	1	0	0	0	0	0
107	0	1	0	35	Commerçant	20	4950	Open wounds of head; neck; and trunk	16.6.1	Tr (ORLO)	0	1	0	0	0	0	0
108	1	0	0	60	Retraité	retired	retired	retention of urine	10.1.8.2	Tr (Uro)	0	1	0	0	0	0	0
109	0	0	1	8	Ecolier	student	student	Fracture of humerus	16.2.3.1	Tr (Bloc)	0	1	0	0	0	0	0
110	0	1	0	21	?	?	?	Somatoform disorders	5.15.7	Exeat	1	0	0	0	0	0	0
111	0	1	0	17	Ecolier	student	student	Appendicitis and other appendiceal conditions	9.6.1	Tr (Viscérale)	0	1	0	0	0	0	0
112	1	0	0	68	Douanier	52	5500	Intestinal obstruction without hernia	9.6.3	Tr (Pédiatrie)	0	1	0	0	0	0	0
113	1	0	0	73	?	?	?	Epilepsy	6.4.1	Tr (Neuro-psy)	0	1	0	0	0	0	0
114	1	0	0	51	?	?	?			CED	0	0	0	0	0	1	0
115	1	0	0	36	Chauffeur	31	9140	Fracture of radius and ulna	16.2.3.2	Tr (Traumato)	0	1	0	0	0	0	0
116	1	0	0	62	Cultivateur	42	205	Gastrointestinal hemorrhage	9.10.0	Tr (HGE)	0	1	0	0	0	0	0
117	0	1	0	29	Commerçant	20	4950	Superficial injury; contusion	16.8	Exeat	1	0	0	0	0	0	0
118	1	0	0	37	Menuisier	28	6230	Open wounds of extremities	16.6.2	Exeat	1	0	0	0	0	0	0
119	1	0	0	44	Cultivateur	42	205	Inguinal hernia with obstruction or gangrene	9.5.1.1	Tr (Bloc)	0	1	0	0	0	0	0
120	0	0	1	6	Ecolier	student	student	Intracranial injury	16.4	Exeat	1	0	0	0	0	0	0
121	1	0	0	26	Enseignant	84	2310	Superficial injury; contusion	16.8	Tr (Traumato)	0	1	0	0	0	0	0
122	1	0	0	30	Cultivateur	42	205	Acute bronchitis	8.1.4	Tr (2P)	0	1	0	0	0	0	0
123	0	1	0	19	Etudiant	student	student	Appendicitis and other appendiceal conditions	9.6.1	Tr (Viscéral)	0	1	0	0	0	0	0
124	1	0	0	51	?	?	?	Acute cerebrovascular disease	7.3.1	Tr (Neuro-Psy)	0	1	0	0	0	0	0
125	1	0	0	60	Militaire	military	military	Acute myocardial infarction	7.2.3	Tr (Cardio)	0	1	0	0	0	0	0
126	1	0	0	33	?	?	?	Peritonitis and intestinal abscess	9.6.6	Tr (Bloc)	0	1	0	0	0	0	0
127	1	0	0	27	Superviseur	57	4700	Superficial injury; contusion	16.8	Exeat	1	0	0	0	0	0	0
128	0	1	0	41	Enseignant	84	2310	Convulsions	6.4.2	Exeat	1	0	0	0	0	0	0
129	1	0	0	31	Gardien	39	3930	Superficial injury; contusion	16.8	Exeat	1	0	0	0	0	0	0
130	1	0	0	22	Etudiant	student	student	convulsions	6.4.2	Tr (MI)	0	1	0	0	0	0	0
131	0	0	1	12	Ecolier	student	student	Fracture of radius and ulna	16.2.3.2	Tr (Traumato)	0	1	0	0	0	0	0
132	1	0	0	37	Chauffeur	31	9140	Open wounds of extremities	16.6.2	Exeat	1	0	0	0	0	0	0
133	1	0	0	28	Policier	78	3850	Open wounds of head; neck; and trunk	16.6.1	Exeat	1	0	0	0	0	0	0
134	1	0	0	24	Agent de sécurité	39	3930	Injury and poisoning	16	Tr (ORLO)	0	1	0	0	0	0	0
135	0	0	1	0.833333	?	?	?	Inguinal hernia	9.5.1	Tr (Traumato)	0	1	0	0	0	0	0
136	1	0	0	19	Ecolier	student	student	Poisoning	16.11	Exeat	1	0	0	0	0	0	0
137	1	0	0	43	Agent de sécurité	39	3930	Hypertension	7.1	Tr (Cardio)	0	1	0	0	0	0	0
138	1	0	0	33	Médecin	100	3060	Asthma	8.3	Exeat	1	0	0	0	0	0	0
139	1	0	0	70	Cultivateur	42	205	cancer of stomach	2.2.2	Tr (HGE)	0	1	0	0	0	0	0
140	0	0	1	1.08333	?	?	?	Intracranial injury	16.4	Exeat	1	0	0	0	0	0	0
141	1	0	0	21	Charpentier	28	6230	Open wounds of head; neck; and trunk	16.6.1	Tr (Bloc)	0	1	0	0	0	0	0
142	1	0	0	32	Agent AQUALMA	34	4760	injury and poisoning	16	Exeat	1	0	0	0	0	0	0
143	1	0	0	59	Agent AQUALMA	34	4760	injury and poisoning	16	Tr (Traumato)	0	1	0	0	0	0	0
144	0	1	0	35	?	?	?	Injury and poisoning	16	Tr (ORLO)	0	1	0	0	0	0	0
145	1	0	0	39	Marin	46	9300	Fracture of upper limb	16.2.3	Evadé	0	0	0	1	0	0	0
146	1	0	0	60	Cultivateur	42	205	Cirrhosis of liver without mention of alcohol	9.8.2.1	Tr (HGE)	0	1	0	0	0	0	0
147	0	1	0	16	?	?	?	Somatoform disorders	5.15.7	Décharge	0	0	1	0	0	0	0
148	1	0	0	24	Marin	46	9300	Superficial injury; contusion	16.8	Exeat	1	0	0	0	0	0	0
149	0	0	1	1.25	?	?	?	Open wounds of extremities	16.6.2	Exeat	1	0	0	0	0	0	0
150	1	0	0	23	Etudiant	student	student	Skull and face fractures	16.2.2	Exeat	1	0	0	0	0	0	0
151	1	0	0	68	Sécurité routière retraitée	retired	retired	Pneumonia (except that caused by TB or STD)	8.1.1	Tr (MI)	0	1	0	0	0	0	0
152	1	0	0	33	Docker	32	9750	Superficial injury; contusion	16.8	Exeat	1	0	0	0	0	0	0
153	1	0	0	23	Commerçant	20	4950	injury and poisoning	16	Tr (Traumato)	0	1	0	0	0	0	0
154	1	0	0	32	Pêcheur	23	6100	Intracranial injury	16.4	Tr (Traumato)	0	1	0	0	0	0	0
155	1	0	0	17	Etudiant	student	student	Alcohol-related disorders	5.11	Exeat	1	0	0	0	0	0	0
156	0	1	0	17	Etudiant	student	student	Mental Illness	5	Exeat	1	0	0	0	0	0	0
157	0	1	0	16	Etudiant	student	student	Somatoform disorders	5.15.7	Exeat	1	0	0	0	0	0	0
158	0	1	0	40	Greffier	23	4740	Burns	16.9	Exeat	1	0	0	0	0	0	0
159	1	0	0	23	Etudiant	student	student	Superficial injury; contusion	16.8	Exeat	1	0	0	0	0	0	0
160	1	0	0	23	Agent de sécurité	39	3930	Open wounds of head; neck; and trunk	16.6.1	Exeat	1	0	0	0	0	0	0
161	1	0	0	27	Agent de sécurité	39	3930	Gastric ulcer	9.4.2.1	Exeat	1	0	0	0	0	0	0
162	1	0	0	23	Etudiant	student	student	Superficial injury; contusion	16.8	Exeat	1	0	0	0	0	0	0
163	1	0	0	19	Receveur	32	9120	Intracranial injury	16.4	Tr (ORLO)	0	1	0	0	0	0	0
164	0	1	0	20	Etudiant	student	student	Superficial injury; contusion	16.8	Exeat	1	0	0	0	0	0	0
165	1	0	0	27	Chauffeur	31	9140	Calculus of urinary tract	10.1.5	Exeat	1	0	0	0	0	0	0
166	1	0	0	41	Chauffeur	31	9140	injury and poisoning	16	Tr (Bloc)	0	1	0	0	0	0	0
167	1	0	0	40	Enseignant	84	2310	Pneumonia (except that caused by TB or STD)	8.1.1	Tr (2P)	0	1	0	0	0	0	0
168	0	1	0	15	Ecolier	student	student	intestinal infection	9.1	Exeat	1	0	0	0	0	0	0
169	0	0	1	1.16667	?	?	?	Open wounds of extremities	16.6.2	Tr (Traumato)	0	1	0	0	0	0	0
170	1	0	0	36	Journaliste	75	2810	Superficial injury; contusion	16.8	Tr (Traumato)	0	1	0	0	0	0	0
171	1	0	0	17	Etudiant	student	student	Intracranial injury	16.4	Exeat	1	0	0	0	0	0	0
172	0	0	1	1.66667	?	?	?	Hemorrhage or hematoma complicating a procedure	16.10.2.5	Exeat	1	0	0	0	0	0	0
173	0	0	1	10	Ecolier	student	student	Superficial injury; contusion	16.8	Exeat	1	0	0	0	0	0	0
174	0	1	0	34	Ménagère	6	4230	Alcohol-related disorders	5.11	Exeat	1	0	0	0	0	0	0
175	0	0	1	6	Ecolier	student	student	Open wounds of head; neck; and trunk	16.6.1	Exeat	1	0	0	0	0	0	0
176	0	0	1	4	?	?	?	Superficial injury; contusion	16.8	Exeat	1	0	0	0	0	0	0
177	1	0	0	18	Etudiant	student	student	Shock	17.1.5	Tr (MI)	0	1	0	0	0	0	0
178	1	0	0	20	Etudiant	student	student	Intracranial injury	16.4	Exeat	1	0	0	0	0	0	0
179	1	0	0	61	?	?	?	?	?	?	?	?	?	?	?	?	?
180	1	0	0	25	Homme de ménage	6	4230	Hemorrhage of gastrointestinal tract	9.10.7	Tr (HGE)	0	1	0	0	0	0	0
181	0	1	0	35	Ménagère	6	4230	Cancer of bronchus; lung	2.3	Evasan Tanà	0	0	0	0	0	0	1
182	1	0	0	41	?	?	?			CED	0	0	0	0	0	1	0
183	0	1	0	49	Ménagère	6	4230	Superficial injury; contusion	16.8	Exeat	1	0	0	0	0	0	0
184	1	0	0	52	Transporteur d'eau	38	9130	Convulsions	6.4.2	Tr (Neuro-Psy)	0	1	0	0	0	0	0
185	0	0	1	10	Ecolier	student	student	Intracranial injury	16.4	Exeat	1	0	0	0	0	0	0
186	1	0	0	57	Cultivateur	42	205	Fracture of radius and ulna	16.2.3.2	Exeat	1	0	0	0	0	0	0
187	1	0	0	22	Maçon	20	6220	Delirium dementia and amnestic and other cognitive disorders	5.4	Exeat	1	0	0	0	0	0	0
188	1	0	0	29	Enseignant	84	2310	Open wounds of extremities	16.6.2	Exeat	1	0	0	0	0	0	0
189	1	0	0	37	Docker	32	9750	Superficial injury; contusion	16.8	Exeat	1	0	0	0	0	0	0
190	1	0	0	31	?	?	?	?	?	?	?	?	?	?	?	?	?
191	1	0	0	23	Boucher	19	7810	Superficial injury; contusion	16.8	Exeat	1	0	0	0	0	0	0
192	0	0	1	14	Ecolier	student	student	Other fractures	16.2.5	Tr (Traumato)	0	1	0	0	0	0	0
193	0	1	0	18	Ménagère	6	4230	Open wounds of extremities	16.6.2	Exeat	1	0	0	0	0	0	0
194	1	0	0	26	Superviseur de crédit	68	5000	Superficial injury; contusion	16.8	Exeat	1	0	0	0	0	0	0
195	1	0	0	22	?	?	?	Calculus of kidney	10.1.5.1	Tr (Uro)	0	1	0	0	0	0	0
196	1	0	0	18	Recever Bus	32	9120	Superficial injury; contusion	16.8	Exeat	1	0	0	0	0	0	0
197	1	0	0	43	Technicien	40	7630	Acute myocardial infarction	7.2.3	Tr (Cardio)	0	1	0	0	0	0	0
198	1	0	0	30	Informaticien	90	1010	Other upper respiratory infections	8.1.5	Tr (ORLO)	0	1	0	0	0	0	0
199	1	0	0	25	Vendeur	20	4950	Other gram negative septicemia	1.1.2.4	Tr (MI)	0	1	0	0	0	0	0
200	0	0	1	14	Ecolier	student	student	Anemia	4.1	Tr (Péd)	0	1	0	0	0	0	0
201	1	0	0	40	Menuisier	28	6230	injury and poisoning	16	Tr (Traumato)	0	1	0	0	0	0	0
202	1	0	0	23	Maçon	20	6220	Other gram negative septicemia	1.1.2.4	Tr (MI)	0	1	0	0	0	0	0
203	1	0	0	20	Etudiant	student	student	Superficial injury; contusion	16.8	Exeat	1	0	0	0	0	0	0
204	0	1	0	18	Etudiant	student	student	Other and unspecified metabolic; nutritional; and endocrine disorders	3.11.3	Exeat	1	0	0	0	0	0	0
205	1	0	0	28	Pénitencier	57	3800	Endocrine; nutritional; and metabolic diseases and immunity disorders	3	Tr (MI)	0	1	0	0	0	0	0
206	1	0	0	40	?	?	?	Burns	16.9	Evadé	0	0	0	1	0	0	0
207	0	0	1	14	Ecolier	student	student	Fracture of tibia and fibula	16.2.4.1	Décharge	0	0	1	0	0	0	0
208	1	0	0	56	Agent MinAgriculture retraité	retired	retired	Diabetes with ketoacidosis or uncontrolled diabetes	3.3.1	Tr (MI)	0	1	0	0	0	0	0
209	1	0	0	62	Retraité	retired	retired	retention of urine	10.1.8.2	Tr (Uro)	0	1	0	0	0	0	0
210	1	0	0	46	Douanier	52	5500	Fracture of radius and ulna	16.2.3.2	Tr (Bloc)	0	1	0	0	0	0	0
211	1	0	0	39	Pêcheur	23	6100	Alcohol-related disorders	5.11	Tr (MI)	0	1	0	0	0	0	0
212	1	0	0	19	?	?	?	Superficial injury; contusion	16.8	Exeat	1	0	0	0	0	0	0
213	1	0	0	31	Chef cuisinier	40	4000	Open wounds of extremities	16.6.2	Tr (Traumato)	0	1	0	0	0	0	0
214	1	0	0	25	Agent de sécurité	39	3930	Superficial injury; contusion	16.8	Exeat	1	0	0	0	0	0	0
215	1	0	0	19	Etudiant	student	student	poisoning by nonmedicinal substances	16.11.3	Exeat	1	0	0	0	0	0	0
216	0	1	0	18	Etudiant	student	student	Other infections; including parasitic	1.4	Tr (Neuro-Psy)	0	1	0	0	0	0	0
217	1	0	0	75	?	?	?	Calculus of urinary tract	10.1.5	Tr (URO)	0	1	0	0	0	0	0
218	0	1	0	20	Vendeur	20	4950	Superficial injury; contusion	16.8	Exeat	1	0	0	0	0	0	0
219	0	0	1	9	Ecolier	student	student	Open wounds of extremities	16.6.2	Exeat	1	0	0	0	0	0	0
220	0	0	1	5	?	?	?	Superficial injury; contusion	16.8	Exeat	1	0	0	0	0	0	0
221	0	1	0	38	Ménagère	6	4230	Superficial injury; contusion	16.8	Exeat	1	0	0	0	0	0	0
222	1	0	0	29	Agent de sécurité	39	3930	Other gram negative septicemia	1.1.2.4	Exeat	1	0	0	0	0	0	0
223	1	0	0	37	Caissier	17	4720	Other asthma with acute exacerbation	8.3.2.3	Tr (2P)	0	1	0	0	0	0	0
224	0	1	0	16	Etudiant	student	student	intestinal infection	9.1	Exeat	1	0	0	0	0	0	0
225	1	0	0	?	?	?	?	Fractures	16.2	Tr (Traumato)	0	1	0	0	0	0	0
226	1	0	0	38	?	?	?			CED	0	0	0	0	0	1	0
227	0	0	1	8	Ecolier	student	student	Intracranial injury	16.4	Exeat	1	0	0	0	0	0	0
228	1	0	0	62	Surveillant	82	1310	Heart failure	7.2.11.2	Décès	0	0	0	0	1	0	0
229	1	0	0	34	Vendeur	20	4950	Superficial injury; contusion	16.8	Exeat	1	0	0	0	0	0	0
230	0	1	0	18	Ecolier	student	student			CED	0	0	0	0	0	1	0
231	0	1	0	37	?	?	?	Other infections; including parasitic	1.4	Tr (MI)	0	1	0	0	0	0	0
232	1	0	0	18	Ménagère	6	4230	Gastritis and duodenitis	9.4.3	Exeat	1	0	0	0	0	0	0
233	0	1	0	25	Etudiant	student	student	Superficial injury; contusion	16.8	Exeat	1	0	0	0	0	0	0
234	1	0	0	20	Etudiant	student	student	Mental Illness	5	Tr (Neuro-psy)	0	1	0	0	0	0	0
235	1	0	0	24	Vacancier	unemployed	unemployed			CED	0	0	0	0	0	1	0
236	1	0	0	40	Conducteur	32	9120	Superficial injury; contusion	16.8	Exeat	1	0	0	0	0	0	0
237	0	0	1	6	Ecolier	student	student	Fracture of tibia and fibula	16.2.4.1	Exeat	1	0	0	0	0	0	0
238	0	1	0	42	Détenue	prisoner	prisoner	Inflammatory diseases of female pelvic organs	10.3.2	Tr (Gynéco)	0	1	0	0	0	0	0
239	1	0	0	42	Agent de sécurité	39	3930	Open wounds of head; neck; and trunk	16.6.1	Décharge	0	0	1	0	0	0	0
240	1	0	0	21	Etudiant	student	student	Superficial injury; contusion	16.8	Exeat	1	0	0	0	0	0	0
241	1	0	0	65	?	?	?			CED	0	0	0	0	0	1	0
242	0	0	1	14	Ecolier	student	student	Appendicitis and other appendiceal conditions	9.6.1	Tr (Bloc)	0	1	0	0	0	0	0
243	1	0	0	30	Chauffeur	31	9140	calculus of kidney	10.1.5.1	Tr (Uro)	0	1	0	0	0	0	0
244	0	0	1	12	Ecolier	student	student	Appendicitis and other appendiceal conditions	9.6.1	Tr (Viscéral)	0	1	0	0	0	0	0
245	1	0	0	18	Ecolier	student	student	Intracranial injury	16.4	Tr (Traumato)	0	1	0	0	0	0	0
246	1	0	0	54	Médecin	100	3060	Alcohol-related disorders	5.11	Décharge	0	0	1	0	0	0	0
247	1	0	0	18	Ecolier	student	student	Somatoform disorders	5.15.7	Exeat	1	0	0	0	0	0	0
248	1	0	0	30	Commerçant	20	4950	chronic renal failure	10.1.3	Tr (MI)	0	1	0	0	0	0	0
249	1	0	0	33	Chauffeur	31	9140	Allergic reactions	17.1.9	Exeat	1	0	0	0	0	0	0
250	0	0	1	10	Ecolier	student	student	DIseases of male genital organs	10.2	Tr (Traumato)	0	1	0	0	0	0	0
251	1	0	0	52	Enseignant	84	2310	Other gram negative septicemia	1.1.2.4	Exeat	1	0	0	0	0	0	0
252	0	0	1	12	Ecolier	student	student	Fracture of humerus	16.2.3.1	Tr (Traumato)	0	1	0	0	0	0	0
253	0	0	1	7	Ecolier	student	student	Fracture of humerus	16.2.3.1	Tr (Traumato)	0	1	0	0	0	0	0
254	1	0	0	20	Etudiant	student	student	Intracranial injury	16.4	Exeat	1	0	0	0	0	0	0
255	1	0	0	15	Ecolier	student	student	Intracranial injury	16.4	Tr (Bloc)	0	1	0	0	0	0	0
256	1	0	0	52	Vendeur de sirop	20	4950	Poisoning	16.11	Exeat	1	0	0	0	0	0	0
257	1	0	0	32	Electricien	52	6355	Superficial injury; contusion	16.8	Exeat	1	0	0	0	0	0	0
258	0	0	1	10	Ecolier	student	student	Intracranial injury	16.4	Exeat	1	0	0	0	0	0	0
259	1	0	0	17	Ecolier	student	student	Superficial injury; contusion	16.8	Exeat	1	0	0	0	0	0	0
260	1	0	0	39	Chauffeur	31	9140	intestinal infection	9.1	Exeat	1	0	0	0	0	0	0
261	0	0	1	1.66667	?	?	?	Inguinal hernia with obstruction or gangrene	9.5.1.1	Tr (Bloc)	0	1	0	0	0	0	0
262	1	0	0	53	Enseignant	84	2310	Other gram negative septicemia	1.1.2.4	Exeat	1	0	0	0	0	0	0
263	0	1	0	43	Médecin	100	3060	Hypertension with complications and secondary hypertension	7.1.2	Tr (Cardio)	0	1	0	0	0	0	0
264	1	0	0	21	Gestionnaire	84	20	Open wounds	16.6	Exeat	1	0	0	0	0	0	0
265	1	0	0	23	Chauffeur	31	9140	Open wounds of head; neck; and trunk	16.6.1	Exeat	1	0	0	0	0	0	0
266	1	0	0	26	Pêcheur	23	6100	Injury and poisoning	16	Tr (Traumato)	0	1	0	0	0	0	0
267	0	1	0	31	Ménagère	6	4230	Postabortion complications	11.2.3	Tr (Gynéco)	0	1	0	0	0	0	0
268	1	0	0	70	Gendarme retraité	retired	retired	Poisoning	16.11	Exeat	1	0	0	0	0	0	0
269	1	0	0	35	Agent JIRAMA	34	4760	injury and poisoning	16	Tr (Traumato)	0	1	0	0	0	0	0
270	1	0	0	19	Menuisier	28	6230	Fracture of upper limb	16.2.3	Exeat	1	0	0	0	0	0	0
271	0	0	1	8	Ecolier	student	student	Skull and face fractures	16.2.2	Tr (Traumato)	0	1	0	0	0	0	0
272	1	0	0	26	Chauffeur	31	9140	Intracranial injury	16.4	Exeat	1	0	0	0	0	0	0
273	0	0	1	0.333333	?	?	?	Superficial injury; contusion	16.8	Exeat	1	0	0	0	0	0	0
274	0	0	1	0.75	?	?	?	Intestinal obstruction without hernia	9.6.3	Tr (Bloc)	0	1	0	0	0	0	0
275	1	0	0	30	Cultivateur	42	205	Joint disorders and dislocations; trauma-related	16.1	Tr (ORLO)	0	1	0	0	0	0	0
276	1	0	0	25	Personnel école du monde	78	2550	Other infections; including parasitic	1.4	Tr (MI)	0	1	0	0	0	0	0
277	1	0	0	20	Etudiant	student	student	Other miscellaneous mental conditions	5.15.9	Exeat	1	0	0	0	0	0	0
278	1	0	0	54	Musicien	44	2750	Joint disorders and dislocations; trauma-related	16.1	Exeat	1	0	0	0	0	0	0
279	0	1	0	41	Coiffeur	27	4510	cancer of uterus	2.6.1	Tr (gynéco)	0	1	0	0	0	0	0
280	1	0	0	28	Marin	46	9300	Open wounds of extremities	16.6.2	Exeat	1	0	0	0	0	0	0
281	1	0	0	49	Menuisier	28	6230	Hemorrhage of gastrointestinal tract	9.10.7	Tr (HGE)	0	1	0	0	0	0	0
282	0	0	1	12	Ecolier	student	student	Superficial injury; contusion	16.8	Exeat	1	0	0	0	0	0	0
283	1	0	0	16	Etudiant	student	student	Fracture of radius and ulna	16.2.3.2	Décharge	0	0	1	0	0	0	0
284	0	0	1	14	Ecolier	student	student	Intracranial injury	16.4	Exeat	1	0	0	0	0	0	0
285	0	1	0	15	Ecolier	student	student	Other gram negative septicemia	1.1.2.4	Tr (MI)	0	1	0	0	0	0	0
286	1	0	0	33	Boucher	19	7810	Open wounds of extremities	16.6.2	Exeat	1	0	0	0	0	0	0
287	1	0	0	27	Mahabibokely	?	?	Somatoform disorders	5.15.7	Exeat	1	0	0	0	0	0	0
288	1	0	0	16	Ecolier	student	student	poisoning by nonmedicinal substances	16.11.3	Exeat	1	0	0	0	0	0	0
289	1	0	0	61	?	?	?	Endocrine; nutritional; and metabolic diseases and immunity disorders	3	Tr (MI)	0	1	0	0	0	0	0
290	0	1	0	52	Ménagère	6	4230	Other upper respiratory disease	8.9	Décès	0	0	0	0	1	0	0
291	0	1	0	21	Ménagère	6	4230	Abdominal pain	17.1.7	Décharge	0	0	1	0	0	0	0
292	1	0	0	23	?	?	?	Cancer of head and neck	2.11.1	Exeat	1	0	0	0	0	0	0
293	1	0	0	19	Charpentier	28	6230	Superficial injury; contusion	16.8	Décharge	0	0	1	0	0	0	0
294	1	0	0	27	?	?	?	Open wounds of head; neck; and trunk	16.6.1	Décharge	0	0	1	0	0	0	0
295	0	0	1	3	?	?	?	Open wounds of extremities	16.6.2	Exeat	1	0	0	0	0	0	0
296	1	0	0	32	Bijoutier	36	8750			CED	0	0	0	0	0	1	0
297	1	0	0	44	Marin	46	9300	Burns	16.9	Tr (Traumato)	0	1	0	0	0	0	0
298	0	1	0	29	Ménagère	6	4230	Lower gastrointestinal disorders	9.6	Exeat	1	0	0	0	0	0	0
299	1	0	0	31	Chauffeur	31	9140	Superficial injury; contusion	16.8	Exeat	1	0	0	0	0	0	0
300	0	1	0	23	Ménagère	6	4230	Joint disorders and dislocations; trauma-related	16.1	Tr (Traumato)	0	1	0	0	0	0	0
301	0	1	0	24	Etudiant	student	student	Somatoform disorders	5.15.7	Exeat	1	0	0	0	0	0	0
302	0	0	1	12	Ecolier	student	student	injury and poisoning	16	Exeat	1	0	0	0	0	0	0
303	0	1	0	36	Nomade/religion	unemployed	unemployed	Open wounds	16.6	Exeat	1	0	0	0	0	0	0
304	0	1	0	23	Ménagère	6	4230	Poisoning by other medications and drugs	16.11.2	Exeat	1	0	0	0	0	0	0
305	1	0	0	31	Boulanger	11	4020	Superficial injury; contusion	16.8	Exeat	1	0	0	0	0	0	0
306	1	0	0	22	Pêcheur	23	6100	Inguinal hernia	9.5.1	Tr (Bloc)	0	1	0	0	0	0	0
307	0	1	0	19	Ménagère	6	4230	calculus of kidney	10.1.5.1	Tr (Uro)	0	1	0	0	0	0	0
308	0	1	0	19	Etudiant	student	student	Fluid and electrolyte disorders	3.8	Exeat	1	0	0	0	0	0	0
309	0	1	0	28	Ménagère	6	4230	Sexually transmitted infections (not HIV or hepatitis)	1.1.3	Tr (Gynéco)	0	1	0	0	0	0	0
310	0	1	0	27	Couturière	22	8350	Open wounds of extremities	16.6.2	Exeat	1	0	0	0	0	0	0
311	1	0	0	39	Boucher	19	7810	Abdominal pain	17.1.7	Décharge	0	0	1	0	0	0	0
312	0	0	1	5	?	?	?	Open wounds of head; neck; and trunk	16.6.1	Exeat	1	0	0	0	0	0	0
313	0	1	0	25	Ménagère	6	4230	Acute appendicitis with abscess or peritonitis	9.6.1.1	Tr (Bloc)	0	1	0	0	0	0	0
314	0	1	0	20	?	?	?	Infectious and parasitic diseases	1	Tr (MI)	0	1	0	0	0	0	0
315	0	1	0	15	Ecolier	student	student	Appendicitis and other appendiceal conditions	9.6.1	Exeat	1	0	0	0	0	0	0
316	1	0	0	12	?	?	?	Injury and poisoning	16	Tr (Traumato)	0	1	0	0	0	0	0
317	0	1	0	43	Cultivateur	42	205	Open wounds of head; neck; and trunk	16.6.1	Tr (Traumato)	0	1	0	0	0	0	0
318	1	0	0	26	Docker	32	9750	Intracranial injury	16.4	Exeat	1	0	0	0	0	0	0
319	0	1	0	75	Religieuse	78	2040	Open wounds of extremities	16.6.2	Exeat	1	0	0	0	0	0	0
320	0	1	0	28	?	?	?	Other inflammatory diseases of female pelvic organs	10.3.2.4	Tr (Gynéco)	0	1	0	0	0	0	0
321	0	1	0	77	Couturière	22	8350	Transient cerebral ischemia	7.3.4	Tr (Cardio)	0	1	0	0	0	0	0
322	0	1	0	16	?	?	?	Superficial injury; contusion	16.8	Exeat	1	0	0	0	0	0	0
323	0	1	0	19	Ménagère	6	4230	Calculus of kidney	10.1.5.1	Exeat	1	0	0	0	0	0	0
324	0	1	0	47	Ouvrière	20	6260	Fracture of ribs; closed	16.2.5.2	Décharge	0	0	1	0	0	0	0
325	0	1	0	19	Ménagère	6	4230	Poisoning by other medications and drugs	16.11.2	Exeat	1	0	0	0	0	0	0
326	0	1	0	55	Cultivateur	42	205	Fracture of ribs; closed	16.2.5.2	Tr (Traumato)	0	1	0	0	0	0	0
327	1	0	0	35	Maçon	20	6220	Open wounds of head; neck; and trunk	16.6.1	Evadé	0	0	0	1	0	0	0
328	0	0	1	8	Ecolier	student	student	Open wounds of extremities	16.6.2	Exeat	1	0	0	0	0	0	0
329	1	0	0	75	Cultivateur	42	205	Inguinal hernia	9.5.1	Tr (Viscéral)	0	1	0	0	0	0	0
330	0	0	1	13	Ecolier	student	student	Diseases of the respiratory system	8	Tr (Pédiatrie)	0	1	0	0	0	0	0
331	1	0	0	20	?	?	?	Open wounds of head; neck; and trunk	16.6.1	Exeat	1	0	0	0	0	0	0
332	1	0	0	28	Mécanicien	36	7200	Joint disorders and dislocations; trauma-related	16.1	Exeat	1	0	0	0	0	0	0
333	1	0	0	54	Asistant d'administration	53	5700	Poisoning	16.11	Exeat	1	0	0	0	0	0	0
334	0	1	0	23	Cultivateur	42	205	Other infections; including parasitic	1.4	Tr (MI)	0	1	0	0	0	0	0
335	0	1	0	18	Etudiant	student	student	Ectopic pregnancy	11.3.1	Tr (Gynéco)	0	1	0	0	0	0	0
336	0	0	1	6	Ecolier	student	student	Superficial injury; contusion	16.8	Exeat	1	0	0	0	0	0	0
337	0	1	0	40	Ménagère	6	4230	Alcohol-related disorders	5.11	Tr (HGE)	0	1	0	0	0	0	0
338	0	0	1	5	?	?	?	Superficial injury; contusion	16.8	Exeat	1	0	0	0	0	0	0
339	1	0	0	46	Bricoleur	45	7340	Other fracture of upper limb	16.2.3.3	Exeat	1	0	0	0	0	0	0
340	1	0	0	15	Ecolier	student	student	Infectious and parasitic diseases	1	Tr (MI)	0	1	0	0	0	0	0
341	1	0	0	22	Etudiant	student	student	Fluid and electrolyte disorders	3.8	Exeat	1	0	0	0	0	0	0
342	1	0	0	59	Menuisier	28	6230	Injury and poisoning	16	Exeat	1	0	0	0	0	0	0
343	1	0	0	45	?	?	?	Superficial injury; contusion	16.8	Exeat	1	0	0	0	0	0	0
344	1	0	0	21	Etudiant	student	student	Superficial injury; contusion	16.8	Exeat	1	0	0	0	0	0	0
345	0	1	0	38	Cultivateur	42	205	Intracranial injury	16.4	Tr (Traumato)	0	1	0	0	0	0	0
346	1	0	0	17	Etudiant	student	student	Intracranial injury	16.4	Tr (Traumato)	0	1	0	0	0	0	0
347	1	0	0	15	Ecolier	student	student	Other injuries and conditions due to external causes	16.12	Exeat	1	0	0	0	0	0	0
348	1	0	0	32	Maçon	20	6220	Fractures	16.2	Exeat	1	0	0	0	0	0	0
349	1	0	0	65	Militaire retraité	retired	retired	Intestinal obstruction without hernia	9.6.3	Tr (Bloc)	0	1	0	0	0	0	0
350	0	1	0	24	Etudiant	student	student	mood disorders	5.8	Exeat	1	0	0	0	0	0	0
351	0	1	0	24	Etudiant	student	student	Other inflammatory diseases of female pelvic organs	10.3.2.4	Tr (Gynéco)	0	1	0	0	0	0	0
352	1	0	0	30	?	?	?	Somatoform disorders	5.15.7	Exeat	1	0	0	0	0	0	0
353	0	1	0	15	Ecolier	student	student	Poisoning by other medications and drugs	16.11.2	Exeat	1	0	0	0	0	0	0
354	0	1	0	27	Ménagère	6	4230	Diseases of female genital organs	10.3	Tr (Gynéco)	0	1	0	0	0	0	0
355	1	0	0	61	Surveillant retraité	retired	retired	Liver disease	9.8	Tr (HGE)	0	1	0	0	0	0	0
356	1	0	0	61	Retraité	retired	retired	Diabetes mellitus with complications	3.3	Tr (HGE)	0	1	0	0	0	0	0
357	1	0	0	25	Chômeur	unemployed	unemployed	Fracture of tibia and fibula	16.2.4.1	Exeat	1	0	0	0	0	0	0
358	0	1	0	60	Ménagère	6	4230	gastroduodenal ulcer (except hemorrhage)	9.4.2	Tr (HGE)	0	1	0	0	0	0	0
359	0	1	0	66	?	?	?	Fracture of upper limb	16.2.3	Tr (Traumato)	0	1	0	0	0	0	0
360	1	0	0	75	Cultivateur	42	205	Intracranial injury	16.4	Exeat	1	0	0	0	0	0	0
361	1	0	0	24	Docker	32	9750	Superficial injury; contusion	16.8	Evadé	0	0	0	1	0	0	0
362	1	0	0	78	Directeur bancaire retraité	retired	retired	Chronic renal failure	10.1.3	Décès	0	0	0	0	1	0	0
363	1	0	0	53	Retraité	retired	retired	injury and poisoning	16	Exeat	1	0	0	0	0	0	0
364	1	0	0	61	Commerçant	20	4950	Occlusion of cerebral arteries	7.3.1.2	Tr (Cardio)	0	1	0	0	0	0	0
365	1	0	0	40	Commerçant	20	4950	Open wounds of head; neck; and trunk	16.6.1	Exeat	1	0	0	0	0	0	0
366	1	0	0	63	Electricien	52	6355	Acute cerebrovascular disease	7.3.1	Tr (Cardio)	0	1	0	0	0	0	0
367	1	0	0	63	Electricien	52	6355	Acute cerebrovascular disease	7.3.1	Tr (Neuro-Psy)	0	1	0	0	0	0	0
368	1	0	0	60	Docker	32	9750	Unspecified renal failure	10.1.2.2	Décès	0	0	0	0	1	0	0
369	1	0	0	51	Gardien	39	3930	Acute cerebrovascular disease	7.3.1	Tr (Neuro-Psy)	0	1	0	0	0	0	0
370	1	0	0	35	Soudeur	34	8140	Injury and poisoning	16	Exeat	1	0	0	0	0	0	0
371	0	1	0	30	Ménagère	6	4230	abdominal pain	17.1.7	Tr (Gynéco)	0	1	0	0	0	0	0
372	0	1	0	21	Ménagère	6	4230	Somatoform disorders	5.15.7	Exeat	1	0	0	0	0	0	0
373	0	1	0	32	?	?	?	Joint disorders and dislocations; trauma-related	16.1	Exeat	1	0	0	0	0	0	0
374	0	1	0	46	Technicien	40	7630	Alcohol-related disorders	5.11	Evadé	0	0	0	1	0	0	0
375	1	0	0	33	Commerçant	20	4950	Superficial injury; contusion	16.8	Exeat	1	0	0	0	0	0	0
376	1	0	0	46	?	?	?	Fractures	16.2	Tr (Traumato)	0	1	0	0	0	0	0
377	0	1	0	63	Ménagère	6	4230	Occlusion of cerebral arteries	7.3.1.2	Tr (MI)	0	1	0	0	0	0	0
378	1	0	0	24	Etudiant	student	student	Other infections; including parasitic	1.4	Tr (MI)	0	1	0	0	0	0	0
379	0	1	0	50	Ménagère	6	4230	Somatoform disorders	5.15.7	Exeat	1	0	0	0	0	0	0
380	0	1	0	49	Cultivateur	42	205	Superficial injury; contusion	16.8	Exeat	1	0	0	0	0	0	0
381	1	0	0	26	?	?	?	Open wounds of extremities	16.6.2	Exeat	1	0	0	0	0	0	0
382	1	0	0	19	?	?	?	Intracranial injury	16.4	Exeat	1	0	0	0	0	0	0
383	0	1	0	30	Vendeur	20	4950	Other gram negative septicemia	1.1.2.4	Décharge	0	0	1	0	0	0	0
384	0	0	1	12	Ecolier	student	student	Open wounds of extremities	16.6.2	Exeat	1	0	0	0	0	0	0
385	1	0	0	20	Etudiant	student	student	Superficial injury; contusion	16.8	Exeat	1	0	0	0	0	0	0
386	1	0	0	27	Menuisier	28	6230	Open wounds of extremities	16.6.2	Exeat	1	0	0	0	0	0	0
387	0	0	1	10	Ecolier	student	student	Superficial injury; contusion	16.8	Exeat	1	0	0	0	0	0	0
388	1	0	0	68	Chômeur	unemployed	unemployed			CED	0	0	0	0	0	1	0
389	1	0	0	21	Etudiant	student	student	Other infections; including parasitic	1.4	Exeat	1	0	0	0	0	0	0
390	1	0	0	49	Policier	78	3850	Open wounds of extremities	16.6.2	Exeat	1	0	0	0	0	0	0
391	1	0	0	19	Aide-chauffeur	31	9140	Intracranial injury	16.4	Tr (Traumato)	0	1	0	0	0	0	0
392	0	0	1	4.5	?	?	?	injury and poisoning	16	Exeat	1	0	0	0	0	0	0
393	1	0	0	63	Retraité	retired	retired	Tuberculosis	1.1.1	Décès	0	0	0	0	1	0	0
394	1	0	0	65	Commissaire de police retraité	retired	retired	Hypertension with complications and secondary hypertension	7.1.2	Décharge	0	0	1	0	0	0	0
395	1	0	0	35	Commerçant	20	4950	Other fracture of lower limb	16.2.4.3	Tr (Traumato)	0	1	0	0	0	0	0
396	1	0	0	27	?	?	?	Open wounds	16.6	Evadé	0	0	0	1	0	0	0
397	1	0	0	29	Tireur de pousse-pousse	15	9150	Superficial injury; contusion	16.8	Exeat	1	0	0	0	0	0	0
398	1	0	0	31	?	?	?	Superficial injury; contusion	16.8	Exeat	1	0	0	0	0	0	0
399	1	0	0	42	Soudeur	34	8140	Burns	16.9	Décharge	0	0	1	0	0	0	0
400	1	0	0	15	Ecolier	student	student	DIseases of male genital organs	10.2	Tr (Uro)	0	1	0	0	0	0	0
401	1	0	0	27	Conducteur	32	9120	Superficial injury; contusion	16.8	Tr (ORLO)	0	1	0	0	0	0	0
402	0	1	0	52	Ménagère	6	4230	Other gram negative septicemia	1.1.2.4	Tr (MI)	0	1	0	0	0	0	0
403	1	0	0	62	Marin	46	9300	Burns	16.9	Tr (Traumato)	0	1	0	0	0	0	0
404	0	1	0	40	Ménagère	6	4230	injury and poisoning	16	Exeat	1	0	0	0	0	0	0
405	0	1	0	30	Coiffeuse	27	4510	Somatoform disorders	5.15.7	Exeat	1	0	0	0	0	0	0
406	0	1	0	36	Ménagère	6	4230	Pulmonary heart disease	7.2.6	Tr (Cardio)	0	1	0	0	0	0	0
407	0	1	0	40	Enseignant	84	2310	Conditions associated with dizziness or vertigo	6.8.2	Décharge	0	0	1	0	0	0	0
408	0	1	0	41	Ménagère	6	4230	Hypertension	7.1	Tr (Cardio)	0	1	0	0	0	0	0
409	0	1	0	70	Cultivateur	42	205	Occlusion of cerebral arteries	7.3.1.2	Tr (Neuro-psy)	0	1	0	0	0	0	0
410	1	0	0	17	Etudiant	student	student	Other gram negative septicemia	1.1.2.4	Tr (MI)	0	1	0	0	0	0	0
411	0	1	0	41	Enseignant	84	2310			CED	0	0	0	0	0	1	0
412	1	0	0	60	Chef d'équipe SOGEDIPROMA	39	6005	Alcohol-related disorders	5.11	Décharge	0	0	1	0	0	0	0
413	0	1	0	72	Ménagère	6	4230	Intestinal obstruction without hernia	9.6.3	Evasan Tanà	0	0	0	0	0	0	1
414	0	1	0	56	Ménagère	6	4230	Hypertension with complications and secondary hypertension	7.1.2	Exeat	1	0	0	0	0	0	0
415	0	1	0	60	Ménagère	6	4230	Other fracture of lower limb	16.2.4.3	Tr (Traumato)	0	1	0	0	0	0	0
416	0	1	0	55	Surveillant	82	1310	Superficial injury; contusion	16.8	Tr (Traumato)	0	1	0	0	0	0	0
417	0	1	0	40	?	?	?	intestinal infection	9.1	Exeat	1	0	0	0	0	0	0
418	0	1	0	50	?	?	?	Infectious and parasitic diseases	1	Tr (MI)	0	1	0	0	0	0	0
419	0	1	0	28	Vendeur	20	4950	Intracranial injury	16.4	Exeat	1	0	0	0	0	0	0
420	0	1	0	18	Etudiant	student	student	Esophageal disorders	9.4.1	Exeat	1	0	0	0	0	0	0
421	0	1	0	30	Vendeur	20	4950	Superficial injury; contusion	16.8	Exeat	1	0	0	0	0	0	0
422	1	0	0	78	Retraité	retired	retired	Somatoform disorders	5.15.7	Exeat	1	0	0	0	0	0	0
423	1	0	0	24	Foot-balleur	33	2720	Open wounds of extremities	16.6.2	Evadé	0	0	0	1	0	0	0
424	0	1	0	17	Ecolier	student	student	Fracture of lower limb	16.2.4	Tr (Traumato)	0	1	0	0	0	0	0
425	0	1	0	51	Cultivateur	42	205	Anemia	4.1	Tr (MI)	0	1	0	0	0	0	0
426	0	1	0	67	Cultivateur	42	205	Pneumonia (except that caused by TB or STD)	8.1.1	Tr (2P)	0	1	0	0	0	0	0
427	1	0	0	71	Retraité	retired	retired	Cancer of bronchus; lung	2.3	Exeat	1	0	0	0	0	0	0
428	0	1	0	35	Servante	6	4230	Ovarian cyst	10.3.6	Tr (Gynéco)	0	1	0	0	0	0	0
429	0	1	0	35	?	?	?	cancer of uterus	2.6.1	Tr (Gynéco)	0	1	0	0	0	0	0
430	1	0	0	18	Mécanicien	36	7200	Open wounds of head; neck; and trunk	16.6.1	Décharge	0	0	1	0	0	0	0
431	0	0	1	2	?	?	?	Superficial injury; contusion	16.8	Exeat	1	0	0	0	0	0	0
432	1	0	0	52	Médecin	100	3060	Tuberculosis	1.1.1	Décès	0	0	0	0	1	0	0
433	0	1	0	61	Cultivateur	42	205	Obstructive chronic bronchitis	8.2.3	Exeat	1	0	0	0	0	0	0
434	1	0	0	21	?	?	?	Open wounds of extremities	16.6.2	Exeat	1	0	0	0	0	0	0
435	0	1	0	43	Ménagère	6	4230	Poisoning	16.11	Décharge	0	0	1	0	0	0	0
436	1	0	0	63	Restaurateur	40	4000	Anal and rectal conditions	9.6.5	Tr (HGE)	0	1	0	0	0	0	0
437	1	0	0	28	Cultivateur	42	205	Liver disease	9.8	Décharge	0	0	1	0	0	0	0
438	1	0	0	55	Charpentier	28	6230	Gastrointestinal hemorrhage	9.10.0	Tr (HGE)	0	1	0	0	0	0	0
439	1	0	0	75	Chauffeur	31	9140	Hypertension with complications and secondary hypertension	7.1.2	Tr (MI)	0	1	0	0	0	0	0
440	1	0	0	80	?	?	?	Occlusion of cerebral arteries	7.3.1.2	Tr (Cardio)	0	1	0	0	0	0	0
441	1	0	0	28	?	?	?	Burns	16.9	Décharge	0	0	1	0	0	0	0
442	1	0	0	92	Marchand ambulant retraité	retired	retired	Somatoform disorders	5.15.7	Exeat	1	0	0	0	0	0	0
443	1	0	0	22	Etudiant	student	student	Skull and face fractures	16.2.2	Exeat	1	0	0	0	0	0	0
444	1	0	0	46	Pëcheur	23	6100	Skull and face fractures	16.2.2	Décès	0	0	0	0	1	0	0
445	1	0	0	29	Electricien	52	6355	Injury and poisoning	16	Tr (Uro)	0	1	0	0	0	0	0
446	1	0	0	80	Cultivateur	42	205	Diseases of male genital organs	10.2	Tr (Uro)	0	1	0	0	0	0	0
447	1	0	0	32	Maçon	20	6220	Intestinal infection	9.1	Exeat	1	0	0	0	0	0	0
448	1	0	0	60	Chauffeur	31	9140	Lumbago	13.3.3.3	Tr (Neuro-Psy)	0	1	0	0	0	0	0
449	1	0	0	64	Pasteur	78	2040	Fracture of radius and ulna	16.2.3.2	Tr (Traumato)	0	1	0	0	0	0	0
450	0	0	1	0.833333	?	?	?	Open wounds of head; neck; and trunk	16.6.1	Tr (Pédiatrie)	0	1	0	0	0	0	0
451	1	0	0	20	Etudiant	student	student	Appendicitis and other appendiceal conditions	9.6.1	Tr (Viscéral)	0	1	0	0	0	0	0
452	1	0	0	30	Logistique pétrolier	93	1520	Open wounds of head; neck; and trunk	16.6.1	Evadé	0	0	0	1	0	0	0
453	0	1	0	49	Ménagère	6	4230	Other intestinal obstruction	9.6.3.4	Exeat	1	0	0	0	0	0	0
454	1	0	0	35	Marin	46	9300	Joint disorders and dislocations; trauma-related	16.1	Tr (Traumato)	0	1	0	0	0	0	0
455	1	0	0	29	Cultivateur	42	205	Joint disorders and dislocations; trauma-related	16.1	Tr (Traumato)	0	1	0	0	0	0	0
456	1	0	0	57	?	?	?	Hypertension with complications and secondary hypertension	7.1.2	Tr (Cardio)	0	1	0	0	0	0	0
457	1	0	0	64	Guide touristique	33	4540	Poisoning	16.11	Décès	0	0	0	0	1	0	0
458	1	0	0	24	?	?	?	Open wounds of head; neck; and trunk	16.6.1	Exeat	1	0	0	0	0	0	0
459	1	0	0	33	?	?	?	injury and poisoning	16	Tr (ORLO)	0	1	0	0	0	0	0
460	0	1	0	23	Infirmière	84	3255	Superficial injury; contusion	16.8	Exeat	1	0	0	0	0	0	0
461	1	0	0	23	Etudiant	student	student	Superficial injury; contusion	16.8	Exeat	1	0	0	0	0	0	0
462	1	0	0	60	Chauffeur	31	9140	Hypertension with complications and secondary hypertension	7.1.2	Décharge	0	0	1	0	0	0	0
463	1	0	0	40	Mécanicien	36	7200	gastroduodenal ulcer (except hemorrhage)	9.4.2	Tr (HGE)	0	1	0	0	0	0	0
464	0	1	0	31	Ménagère	6	4230	Ectopic pregnancy	11.3.1	Tr (Gynéco)	0	1	0	0	0	0	0
465	1	0	0	34	?	?	?	Intracranial injury	16.4	Exeat	1	0	0	0	0	0	0
466	1	0	0	40	Cultivateur	42	205	Injury and poisoning	16	Tr (ORLO)	0	1	0	0	0	0	0
467	1	0	0	46	Cultivateur	42	205	Open wounds of head; neck; and trunk	16.6.1	Tr (ORLO)	0	1	0	0	0	0	0
468	1	0	0	46	?	?	?	Heart failure	7.2.11.2	Décharge	0	0	1	0	0	0	0
469	1	0	0	37	Maçon	20	6220	Miscellaneous mental disorders	5.15	Exeat	1	0	0	0	0	0	0
470	1	0	0	30	?	?	?			CED	0	0	0	0	0	1	0
471	1	0	0	22	?	?	?	Intracranial injury	16.4	Exeat	1	0	0	0	0	0	0
472	1	0	0	69	Pasteur FJKM	78	2040	Congestive heart failure	7.2.11.1	Tr (Cardio)	0	1	0	0	0	0	0
473	1	0	0	63	?	?	?	Open wounds of extremities	16.6.2	Exeat	1	0	0	0	0	0	0
474	0	1	0	31	Vendeur	20	4950	Open wounds of head; neck; and trunk	16.6.1	Exeat	1	0	0	0	0	0	0
475	1	0	0	36	Commerçant	20	4950	Open wounds	16.6	Exeat	1	0	0	0	0	0	0
476	1	0	0	41	Cultivateur	42	205	Other infections; including parasitic	1.4	Tr (MI)	0	1	0	0	0	0	0
477	1	0	0	41	Cultivateur	42	205	Acute renal failure	10.1.2.1	Tr (Uro)	0	1	0	0	0	0	0
478	1	0	0	60	?	?	?	Alcohol-related disorders	5.11	Tr (Neuro-Psy)	0	1	0	0	0	0	0
479	0	0	1	7	Ecolier	student	student	Intracranial injury	16.4	Tr (Traumato)	0	1	0	0	0	0	0
480	1	0	0	27	Bricoleur	45	7340	Superficial injury; contusion	16.8	Exeat	1	0	0	0	0	0	0
481	0	1	0	30	?	?	?	Open wounds of extremities	16.6.2	Exeat	1	0	0	0	0	0	0
482	1	0	0	20	Receveur	32	9120	Superficial injury; contusion	16.8	Exeat	1	0	0	0	0	0	0
483	1	0	0	38	Chauffeur	31	9140	Other infections; including parasitic	1.4	Tr (MI)	0	1	0	0	0	0	0
484	0	1	0	36	Ménagère	6	4230	Other upper respiratory disease	8.9	Décès	0	0	0	0	1	0	0
485	0	1	0	67	Ménagère	6	4230	Superficial injury; contusion	16.8	Exeat	1	0	0	0	0	0	0
486	0	1	0	36	Ménagère	6	4230	Inflammatory diseases of female pelvic organs	10.3.2	Tr (Gynéco)	0	1	0	0	0	0	0
487	0	1	0	55	Ménagère	6	4230	Other and unspecified metabolic; nutritional; and endocrine disorders	3.11.3	Exeat	1	0	0	0	0	0	0
488	0	1	0	30	Vendeur	20	4950	Intracranial injury	16.4	Exeat	1	0	0	0	0	0	0
489	0	1	0	48	?	?	?	abdominal pain	17.1.7	Tr (HGE)	0	1	0	0	0	0	0
490	1	0	0	22	Maçon	20	6220	Open wounds	16.6	Décharge	0	0	1	0	0	0	0
491	1	0	0	23	?	?	?	Alcohol-related disorders	5.11	Exeat	1	0	0	0	0	0	0
492	0	1	0	27	Coiffeur	27	4510	Complications mainly related to pregnancy	11.3	Tr (CME)	0	1	0	0	0	0	0
493	0	1	0	60	Ménagère	6	4230	Hemorrhoids	7.5.3	Tr (HGE)	0	1	0	0	0	0	0
494	1	0	0	44	Cultivateur	42	205	Open wounds of extremities	16.6.2	Exeat	1	0	0	0	0	0	0
495	1	0	0	24	Agent de sécurité	39	3930	Open wounds	16.6	Exeat	1	0	0	0	0	0	0
496	1	0	0	27	Etudiant	student	student	Open wounds of head; neck; and trunk	16.6.1	Exeat	1	0	0	0	0	0	0
497	1	0	0	35	Charpentier	28	6230	Open wounds of extremities	16.6.2	Tr (Traumato)	0	1	0	0	0	0	0
498	1	0	0	60	Cultivateur	42	205	Fracture of neck of femur (hip)	16.2.1	Tr (Bloc)	0	1	0	0	0	0	0
499	0	1	0	70	Cultivateur	42	205	Hematemesis	9.10.6	Tr (HGE)	0	1	0	0	0	0	0
500	0	1	0	56	Ménagère	6	4230	cancer of breast	2.5	Tr (CME)	0	1	0	0	0	0	0
501	1	0	0	26	Cultivateur	42	205	injury and poisoning	16	Tr (ORLO)	0	1	0	0	0	0	0
502	0	0	1	5	Ecolier	student	student	injury and poisoning	16	Tr (ORLO)	0	1	0	0	0	0	0
503	0	1	0	29	Cultivateur	42	205	Anemia	4.1	Décharge	0	0	1	0	0	0	0
504	0	1	0	80	Cultivateur	42	205	Superficial injury; contusion	16.8	Exeat	1	0	0	0	0	0	0
505	1	0	0	18	Cultivateur	42	205	Open wounds of extremities	16.6.2	Exeat	1	0	0	0	0	0	0
506	1	0	0	67	Ingénieur retraité	retired	retired	abdominal pain	17.1.7	Tr (HGE)	0	1	0	0	0	0	0
507	1	0	0	36	?	?	?	heart Failure	7.2.11.2	Tr (Cardio)	0	1	0	0	0	0	0
508	1	0	0	58	Militaire retraité	retired	retired			CED	0	0	0	0	0	1	0
509	1	0	0	21	Plongeur	1	4140	Open wounds	16.6	Exeat	1	0	0	0	0	0	0
510	0	1	0	57	Ménagère	6	4230	Diabetes mellitus with complications	3.3	Tr (Cardio)	0	1	0	0	0	0	0
511	1	0	0	63	Retraité	retired	retired	Alcohol-related disorders	5.11	Exeat	1	0	0	0	0	0	0
512	0	1	0	16	Collégienne	student	student	Superficial injury; contusion	16.8	Exeat	1	0	0	0	0	0	0
513	1	0	0	59	Bricoleur	45	7340	Pneumonia (except that caused by TB or STD)	8.1.1	Décès	0	0	0	0	1	0	0
514	1	0	0	50	Ingénieur	93	1530	Coronary atherosclerosis and other heart disease	7.2.4	Tr (Cardio)	0	1	0	0	0	0	0
515	0	1	0	50	Cultivateur	42	205	Benign neoplasm of uterus	2.16.1	Tr (Gynéco)	0	1	0	0	0	0	0
516	0	1	0	63	Cultivateur	42	205	injury and poisoning	16	Transfert (Traumato)	0	1	0	0	0	0	0
517	1	0	0	64	Détenu	prisoner	prisoner	Depressive disorders	5.8.2	Tr (Neuro)	0	1	0	0	0	0	0
518	1	0	0	40	Tireur de pousse-pousse	15	9150	Superficial injury; contusion	16.8	Exeat	1	0	0	0	0	0	0
519	1	0	0	23	Agent Aqualma	34	4760	Other fractures	16.2.5	Tr (Traumato)	0	1	0	0	0	0	0
520	1	0	0	84	Marin	46	9300	Occlusion of cerebral arteries	7.3.1.2	Tr (Cardio)	0	1	0	0	0	0	0
521	1	0	0	60	Marin	46	9300	Superficial injury; contusion	16.8	Exeat	1	0	0	0	0	0	0
522	1	0	0	42	Ménagère	6	4230	Open wounds of extremities	16.6.2	Exeat	1	0	0	0	0	0	0
523	1	0	0	70	Cultivateur	42	205	Calculus of urinary tract	10.1.5	Tr (Uro)	0	1	0	0	0	0	0
524	1	0	0	23	Tireur de pousse-pousse	15	9150	Intracranial injury	16.4	Exeat	1	0	0	0	0	0	0
525	1	0	0	28	?	?	?	Alcohol-related disorders	5.11	Exeat	1	0	0	0	0	0	0
526	1	0	0	70	Retraité	retired	retired	Coronary atherosclerosis and other heart disease	7.2.4	Tr (Cardio)	0	1	0	0	0	0	0
527	1	0	0	29	Détenu (cultivateur)	prisoner	prisoner	Open wounds of head; neck; and trunk	16.6.1	Exeat	1	0	0	0	0	0	0
528	1	0	0	36	Tôlier	41	6520	Open wounds of head; neck; and trunk	16.6.1	Exeat	1	0	0	0	0	0	0
529	1	0	0	58	Enseignant	84	2310	Retention of urine	10.1.8.2	Tr (Uro)	0	1	0	0	0	0	0
530	1	0	0	44	Cultivateur	42	205	Open wounds of head; neck; and trunk	16.6.1	Exeat	1	0	0	0	0	0	0
531	1	0	0	62	?	?	?			CED	0	0	0	0	0	1	0
532	1	0	0	60	Comptable	86	800	Other intestinal obstruction	9.6.3.4	Exeat	1	0	0	0	0	0	0
533	1	0	0	52	?	?	?	Pneumonia (except that caused by TB or STD)	8.1.1	Décharge	0	0	1	0	0	0	0
534	0	1	0	78	?	?	?	Fracture of neck of femur (hip)	16.2.1	Tr (Traumato)	0	1	0	0	0	0	0
535	0	1	0	35	Ménagère	6	4230	Ectopic pregnancy	11.3.1	Tr (Gynéco)	0	1	0	0	0	0	0
536	0	1	0	50	Ménagère	6	4230	Hypertension with complications and secondary hypertension	7.1.2	Tr (Cardio)	0	1	0	0	0	0	0
537	0	1	0	15	Charbonnière	41	6820	cancer of pancreas	2.2.4	Tr (HGE)	0	1	0	0	0	0	0
538	0	1	0	77	?	?	?	Gastrointestinal hemorrhage	9.10.0	Tr (HGE)	0	1	0	0	0	0	0
539	0	1	0	24	Ménagère	6	4230	Somatoform disorders	5.15.7	Exeat	1	0	0	0	0	0	0
540	1	0	0	26	Pëcheur	23	6100	Open wounds of head; neck; and trunk	16.6.1	Exeat	1	0	0	0	0	0	0
541	1	0	0	41	Commerçant	20	4950	Other infections; including parasitic	1.4	Tr (MI)	0	1	0	0	0	0	0
542	1	0	0	35	Docker	32	9750	Pneumonia (except that caused by TB or STD)	8.1.1	Décharge	0	0	1	0	0	0	0
543	1	0	0	16	Cultivateur	42	205	Other infections; including parasitic	1.4	Tr (MI)	0	1	0	0	0	0	0
544	1	0	0	32	Infirmier	84	3255	Joint disorders and dislocations; trauma-related	16.1	Tr (Bloc)	0	1	0	0	0	0	0
545	1	0	0	40	Maçon	20	6220	Superficial injury; contusion	16.8	Décharge	0	0	1	0	0	0	0
546	1	0	0	20	Missionnaire	52	2060	Open wounds of head; neck; and trunk	16.6.1	Exeat	1	0	0	0	0	0	0
547	1	0	0	69	?	?	?	Retention of urine	10.1.8.2	Evadé	0	0	0	1	0	0	0
548	1	0	0	19	Etudiant	student	student	Lumbago	13.3.3.3	Exeat	1	0	0	0	0	0	0
549	1	0	0	24	Chauffeur	31	9140	Superficial injury; contusion	16.8	Tr (Traumato)	0	1	0	0	0	0	0
550	1	0	0	33	Marin	46	9300	Superficial injury; contusion	16.8	Exeat	1	0	0	0	0	0	0
551	0	0	1	4	?	?	?	Superficial injury; contusion	16.8	Exeat	1	0	0	0	0	0	0
552	1	0	0	19	?	?	?	intestinal infection	9.1	Tr (MI)	0	1	0	0	0	0	0
553	0	0	1	9	?	?	?	Open wounds of head; neck; and trunk	16.6.1	Exeat	1	0	0	0	0	0	0
554	0	1	0	56	Infirmière cadre	84	3255	Superficial injury; contusion	16.8	Exeat	1	0	0	0	0	0	0
555	0	1	0	53	?	?	?	Hypertension with complications and secondary hypertension	7.1.2	Exeat	1	0	0	0	0	0	0
556	0	0	1	3	?	?	?	Intracranial injury	16.4	Exeat	1	0	0	0	0	0	0
557	1	0	0	28	Pëcheur	23	6100	Alcohol-related disorders	5.11	Décharge	0	0	1	0	0	0	0
558	0	1	0	58	Vendeur	20	4950	Acute cerebrovascular disease	7.3.1	Tr (Neuro-psy)	0	1	0	0	0	0	0
559	0	1	0	50	Cultivateur	42	205	Open wounds of head; neck; and trunk	16.6.1	Exeat	1	0	0	0	0	0	0
560	1	0	0	30	Docker	32	9750	Open wounds of extremities	16.6.2	Exeat	1	0	0	0	0	0	0
561	1	0	0	20	Etudiant	student	student	Cancer of head and neck	2.11.1	Tr (ORLO)	0	1	0	0	0	0	0
562	1	0	0	20	?	?	?	Open wounds of head; neck; and trunk	16.6.1	Exeat	1	0	0	0	0	0	0
563	0	0	1	14	Etudiant	student	student	Open wounds of head; neck; and trunk	16.6.1	Exeat	1	0	0	0	0	0	0
564	0	1	0	26	Enseignant	84	2310	Superficial injury; contusion	16.8	Exeat	1	0	0	0	0	0	0
565	0	1	0	57	Commerçant	20	4950	Transient cerebral ischemia	7.3.4	Tr (MI)	0	1	0	0	0	0	0
566	1	0	0	63	Comptable retraité	retired	retired	Cirrhosis of liver without mention of alcohol	9.8.2.1	Tr (HGE)	0	1	0	0	0	0	0
567	0	1	0	21	Personnel paramédical	63	3400	Somatoform disorders	5.15.7	Exeat	1	0	0	0	0	0	0
568	0	1	0	19	Artisan	58	2600	Appendicitis and other appendiceal conditions	9.6.1	Tr (Viscéral)	0	1	0	0	0	0	0
569	0	1	0	39	Ménagère	6	4230	Somatoform disorders	5.15.7	Exeat	1	0	0	0	0	0	0
570	1	0	0	21	Tireur de pousse-pousse	15	9150	Open wounds	16.6	Exeat	1	0	0	0	0	0	0
571	1	0	0	?	?	?	?			CED	0	0	0	0	0	1	0
572	0	0	1	12	Ecolier	student	student	Peritonitis and intestinal abscess	9.6.6	Tr (Bloc)	0	1	0	0	0	0	0
573	0	1	0	22	Etudiant	student	student	Superficial injury; contusion	16.8	Exeat	1	0	0	0	0	0	0
574	0	1	0	65	Cultivateur	42	205	Fluid and electrolyte disorders	3.8	Décharge	0	0	1	0	0	0	0
575	0	1	0	85	Cultivateur	42	205	heart Failure	7.2.11.2	Tr (Cardio)	0	1	0	0	0	0	0
576	0	1	0	20	?	?	?	Joint disorders and dislocations; trauma-related	16.1	Exeat	1	0	0	0	0	0	0
577	0	0	1	14	Hoome de ménage	6	4230	Open wounds of extremities	16.6.2	Exeat	1	0	0	0	0	0	0
578	1	0	0	14	Ecolier	student	student	Pneumonia (except that caused by TB or STD)	8.1.1	Exeat	1	0	0	0	0	0	0
579	0	1	0	20	Etudiant	student	student	Other asthma with acute exacerbation	8.3.2.3	Exeat	1	0	0	0	0	0	0
580	1	0	0	23	?	?	?	Intestinal obstruction without hernia	9.6.3	Tr (Bloc)	0	1	0	0	0	0	0
581	1	0	0	28	?	?	?	Superficial injury; contusion	16.8	Exeat	1	0	0	0	0	0	0
582	0	1	0	27	?	?	?	Superficial injury; contusion	16.8	Exeat	1	0	0	0	0	0	0
583	1	0	0	20	Cultivateur	42	205	Other miscellaneous mental conditions	5.15.9	Evadé	0	0	0	1	0	0	0
584	1	0	0	25	?	?	?	Intracranial injury	16.4	Evadé	0	0	0	1	0	0	0
585	1	0	0	17	Etudiant	student	student	poisoning by nonmedicinal substances	16.11.3	Tr (HGE)	0	1	0	0	0	0	0
586	1	0	0	26	Mécanicien	36	7200	Superficial injury; contusion	16.8	Exeat	1	0	0	0	0	0	0
587	0	1	0	18	Ménagère	6	4230	Ectopic pregnancy	11.3.1	Tr (Gynéco)	0	1	0	0	0	0	0
588	0	1	0	25	Vendeur	20	4950	Appendicitis and other appendiceal conditions	9.6.1	Tr (Viscéral)	0	1	0	0	0	0	0
589	1	0	0	32	Serveur	25	4110			CED	0	0	0	0	0	1	0
590	1	0	0	26	Aide-chauffeur	31	9140	Open wounds of head; neck; and trunk	16.6.1	Exeat	1	0	0	0	0	0	0
591	1	0	0	26	Pêcheur	23	6100	Open wounds of head; neck; and trunk	16.6.1	Tr (ORLO)	0	1	0	0	0	0	0
592	0	1	0	26	Institutrice	84	2310	injury and poisoning	16	Tr (Traumato)	0	1	0	0	0	0	0
593	0	0	1	13	Ecolier	student	student	Open wounds of head; neck; and trunk	16.6.1	Exeat	1	0	0	0	0	0	0
594	0	1	0	46	Agent Aqualma	34	4760	Sprains and strains	16.7	Tr (Traumato)	0	1	0	0	0	0	0
595	0	1	0	38	Cultivateur	42	205	Sexually transmitted infections (not HIV or hepatitis)	1.1.3	Tr (MI)	0	1	0	0	0	0	0
596	0	1	0	35	?	?	?	Appendicitis and other appendiceal conditions	9.6.1	Tr (Viscéral)	0	1	0	0	0	0	0
597	0	1	0	31	Ménagère	6	4230	Fractures	16.2	Tr (Traumato)	0	1	0	0	0	0	0
598	1	0	0	37	Cultivateur	42	205	Fracture of ribs; closed	16.2.5.2	Tr (Traumato)	0	1	0	0	0	0	0
599	0	1	0	19	?	?	?	Superficial injury; contusion	16.8	Evadé	0	0	0	1	0	0	0
600	1	0	0	34	Démarcheur	government	government	Superficial injury; contusion	16.8	Exeat	1	0	0	0	0	0	0
601	1	0	0	25	Chômeur	unemployed	unemployed	Superficial injury; contusion	16.8	Exeat	1	0	0	0	0	0	0
602	0	1	0	16	Etudiant	student	student	Poisoning by other medications and drugs	16.11.2	Tr (Neuro-Psy)	0	1	0	0	0	0	0
603	0	1	0	15	Ecolier	student	student	Lower gastrointestinal disorders	9.6	Exeat	1	0	0	0	0	0	0
604	1	0	0	31	Infirmier	84	3255	Open wounds of extremities	16.6.2	Exeat	1	0	0	0	0	0	0
605	1	0	0	35	Tireur de pousse-pousse	15	9150	Superficial injury; contusion	16.8	Exeat	1	0	0	0	0	0	0
606	1	0	0	19	Menuisier	28	6230	Open wounds	16.6	Décharge	0	0	1	0	0	0	0
607	1	0	0	37	Collecteur	7	6050	Superficial injury; contusion	16.8	Exeat	1	0	0	0	0	0	0
608	1	0	0	71	Décortiqueur	13	4030	Tuberculosis	1.1.1	Tr (Cardio)	0	1	0	0	0	0	0
609	1	0	0	25	Cultivateur	42	205	Open wounds of head; neck; and trunk	16.6.1	Tr (Traumato)	0	1	0	0	0	0	0
610	1	0	0	18	Cultivateur	42	205	Injury and poisoning	16	Tr (Traumato)	0	1	0	0	0	0	0
611	1	0	0	21	Etudiant	student	student	Intracranial injury	16.4	Décharge	0	0	1	0	0	0	0
612	0	1	0	50	Cultivateur	42	205	Other and unspecified gastrointestinal disorders	9.12.3	Tr (Gynéco)	0	1	0	0	0	0	0
613	1	0	0	33	Cultivateur	42	205	Other fracture of lower limb	16.2.4.3	Tr (Traumato)	0	1	0	0	0	0	0
614	0	1	0	53	Ménagère	6	4230	Ascites	9.8.2.3	Tr (HGE)	0	1	0	0	0	0	0
615	0	1	0	62	Cultivateur	42	205	Superficial injury; contusion	16.8	Exeat	1	0	0	0	0	0	0
616	1	0	0	16	Cultivateur	42	205	Inguinal hernia	9.5.1	Tr (Bloc)	0	1	0	0	0	0	0
617	1	0	0	60	Cultivateur	42	205	heart Failure	7.2.11.2	Tr (Cardio)	0	1	0	0	0	0	0
618	1	0	0	60	Cultivateur	42	205	Heart failure	7.2.11.2	Tr (Cardio)	0	1	0	0	0	0	0
619	1	0	0	66	Bricoleur	45	7340	Other asthma with acute exacerbation	8.3.2.3	Tr (Cardio)	0	1	0	0	0	0	0
620	1	0	0	33	Cultivateur	42	205	convulsions	6.4.2	Tr (Neuro-psy)	0	1	0	0	0	0	0
621	1	0	0	49	Pompier	76	3740	Painful respiration	8.8.2	Exeat	1	0	0	0	0	0	0
622	1	0	0	28	Chômeur	unemployed	unemployed	Other infections; including parasitic	1.4	Décharge	0	0	1	0	0	0	0
623	1	0	0	75	Gendarme retraité	retired	retired	Tuberculosis	1.1.1	Tr (2P)	0	1	0	0	0	0	0
624	1	0	0	36	Tireur de pousse-pousse	15	9150	Endocrine; nutritional; and metabolic diseases and immunity disorders	3	Décharge	0	0	1	0	0	0	0
625	1	0	0	25	Tireur de pousse-pousse	15	9150	Injury and poisoning	16	Exeat	1	0	0	0	0	0	0
626	1	0	0	58	Agent d'Agriculture	53	1965	Acute cerebrovascular disease	7.3.1	Tr (Cardio)	0	1	0	0	0	0	0
627	1	0	0	29	Agent Aqualma	34	4760	Abdominal pain	17.1.7	Exeat	1	0	0	0	0	0	0
628	0	1	0	42	Personnel administratif IFIRP	53	3420	Other inflammatory diseases of female pelvic organs	10.3.2.4	Tr (Gynéco)	0	1	0	0	0	0	0
629	1	0	0	59	?	?	?	Acute cerebrovascular disease	7.3.1	Tr (Neuro)	0	1	0	0	0	0	0
630	0	0	1	7	Ecolier	student	student			CED	0	0	0	0	0	1	0
631	1	0	0	71	Chauffeur	31	9140	Other fracture of lower limb	16.2.4.3	Tr (Bloc)	0	1	0	0	0	0	0
632	0	1	0	41	Opérateur économique	77	740	Poisoning by other medications and drugs	16.11.2	Tr (Neuro-Psy)	0	1	0	0	0	0	0
633	0	1	0	50	Cultivateur	42	205	Anemia	4.1	Tr (MI)	0	1	0	0	0	0	0
634	0	1	0	50	Cultivateur	42	205	Other hematologic conditions	4.4	Tr (MI)	0	1	0	0	0	0	0
635	1	0	0	49	Gendarme	78	3850	Diseases of the circulatory system	7		0	0	0	1	0	0	0
636	1	0	0	38	Enseignant	84	2310	Superficial injury; contusion	16.8	Exeat	1	0	0	0	0	0	0
637	1	0	0	22	?	?	?	Open wounds of extremities	16.6.2	Exeat	1	0	0	0	0	0	0
638	1	0	0	20	?	?	?	Superficial injury; contusion	16.8	Exeat	1	0	0	0	0	0	0
639	1	0	0	22	?	?	?	Open wounds of head; neck; and trunk	16.6.1	Exeat	1	0	0	0	0	0	0
640	1	0	0	62	Agent STAR	56	510	Heart failure	7.2.11.2	Tr (Cardio)	0	1	0	0	0	0	0
641	1	0	0	27	Etudiant	student	student	Appendicitis and other appendiceal conditions	9.6.1	Tr (Viscéral)	0	1	0	0	0	0	0
642	0	1	0	29	Ménagère	6	4230	Mental Illness	5	Exeat	1	0	0	0	0	0	0
643	0	1	0	19	?	?	?	Other intestinal obstruction	9.6.3.4	Tr (Bloc)	0	1	0	0	0	0	0
644	0	1	0	38	Cuisinière	11	4020	Intracranial hemorrhage	7.3.1.1	Décès	0	0	0	0	1	0	0
645	0	1	0	40	Ménagère	6	4230	injury and poisoning	16	Tr (Traumato)	0	1	0	0	0	0	0
646	0	1	0	40	Vendeur	20	4950	Hepatitis	1.3.2	Tr (HGE)	0	1	0	0	0	0	0
647	0	1	0	40	Vendeur	20	4950	Cholelithiasis with acute cholecystitis	9.7.1	Tr (HGE)	0	1	0	0	0	0	0
648	0	1	0	37	Vendeur	20	4950	Inguinal hernia	9.5.1	Tr (MI)	0	1	0	0	0	0	0
649	0	1	0	37	Cultivateur	42	205	Infectious and parasitic diseases	1	Tr (MI)	0	1	0	0	0	0	0
650	0	1	0	33	?	?	?			CED	0	0	0	0	0	1	0
651	0	1	0	15	?	?	?	Poisoning	16.11	Exeat	1	0	0	0	0	0	0
652	1	0	0	45	Cultivateur	42	205	Shock	17.1.5	Décès	0	0	0	0	1	0	0
653	1	0	0	28	Etudiant	student	student	abdominal pain	17.1.7	Tr (HGE)	0	1	0	0	0	0	0
654	1	0	0	29	Aide-chauffeur	31	9140	Open wounds of head; neck; and trunk	16.6.1	Exeat	1	0	0	0	0	0	0
655	1	0	0	23	Cultivateur	42	205	Lumbago	13.3.3.3	Exeat	1	0	0	0	0	0	0
656	1	0	0	20	?	?	?	Fracture of radius and ulna	16.2.3.2	Décharge	0	0	1	0	0	0	0
657	0	1	0	36	Ménagère	6	4230	Superficial injury; contusion	16.8	Exeat	1	0	0	0	0	0	0
658	0	1	0	40	Ménagère	6	4230	Somatoform disorders	5.15.7	Exeat	1	0	0	0	0	0	0
659	1	0	0	45	Marin retraité	retired	retired	Acute myocardial infarction	7.2.3	Tr (Cardio)	0	1	0	0	0	0	0
660	1	0	0	50	Boucher	19	7810	Open wounds of head; neck; and trunk	16.6.1	Exeat	1	0	0	0	0	0	0
661	0	1	0	28	Etudiant	student	student	Open wounds of head; neck; and trunk	16.6.1	Exeat	1	0	0	0	0	0	0
662	1	0	0	37	Menuisier	28	6230	Fracture of upper limb	16.2.3	Tr (Bloc)	0	1	0	0	0	0	0
663	1	0	0	20	Etudiant	student	student	Open wounds of extremities	16.6.2	Exeat	1	0	0	0	0	0	0
664	1	0	0	31	Chauffeur	31	9140	Intracranial injury	16.4	Tr (Traumato)	0	1	0	0	0	0	0
665	0	0	1	1.5	?	?	?	Superficial injury; contusion	16.8	Exeat	1	0	0	0	0	0	0
666	1	0	0	52	Cultivateur	42	205	Occlusion of cerebral arteries	7.3.1.2	Tr (Neuro-psy)	0	1	0	0	0	0	0
667	1	0	0	26	?	?	?	Joint disorders and dislocations; trauma-related	16.1	Exeat	1	0	0	0	0	0	0
668	1	0	0	61	Cultivateur	42	205	Open wounds of extremities	16.6.2	Exeat	1	0	0	0	0	0	0
669	1	0	0	26	Pointeur	5	6040	Superficial injury; contusion	16.8	Exeat	1	0	0	0	0	0	0
670	0	0	1	7	Ecolier	student	student	injury and poisoning	16	Exeat	1	0	0	0	0	0	0
671	0	1	0	24	?	?	?	Menstrual disorders	10.3.5	Tr (Gynéco)	0	1	0	0	0	0	0
672	1	0	0	24	cycliste??	33	2720	Intracranial injury	16.4	Evasan (Tanà)	0	0	0	0	0	0	1
673	0	1	0	23	Ménagère	6	4230	Somatoform disorders	5.15.7	Tr (Neuro-psy)	0	1	0	0	0	0	0
674	1	0	0	25	Cultivateur	42	205	somatoform disorders	5.15.7	Décharge	0	0	1	0	0	0	0
675	1	0	0	43	?	?	?	Other intestinal obstruction	9.6.3.4	Tr (Bloc)	0	1	0	0	0	0	0
676	0	0	1	6	Ecolier	student	student	Fracture of tibia and fibula	16.2.4.1	Exeat	1	0	0	0	0	0	0
677	1	0	0	45	Chauffeur	31	9140	Hemorrhage of gastrointestinal tract	9.10.7	Tr (HGE)	0	1	0	0	0	0	0
678	0	1	0	25	Ménagère	6	4230	Acute myocardial infarction	7.2.3	Décharge	0	0	1	0	0	0	0
679	0	1	0	27	Ménagère	6	4230	Injury and poisoning	16	Tr (ORLO)	0	1	0	0	0	0	0
680	1	0	0	25	?	?	?	Intestinal obstruction without hernia	9.6.3	Tr (Bloc)	0	1	0	0	0	0	0
681	0	0	1	10	Ecolier	student	student	injury and poisoning	16	Tr (ORLO)	0	1	0	0	0	0	0
682	1	0	0	61	?	?	?	Hypertension with complications and secondary hypertension	7.1.2	Décharge	0	0	1	0	0	0	0
683	1	0	0	19	Lycéen	student	student	Superficial injury; contusion	16.8	Exeat	1	0	0	0	0	0	0
684	1	0	0	15	Ecolier	student	student	Superficial injury; contusion	16.8	Exeat	1	0	0	0	0	0	0
685	1	0	0	21	Commerçant	20	4950	Open wounds of head; neck; and trunk	16.6.1	Exeat	1	0	0	0	0	0	0
686	1	0	0	30	?	?	?	Inguinal hernia with obstruction or gangrene	9.5.1.1	Tr (Bloc)	0	1	0	0	0	0	0
687	0	1	0	21	Ménagère	6	4230	Other infections; including parasitic	1.4	Exeat	1	0	0	0	0	0	0
688	1	0	0	43	Pêcheur	23	6100	Open wounds of head; neck; and trunk	16.6.1	Exeat	0	1	0	0	0	0	0
689	1	0	0	58	Chef d'agence	84	20	Fracture of radius and ulna	16.2.3.2	Tr (Bloc)	0	1	0	0	0	0	0
690	0	1	0	46	Médecin	100	3060	Diabetes mellitus with complications	3.3	Tr (MI)	0	1	0	0	0	0	0
691	1	0	0	57	Médecin	100	3060	Coronary atherosclerosis and other heart disease	7.2.4	Décharge (Dr Fazy)	0	0	1	0	0	0	0
692	1	0	0	26	Tireur de pousse-pousse	15	9150	Bacterial infection	1.1	Décès	0	0	0	0	1	0	0
693	1	0	0	68	Gérant MAKI	84	20	Fracture of radius and ulna	16.2.3.2	Décharge	0	0	1	0	0	0	0
694	1	0	0	62	Chômeur	unemployed	unemployed	intestinal infection	9.1	Tr (MI)	0	1	0	0	0	0	0
695	1	0	0	41	Enseignant	84	2310	injury and poisoning	16	Exeat	1	0	0	0	0	0	0
696	1	0	0	26	Cultivateur	42	205	Appendicitis and other appendiceal conditions	9.6.1	Tr (Viscéral)	0	1	0	0	0	0	0
697	0	1	0	37	Commerçante	20	4950	HIV infection	1.3.1	Décharge	0	0	1	0	0	0	0
698	1	0	0	29	Chauffeur	31	9140	Injury and poisoning	16	Exeat	1	0	0	0	0	0	0
699	1	0	0	18	Mpanera	58	4965	Open wounds of head; neck; and trunk	16.6.1	Exeat	1	0	0	0	0	0	0
700	1	0	0	?	?	?	?	Other respiratory insufficiency	8.6.2	Décès	0	0	0	0	1	0	0
701	1	0	0	25	Maçon	20	6220	Other infections; including parasitic	1.4	Tr (MI)	0	1	0	0	0	0	0
702	1	0	0	60	?	?	?	cancer of breast	2.5	Décès	0	0	0	0	1	0	0
703	1	0	0	59	Mécanicien	36	7200	cancer of prostate	2.8.1	Décharge	0	0	1	0	0	0	0
704	1	0	0	52	Nomade/religion	unemployed	unemployed	Open wounds of head; neck; and trunk	16.6.1	Exeat	1	0	0	0	0	0	0
705	0	1	0	25	Cultivateur	42	205	Superficial injury; contusion	16.8	Exeat	1	0	0	0	0	0	0
706	1	0	0	29	Chauffeur	31	9140	Superficial injury; contusion	16.8	Décharge	0	0	1	0	0	0	0
707	0	1	0	54	Cultivateur	42	205	Diabetes mellitus with complications	3.3	Tr (MI)	0	1	0	0	0	0	0
708	0	1	0	54	Cultivateur	42	205	intestinal infection	9.1	Tr (MI)	0	1	0	0	0	0	0
709	1	0	0	25	Etudiant	student	student	Infectious and parasitic diseases	1	Tr (MI)	0	1	0	0	0	0	0
710	0	1	0	20	Ménagère	6	4230	Poisoning	16.11	Exeat	1	0	0	0	0	0	0
711	0	1	0	16	?	?	?	Inflammatory diseases of female pelvic organs	10.3.2	Tr (Gynéco)	0	1	0	0	0	0	0
712	0	0	1	0.666667	?	?	?	Intracranial injury	16.4	Décès	0	0	0	0	1	0	0
713	0	0	1	1.16667	?	?	?	injury and poisoning	16	Exeat	1	0	0	0	0	0	0
714	1	0	0	17	?	?	?			CED	0	0	0	0	0	1	0
715	0	0	1	6	Ecolier	student	student	Open wounds	16.6	Exeat	1	0	0	0	0	0	0
716	0	1	0	35	?	?	?	Alcohol-related disorders	5.11	Exeat	1	0	0	0	0	0	0
717	0	1	0	14	Ecolier	student	student	Hemorrhage during pregnancy; abruptio placenta; placenta previa	11.3.2	Tr (CME)	0	1	0	0	0	0	0
718	0	1	0	38	Ménagère	6	4230	Hypertension	7.1	Exeat	1	0	0	0	0	0	0
719	1	0	0	50	Cultivateur	42	205	Open wounds	16.6	Tr (Viscérale)	0	1	0	0	0	0	0
720	0	0	1	2	?	?	?	Open wounds of head; neck; and trunk	16.6.1	Exeat	1	0	0	0	0	0	0
721	1	0	0	34	Docker	32	9750	Intracranial injury	16.4	Tr (Traumato)	0	1	0	0	0	0	0
722	0	0	1	2	?	?	?	Residual codes; unclassified; all E codes	18	Exeat	1	0	0	0	0	0	0
723	0	1	0	33	?	?	?			CED	0	0	0	0	0	1	0
724	1	0	0	32	Maçon	20	6220	injury and poisoning	16	Exeat	1	0	0	0	0	0	0
725	1	0	0	22	Maçon	20	6220	Other gram negative septicemia	1.1.2.4	Tr (MI)	0	1	0	0	0	0	0
726	0	1	0	32	Cultivateur	42	205	Other and unspecified gastrointestinal disorders	9.12.3	Tr (Gynéco)	0	1	0	0	0	0	0
727	0	0	1	3	?	?	?	Acute bronchitis	8.1.4	Exeat	1	0	0	0	0	0	0
728	1	0	0	60	Avocat	99	2100	Open wounds of extremities	16.6.2	Exeat	1	0	0	0	0	0	0
729	1	0	0	27	Docker	32	9750	Open wounds of extremities	16.6.2	Evadé	0	0	0	1	0	0	0
730	0	1	0	25	Ménagère	6	4230	Abdominal pain	17.1.7	Exeat	1	0	0	0	0	0	0
731	1	0	0	45	Chauffeur	31	9140	Superficial injury; contusion	16.8	Exeat	1	0	0	0	0	0	0
732	1	0	0	23	Mécanicien	36	7200	Superficial injury; contusion	16.8	Exeat	1	0	0	0	0	0	0
733	1	0	0	21	?	?	?	intestinal infection	9.1	Exeat	1	0	0	0	0	0	0
734	1	0	0	27	Charpentier	28	6230	Open wounds of extremities	16.6.2	Exeat	1	0	0	0	0	0	0
735	1	0	0	56	Cultivateur	42	205	Open wounds of extremities	16.6.2	Décès	0	0	0	0	1	0	0
736	1	0	0	63	Militaire retraité	retired	retired	Acute cerebrovascular disease	7.3.1	Tr (Cardio)	0	1	0	0	0	0	0
737	0	1	0	44	Ménagère	6	4230			CED	0	0	0	0	0	1	0
738	0	1	0	22	Ménagère	6	4230	Calculus of bile duct	9.7.4	Tr (Viscéral)	0	1	0	0	0	0	0
739	0	1	0	20	Vendeur	20	4950	Somatoform disorders	5.15.7	Exeat	1	0	0	0	0	0	0
740	1	0	0	32	Boucher	19	7810	Open wounds of head; neck; and trunk	16.6.1	Exeat	1	0	0	0	0	0	0
741	0	1	0	19	Ménagère	6	4230	Preeclampsia and eclampsia	11.3.3.1	Tr (CME)	0	1	0	0	0	0	0
742	1	0	0	35	Commerçant	20	4950	poisoning by nonmedicinal substances	16.11.3	Exeat	1	0	0	0	0	0	0
743	0	1	0	35	Vendeur	20	4950	Superficial injury; contusion	16.8	Exeat	1	0	0	0	0	0	0
744	0	1	0	28	Cultivateur	42	205	Superficial injury; contusion	16.8	Exeat	1	0	0	0	0	0	0
745	0	1	0	59	Ménagère	6	4230	Other infections; including parasitic	1.4	Tr (MI)	0	1	0	0	0	0	0
746	0	1	0	22	Commerçant	20	4950	abdominal pain	17.1.7	Tr (MI)	0	1	0	0	0	0	0
747	1	0	0	47	Boucher	19	7810	Alcohol-related disorders	5.11	Tr (Neuro-psy)	0	1	0	0	0	0	0
748	1	0	0	42	Pêcheur	23	6100	Other upper respiratory disease	8.9	Décès	0	0	0	0	1	0	0
749	0	1	0	27	Cultivateur	42	205	Cancer of head and neck	2.11.1	Tr (ORLO)	0	1	0	0	0	0	0
750	0	1	0	34	?	?	?	Other fracture of lower limb	16.2.4.3	Décharge	0	0	1	0	0	0	0
751	0	1	0	19	Ménagère	6	4230	Poisoning by other medications and drugs	16.11.2	Exeat	1	0	0	0	0	0	0
752	0	0	1	9	Ecolier	student	student	Intracranial injury	16.4	Décharge	0	0	1	0	0	0	0
753	0	1	0	22	Ménagère	6	4230	injury and poisoning	16	Tr (CME)	0	1	0	0	0	0	0
754	0	0	1	0.5	?	?	?	Lower gastrointestinal disorders	9.6	Tr (Bloc)	0	1	0	0	0	0	0
755	1	0	0	45	?	?	?			Exeat	1	0	0	0	0	0	0
756	0	1	0	40	Vendeur	20	4950	Intracranial injury	16.4	Tr (ORLO)	0	1	0	0	0	0	0
757	0	1	0	28	?	?	?			CED	0	0	0	0	0	1	0
758	1	0	0	61	Charpentier	28	6230	Superficial injury; contusion	16.8	Exeat	1	0	0	0	0	0	0
759	1	0	0	22	Elève Pasteur	retired	retired	Calculus of kidney	10.1.5.1	Tr (Uro)	0	1	0	0	0	0	0
760	0	1	0	43	?	?	?	Injury and poisoning	16	?
761	1	0	0	32	Chauffeur	31	9140	Superficial injury; contusion	16.8	Exeat	1	0	0	0	0	0	0
762	1	0	0	25	Marin	46	9300	injury and poisoning	16	Exeat	1	0	0	0	0	0	0
763	1	0	0	60	Balayeur (CUM)	10	4250	Convulsions	6.4.2	Tr (Neuro-Psy)	0	1	0	0	0	0	0
764	1	0	0	60	?	?	?	Open wounds of extremities	16.6.2	Evadé	0	0	0	1	0	0	0
765	0	0	1	11	Ecolier	student	student	Open wounds of extremities	16.6.2	Exeat	1	0	0	0	0	0	0
766	0	1	0	20	Couturière	22	8350	Calculus of urinary tract	10.1.5	Décharge	0	0	1	0	0	0	0
767	1	0	0	17	?	?	?	poisoning by nonmedicinal substances	16.11.3	Exeat	1	0	0	0	0	0	0
768	1	0	0	23	Receveur bus	32	9120	Open wounds of head; neck; and trunk	16.6.1	Exeat	1	0	0	0	0	0	0
769	0	0	1	13	Ecolier	student	student	Fracture of lower limb	16.2.4	Tr (Traumato)	0	1	0	0	0	0	0
770	1	0	0	29	Commerçant	20	4950	Calculus of urinary tract	10.1.5	Décharge	0	0	1	0	0	0	0
771	1	0	0	19	Etudiant	student	student	Poisoning by other medications and drugs	16.11.2	Exeat	1	0	0	0	0	0	0
772	0	1	0	23	?	?	?	Acute myocardial infarction	7.2.3	Tr (Cardio)	0	1	0	0	0	0	0
773	1	0	0	23	Chômeur	unemployed	unemployed	Nonspecific chest pain	7.2.5	Tr (Cardio)	0	1	0	0	0	0	0
774	1	0	0	23	?	?	?	Nonspecific chest pain	7.2.5	Tr (Cardio)	0	1	0	0	0	0	0
775	1	0	0	34	Cultivateur	42	205	Fractures	16.2	Tr (Traumato)	0	1	0	0	0	0	0
776	1	0	0	33	Pêcheur	23	6100	Liver disease	9.8	Tr (HGE)	0	1	0	0	0	0	0
777	1	0	0	19	Commerçant	20	4950	Open wounds of head; neck; and trunk	16.6.1	Exeat	1	0	0	0	0	0	0
778	1	0	0	54	Gendarme	78	3850	Other ear and sense organ disorders	6.8.3	Tr (ORLO)	0	1	0	0	0	0	0
779	1	0	0	54	Gendarme	78	3850	Other ear and sense organ disorders	6.8.3	Tr (ORLO)	0	1	0	0	0	0	0
780	0	1	0	16	Vendeur	20	4950	Open wounds of head; neck; and trunk	16.6.1	Exeat	1	0	0	0	0	0	0
781	0	1	0	42	Commerçant	20	4950	Hypertension with complications and secondary hypertension	7.1.2	Tr (MI)	0	1	0	0	0	0	0
782	1	0	0	20	Cultivateur	42	205	Sexually transmitted infections (not HIV or hepatitis)	1.1.3	Exeat	1	0	0	0	0	0	0
783	1	0	0	70	Maçon	20	6220	Cardiac dysrhythmias	7.2.9	Décès	0	0	0	0	1	0	0
784	1	0	0	20	Gardien	39	3930	Open wounds of head; neck; and trunk	16.6.1	Exeat	1	0	0	0	0	0	0
785	1	0	0	26	Tireur de pousse-pousse	15	9150	Open wounds	16.6	Exeat	1	0	0	0	0	0	0
786	1	0	0	26	?	?	?	Superficial injury; contusion	16.8	Exeat	1	0	0	0	0	0	0
787	1	0	0	28	Cultivateur	42	205	Open wounds of extremities	16.6.2	Tr (Traumato)	0	1	0	0	0	0	0
788	1	0	0	25	?	?	?	Open wounds of head; neck; and trunk	16.6.1	Exeat	1	0	0	0	0	0	0
789	1	0	0	21	?	?	?	Alcohol-related disorders	5.11	Exeat	1	0	0	0	0	0	0
790	1	0	0	20	?	?	?	Open wounds of extremities	16.6.2	Exeat	1	0	0	0	0	0	0
791	1	0	0	23	Tireur de pousse-pousse	15	9150	Superficial injury; contusion	16.8	Exeat	1	0	0	0	0	0	0
792	0	1	0	35	?	?	?	Open wounds of extremities	16.6.2	Evadé	0	0	0	1	0	0	0
793	0	1	0	26	Barman	36	4040	Sexually transmitted infections (not HIV or hepatitis)	1.1.3	Tr (Gynéco)	0	1	0	0	0	0	0
794	0	0	1	8	Ecolier	student	student	Superficial injury; contusion	16.8	Exeat	1	0	0	0	0	0	0
795	0	1	0	18	Etudiant	student	student			CED	0	0	0	0	0	1	0
796	0	1	0	18	Etudiant	student	student	Infectious and parasitic diseases	1	Tr (Neuro-psy)	0	1	0	0	0	0	0
797	1	0	0	60	Cultivateur	42	205	Cardiomyopathy	7.2.2.1	Tr (Cardio)	0	1	0	0	0	0	0
798	0	1	0	20	Cultivateur	42	205	Ectopic pregnancy	11.3.1	Tr (CME)	0	1	0	0	0	0	0
799	0	0	1	7	?	?	?	Fracture of radius and ulna	16.2.3.2	Tr (Bloc)	0	1	0	0	0	0	0
800	0	1	0	25	?	?	?	Somatoform disorders	5.15.7	Exeat	1	0	0	0	0	0	0
801	0	1	0	25	Ménagère	6	4230	Somatoform disorders	5.15.7	Exeat	1	0	0	0	0	0	0
802	0	1	0	24	Ménagère	6	4230	Cardiac dysrhythmias	7.2.9	Tr (Cardio)	0	1	0	0	0	0	0
803	0	1	0	27	Cultivateur	42	205	cancer of bladder	2.9.1	Tr (Uro)	0	1	0	0	0	0	0
804	0	1	0	33	?	?	?	Other infections; including parasitic	1.4	Tr (MI)	0	1	0	0	0	0	0
805	0	0	1	14	Ecolier	student	student	Appendicitis and other appendiceal conditions	9.6.1	Tr (Viscéral)	0	1	0	0	0	0	0
806	0	1	0	36	Ménagère	6	4230	Intracranial injury	16.4	Exeat	1	0	0	0	0	0	0
807	0	1	0	35	Ménagère	6	4230	Intestinal infection	9.1	Tr (Gynéco)	0	1	0	0	0	0	0
808	0	1	0	21	Femme de ménage	6	4230	Superficial injury; contusion	16.8	Exeat	1	0	0	0	0	0	0
809	0	1	0	20	?	?	?	Infectious and parasitic diseases	1	Tr (MI)	0	1	0	0	0	0	0
810	0	1	0	34	Chômeur	unemployed	unemployed	Epilepsy	6.4.1	Tr (Neuro-psy)	0	1	0	0	0	0	0
811	0	1	0	26	?	?	?	Alcohol-related disorders	5.11	Exeat	1	0	0	0	0	0	0
812	0	1	0	38	Cultivateur	42	205	Cirrhosis of liver without mention of alcohol	9.8.2.1	Tr (HGE)	0	1	0	0	0	0	0
813	0	1	0	41	Vendeur	20	4950	Unspecified renal failure	10.1.2.2	Décès	0	0	0	0	1	0	0
814	0	1	0	34	Ouvrière	20	6260	Asthma	8.3	Tr (2P)	0	1	0	0	0	0	0
815	1	0	0	41	?	?	?	Other infections; including parasitic	1.4	Exeat	1	0	0	0	0	0	0
816	1	0	0	23	Etudiant	student	student	Open wounds of head; neck; and trunk	16.6.1	Exeat	1	0	0	0	0	0	0
817	0	1	0	50	Instituteur	84	2310	Other upper respiratory disease	8.9	Tr (Cardio)	0	1	0	0	0	0	0
818	0	0	1	5	Ecolier	student	student	Open wounds of head; neck; and trunk	16.6.1	Exeat	1	0	0	0	0	0	0
819	1	0	0	50	Responsable commerce HATIM	74	530	Sprains and strains	16.7	Exeat	1	0	0	0	0	0	0
820	0	0	1	14	Ecolier	student	student	Poisoning by other medications and drugs	16.11.2	Tr (Neuro-psy)	0	1	0	0	0	0	0
821	1	0	0	22	Pêcheur	23	6100	Superficial injury; contusion	16.8	Exeat	1	0	0	0	0	0	0
822	0	1	0	2.5	?	?	?	Open wounds of head; neck; and trunk	16.6.1	Exeat	1	0	0	0	0	0	0
823	0	0	1	2	?	?	?	Open wounds of head; neck; and trunk	16.6.1	Exeat	1	0	0	0	0	0	0
824	1	0	0	58	Ouvrier	20	6260	Intracranial injury	16.4	Exeat	1	0	0	0	0	0	0
825	0	1	0	18	Ménagère	6	4230	Superficial injury; contusion	16.8	Exeat	1	0	0	0	0	0	0
826	1	0	0	25	Charpentier	28	6230	Superficial injury; contusion	16.8	Exeat	1	0	0	0	0	0	0
827	0	0	1	11	Ecolier	student	student	Fracture of upper limb	16.2.3	Tr (Traumato)	0	1	0	0	0	0	0
828	0	0	1	1.66667	?	?	?	Superficial injury; contusion	16.8	Exeat	1	0	0	0	0	0	0
829	0	0	1	3	Ecolier	student	student	Open wounds of extremities	16.6.2	Exeat	1	0	0	0	0	0	0
830	0	1	0	21	Ménagère	6	4230	Intracranial injury	16.4	Exeat	1	0	0	0	0	0	0
831	0	1	0	33	Ménagère	6	4230	Appendicitis and other appendiceal conditions	9.6.1	Tr (Viscéral)	0	1	0	0	0	0	0
832	1	0	0	21	Etudiant	student	student	Open wounds of extremities	16.6.2	Exeat	1	0	0	0	0	0	0
833	0	0	1	1.5	?	?	?	Open wounds of head; neck; and trunk	16.6.1	Exeat	1	0	0	0	0	0	0
834	0	1	0	19	Ménagère	6	4230	Open wounds of extremities	16.6.2	Exeat	1	0	0	0	0	0	0
835	1	0	0	27	Etudiant	student	student	Intracranial injury	16.4	Exeat	1	0	0	0	0	0	0
836	0	1	0	34	?	?	?	Alcohol-related disorders	5.11	Exeat	1	0	0	0	0	0	0
837	0	1	0	73	?	?	?	Hepatitis	1.3.2	Tr (HGE)	0	1	0	0	0	0	0
838	1	0	0	24	Plongeur	1	4140	Esophageal disorders	9.4.1	Tr (HGE)	0	1	0	0	0	0	0
839	1	0	0	39	?	?	?	Gastrointestinal hemorrhage	9.10.0	Tr (HGE)	0	1	0	0	0	0	0
840	0	1	0	17	Couturière	22	8350	Epilepsy	6.4.1	Tr (Neuro-psy)	0	1	0	0	0	0	0
841	0	0	1	3	?	?	?	Inguinal hernia with obstruction or gangrene	9.5.1.1	Tr (Traumato)	0	1	0	0	0	0	0
842	1	0	0	28	Chauffeur	31	9140	Joint disorders and dislocations; trauma-related	16.1	Tr (Bloc)	0	1	0	0	0	0	0
843	0	1	0	36	Femme de ménage	6	4230	Diseases of the digestive system	9	Exeat	1	0	0	0	0	0	0
844	0	1	0	25	Etudiant	student	student	Superficial injury; contusion	16.8	Exeat	1	0	0	0	0	0	0
845	0	1	0	50	Marchande	20	4950	Open wounds of head; neck; and trunk	16.6.1	Exeat	1	0	0	0	0	0	0
846	0	1	0	52	Monitrice IFIRP	53	3420	Infectious and parasitic diseases	1	Tr (MI)	0	1	0	0	0	0	0
847	0	0	1	14	Ecolier	student	student	Superficial injury; contusion	16.8	Exeat	1	0	0	0	0	0	0
848	0	1	0	17	Ménagère	6	4230	Headache; including migraine	6.5	Tr (ORLO)	0	1	0	0	0	0	0
849	1	0	0	17	Vendeur	20	4950	Superficial injury; contusion	16.8	Exeat	1	0	0	0	0	0	0
850	1	0	0	15	?	?	?	Infectious and parasitic diseases	1	Décès	0	0	0	0	1	0	0
851	1	0	0	65	Chef mécanicien	62	7000	Hypertension with complications and secondary hypertension	7.1.2	Tr (MI)	0	1	0	0	0	0	0
852	1	0	0	65	Cultivateur	42	205	Diabetes with ketoacidosis or uncontrolled diabetes	3.3.1	Décès	0	0	0	0	1	0	0
853	1	0	0	15	Ecolier	student	student	Open wounds of extremities	16.6.2	Tr (Traumato)	0	1	0	0	0	0	0
854	0	1	0	16	?	?	?	Poisoning by other medications and drugs	16.11.2	Exeat	1	0	0	0	0	0	0
855	0	1	0	35	Patrimoine de lEtat	?	?	Syncope	17.1.1	Exeat	1	0	0	0	0	0	0
856	0	1	0	76	Pâtissier	40	4000	Pneumonia (except that caused by TB or STD)	8.1.1	Tr (Traumato)	0	1	0	0	0	0	0
857	0	1	0	76	Enseigannt	84	2310	Fracture of neck of femur (hip)	16.2.1	Tr (Traumato)	0	1	0	0	0	0	0
858	0	1	0	60	Tailleur	22	8350	Superficial injury; contusion	16.8	Exeat	1	0	0	0	0	0	0
859	0	1	0	26	?	?	?	Pleurisy; pneumothorax; pulmonary collapse	8.5	Tr (Gynéco)	0	1	0	0	0	0	0
860	0	0	1	2	?	?	?	Infectious and parasitic diseases	1	Tr (Péd)	0	1	0	0	0	0	0
861	0	1	0	28	Commerçant	20	4950	Open wounds of head; neck; and trunk	16.6.1	Exeat	1	0	0	0	0	0	0
862	1	0	0	43	Militaire	military	military	Open wounds of head; neck; and trunk	16.6.1	Exeat	1	0	0	0	0	0	0
863	0	1	0	76	Ménagère	6	4230	Gastrointestinal hemorrhage	9.10.0	Tr (HGE)	0	1	0	0	0	0	0
864	1	0	0	45	?	?	?	Intracranial injury	16.4	Exeat	1	0	0	0	0	0	0
865	1	0	0	65	Cultivateur	42	205	Retention of urine	10.1.8.2	Tr (Bloc)	0	1	0	0	0	0	0
866	0	1	0	59	Ménagère	6	4230	Acute myocardial infarction	7.2.3	Décès	0	0	0	0	1	0	0
867	0	0	1	11	Ecolier	student	student	Intracranial injury	16.4	Tr (Traumato)	0	1	0	0	0	0	0
868	0	1	0	22	Ménagère	6	4230	Superficial injury; contusion	16.8	Exeat	1	0	0	0	0	0	0
869	1	0	0	25	Menuisier	28	6230	Skull and face fractures	16.2.2	Tr (ORLO)	0	1	0	0	0	0	0
870	1	0	0	55	?	?	?	Heart failure	7.2.11.2	Tr (Cardio)	0	1	0	0	0	0	0
871	0	1	0	50	Pêcheur	23	6100	Hypertension with complications and secondary hypertension	7.1.2	Tr (Cardio)	0	1	0	0	0	0	0
872	1	0	0	45	Cultivateur	42	205	Hypertension	7.1	Tr (Cardio)	0	1	0	0	0	0	0
873	0	0	1	0.333333	?	?	?	Superficial injury; contusion	16.8	Exeat	1	0	0	0	0	0	0
874	1	0	0	29	Chauffeur	31	9140	Poisoning by other medications and drugs	16.11.2	Décharge	0	0	1	0	0	0	0
875	1	0	0	25	Docker	32	9750	Open wounds of extremities	16.6.2	Tr (Traumato)	0	1	0	0	0	0	0
876	1	0	0	24	Tireur de pousse-pousse	15	9150	Open wounds of head; neck; and trunk	16.6.1	Exeat	1	0	0	0	0	0	0
877	0	0	1	6	Ecolier	student	student	appendicitis and other appendiceal conditions	9.6.1	Tr (Traumato)	0	1	0	0	0	0	0
878	0	0	1	8	Ecolier	student	student	Acute appendicitis with abscess or peritonitis	9.6.1.1	Tr (Bloc)	0	1	0	0	0	0	0
879	1	0	0	19	Etudiant	student	student	Superficial injury; contusion	16.8	Exeat	1	0	0	0	0	0	0
880	1	0	0	40	?	?	?	gastroduodenal ulcer (except hemorrhage)	9.4.2	Exeat	1	0	0	0	0	0	0
881	0	1	0	33	Fournisseur	76	4850	Superficial injury; contusion	16.8	Tr (Traumato)	0	1	0	0	0	0	0
882	1	0	0	30	Chauffeur	31	9140	intestinal infection	9.1	Exeat	1	0	0	0	0	0	0
883	1	0	0	35	Commerçant	20	4950	Acute myocardial infarction	7.2.3	Tr (Cardio)	0	1	0	0	0	0	0
884	1	0	0	35	Journalier	75	2810	convulsions	6.4.2	Exeat	1	0	0	0	0	0	0
885	1	0	0	20	Mécanicien	36	7200	Superficial injury; contusion	16.8	Exeat	1	0	0	0	0	0	0
886	0	1	0	72	Ménagère	6	4230	Diabetes mellitus with complications	3.3	Décès	0	0	0	0	1	0	0
887	1	0	0	48	Cultivateur	42	205	Intracranial injury	16.4	Tr (Salfa)	0	1	0	0	0	0	0
888	0	0	1	9	Ecolier	student	student	Superficial injury; contusion	16.8	Exeat	1	0	0	0	0	0	0
889	1	0	0	70	?	?	?	Unspecified protein-calorie malnutrition	3.5.1	Exeat	1	0	0	0	0	0	0
890	0	0	1	10	Ecolier	student	student	Superficial injury; contusion	16.8	Exeat	1	0	0	0	0	0	0
891	0	0	1	1.25	?	?	?	injury and poisoning	16	Exeat	1	0	0	0	0	0	0
892	1	0	0	20	?	?	?	Intracranial injury	16.4	Décès	0	0	0	0	1	0	0
893	1	0	0	35	Tireur de pousse-pousse	15	9150	Open wounds of head; neck; and trunk	16.6.1	Exeat	1	0	0	0	0	0	0
894	1	0	0	31	Epicier	20	4950	Tuberculosis	1.1.1	TR (2P)	0	1	0	0	0	0	0
895	0	0	1	14	Ecolier	student	student	Other ear and sense organ disorders	6.8.3	Exeat	1	0	0	0	0	0	0
896	0	0	1	14	Ecolier	student	student	Infectious and parasitic diseases	1	Tr (Pédiatrie)	0	1	0	0	0	0	0
897	0	0	1	5	?	?	?	Injury and poisoning	16	Tr (Gynéco)	0	1	0	0	0	0	0
898	0	1	0	27	Cultivateur	42	205	Cancer of bladder	2.9.1	Décès	0	0	0	0	1	0	0
899	0	1	0	27	Cultivateur	42	205	Neoplasms of unspecified nature or uncertain behavior	2.14	Tr (Viscérale)	0	1	0	0	0	0	0
900	0	1	0	25	Vendeur	20	4950	Superficial injury; contusion	16.8	Exeat	1	0	0	0	0	0	0
901	0	1	0	50	?	?	?	Somatoform disorders	5.15.7	Tr (Neuro-Psy)	0	1	0	0	0	0	0
902	1	0	0	41	Chef de production SIB	57	7700	Injury and poisoning	16	Exeat	1	0	0	0	0	0	0
903	0	0	1	3.5	?	?	?	Superficial injury; contusion	16.8	Exeat	1	0	0	0	0	0	0
904	1	0	0	28	Chauffeur	31	9140	Open wounds of head; neck; and trunk	16.6.1	Exeat	1	0	0	0	0	0	0
905	0	0	1	1.5	?	?	?	injury and poisoning	16	Tr (ORLO)	0	1	0	0	0	0	0
906	0	1	0	17	Etudiant	student	student	Other gram negative septicemia	1.1.2.4	Tr (MI)	0	1	0	0	0	0	0
907	1	0	0	20	Tireur de pousse-pousse	15	9150	Open wounds	16.6	Décharge	0	0	1	0	0	0	0
908	1	0	0	22	Tireur de pousse-pousse	15	9150	Intracranial injury	16.4	Décharge	0	0	1	0	0	0	0
909	1	0	0	41	?	?	?	Other infections; including parasitic	1.4	Décès	0	0	0	0	1	0	0
910	0	1	0	23	Etudiant	student	student	Superficial injury; contusion	16.8	Exeat	1	0	0	0	0	0	0
911	1	0	0	30	Aide-chauffeur	31	9140	Other infections; including parasitic	1.4	Tr (MI)	0	1	0	0	0	0	0
912	0	0	1	12	Ecolier	student	student	Hemiplegia	6.3.1	Tr (Traumato)	0	1	0	0	0	0	0
913	0	1	0	18	?	?	?	Open wounds of head; neck; and trunk	16.6.1	Exeat	1	0	0	0	0	0	0
914	1	0	0	50	Consultant	?	?	Open wounds of head; neck; and trunk	16.6.1	Exeat	1	0	0	0	0	0	0
915	0	1	0	16	Ecolier	student	student	Poisoning by other medications and drugs	16.11.2	Exeat	1	0	0	0	0	0	0
916	0	0	1	5	Ecolier	student	student	Fracture of tibia and fibula	16.2.4.1	Décharge	0	0	1	0	0	0	0
917	1	0	0	41	Forestier	23	6120	Shock	17.1.5	Exeat	1	0	0	0	0	0	0
918	1	0	0	17	Ecolier	student	student	Intracranial injury	16.4	Tr (Traumato)	0	1	0	0	0	0	0
919	1	0	0	48	Pasteur	78	2040	Hypertensive heart and/or renal disease	7.1.2.1	Tr (Cardio)	0	1	0	0	0	0	0
920	1	0	0	15	Ecolier	student	student	Other fractures	16.2.5	Tr (Traumato)	0	1	0	0	0	0	0
921	1	0	0	21	Receveur	32	9120	Open wounds	16.6	Décharge	0	0	1	0	0	0	0
922	0	0	1	5	?	?	?	Open wounds of head; neck; and trunk	16.6.1	Exeat	1	0	0	0	0	0	0
923	1	0	0	35	Chauffeur	31	9140	Injury and poisoning	16	Exeat	1	0	0	0	0	0	0
924	1	0	0	18	Foot-balleur	33	2720	Joint disorders and dislocations; trauma-related	16.1	Décharge	0	0	1	0	0	0	0
925	0	0	1	10	Ecolier	student	student	Intracranial injury	16.4	Décès	0	0	0	0	1	0	0
926	1	0	0	26	Plongeur	1	4140	Open wounds of head; neck; and trunk	16.6.1	Tr (ORLO)	0	1	0	0	0	0	0
927	1	0	0	25	Cultivateur	42	205	Superficial injury; contusion	16.8	Exeat	1	0	0	0	0	0	0
928	1	0	0	56	Cultivateur	42	205	Skull and face fractures	16.2.2	Tr (ORLO)	0	1	0	0	0	0	0
929	1	0	0	30	Mécanicien	36	7200	Injury and poisoning	16	Exeat	1	0	0	0	0	0	0
930	0	0	1	12	Etudiant	student	student	Appendicitis and other appendiceal conditions	9.6.1	Tr (Viscérale)	0	1	0	0	0	0	0
931	1	0	0	21	Soudeur	34	8140	Intracranial injury	16.4	Tr (Traumato)	0	1	0	0	0	0	0
932	1	0	0	18	Ecolier	student	student	injury and poisoning	16	Décharge	0	0	1	0	0	0	0
933	1	0	0	18	Docker	32	9750	intestinal infection	9.1	Exeat	1	0	0	0	0	0	0
934	1	0	0	29	Cultivateur	42	205	Superficial injury; contusion	16.8	Décharge	0	0	1	0	0	0	0
935	0	0	1	3	?	?	?	Superficial injury; contusion	16.8	Exeat	1	0	0	0	0	0	0
936	1	0	0	18	Commerçant	20	4950	Other fracture of lower limb	16.2.4.3	Tr (Traumato)	0	1	0	0	0	0	0
937	1	0	0	17	Nomade/religion	unemployed	unemployed	Open wounds of head; neck; and trunk	16.6.1	Exeat	1	0	0	0	0	0	0
938	1	0	0	30	?	?	?	Open wounds of extremities	16.6.2	Exeat	1	0	0	0	0	0	0
939	1	0	0	23	?	?	?	Infectious and parasitic diseases	1	Tr (MI)	0	1	0	0	0	0	0
940	0	0	1	5	Ecolier	student	student	Superficial injury; contusion	16.8	Exeat	1	0	0	0	0	0	0
941	1	0	0	26	Ouvrier	20	6260	Pleurisy; pleural effusion	8.5.1	Tr (2P)	0	1	0	0	0	0	0
942	0	1	0	18	?	?	?	Poisoning by other medications and drugs	16.11.2	Exeat	1	0	0	0	0	0	0
943	1	0	0	78	Retraité	retired	retired	Fluid and electrolyte disorders	3.8	Tr (MI)	0	1	0	0	0	0	0
944	1	0	0	77	Commerçant	20	4950	Acute renal failure	10.1.2.1	Décès	0	0	0	0	1	0	0
945	1	0	0	77	Commerçant	20	4950	retention of urine	10.1.8.2	Tr (Uro)	0	1	0	0	0	0	0
946	1	0	0	54	Comptable	86	800	Other fracture of lower limb	16.2.4.3	Décharge	0	0	1	0	0	0	0
947	1	0	0	42	Mineur	40	6940	Pneumonia (except that caused by TB or STD)	8.1.1	Tr (2P)	0	1	0	0	0	0	0
948	1	0	0	73	Cultivateur	42	205	Other respiratory insufficiency	8.6.2	Tr (Cardio)	0	1	0	0	0	0	0
949	1	0	0	60	Charpentier	28	6230	Alcohol-related disorders	5.11	Exeat	1	0	0	0	0	0	0
950	1	0	0	78	Retraité	retired	retired	cancer of bladder	2.9.1	Exeat	1	0	0	0	0	0	0
951	1	0	0	78	?	?	?	Other asthma with acute exacerbation	8.3.2.3	Décharge	0	0	1	0	0	0	0
952	1	0	0	20	Maçon	20	6220	Intracranial injury	16.4	Tr (Traumato)	0	1	0	0	0	0	0
953	1	0	0	36	Gendarme	78	3850	Calculus of urinary tract	10.1.5	Tr (Uro)	0	1	0	0	0	0	0
954	1	0	0	25	Etudiant	student	student	Intracranial injury	16.4	Exeat	1	0	0	0	0	0	0
955	1	0	0	70	Cultivateur	42	205	injury and poisoning	16	Tr (Bloc)	0	1	0	0	0	0	0
956	1	0	0	88	Entrepreneur	77	740	Acute renal failure	10.1.2.1	Décès	0	0	0	0	1	0	0
957	1	0	0	19	Employé industrie de provende	7	6050	Open wounds	16.6	Exeat	1	0	0	0	0	0	0
958	0	1	0	73	Retraité	retired	retired	Other fluid and electrolyte disorders	3.8.5	Décharge	0	0	1	0	0	0	0
959	0	1	0	40	?	?	?	Convulsions	6.4.2	Tr (Neuro-Psy)	0	1	0	0	0	0	0
960	0	1	0	53	?	?	?	Intestinal infection	9.1	Exeat	1	0	0	0	0	0	0
961	0	1	0	65	?	?	?	heart Failure	7.2.11.2	Tr (Cardio)	0	1	0	0	0	0	0
962	0	1	0	22	Ménagère	6	4230	Infectious and parasitic diseases	1	Tr (MI)	0	1	0	0	0	0	0
963	1	0	0	52	Gardien SOCTAM	39	3930	Meningitis (except that caused by TB or STD)	6.1.1	Tr (Neuro)	0	1	0	0	0	0	0
964	1	0	0	47	Marin	46	9300	Joint disorders and dislocations; trauma-related	16.1	Tr (Traumato)	0	1	0	0	0	0	0
965	1	0	0	76	Sans travail	unemployed	unemployed	Other venous embolism and thrombosis	7.5.1.2	Décès	0	0	0	0	1	0	0
966	1	0	0	76	Sans travail	unemployed	unemployed	Acute cerebrovascular disease	7.3.1	Tr (Neuro-psy)	0	1	0	0	0	0	0
967	1	0	0	76	Chômeur	unemployed	unemployed	Tuberculosis	1.1.1	Tr (2P)	0	1	0	0	0	0	0
968	1	0	0	32	?	?	?	Open wounds of extremities	16.6.2	Tr (Traumato)	0	1	0	0	0	0	0
969	1	0	0	27	?	?	?	Meningitis (except that caused by TB or STD)	6.1.1	Tr (MI)	0	1	0	0	0	0	0
970	0	1	0	52	Commerçant	20	4950	Other and unspecified metabolic; nutritional; and endocrine disorders	3.11.3	Décharge	0	0	1	0	0	0	0
971	1	0	0	55	Gérant	84	20	Open wounds of extremities	16.6.2	Exeat	1	0	0	0	0	0	0
972	0	1	0	40	?	?	?	Somatoform disorders	5.15.7	Décharge	0	0	1	0	0	0	0
973	0	1	0	23	Etudiant	student	student	Poisoning by other medications and drugs	16.11.2	Tr (Neuro-psy)	0	1	0	0	0	0	0
974	1	0	0	30	Démarcheur	government	government	Open wounds	16.6	Tr (Traumato)	0	1	0	0	0	0	0
975	1	0	0	68	Cultivateur	42	205	Other and unspecified metabolic; nutritional; and endocrine disorders	3.11.3	Tr (MI)	0	1	0	0	0	0	0
976	0	1	0	23	?	?	?	Poisoning by other medications and drugs	16.11.2	Exeat	1	0	0	0	0	0	0
977	0	0	1	5	?	?	?	cancer of skin	2.4	Tr (Pédiatrie)	0	1	0	0	0	0	0
978	0	1	0	27	Etudiant	student	student	Poisoning by other medications and drugs	16.11.2	Exeat	1	0	0	0	0	0	0
979	1	0	0	20	Bricoleur	45	7340	Fracture of tibia and fibula	16.2.4.1	Tr (Bloc)	0	1	0	0	0	0	0
980	1	0	0	23	Barman	36	4040	Intracranial injury	16.4	Tr (Traumato)	0	1	0	0	0	0	0
981	1	0	0	18	Etudiant	student	student	calculus of kidney	10.1.5.1	Tr (Uro)	0	1	0	0	0	0	0
982	0	1	0	24	Ménagère	6	4230	Superficial injury; contusion	16.8	Exeat	1	0	0	0	0	0	0
983	1	0	0	58	?	?	?			CED	0	0	0	0	0	1	0
984	0	1	0	56	Ménagère	6	4230	Cardiac dysrhythmias	7.2.9	Tr (Cardio)	0	1	0	0	0	0	0
985	1	0	0	51	?	?	?	Acute myocardial infarction	7.2.3	Décharge	0	1	0	0	0	0	0
986	1	0	0	69	Retraité	retired	retired	convulsions	6.4.2	Tr (MI)	0	1	0	0	0	0	0
987	1	0	0	60	Pêcheur retraité	retired	retired	heart Failure	7.2.11.2	Exeat	1	0	0	0	0	0	0
988	1	0	0	18	Etudiant	student	student	injury and poisoning	16	Tr (Bloc)	0	1	0	0	0	0	0
989	0	1	0	60	Ménagère	6	4230	Hypertensive heart and/or renal disease	7.1.2.1	Tr (Cardio)	0	1	0	0	0	0	0
990	0	1	0	61	Ménagère	6	4230	Heart failure	7.2.11.2	Tr (Cardio)	0	1	0	0	0	0	0
991	0	1	0	61	Ménagère	6	4230	Diabetes mellitus with complications	3.3	Tr (MI)	0	1	0	0	0	0	0
992	0	1	0	61	Ménagère	6	4230	Cellulitis and abscess of leg	12.1.1.5	Tr (MI)	0	1	0	0	0	0	0
993	0	0	1	10	Ecolier	student	student	Open wounds of extremities	16.6.2	Exeat	1	0	0	0	0	0	0
994	0	1	0	62	Ménagère	6	4230	Other and unspecified metabolic; nutritional; and endocrine disorders	3.11.3	Tr (MI)	0	1	0	0	0	0	0
995	0	1	0	73	Ménagère	6	4230			CED	0	0	0	0	0	1	0
996	0	1	0	73	Ménagère	6	4230	cancer of uterus	2.6.1	Tr (Gynéco)	0	1	0	0	0	0	0
997	0	1	0	36	Ménagère	6	4230	Concussion	16.4.1	Exeat	1	0	0	0	0	0	0
998	1	0	0	67	Policier retraité	retired	retired	Superficial injury; contusion	16.8	Exeat	1	0	0	0	0	0	0
999	0	1	0	23	Ménagère	6	4230	Poisoning by other medications and drugs	16.11.2	Exeat	1	0	0	0	0	0	0
1000	0	1	0	19	Ecolier	student	student	Endometriosis	10.3.3	Tr (Gynéco)	0	1	0	0	0	0	0
1001	0	1	0	22	Ménagère	6	4230	Open wounds of extremities	16.6.2	Exeat	1	0	0	0	0	0	0
1002	0	1	0	21	Ménagère	6	4230	Somatoform disorders	5.15.7	Exeat	1	0	0	0	0	0	0
1003	0	0	1	6	Ecolier	student	student	Superficial injury; contusion	16.8	Exeat	1	0	0	0	0	0	0
1004	0	1	0	32	Ménagère	6	4230	Intracranial injury	16.4	Exeat	1	0	0	0	0	0	0
1005	0	1	0	23	Commerçant	20	4950	Superficial injury; contusion	16.8	Exeat	1	0	0	0	0	0	0
1006	1	0	0	28	Commerçant	20	4950	Other gram negative septicemia	1.1.2.4	Tr (MI)	0	1	0	0	0	0	0
1007	0	1	0	15	Ménagère	6	4230	Infectious and parasitic diseases	1	Décharge	0	0	1	0	0	0	0
1008	0	1	0	37	Commerçant	20	4950	Open wounds of head; neck; and trunk	16.6.1	Tr (Traumato)	0	1	0	0	0	0	0
1009	1	0	0	24	Boucher	19	7810	Open wounds of extremities	16.6.2	Exeat	1	0	0	0	0	0	0
1010	0	1	0	21	Etudiant	student	student	malaise and fatigue	17.1.8	Tr (MI)	0	1	0	0	0	0	0
1011	0	0	1	14	?	?	?	Retention of urine	10.1.8.2	Tr (Traumato)	0	1	0	0	0	0	0
1012	0	0	1	5	Ecolier	student	student	Open wounds of extremities	16.6.2	Exeat	1	0	0	0	0	0	0
1013	0	1	0	34	Ménagère	6	4230	Ectopic pregnancy	11.3.1	Tr (Gynéco)	0	1	0	0	0	0	0
1014	1	0	0	28	Coordinateur	60	5940	Superficial injury; contusion	16.8	Exeat	1	0	0	0	0	0	0
1015	1	0	0	17	Coordinateur	60	5940	Fracture of upper limb	16.2.3	Exeat	1	0	0	0	0	0	0
1016	1	0	0	24	Etudiant	student	student	Open wounds of extremities	16.6.2	Exeat	1	0	0	0	0	0	0
1017	0	1	0	18	Ménagère	6	4230	Other infections; including parasitic	1.4	Tr (MI)	0	1	0	0	0	0	0
1018	1	0	0	?	?	?	?			CED	0	0	0	0	0	1	0
1019	0	1	0	?	Ménagère	6	4230	Convulsions	6.4.2	Tr (Neuro-psy)	0	1	0	0	0	0	0
1020	0	1	0	70	Ménagère	6	4230	Hypertension with complications and secondary hypertension	7.1.2	Tr (Cardio)	0	1	0	0	0	0	0
1021	0	1	0	18	Femme de ménage	6	4230	Somatoform disorders	5.15.7	Exeat	1	0	0	0	0	0	0
1022	0	1	0	32	Ménagère	6	4230	Intestinal infection	9.1	Exeat	1	0	0	0	0	0	0
1023	0	1	0	53	Caissière BFV	17	4720	Acute cerebrovascular disease	7.3.1	Evasan Tanà	0	0	0	0	0	0	1
1024	0	1	0	53	Caissière BFV	17	4720	mood disorders	5.8	Tr (Neuro-psy)	0	1	0	0	0	0	0
1025	0	1	0	17	Ecolier	student	student	Injury and poisoning	16	Exeat	1	0	0	0	0	0	0
1026	0	1	0	35	?	?	?	Superficial injury; contusion	16.8	Exeat	1	0	0	0	0	0	0
1027	0	1	0	21	Commerçant	20	4950	Intestinal obstruction without hernia	9.6.3	Tr (Viscéral)	0	1	0	0	0	0	0
1028	0	1	0	20	Commerçant	20	4950	Superficial injury; contusion	16.8	Tr (Traumato)	0	1	0	0	0	0	0
1029	0	1	0	35	?	?	?	Epilepsy	6.4.1	Tr (Neuro-Psy)	0	1	0	0	0	0	0
1030	0	1	0	22	Ménagère	6	4230	Cardiomyopathy	7.2.2.1	Décharge	0	0	1	0	0	0	0
1031	0	1	0	38	Ménagère	6	4230	Hemorrhage of gastrointestinal tract	9.10.7	Tr (ORLO)	0	1	0	0	0	0	0
1032	0	1	0	19	Etudiant	student	student	Somatoform disorders	5.15.7	Exeat	1	0	0	0	0	0	0
1033	0	1	0	29	?	?	?			CED	0	0	0	0	0	1	0
1034	0	1	0	20	Ecolier	student	student	Poisoning by other medications and drugs	16.11.2	Exeat	1	0	0	0	0	0	0
1035	1	0	0	27	Chauffeur	31	9140	Open wounds of head; neck; and trunk	16.6.1	Exeat	1	0	0	0	0	0	0
1036	1	0	0	24	Ecolier	student	student	Lower gastrointestinal disorders	9.6	Exeat	1	0	0	0	0	0	0
1037	0	0	1	7	Ecolier	student	student	Superficial injury; contusion	16.8	Exeat	1	0	0	0	0	0	0
1038	0	1	0	28	Ménagère	6	4230	Somatoform disorders	5.15.7	Exeat	1	0	0	0	0	0	0
1039	0	1	0	19	Etudiant	student	student	allergic reactions	17.1.9	Exeat	1	0	0	0	0	0	0
1040	0	1	0	31	Infirmière	84	3255	Superficial injury; contusion	16.8	Exeat	1	0	0	0	0	0	0
1041	0	1	0	16	?	?	?	Intestinal infection	9.1	Exeat	1	0	0	0	0	0	0
1042	0	1	0	28	Ménagère	6	4230	injury and poisoning	16	Tr (CME)	0	1	0	0	0	0	0
1043	0	1	0	28	Femme de ménage	6	4230	Ovarian cyst	10.3.6	Tr (Gynéco)	0	1	0	0	0	0	0
1044	1	0	0	88	Décorateur	69	2630	Superficial injury; contusion	16.8	Exeat	1	0	0	0	0	0	0
1045	1	0	0	36	Pêcheur	23	6100	Joint disorders and dislocations; trauma-related	16.1	Exeat	1	0	0	0	0	0	0
1046	0	1	0	17	Femme de ménage	6	4230	convulsions	6.4.2	Tr (Neuro-psy)	0	1	0	0	0	0	0
1047	0	1	0	24	Ménagère	6	4230	Open wounds of extremities	16.6.2	Exeat	1	0	0	0	0	0	0
1048	0	1	0	38	Ménagère	6	4230	Somatoform disorders	5.15.7	Exeat	1	0	0	0	0	0	0
1049	0	1	0	15	Etudiant	student	student	Open wounds	16.6	Exeat	1	0	0	0	0	0	0
1050	1	0	0	19	Agent Aqualma	34	4760	Burns	16.9	Tr (ORLO)	0	1	0	0	0	0	0
1051	1	0	0	21	Etudiant	student	student	Other gram negative septicemia	1.1.2.4	Décharge	0	0	1	0	0	0	0
1052	0	1	0	24	?	?	?	Intestinal infection	9.1	Tr (MI)	0	1	0	0	0	0	0
1053	0	0	1	6	Etudiant	student	student	Open wounds	16.6	Exeat	1	0	0	0	0	0	0
1054	1	0	0	17	Commerçant	20	4950	injury and poisoning	16	Exeat	1	0	0	0	0	0	0
1055	1	0	0	17	?	?	?	poisoning by nonmedicinal substances	16.11.3	Tr (Neuro-psy)	0	1	0	0	0	0	0
1056	1	0	0	47	Commerçant	20	4950	Intracranial hemorrhage	7.3.1.1	Décès	0	0	0	0	1	0	0
1057	1	0	0	47	Marin	46	9300	Inguinal hernia	9.5.1	Tr (Viscéral)	0	1	0	0	0	0	0
1058	1	0	0	31	?	?	?	Open wounds of extremities	16.6.2	Tr (Bloc)	0	1	0	0	0	0	0
1059	0	1	0	39	Ménagère	6	4230	Fracture of upper limb	16.2.3	Décharge	0	0	1	0	0	0	0
1060	1	0	0	30	Chômeur	unemployed	unemployed	Schizophrenia and other psychotic disorders	5.10.0	Evadé	0	0	0	1	0	0	0
1061	1	0	0	7	Ecolier	student	student	Superficial injury; contusion	16.8	Exeat	1	0	0	0	0	0	0
1062	0	0	1	5	Ecolier	student	student	Superficial injury; contusion	16.8	Exeat	1	0	0	0	0	0	0
1063	0	0	1	6	Ecolier	student	student	Fracture of lower limb	16.2.4	Décharge	0	0	1	0	0	0	0
1064	1	0	0	23	Etudiant	student	student	Fracture of tibia and fibula	16.2.4.1	Exeat	1	0	0	0	0	0	0
1065	1	0	0	23	Etudiant	student	student	Fracture of tibia and fibula	16.2.4.1	Tr (Traumato)	0	1	0	0	0	0	0
1066	0	1	0	21	Ménagère	6	4230	Somatoform disorders	5.15.7	Exeat	1	0	0	0	0	0	0
1067	0	0	1	10	Ecolier	student	student	Injury and poisoning	16	Exeat	1	0	0	0	0	0	0
1068	1	0	0	27	Agent de sécurité	39	3930	Alcohol-related disorders	5.11	Exeat	1	0	0	0	0	0	0
1069	1	0	0	52	Cultivateur	42	205	Diabetes mellitus with complications	3.3	Tr (MI)	0	1	0	0	0	0	0
1070	0	0	1	4	?	?	?	Open wounds of head; neck; and trunk	16.6.1	Evadé	0	0	0	1	0	0	0
1071	1	0	0	20	?	?	?	Other gram negative septicemia	1.1.2.4	TR (MI)	0	1	0	0	0	0	0
1072	0	1	0	60	Femme de ménage	6	4230	Fracture of humerus	16.2.3.1	Tr (Traumato)	0	1	0	0	0	0	0
1073	0	1	0	42	?	?	?	Superficial injury; contusion	16.8	Exeat	1	0	0	0	0	0	0
1074	0	0	1	13	Ecolier	student	student	Fracture of radius and ulna	16.2.3.2	Exeat	1	0	0	0	0	0	0
1075	1	0	0	24	Etudiant	student	student	Burns	16.9	Décharge	0	0	1	0	0	0	0
1076	0	1	0	49	?	?	?	Intracranial injury	16.4	Exeat	1	0	0	0	0	0	0
1077	1	0	0	22	Ecolier	student	student	Superficial injury; contusion	16.8	Exeat	1	0	0	0	0	0	0
1078	1	0	0	23	Gardien	39	3930	Intracranial injury	16.4	Exeat	1	0	0	0	0	0	0
1079	0	0	1	8	Ecolier	student	student	Open wounds of head; neck; and trunk	16.6.1	Exeat	1	0	0	0	0	0	0
1080	1	0	0	32	?	?	?	intestinal infection	9.1	Exeat	1	0	0	0	0	0	0
1081	1	0	0	25	Pêcheur	23	6100	injury and poisoning	16	Décès	0	0	0	0	1	0	0
1082	1	0	0	22	Pompiste GALANA	53	9650	Superficial injury; contusion	16.8	Exeat	1	0	0	0	0	0	0
1083	0	0	1	1.5	?	?	?	Superficial injury; contusion	16.8	Tr (Traumato)	0	1	0	0	0	0	0
1084	1	0	0	35	Cultivateur	42	205	Gastritis and duodenitis	9.4.3	Exeat	1	0	0	0	0	0	0
1085	1	0	0	58	Policier	78	3850	Pneumonia (except that caused by TB or STD)	8.1.1	Tr (2P)	0	1	0	0	0	0	0
1086	1	0	0	32	Commerçant	20	4950	Joint disorders and dislocations; trauma-related	16.1	Décharge	0	0	1	0	0	0	0
1087	1	0	0	32	Vendeur	20	4950	Open wounds	16.6	Evadé	0	0	0	1	0	0	0
1088	1	0	0	37	?	?	?	Intestinal infection	9.1	Tr (MI)	0	1	0	0	0	0	0
1089	1	0	0	32	?	?	?	Injury and poisoning	16	Décharge	0	0	1	0	0	0	0
1090	1	0	0	29	Menuisier	28	6230	injury and poisoning	16	Décharge	0	0	1	0	0	0	0
1091	1	0	0	18	Etudiant	student	student	Open wounds of head; neck; and trunk	16.6.1	Exeat	1	0	0	0	0	0	0
1092	0	0	1	6	Ecolier	student	student	Fracture of radius and ulna	16.2.3.2	Tr (Traumato)	0	1	0	0	0	0	0
1093	1	0	0	35	Marin	46	9300	Open wounds	16.6	Exeat	1	0	0	0	0	0	0
1094	1	0	0	?	?	?	?	Other infections; including parasitic	1.4	Evadé	0	0	0	1	0	0	0
1095	1	0	0	37	Chauffeur	31	9140	Superficial injury; contusion	16.8	Exeat	1	0	0	0	0	0	0
1096	1	0	0	24	Lycéenne	student	student	Migraine	6.5.1	Tr (Neuro-Psy)	0	1	0	0	0	0	0
1097	0	1	0	26	?	?	?	Nonrheumatic mitral valve disorders	7.2.1.2	Tr (Cardio)	0	1	0	0	0	0	0
1098	0	1	0	80	Ménagère	6	4230	Pneumonia (except that caused by TB or STD)	8.1.1	Décès	0	0	0	0	1	0	0
1099	0	1	0	36	?	?	?	Other inflammatory diseases of female pelvic organs	10.3.2.4	Exeat	1	0	0	0	0	0	0
1100	1	0	0	19	Etudiant	student	student	Open wounds of head; neck; and trunk	16.6.1	Exeat	1	0	0	0	0	0	0
1101	1	0	0	39	?	?	?	Occlusion of cerebral arteries	7.3.1.2	Tr (Neuro-psy)	0	1	0	0	0	0	0
1102	1	0	0	35	Chauffeur	31	9140	Open wounds of head; neck; and trunk	16.6.1	Exeat	1	0	0	0	0	0	0
1103	1	0	0	21	Etudiant	student	student	Open wounds of extremities	16.6.2	Décharge	0	0	1	0	0	0	0
1104	1	0	0	20	Commerçant	20	4950	Intracranial injury	16.4	Exeat	1	0	0	0	0	0	0
1105	0	1	0	21	Ménagère	6	4230	Superficial injury; contusion	16.8	Exeat	1	0	0	0	0	0	0
1106	0	1	0	49	Coututière	22	8350	Sexually transmitted infections (not HIV or hepatitis)	1.1.3	Tr (Gynéco)	0	1	0	0	0	0	0
1107	0	1	0	82	Cultivateur	42	205	Pleurisy; pneumothorax; pulmonary collapse	8.5	Tr (2P)	0	1	0	0	0	0	0
1108	0	0	1	10	Ecolier	student	student	Superficial injury; contusion	16.8	Exeat	1	0	0	0	0	0	0
1109	1	0	0	17	Ecolier	student	student	calculus of kidney	10.1.5.1	Décharge	0	0	1	0	0	0	0
1110	0	1	0	40	Marchand ambulant	20	4950	Asthma	8.3	Tr (2P)	0	1	0	0	0	0	0
1111	1	0	0	62	Ingénieur	93	1530			CED	0	0	0	0	0	1	0
1112	0	1	0	23	Maki Compagnie	?	?	Superficial injury; contusion	16.8	Exeat	1	0	0	0	0	0	0
1113	0	0	1	8	Ecolier	student	student	injury and poisoning	16	Tr (Traumato)	0	1	0	0	0	0	0
1114	0	1	0	?	Ménagère	6	4230	Hypertension	7.1	Tr (Cardio)	0	1	0	0	0	0	0
1115	1	0	0	68	?	?	?	Fracture of lower limb	16.2.4	Tr (Traumato)	0	1	0	0	0	0	0
1116	0	0	1	5	Ecolier	student	student	Superficial injury; contusion	16.8	Exeat	1	0	0	0	0	0	0
1117	1	0	0	73	Marin	46	9300	Superficial injury; contusion	16.8	Exeat	1	0	0	0	0	0	0
1118	0	1	0	17	Etudiant	student	student	Somatoform disorders	5.15.7	Tr (Neuro-psy)	0	1	0	0	0	0	0
1119	1	0	0	40	Boulanger	11	4020	Open wounds of extremities	16.6.2	Exeat	1	0	0	0	0	0	0
1120	1	0	0	66	?	?	?	Gastrointestinal hemorrhage	9.10.0	Evasan (Tanà)	0	0	0	0	0	0	1
1121	1	0	0	27	Ingénieur	93	1530	Superficial injury; contusion	16.8	Exeat	1	0	0	0	0	0	0
1122	1	0	0	20	Planton	military	military	Poisoning by other medications and drugs	16.11.2	Exeat	1	0	0	0	0	0	0
1123	0	1	0	41	Secrétaire	53	5700	Superficial injury; contusion	16.8	Exeat	1	0	0	0	0	0	0
1124	1	0	0	30	Commerçant	20	4950	Intracranial injury	16.4	Tr (Traumato)	0	1	0	0	0	0	0
1125	0	1	0	16	Collégien	student	student	Superficial injury; contusion	16.8	Exeat	1	0	0	0	0	0	0
1126	1	0	0	30	Infirmier	84	3255	Intestinal infection	9.1	Tr (MI)	0	1	0	0	0	0	0
1127	1	0	0	19	Aide-chauffeur	31	9140	Open wounds of extremities	16.6.2	Exeat	1	0	0	0	0	0	0
1128	0	1	0	20	Ecolier	student	student	Poisoning by other medications and drugs	16.11.2	Exeat	1	0	0	0	0	0	0
1129	0	0	1	13	Ecolier	student	student	Superficial injury; contusion	16.8	Exeat	1	0	0	0	0	0	0
1130	1	0	0	34	Technicien	40	7630	Superficial injury; contusion	16.8	Exeat	1	0	0	0	0	0	0
1131	0	1	0	49	Ménagère	6	4230	cancer of uterus	2.6.1	Tr (Gynéco)	0	1	0	0	0	0	0
1132	1	0	0	53	Agriculteur	42	205	chronic renal failure	10.1.3	Décharge	0	0	1	0	0	0	0
1133	1	0	0	20	Commerçant	20	4950	Intracranial injury	16.4	Décharge	0	0	1	0	0	0	0
1134	1	0	0	38	Commerçant	20	4950	injury and poisoning	16	Exeat	1	0	0	0	0	0	0
1135	1	0	0	24	Menuisier	28	6230	Fracture of upper limb	16.2.3	Tr (Traumato)	0	1	0	0	0	0	0
1136	1	0	0	25	Ecolier	student	student	Calculus of kidney	10.1.5.1	Tr (Bloc)	0	1	0	0	0	0	0
1137	1	0	0	29	Chauffeur	31	9140	Superficial injury; contusion	16.8	Exeat	1	0	0	0	0	0	0
1138	0	1	0	44	Cultivateur	42	205	Lumbago	13.3.3.3	Tr (MI)	0	1	0	0	0	0	0
1139	1	0	0	?	?	?	?			CED	0	0	0	0	0	1	0
1140	1	0	0	?	?	?	?	Alcohol-related disorders	5.11	Evadé	0	0	0	1	0	0	0
1141	1	0	0	?	?	?	?	Joint disorders and dislocations; trauma-related	16.1	Evadé	0	0	0	1	0	0	0
1142	1	0	0	?	?	?	?	Open wounds of extremities	16.6.2	Evadé	0	0	0	1	0	0	0
1143	1	0	0	?	?	?	?	injury and poisoning	16	Evadé	0	0	0	1	0	0	0
1144	1	0	0	?	?	?	?	Alcohol-related disorders	5.11	Exeat	1	0	0	0	0	0	0
1145	1	0	0	30	?	?	?	Intracranial injury	16.4	Exeat	1	0	0	0	0	0	0
1146	1	0	0	?	?	?	?	Injury and poisoning	16	Décès	0	0	0	0	1	0	0
1147	0	0	1	11	?	?	?	Superficial injury; contusion	16.8	Exeat	1	0	0	0	0	0	0
1148	0	1	0	?	?	?	?	diabetes with ketoacidosis or uncontrolled diabetes	3.3.1	Tr (MI)	0	1	0	0	0	0	0
1149	0	1	0	56	Institutrice	84	2310	Fracture of humerus	16.2.3.1	Tr (Traumato)	0	1	0	0	0	0	0
1150	1	0	0	23	Collecteur	7	6050	Superficial injury; contusion	16.8	Exeat	1	0	0	0	0	0	0
1151	1	0	0	23	Manœuvre	21	9620	Superficial injury; contusion	16.8	Exeat	1	0	0	0	0	0	0
1152	1	0	0	19	?	?	?	Fracture of humerus	16.2.3.1	Décharge	0	0	1	0	0	0	0
1153	1	0	0	18	Etudiant	student	student	Alcohol-related disorders	5.11	Exeat	1	0	0	0	0	0	0
1154	0	1	0	50	?	?	?	Intracranial hemorrhage	7.3.1.1	Décès	0	0	0	0	1	0	0
1155	0	1	0	27	?	?	?	injury and poisoning	16	Décharge	0	0	1	0	0	0	0
1156	0	1	0	15	Etudiant	student	student	Poisoning by other medications and drugs	16.11.2	Exeat	1	0	0	0	0	0	0
1157	1	0	0	56	Militaire	military	military	Symptoms; signs; and ill-defined conditions	17.1	Tr (HGE)	0	1	0	0	0	0	0
1158	1	0	0	30	?	?	?	Fracture of radius and ulna	16.2.3.2	Décharge	0	0	1	0	0	0	0
1159	0	1	0	77	Ménagère	6	4230	convulsions	6.4.2	Tr (Neuro-psy)	0	1	0	0	0	0	0
1160	1	0	0	26	?	?	?	Alcohol-related disorders	5.11	Exeat	1	0	0	0	0	0	0
1161	1	0	0	23	Agent de sécurité	39	3930	Calculus of kidney	10.1.5.1	Tr (Uro)	0	1	0	0	0	0	0
1162	1	0	0	21	?	?	?			CED	0	0	0	0	0	1	0
1163	1	0	0	37	Agent de sécurité	39	3930	Superficial injury; contusion	16.8	Exeat	1	0	0	0	0	0	0
1164	0	0	1	9	Ecolier	student	student	Intracranial injury	16.4	Exeat	1	0	0	0	0	0	0
1165	0	0	1	2.5	?	?	?	Superficial injury; contusion	16.8	Exeat	1	0	0	0	0	0	0
1166	1	0	0	26	Entrepreneur	77	740	Open wounds of head; neck; and trunk	16.6.1	Exeat	1	0	0	0	0	0	0
1167	0	1	0	26	Vendeur	20	4950	injury and poisoning	16	Tr (Gynéco)	0	1	0	0	0	0	0
1168	0	1	0	15	Ecolier	student	student	somatoform disorders	5.15.7	Exeat	1	0	0	0	0	0	0
1169	1	0	0	28	Commerçant	20	4950	Superficial injury; contusion	16.8	Exeat	1	0	0	0	0	0	0
1170	1	0	0	37	Cultivateur	42	205	Open wounds of head; neck; and trunk	16.6.1	Tr (Traumato)	0	1	0	0	0	0	0
1171	0	1	0	50	Ménagère	6	4230	Diseases of the respiratory system	8	Décès	0	0	0	0	1	0	0
1172	0	1	0	52	Blanchisseuse	12	8300	Pleurisy; pleural effusion	8.5.1	Tr (2P)	0	1	0	0	0	0	0
1173	0	1	0	53	Vendeur	20	4950	Superficial injury; contusion	16.8	Exeat	1	0	0	0	0	0	0
1174	0	1	0	52	Ménagère	6	4230	Transient cerebral ischemia	7.3.4	Décharge	0	0	1	0	0	0	0
1175	0	1	0	58	Conseil pédagogique	76	2000	Hypertension	7.1	Décharge	0	0	1	0	0	0	0
1176	0	1	0	71	?	?	?	Gastritis and duodenitis	9.4.3	Tr (HGE)	0	1	0	0	0	0	0
1177	1	0	0	25	Agent de sécurité	39	3930	Open wounds of extremities	16.6.2	Exeat	1	0	0	0	0	0	0
1178	1	0	0	61	Chauffeur	31	9140	Hypertension with complications and secondary hypertension	7.1.2	Tr (Cardio)	0	1	0	0	0	0	0
1179	1	0	0	47	Président secteur	92	10	Fracture of upper limb	16.2.3	Tr (Traumato)	0	1	0	0	0	0	0
1180	1	0	0	46	Cultivateur	42	205	Tuberculosis	1.1.1	Tr (2P)	0	1	0	0	0	0	0
1181	1	0	0	46	Cultivateur	42	205	Hyperplasia of prostate	10.2.1	Tr (Uro)	0	1	0	0	0	0	0
1182	1	0	0	32	Chauffeur	31	9140	convulsions	6.4.2	Décharge	0	0	1	0	0	0	0
1183	1	0	0	25	Prédicateur Islamique	78	2040	Intestinal infection	9.1	Tr (MI)	0	1	0	0	0	0	0
1184	1	0	0	60	Cultivateur	42	205	Sexually transmitted infections (not HIV or hepatitis)	1.1.3	Décès	0	0	0	0	1	0	0
1185	1	0	0	36	Gendarme	78	3850	Superficial injury; contusion	16.8	Exeat	1	0	0	0	0	0	0
1186	1	0	0	33	Marin	46	9300	Other infections; including parasitic	1.4	Exeat	1	0	0	0	0	0	0
1187	1	0	0	17	Etudiant	student	student	Appendicitis and other appendiceal conditions	9.6.1	Tr (Viscéral)	0	1	0	0	0	0	0
1188	1	0	0	50	?	?	?	Open wounds of head; neck; and trunk	16.6.1	Exeat	1	0	0	0	0	0	0
1189	1	0	0	50	?	?	?	Intracranial hemorrhage	7.3.1.1	Décès	0	0	0	0	1	0	0
1190	1	0	0	32	Plongeur	1	4140	Superficial injury; contusion	16.8	Exeat	1	0	0	0	0	0	0
1191	0	0	1	13	Ecolier	student	student	Intracranial injury	16.4	Tr (Traumato)	0	1	0	0	0	0	0
1192	1	0	0	32	Marin	46	9300	Poisoning by other medications and drugs	16.11.2	Tr (Neuro-psy)	0	1	0	0	0	0	0
1193	1	0	0	35	Gendarme	78	3850	Superficial injury; contusion	16.8	Evadé	0	0	0	1	0	0	0
1194	1	0	0	40	Artiste	58	2600	Hemorrhage of gastrointestinal tract	9.10.7	Tr (HGE)	0	1	0	0	0	0	0
1195	1	0	0	67	Surveillant retraité	retired	retired	Melena	9.10.2	Tr (HGE)	0	1	0	0	0	0	0
1196	1	0	0	40	Docker	32	9750	Joint disorders and dislocations; trauma-related	16.1	Exeat	1	0	0	0	0	0	0
1197	1	0	0	65	Agent retraité Somapêche	retired	retired	Genitourinary symptoms and ill-defined conditions	10.1.8	Tr (Uro)	0	1	0	0	0	0	0
1198	1	0	0	39	Cultivateur	42	205	retention of urine	10.1.8.2	Tr (Uro)	0	1	0	0	0	0	0
1199	0	0	1	9	Ecolier	student	student	Inguinal hernia with obstruction or gangrene	9.5.1.1	Tr (Traumato)	0	1	0	0	0	0	0
1200	1	0	0	55	Chauffeur	31	9140	Alcohol-related disorders	5.11	Tr (Neuro-psy)	0	1	0	0	0	0	0
1201	1	0	0	25	Aide-chauffeur	31	9140	Burns	16.9	Tr (Traumato)	0	1	0	0	0	0	0
1202	1	0	0	62	Retraité	retired	retired			CED	0	0	0	0	0	1	0
1203	1	0	0	38	Soudeur	34	8140	Pneumonia (except that caused by TB or STD)	8.1.1	TR (2P)	0	1	0	0	0	0	0
1204	1	0	0	37	Docker	32	9750	Other ear and sense organ disorders	6.8.3	Décharge	0	0	1	0	0	0	0
1205	1	0	0	27	Mpanera	58	4965	Other esophageal disorders	9.4.1.2	Evadé	0	0	0	1	0	0	0
1206	1	0	0	40	Agent de sécurité	39	3930	Inguinal hernia with obstruction or gangrene	9.5.1.1	Tr (Bloc)	0	1	0	0	0	0	0
1207	1	0	0	38	Commerçant	20	4950	Open wounds of extremities	16.6.2	Exeat	1	0	0	0	0	0	0
1208	0	0	1	12	Ecolier	student	student	Intracranial injury	16.4	Tr (Bloc)	0	1	0	0	0	0	0
1209	1	0	0	17	Ecolier	student	student	Open wounds of head; neck; and trunk	16.6.1	Exeat	1	0	0	0	0	0	0
1210	1	0	0	27	Chômeur	unemployed	unemployed	Superficial injury; contusion	16.8	Evadé	0	0	0	1	0	0	0
1211	1	0	0	30	?	?	?	Malaise and fatigue	17.1.8	Exeat	1	0	0	0	0	0	0
1212	1	0	0	40	?	?	?	Superficial injury; contusion	16.8	Exeat	1	0	0	0	0	0	0
1213	1	0	0	23	Pêcheur	23	6100	injury and poisoning	16	Exeat	1	0	0	0	0	0	0
1214	1	0	0	43	Gardien	39	3930	Intracranial injury	16.4	Exeat	1	0	0	0	0	0	0
1215	0	0	1	8	Ecolier	student	student	Intracranial injury	16.4	Exeat	1	0	0	0	0	0	0
1216	1	0	0	39	Chômeur	unemployed	unemployed	Peritonitis and intestinal abscess	9.6.6	Décharge	0	0	1	0	0	0	0
1217	1	0	0	31	Docker	32	9750	Retention of urine	10.1.8.2	Tr (Uro)	0	1	0	0	0	0	0
1218	1	0	0	21	Agent Somapëche	23	6100	Poisoning	16.11	Tr (Neuro-psy)	0	1	0	0	0	0	0
1219	1	0	0	32	Cultivateur	42	205	Acute pancreatitis	9.9.1	Tr (HGE)	0	1	0	0	0	0	0
1220	1	0	0	17	Vendeur	20	4950	Superficial injury; contusion	16.8	Exeat	1	0	0	0	0	0	0
1221	1	0	0	28	Vendeur	20	4950	Open wounds of extremities	16.6.2	Exeat	1	0	0	0	0	0	0
1222	1	0	0	27	?	?	?	Cancer of head and neck	2.11.1	Exeat	1	0	0	0	0	0	0
1223	1	0	0	61	Pêcheur	23	6100	Alcohol-related disorders	5.11	Exeat	1	0	0	0	0	0	0
1224	1	0	0	22	Vendeur	20	4950	Mood disorders	5.8	Tr (Neuro-Psy)	0	1	0	0	0	0	0
1225	1	0	0	16	Cultivateur	42	205	Intracranial injury	16.4	Tr (Traumato)	0	1	0	0	0	0	0
1226	1	0	0	35	?	?	?	Open wounds of head; neck; and trunk	16.6.1	Exeat	1	0	0	0	0	0	0
1227	1	0	0	42	Tireur de pousse-pousse	15	9150	Fracture of tibia and fibula	16.2.4.1	Tr (Bloc)	0	1	0	0	0	0	0
1228	1	0	0	55	?	?	?	Acute upper respiratory infections of multiple or unspecified sites	8.1.5.1	Tr (MI)	0	1	0	0	0	0	0
1229	1	0	0	24	?	?	?	Open wounds of head; neck; and trunk	16.6.1	Exeat	1	0	0	0	0	0	0
1230	1	0	0	43	Conseiller agricole	66	6010	Superficial injury; contusion	16.8	Décharge	0	0	1	0	0	0	0
1231	1	0	0	37	Docker	32	9750	Alcohol-related disorders	5.11	Décharge	0	0	1	0	0	0	0
1232	1	0	0	69	?	?	?	Peritonitis and intestinal abscess	9.6.6	Tr (Bloc)	0	1	0	0	0	0	0
1233	1	0	0	69	?	?	?	Intracranial injury	16.4	Tr (ORLO)	0	1	0	0	0	0	0
1234	1	0	0	30	Employé savonnerie DRAMCO	57	8640	Intracranial injury	16.4	Tr (Bloc)	0	1	0	0	0	0	0
1235	1	0	0	38	Ouvrier	20	6260	Superficial injury; contusion	16.8	Décharge	0	0	1	0	0	0	0
1236	1	0	0	39	Cultivateur	42	205	Fracture of ribs; closed	16.2.5.2	Exeat	1	0	0	0	0	0	0
1237	1	0	0	63	?	?	?	Inguinal hernia with obstruction or gangrene	9.5.1.1	Tr (Bloc)	0	1	0	0	0	0	0
1238	1	0	0	54	Militaire	military	military	Open wounds of head; neck; and trunk	16.6.1	Exeat	1	0	0	0	0	0	0
1239	1	0	0	48	Instituteur	84	2310	Cirrhosis of liver without mention of alcohol	9.8.2.1	Décès	0	0	0	0	1	0	0
1240	1	0	0	30	Vendeur	20	4950	Open wounds of extremities	16.6.2	Exeat	1	0	0	0	0	0	0
1241	1	0	0	47	Tireur de pousse-pousse	15	9150	Superficial injury; contusion	16.8	Exeat	1	0	0	0	0	0	0
1242	1	0	0	40	Chauffeur	31	9140	Intracranial injury	16.4	Tr (Traumato)	0	1	0	0	0	0	0
1243	1	0	0	34	?	?	?	Intracranial injury	16.4	Exeat	1	0	0	0	0	0	0
1244	1	0	0	35	?	?	?	Open wounds of extremities	16.6.2	Exeat	1	0	0	0	0	0	0
1245	1	0	0	30	Charpentier	28	6230	Open wounds	16.6	Exeat	1	0	0	0	0	0	0
1246	1	0	0	47	Cultivateur	42	205	Peritonitis and intestinal abscess	9.6.6	Tr (Bloc)	0	1	0	0	0	0	0
1247	1	0	0	23	Maçon	20	6220			CED	0	0	0	0	0	1	0
1248	1	0	0	30	Tireur de pousse-pousse	15	9150	Superficial injury; contusion	16.8	Exeat	1	0	0	0	0	0	0
1249	1	0	0	23	Vendeur	20	4950	Superficial injury; contusion	16.8	Exeat	1	0	0	0	0	0	0
1250	1	0	0	45	Chauffeur	31	9140	Fracture of humerus	16.2.3.1	Tr (Traumato)	0	1	0	0	0	0	0
1251	1	0	0	58	Cultivateur	42	205	Paralysis	6.3	Décès	0	0	0	0	1	0	0
1252	1	0	0	37	?	?	?	Open wounds of head; neck; and trunk	16.6.1	Exeat	1	0	0	0	0	0	0
1253	1	0	0	73	?	?	?	Skull and face fractures	16.2.2	Exeat	1	0	0	0	0	0	0
1254	1	0	0	24	?	?	?	Superficial injury; contusion	16.8	Exeat	1	0	0	0	0	0	0
1255	1	0	0	32	Commerçant	20	4950	Open wounds of head; neck; and trunk	16.6.1	Exeat	1	0	0	0	0	0	0
1256	1	0	0	17	Ecolier	student	student	Superficial injury; contusion	16.8	Exeat	1	0	0	0	0	0	0
1257	1	0	0	55	Gardien	39	3930	Pleurisy; pleural effusion	8.5.1	Tr (MI)	0	1	0	0	0	0	0
1258	1	0	0	35	Coiffeur	27	4510	Poisoning	16.11	Décharge	0	0	1	0	0	0	0
1259	0	1	0	60	Femme de chambre	6	4230	Superficial injury; contusion	16.8	Tr (Traumato)	0	1	0	0	0	0	0
1260	0	1	0	52	?	?	?			CED	0	0	0	0	0	1	0
1261	0	1	0	?	?	?	?	Open wounds of head; neck; and trunk	16.6.1	Evadé	0	0	0	1	0	0	0
1262	1	0	0	18	Cultivateur	42	205	Open wounds of extremities	16.6.2	Exeat	1	0	0	0	0	0	0
1263	1	0	0	47	Marin	46	9300	Cellulitis and abscess	12.1.1	Décès	0	0	0	0	1	0	0
1264	1	0	0	31	Ouvrier à bois	20	6260	Open wounds of extremities	16.6.2	Tr (Traumato)	0	1	0	0	0	0	0
1265	1	0	0	20	Etudiant	student	student	intestinal infection	9.1	Tr (MI)	0	1	0	0	0	0	0
1266	1	0	0	53	Enseignant	84	2310	Tuberculosis	1.1.1	Décès	0	0	0	0	1	0	0
1267	1	0	0	53	Enseignant	84	2310	Hydronephrosis	10.1.6.1	Tr (MI)	0	1	0	0	0	0	0
1268	1	0	0	25	Mécanicien	36	7200	injury and poisoning	16	Exeat	1	0	0	0	0	0	0
1269	0	0	1	9	Ecolier	student	student	Superficial injury; contusion	16.8	Exeat	1	0	0	0	0	0	0
1270	0	1	0	18	Ménagère	6	4230	Injury and poisoning	16	Exeat	1	0	0	0	0	0	0
1271	1	0	0	67	Assistant judiciaire	70	2145	Mood disorders	5.8	Tr (Neuro-Psy)	0	1	0	0	0	0	0
1272	1	0	0	48	?	?	?			CED	0	0	0	0	0	1	0
1273	1	0	0	40	Agent transitaire	52	5500	injury and poisoning	16	Tr (Traumato)	0	1	0	0	0	0	0
1274	1	0	0	44	?	?	?	Superficial injury; contusion	16.8	Tr (Traumato)	0	1	0	0	0	0	0
1275	0	0	1	12	?	?	?	Superficial injury; contusion	16.8	Exeat	1	0	0	0	0	0	0
1276	0	0	1	6	Ecolier	student	student	Concussion	16.4.1	Exeat	1	0	0	0	0	0	0
1277	0	1	0	60	Retraité	retired	retired	Open wounds of extremities	16.6.2	Evadé	0	0	0	1	0	0	0
1278	1	0	0	30	Brocanteur	70	5200	Superficial injury; contusion	16.8	Exeat	1	0	0	0	0	0	0
1279	0	0	1	11	Ecolier	student	student	Constipation	9.12.1	Exeat	1	0	0	0	0	0	0
1280	0	1	0	11	Ecolier	student	student	Intestinal infection	9.1	Tr (Péd)	0	1	0	0	0	0	0
1281	1	0	0	30	Cultivateur	42	205	Ascites	9.8.2.3	Tr (HGE)	0	1	0	0	0	0	0
1282	1	0	0	26	Chauffeur	31	9140	Superficial injury; contusion	16.8	Décharge	0	0	1	0	0	0	0
1283	0	1	0	35	Ménagère	6	4230	Appendicitis and other appendiceal conditions	9.6.1	Tr (Bloc)	0	1	0	0	0	0	0
1284	0	1	0	19	Ménagère	6	4230	Superficial injury; contusion	16.8	Exeat	1	0	0	0	0	0	0
1285	1	0	0	30	Vendeur	20	4950	Open wounds of extremities	16.6.2	Exeat	1	0	0	0	0	0	0
1286	1	0	0	26	Collecteur de poissons	23	6100	Fracture of tibia and fibula	16.2.4.1	Tr (Traumato)	0	1	0	0	0	0	0
1287	1	0	0	32	?	?	?	Injury and poisoning	16	Exeat	1	0	0	0	0	0	0
1288	1	0	0	20	Etudiant	student	student	Appendicitis and other appendiceal conditions	9.6.1	Tr (Viscéral)	0	1	0	0	0	0	0
1289	0	1	0	44	Couturière	22	8350	Other gram negative septicemia	1.1.2.4	Tr (MI)	0	1	0	0	0	0	0
1290	1	0	0	25	Personnel SITAM	32	3655	Superficial injury; contusion	16.8	Exeat	1	0	0	0	0	0	0
1291	1	0	0	36	Menuisier	28	6230	Open wounds of extremities	16.6.2	Exeat	1	0	0	0	0	0	0
1292	1	0	0	19	Etudiant	student	student	Pleurisy; pleural effusion	8.5.1	Tr (2P)	0	1	0	0	0	0	0
1293	0	0	1	7	Ecolier	student	student	Superficial injury; contusion	16.8	Exeat	1	0	0	0	0	0	0
1294	0	0	1	0.333333	?	?	?	Lower gastrointestinal disorders	9.6	Tr (Bloc)	0	1	0	0	0	0	0
1295	1	0	0	6	Ecolier	student	student	Superficial injury; contusion	16.8	Exeat	1	0	0	0	0	0	0
1296	0	0	1	10	Ecolier	student	student	Superficial injury; contusion	16.8	Exeat	1	0	0	0	0	0	0
1297	1	0	0	23	?	?	?	Open wounds of extremities	16.6.2	Exeat	1	0	0	0	0	0	0
1298	1	0	0	21	Agent Aqualma	34	4760	Open wounds of head; neck; and trunk	16.6.1	Exeat	1	0	0	0	0	0	0
1299	1	0	0	62	Cultivateur	42	205	retention of urine	10.1.8.2	Tr (Uro)	0	1	0	0	0	0	0
1300	1	0	0	?	Vulgarisateur	56	2860	Alcohol-related disorders	5.11	Décharge	0	0	1	0	0	0	0
1301	1	0	0	35	Boucher	19	7810	Superficial injury; contusion	16.8	Exeat	1	0	0	0	0	0	0
1302	1	0	0	23	Boucher	19	7810	Open wounds of head; neck; and trunk	16.6.1	Exeat	1	0	0	0	0	0	0
1303	1	0	0	44	Militaire	military	military	Open wounds of head; neck; and trunk	16.6.1	Exeat	1	0	0	0	0	0	0
1304	1	0	0	32	Chômeur	unemployed	unemployed	Alcohol-related disorders	5.11	Exeat	1	0	0	0	0	0	0
1305	1	0	0	19	Etudiant	student	student	Other gram negative septicemia	1.1.2.4	Tr (MI)	0	1	0	0	0	0	0
1306	1	0	0	42	?	?	?	Tuberculosis	1.1.1	Tr (2P)	0	1	0	0	0	0	0
1307	0	1	0	36	Cultivateur	42	205	Superficial injury; contusion	16.8	Exeat	1	0	0	0	0	0	0
1308	0	1	0	37	Ménagère	6	4230	calculus of kidney	10.1.5.1	Tr (Uro)	0	1	0	0	0	0	0
1309	0	1	0	45	Ménagère	6	4230	Poisoning	16.11	Exeat	1	0	0	0	0	0	0
1310	0	1	0	45	Vendeur	20	4950	Lower gastrointestinal disorders	9.6	Exeat	1	0	0	0	0	0	0
1311	0	0	1	12	Ecolier	student	student	injury and poisoning	16	Exeat	1	0	0	0	0	0	0
1312	0	1	0	32	Ménagère	6	4230	Other gram negative septicemia	1.1.2.4	Tr (MI)	0	1	0	0	0	0	0
1313	1	0	0	25	Charpentier	28	6230	Superficial injury; contusion	16.8	Exeat	1	0	0	0	0	0	0
1314	1	0	0	33	Collecteur	7	6050	Open wounds	16.6	Exeat	1	0	0	0	0	0	0
1315	1	0	0	25	Directeur de travaux	84	20	Intestinal infection	9.1	Exeat	1	0	0	0	0	0	0
1316	1	0	0	55	?	?	?	calculus of kidney	10.1.5.1	Tr (Uro)	0	1	0	0	0	0	0
1317	0	1	0	19	?	?	?	Superficial injury; contusion	16.8	Exeat	1	0	0	0	0	0	0
1318	0	1	0	19	Ménagère	6	4230	Poisoning by other medications and drugs	16.11.2	Exeat	1	0	0	0	0	0	0
1319	0	1	0	24	Serveur	25	4110	Poisoning by other medications and drugs	16.11.2	Exeat	1	0	0	0	0	0	0
1320	0	1	0	23	Etudiant	student	student	Poisoning	16.11	Décharge	0	0	1	0	0	0	0
1321	0	0	1	3	?	?	?	Intracranial injury	16.4	Exeat	1	0	0	0	0	0	0
1322	1	0	0	26	?	?	?	Open wounds of head; neck; and trunk	16.6.1	Exeat	1	0	0	0	0	0	0
1323	0	1	0	36	Ménagère	6	4230	Hypertension	7.1	Tr (Cardio)	0	1	0	0	0	0	0
1324	0	0	1	13	?	?	?			CED	0	0	0	0	0	1	0
1325	0	1	0	14	?	?	?	Open wounds of extremities	16.6.2	Exeat	1	0	0	0	0	0	0
1326	1	0	0	16	?	?	?	Injury and poisoning	16	Tr (Traumato)	0	1	0	0	0	0	0
1327	1	0	0	29	Voyageur	?	?	Other infections; including parasitic	1.4	Exeat	1	0	0	0	0	0	0
1328	0	1	0	28	?	?	?	Open wounds of head; neck; and trunk	16.6.1	Exeat	1	0	0	0	0	0	0
1329	1	0	0	23	Plongeur	1	4140	Open wounds of extremities	16.6.2	Exeat	1	0	0	0	0	0	0
1330	1	0	0	60	Musicien	44	2750	Fracture of radius and ulna	16.2.3.2	Exeat	1	0	0	0	0	0	0
1331	1	0	0	31	Cultivateur	42	205	Open wounds of head; neck; and trunk	16.6.1	Tr (Traumato)	0	1	0	0	0	0	0
1332	1	0	0	38	?	?	?	Open wounds of head; neck; and trunk	16.6.1	Exeat	1	0	0	0	0	0	0
1333	0	1	0	54	Mnagère	6	4230	Coma; stupor; and brain damage	6.6	Décharge	0	0	1	0	0	0	0
1334	0	1	0	78	Ménagère	6	4230	Congestive heart failure	7.2.11.1	Décharge	0	0	1	0	0	0	0
1335	1	0	0	45	Transporteur	38	9130	Tuberculosis	1.1.1	Décès	0	0	0	0	1	0	0
1336	1	0	0	45	Transporteur	38	9130	heart Failure	7.2.11.2	Tr (Cardio)	0	1	0	0	0	0	0
1337	0	1	0	80	Cultivateur	42	205	Paralysis	6.3	Tr (Neuro-Psy)	0	1	0	0	0	0	0
1338	0	1	0	33	Serveur	25	4110	Infectious and parasitic diseases	1	Tr (MI)	0	1	0	0	0	0	0
1339	0	1	0	35	?	?	?	Other inflammatory diseases of female pelvic organs	10.3.2.4	Tr (Gynéco)	0	1	0	0	0	0	0
1340	1	0	0	40	Boucher (Détenu)	19	7810	Ear conditions	6.8	Tr (ORLO)	0	1	0	0	0	0	0
1341	0	1	0	18	Etudiant	student	student	convulsions	6.4.2	Tr (MI)	0	1	0	0	0	0	0
1342	1	0	0	34	Vendeur	20	4950	Convulsions	6.4.2	Tr (Neuro-Psy)	0	1	0	0	0	0	0
1343	1	0	0	19	Ecolier	student	student	Open wounds of extremities	16.6.2	Exeat	1	0	0	0	0	0	0
1344	1	0	0	28	?	?	?	Superficial injury; contusion	16.8	Décharge	0	0	1	0	0	0	0
1345	1	0	0	50	Cultivateur	42	205	Inguinal hernia with obstruction or gangrene	9.5.1.1	Tr (Bloc)	0	1	0	0	0	0	0
1346	1	0	0	17	Etudiant	student	student	Open wounds of extremities	16.6.2	Tr (Traumato)	0	1	0	0	0	0	0
1347	0	1	0	51	Entrepreneur	77	740	injury and poisoning	16	Exeat	1	0	0	0	0	0	0
1348	0	1	0	59	?	?	?	Diseases of the digestive system	9	Tr (MI)	0	1	0	0	0	0	0
1349	1	0	0	45	Conducteur de machine	28	7950	Pleurisy; pneumothorax; pulmonary collapse	8.5	Tr (2P)	0	1	0	0	0	0	0
1350	1	0	0	71	Agent eaux et forêts retraité	retired	retired	Shock	17.1.5	Décès	0	0	0	0	1	0	0
1351	1	0	0	33	Livreur Gastro Pizza	15	9150	Open wounds of head; neck; and trunk	16.6.1	Exeat	1	0	0	0	0	0	0
1352	0	1	0	70	Commerçant	20	4950	Paralysis	6.3	Tr (Neuro-psy)	0	1	0	0	0	0	0
1353	0	1	0	46	Instituteur	84	2310	Intracranial hemorrhage	7.3.1.1	Décès	0	0	0	0	1	0	0
1354	0	1	0	21	Etudiant	student	student	Asthma	8.3	Exeat	1	0	0	0	0	0	0
1355	0	0	1	8	Etudiant	student	student	Superficial injury; contusion	16.8	Exeat	1	0	0	0	0	0	0
1356	0	1	0	20	Ménagère	6	4230	Cellulitis and abscess	12.1.1	Tr (ORLO)	0	1	0	0	0	0	0
1357	1	0	0	19	?	?	?	Inguinal hernia with obstruction or gangrene	9.5.1.1	Tr (Bloc)	0	1	0	0	0	0	0
1358	0	1	0	67	Ménagère	6	4230	Asthma	8.3	Tr (2P)	0	1	0	0	0	0	0
1359	1	0	0	51	Boulanger	11	4020	Intracranial hemorrhage	7.3.1.1	Décès	0	0	0	0	1	0	0
1360	1	0	0	63	Cultivateur	42	205	Diseases of the respiratory system	8	Tr (2P)	0	1	0	0	0	0	0
1361	0	1	0	60	Ménagère	6	4230	Tuberculosis	1.1.1	Tr (2P)	0	1	0	0	0	0	0
1362	0	1	0	76	?	?	?	Hypertension with complications and secondary hypertension	7.1.2	Décharge	0	0	1	0	0	0	0
1363	0	1	0	80	Directrice école Bourhani	92	230	Unspecified septicemia	1.1.2.6	Décès	0	0	0	0	1	0	0
1364	0	1	0	30	Ménagère	6	4230	Burns	16.9	Tr (Traumato)	0	1	0	0	0	0	0
1365	0	1	0	52	Employé Réfrigépêche	23	6100	Fracture of lower limb	16.2.4	Tr (Traumato)	0	1	0	0	0	0	0
1366	0	1	0	79	Ménagère	6	4230			CED	0	0	0	0	0	1	0
1367	0	1	0	50	Nomade/religion	unemployed	unemployed	Open wounds of head; neck; and trunk	16.6.1	Exeat	1	0	0	0	0	0	0
1368	0	0	1	11	Ecolier	student	student	Injury and poisoning	16	Tr (Traumato)	0	1	0	0	0	0	0
1369	1	0	0	25	Etudiant	student	student	Other gram negative septicemia	1.1.2.4	Tr (MI)	0	1	0	0	0	0	0
1370	1	0	0	22	?	?	?	Other gram negative septicemia	1.1.2.4	Exeat	1	0	0	0	0	0	0
1371	0	0	1	2	?	?	?	Inguinal hernia with obstruction or gangrene	9.5.1.1	Tr (Traumato)	0	1	0	0	0	0	0
1372	1	0	0	30	?	?	?	Open wounds	16.6	Tr (Traumato)	0	1	0	0	0	0	0
1373	0	1	0	15	Etudiant	student	student	mood disorders	5.8	Exeat	1	0	0	0	0	0	0
1374	1	0	0	35	Agent de sécurité	39	3930	Poisoning by psychotropic agents	16.11.1	Exeat	1	0	0	0	0	0	0
1375	0	0	1	9	Ecolier	student	student	Intracranial injury	16.4	Tr (Traumato)	0	1	0	0	0	0	0
1376	0	1	0	10	?	?	?	Intracranial injury	16.4	Exeat	1	0	0	0	0	0	0
1377	1	0	0	58	Tradipraticien	77	3540	Pneumonia (except that caused by TB or STD)	8.1.1	Tr (Cardio)	0	1	0	0	0	0	0
1378	0	1	0	39	Capitonneur	61	9310	Tuberculosis	1.1.1	Tr (2P)	0	1	0	0	0	0	0
1379	1	0	0	25	Chômeur	unemployed	unemployed	Other gram negative septicemia	1.1.2.4	Tr (MI)	0	1	0	0	0	0	0
1380	0	1	0	30	?	?	?	allergic reactions	17.1.9	Exeat	1	0	0	0	0	0	0
1381	0	1	0	47	Commerçant	20	4950	Diseases of the respiratory system	8	TR (2P)	0	1	0	0	0	0	0
1382	0	1	0	19	Ménagère	6	4230	Inflammatory diseases of female pelvic organs	10.3.2	Tr ( Gynéco)	0	1	0	0	0	0	0
1383	0	1	0	8	Ecolier	student	student	Poisoning	16.11	Exeat	1	0	0	0	0	0	0
1384	0	1	0	18	Ménagère	6	4230	Poisoning by other medications and drugs	16.11.2	Exeat	1	0	0	0	0	0	0
1385	0	1	0	42	Ménagère	6	4230	Poisoning	16.11	Exeat	1	0	0	0	0	0	0
1386	0	1	0	33	Vendeur	20	4950	Poisoning by other medications and drugs	16.11.2	Exeat	1	0	0	0	0	0	0
1387	1	0	0	38	Ménagère	6	4230	Open wounds of head; neck; and trunk	16.6.1	Exeat	1	0	0	0	0	0	0
1388	0	1	0	41	?	?	?	Hypertension	7.1	Tr (Cardio)	0	1	0	0	0	0	0
1389	0	1	0	23	Etudiant	student	student	Intestinal infection	9.1	Tr (HGE)	0	1	0	0	0	0	0
1390	1	0	0	29	?	?	?	Open wounds of head; neck; and trunk	16.6.1	Décharge	0	0	1	0	0	0	0
1391	1	0	0	48	Policier	78	3850	Open wounds of extremities	16.6.2	Exeat	1	0	0	0	0	0	0
1392	0	1	0	26	Ménagère	6	4230	Poisoning by nonmedicinal substances	16.11.3	Exeat	1	0	0	0	0	0	0
1393	0	1	0	29	Policier	78	3850	Endocrine; nutritional; and metabolic diseases and immunity disorders	3	Exeat	1	0	0	0	0	0	0
1394	0	1	0	24	?	?	?	mood disorders	5.8	Décharge	0	0	1	0	0	0	0
1395	0	1	0	20	Lycéenne	student	student	Lumbago	13.3.3.3	Exeat	1	0	0	0	0	0	0
1396	0	1	0	40	?	?	?	Superficial injury; contusion	16.8	Exeat	1	0	0	0	0	0	0
1397	1	0	0	33	Soudeur	34	8140	Infectious and parasitic diseases	1	Tr (MI)	0	1	0	0	0	0	0
1398	0	1	0	40	Ménagère	6	4230	Ectopic pregnancy	11.3.1	Tr (Gynéco)	0	1	0	0	0	0	0
1399	0	1	0	27	Ménagère	6	4230	Poisoning by other medications and drugs	16.11.2	Exeat	1	0	0	0	0	0	0
1400	0	0	1	13	Ecolier	student	student	Fracture of lower limb	16.2.4	Tr (Bloc)	0	1	0	0	0	0	0
1401	1	0	0	42	Evangéliste	52	2060	Fractures	16.2	Tr (ORLO)	0	1	0	0	0	0	0
1402	0	0	1	2	?	?	?	Fracture of tibia and fibula	16.2.4.1	Exeat	1	0	0	0	0	0	0
1403	0	1	0	17	Ménagère	6	4230	Superficial injury; contusion	16.8	Exeat	1	0	0	0	0	0	0
1404	0	1	0	28	?	?	?	Appendicitis and other appendiceal conditions	9.6.1	Tr (Viscéral)	0	1	0	0	0	0	0
1405	1	0	0	17	?	?	?	Skull and face fractures	16.2.2	Tr (Bloc)	0	1	0	0	0	0	0
1406	1	0	0	51	Directeur commerce	85	120	Open wounds	16.6	Exeat	1	0	0	0	0	0	0
1407	0	0	1	4	Ecolier	student	student	Fracture of radius and ulna	16.2.3.2	Exeat	1	0	0	0	0	0	0
1408	0	1	0	15	Ménagère	6	4230	Somatoform disorders	5.15.7	Exeat	1	0	0	0	0	0	0
1409	1	0	0	18	Ecolier	student	student	Appendicitis and other appendiceal conditions	9.6.1	Tr (Viscéral)	0	1	0	0	0	0	0
1410	1	0	0	20	Ecolier	student	student	Other skin and subcutaneous infections	12.1.2	Tr (ORLO)	0	1	0	0	0	0	0
1411	1	0	0	31	Etudiant	student	student	Hypertension with complications and secondary hypertension	7.1.2	Exeat	1	0	0	0	0	0	0
1412	1	0	0	35	Tireur de pousse-pousse	15	9150	Open wounds of head; neck; and trunk	16.6.1	Exeat	1	0	0	0	0	0	0
1413	1	0	0	27	Peintre	19	6420	injury and poisoning	16	Tr (ORLO)	0	1	0	0	0	0	0
1414	1	0	0	30	Marin	46	9300	Open wounds of head; neck; and trunk	16.6.1	Exeat	1	0	0	0	0	0	0
1415	1	0	0	22	Etudiant	student	student	Superficial injury; contusion	16.8	Exeat	1	0	0	0	0	0	0
1416	0	1	0	17	Commerçant	20	4950	Somatoform disorders	5.15.7	Exeat	1	0	0	0	0	0	0
1417	1	0	0	34	Boucher	19	7810	Fracture of tibia and fibula	16.2.4.1	Tr (Traumato)	0	1	0	0	0	0	0
1418	0	0	1	8	Ecolier	student	student	Superficial injury; contusion	16.8	Exeat	1	0	0	0	0	0	0
1419	1	0	0	77	Cultivateur	42	205	Unspecified renal failure	10.1.2.2	Décharge	0	0	1	0	0	0	0
1420	1	0	0	77	Cultivateur	42	205	Tuberculosis	1.1.1	Tr (2P)	0	1	0	0	0	0	0
1421	1	0	0	17	Fermier	42	205	Other and unspecified metabolic; nutritional; and endocrine disorders	3.11.3	Exeat	1	0	0	0	0	0	0
1422	1	0	0	35	Comptable	86	800	Endocrine; nutritional; and metabolic diseases and immunity disorders	3	Exeat	1	0	0	0	0	0	0
1423	1	0	0	60	Balayeur COMAMA	10	4250	Fractures	16.2	Tr (Traumato)	0	1	0	0	0	0	0
1424	0	0	1	4	Ecolier	student	student	Other fracture of lower limb	16.2.4.3	Tr (Bloc)	0	1	0	0	0	0	0
1425	0	1	0	20	Commerçant	20	4950	Open wounds of extremities	16.6.2	Exeat	1	0	0	0	0	0	0
1426	1	0	0	60	Personnel d'appui	32	3655	Other infections; including parasitic	1.4	Décès	0	0	0	0	1	0	0
1427	0	1	0	30	Commerçant	20	4950	Superficial injury; contusion	16.8	Exeat	1	0	0	0	0	0	0
1428	0	1	0	33	?	?	?	Superficial injury; contusion	16.8	Exeat	1	0	0	0	0	0	0
1429	1	0	0	18	Etudiant	student	student	Intracranial injury	16.4	Décharge	0	0	1	0	0	0	0
1430	1	0	0	62	Retraité	retired	retired	Calculus of ureter	10.1.5.2	Tr (Viscéral)	0	1	0	0	0	0	0
1431	1	0	0	46	Exploiteur de fer	40	6940	Superficial injury; contusion	16.8	Exeat	1	0	0	0	0	0	0
1432	1	0	0	47	?	?	?			CED	0	0	0	0	0	1	0
1433	1	0	0	19	Ecolier	student	student	Acute appendicitis with abscess or peritonitis	9.6.1.1	Tr (Bloc)	0	1	0	0	0	0	0
1434	0	1	0	60	Cultivateur	42	205	Acute myocardial infarction	7.2.3	Tr (Cardio)	0	1	0	0	0	0	0
1435	0	1	0	45	Cultivateur	42	205	Sexually transmitted infections (not HIV or hepatitis)	1.1.3	Transfert (Gynéco)	0	1	0	0	0	0	0
1436	1	0	0	33	Militaire	military	military	Somatoform disorders	5.15.7	Exeat	1	0	0	0	0	0	0
1437	0	0	1	13	?	?	?	Fracture of radius and ulna	16.2.3.2	Exeat	1	0	0	0	0	0	0
1438	0	1	0	63	Auxiliaire puéricultrice retraitée	retired	retired	Skin and subcutaneous tissue infections	12.1	Tr (MI)	0	1	0	0	0	0	0
1439	0	1	0	26	Ménagère	6	4230	Paralysis	6.3	Evasan	0	0	0	0	0	0	1
1440	1	0	0	50	Ouvrier	20	6260	injury and poisoning	16	Décharge	0	0	1	0	0	0	0
1441	0	1	0	57	?	?	?	Other inflammatory diseases of female pelvic organs	10.3.2.4	Tr (Gynéco)	0	1	0	0	0	0	0
1442	0	1	0	42	Couturier	22	8350	Injury and poisoning	16	Exeat	1	0	0	0	0	0	0
1443	0	0	1	5	?	?	?	Superficial injury; contusion	16.8	Exeat	1	0	0	0	0	0	0
1444	0	1	0	18	Ménagère	6	4230	Abdominal pain	17.1.7	Décharge	0	0	1	0	0	0	0
1445	0	0	1	3	?	?	?	Superficial injury; contusion	16.8	Exeat	1	0	0	0	0	0	0
1446	0	0	1	1	?	?	?	Fracture of tibia and fibula	16.2.4.1	Tr (Bloc)	0	1	0	0	0	0	0
1447	0	1	0	?	Ecolier	student	student	Fracture of lower limb	16.2.4	Tr (Traumato)	0	1	0	0	0	0	0
1448	1	0	0	29	?	?	?	Open wounds of extremities	16.6.2	Exeat	1	0	0	0	0	0	0
1449	0	1	0	26	Etudiant	student	student	Open wounds of extremities	16.6.2	Exeat	1	0	0	0	0	0	0
1450	0	1	0	39	Ménagère	6	4230	Hypertension with complications and secondary hypertension	7.1.2	Tr (Cardio)	0	1	0	0	0	0	0
1451	1	0	0	?	Chauffeur	31	9140	Pneumonia (except that caused by TB or STD)	8.1.1	Décès	0	0	0	0	1	0	0
1452	1	0	0	41	Electricien	52	6355	Superficial injury; contusion	16.8	Exeat	1	0	0	0	0	0	0
1453	1	0	0	21	Etudiant	student	student	Inguinal hernia with obstruction or gangrene	9.5.1.1	Tr (Bloc)	0	1	0	0	0	0	0
1454	1	0	0	22	Cultivateur	42	205	injury and poisoning	16	Tr (ORLO)	0	1	0	0	0	0	0
1455	1	0	0	30	Gendarme	78	3850	Injury and poisoning	16	Tr (Traumato)	0	1	0	0	0	0	0
1456	1	0	0	49	Gardien	39	3930	Alcohol-related disorders	5.11	Tr (Neuro-Psy)	0	1	0	0	0	0	0
1457	1	0	0	29	Boucher	19	7810	Open wounds of extremities	16.6.2	Tr (Traumato)	0	1	0	0	0	0	0
1458	1	0	0	36	?	?	?	Intracranial injury	16.4	Tr (Traumato)	0	1	0	0	0	0	0
1459	1	0	0	35	Policier	78	3850	Intracranial injury	16.4	Tr (Traumato)	0	1	0	0	0	0	0
1460	1	0	0	41	?	?	?	Open wounds of head; neck; and trunk	16.6.1	Exeat	1	0	0	0	0	0	0
1461	0	0	1	3	?	?	?	Superficial injury; contusion	16.8	Exeat	1	0	0	0	0	0	0
1462	1	0	0	26	Tireur de pousse-pousse	15	9150	Open wounds of head; neck; and trunk	16.6.1	Décharge	0	0	1	0	0	0	0
1463	1	0	0	50	Marin	46	9300	Open wounds of head; neck; and trunk	16.6.1	Exeat	1	0	0	0	0	0	0
1464	1	0	0	48	Militaire	military	military	Diseases of male genital organs	10.2	Exeat	1	0	0	0	0	0	0
1465	1	0	0	47	Agent de liaison	?	?	Endocrine; nutritional; and metabolic diseases and immunity disorders	3	Exeat	1	0	0	0	0	0	0
1466	1	0	0	53	Gardien	39	3930	Inguinal hernia with obstruction or gangrene	9.5.1.1	Tr (Bloc)	0	1	0	0	0	0	0
1467	1	0	0	22	Agebt de sécurité	39	3930	Other gram negative septicemia	1.1.2.4	TR (MI)	0	1	0	0	0	0	0
1468	0	1	0	42	Commerçante	20	4950	Superficial injury; contusion	16.8	Exeat	1	0	0	0	0	0	0
1469	0	0	1	4	?	?	?	Intracranial injury	16.4	Exeat	1	0	0	0	0	0	0
1470	1	0	0	31	Boucher	19	7810	Open wounds of head; neck; and trunk	16.6.1	Exeat	1	0	0	0	0	0	0
1471	0	0	1	10	Ecolier	student	student	Fracture of radius and ulna	16.2.3.2	Tr (Traumato)	0	1	0	0	0	0	0
1472	1	0	0	18	Chômeur	unemployed	unemployed	Open wounds of extremities	16.6.2	Exeat	1	0	0	0	0	0	0
1473	1	0	0	55	?	?	?	Unspecified renal failure	10.1.2.2	Décharge	0	0	1	0	0	0	0
1474	1	0	0	26	Commerçant	20	4950	Open wounds of head; neck; and trunk	16.6.1	Exeat	1	0	0	0	0	0	0
1475	1	0	0	25	Tireur de pousse-pousse	15	9150	Open wounds of extremities	16.6.2	Exeat	1	0	0	0	0	0	0
1476	1	0	0	34	Jardinier	10	4250	Pneumonia (except that caused by TB or STD)	8.1.1	Tr (2P)	0	1	0	0	0	0	0
1477	1	0	0	38	Personnel d'appui SIB	32	3655	Tuberculosis	1.1.1	Tr (2P)	0	1	0	0	0	0	0
1478	1	0	0	40	Cultivateur	42	205	retention of urine	10.1.8.2	Tr (Uro)	0	1	0	0	0	0	0
1479	1	0	0	29	Chauffeur	31	9140	Burns	16.9	Tr (Traumato)	0	1	0	0	0	0	0
1480	1	0	0	61	Cultivateur	42	205	diabetes with ketoacidosis or uncontrolled diabetes	3.3.1	Décès	0	0	0	0	1	0	0
1481	1	0	0	58	Retraité	retired	retired	Alcohol-related disorders	5.11	Exeat	1	0	0	0	0	0	0
1482	1	0	0	18	Cultivateur	42	205	Coma; stupor; and brain damage	6.6	Décès	0	0	0	0	1	0	0
1483	1	0	0	73	Enseigant	84	2310	Intracranial hemorrhage	7.3.1.1	Décharge	0	0	1	0	0	0	0
1484	1	0	0	26	Etudiant	student	student	Other infections; including parasitic	1.4	Tr (MI)	0	1	0	0	0	0	0
1485	1	0	0	67	Instituteur retraité	retired	retired	Delirium dementia and amnestic and other cognitive disorders	5.4	Tr (Neuro-psy)	0	1	0	0	0	0	0
1486	1	0	0	25	Commerçant	20	4950	Open wounds of head; neck; and trunk	16.6.1	Evadé	0	0	0	1	0	0	0
1487	0	0	1	6	Ecolier	student	student	Open wounds of head; neck; and trunk	16.6.1	Exeat	1	0	0	0	0	0	0
1488	0	1	0	30	Vendeur	20	4950	Pneumonia (except that caused by TB or STD)	8.1.1	Tr (2P)	0	1	0	0	0	0	0
1489	1	0	0	65	?	?	?	Cardiac dysrhythmias	7.2.9	Tr (Cardio)	0	1	0	0	0	0	0
1490	1	0	0	58	Cultivateur	42	205	Hodgkins disease	2.10.1	Décès	0	0	0	0	1	0	0
1491	1	0	0	37	Agent de sécurité	39	3930	Superficial injury; contusion	16.8	Exeat	1	0	0	0	0	0	0
1492	1	0	0	60	Cultivateur	42	205	Heart failure	7.2.11.2	Tr (Cardio)	0	1	0	0	0	0	0
1493	0	1	0	15	Ecolier	student	student	intestinal infection	9.1	Exeat	1	0	0	0	0	0	0
1494	1	0	0	17	Etudiant	student	student	Intestinal infection	9.1	Tr (MI)	0	1	0	0	0	0	0
1495	1	0	0	27	Chômeur	unemployed	unemployed	Open wounds	16.6	Exeat	1	0	0	0	0	0	0
1496	1	0	0	59	Chauffeur	31	9140	Superficial injury; contusion	16.8	Exeat	1	0	0	0	0	0	0
1497	1	0	0	31	Cultivateur	42	205	Intestinal obstruction without hernia	9.6.3	Tr (Bloc)	0	1	0	0	0	0	0
1498	1	0	0	47	Planton	military	military	Skull and face fractures	16.2.2	Tr (ORLO)	0	1	0	0	0	0	0
1499	0	1	0	29	Etudiant	student	student	Superficial injury; contusion	16.8	Exeat	1	0	0	0	0	0	0
1500	0	1	0	70	Ménagère	6	4230	heart Failure	7.2.11.2	Décès	0	0	0	0	1	0	0
1501	0	1	0	70	Ménagère	6	4230	heart Failure	7.2.11.2	Tr (Cardio)	0	1	0	0	0	0	0
1502	0	1	0	18	?	?	?	Somatoform disorders	5.15.7	Exeat	1	0	0	0	0	0	0
1503	1	0	0	33	Pêcheur	23	6100	Open wounds of head; neck; and trunk	16.6.1	Exeat	1	0	0	0	0	0	0
1504	1	0	0	19	Etudiant	student	student	Fracture of upper limb	16.2.3	Décharge	0	0	1	0	0	0	0
1505	0	1	0	23	Cultivateur	42	205	Other gram negative septicemia	1.1.2.4	Tr (MI)	0	1	0	0	0	0	0
1506	0	1	0	20	Etudiant	student	student	Open wounds of extremities	16.6.2	Exeat	1	0	0	0	0	0	0
1507	0	0	1	10	Ecolier	student	student	Open wounds of extremities	16.6.2	Exeat	1	0	0	0	0	0	0
1508	0	1	0	24	Chômeur	unemployed	unemployed	Open wounds of head; neck; and trunk	16.6.1	Exeat	1	0	0	0	0	0	0
1509	0	1	0	20	Etudiant	student	student	intestinal infection	9.1	Exeat	1	0	0	0	0	0	0
1510	0	1	0	16	Ecolier	student	student	Appendicitis and other appendiceal conditions	9.6.1	Tr (Bloc)	0	1	0	0	0	0	0
1511	0	1	0	23	Chômeur	unemployed	unemployed	Unspecified renal failure	10.1.2.2	Décès	0	0	0	0	1	0	0
1512	0	1	0	17	Ecolier	student	student	Other gram negative septicemia	1.1.2.4	Exeat	1	0	0	0	0	0	0
1513	0	0	1	7	Ecolier	student	student	Fracture of tibia and fibula	16.2.4.1	Tr (Traumato)	0	1	0	0	0	0	0
1514	0	1	0	17	Etudiant	student	student	Somatoform disorders	5.15.7	Exeat	1	0	0	0	0	0	0
1515	1	0	0	22	Maçon	20	6220	Superficial injury; contusion	16.8	Exeat	1	0	0	0	0	0	0
1516	0	1	0	16	?	?	?	Superficial injury; contusion	16.8	Exeat	1	0	0	0	0	0	0
1517	0	0	1	10	Ecolier	student	student	Joint disorders and dislocations; trauma-related	16.1	Exeat	1	0	0	0	0	0	0
1518	1	0	0	49	Transporteur	38	9130	Open wounds of extremities	16.6.2	Evadé	0	0	0	1	0	0	0
1519	1	0	0	68	Gérant	84	20	Injury and poisoning	16	Décharge	0	0	1	0	0	0	0
1520	0	0	1	3	?	?	?	Sprains and strains	16.7	Exeat	1	0	0	0	0	0	0
1521	1	0	0	43	Marin	46	9300	Fracture of lower limb	16.2.4	Tr (Traumato)	0	1	0	0	0	0	0
1522	1	0	0	16	?	?	?	Superficial injury; contusion	16.8	Exeat	1	0	0	0	0	0	0
1523	1	0	0	19	Ecolier	student	student	Alcohol-related disorders	5.11	Exeat	1	0	0	0	0	0	0
1524	0	1	0	33	Cultivateur	42	205	Chronic ulcer of leg or foot	12.3.2	Transfert (Traumato)	0	1	0	0	0	0	0
1525	0	1	0	45	?	?	?	Intestinal obstruction without hernia	9.6.3	Tr (Bloc)	0	1	0	0	0	0	0
1526	1	0	0	40	Tireur de pousse-pousse	15	9150	Intracranial injury	16.4	Décès	0	0	0	0	1	0	0
1527	1	0	0	24	Agent SOCTAM	33	4540	Crushing injury or internal injury	16.5	Tr (Traumato)	0	1	0	0	0	0	0
1528	1	0	0	15	Ecolier	student	student	Injury and poisoning	16	Evadé	0	0	0	1	0	0	0
1529	1	0	0	50	?	?	?	Fractures	16.2	Evadé	0	0	0	1	0	0	0
1530	1	0	0	23	?	?	?	Superficial injury; contusion	16.8	Exeat	1	0	0	0	0	0	0
1531	0	1	0	16	Ecolier	student	student	Pneumonia (except that caused by TB or STD)	8.1.1	Exeat	1	0	0	0	0	0	0
1532	0	1	0	17	Ecolier	student	student	poisoning by nonmedicinal substances	16.11.3	Exeat	1	0	0	0	0	0	0
1533	0	1	0	61	Commerçant	20	4950	Intracranial hemorrhage	7.3.1.1	Décès	0	0	0	0	1	0	0
1534	0	0	1	9	Ecolier	student	student	Open wounds of head; neck; and trunk	16.6.1	Tr (Bloc)	0	1	0	0	0	0	0
1535	0	0	1	13	Ecolier	student	student	Superficial injury; contusion	16.8	Exeat	1	0	0	0	0	0	0
1536	1	0	0	39	Cultivateur	42	205	Open wounds of extremities	16.6.2	Exeat	1	0	0	0	0	0	0
1537	1	0	0	39	Cultivateur	42	205	Pneumonia (except that caused by TB or STD)	8.1.1	Décès	0	0	0	0	1	0	0
1538	0	1	0	18	Cultivateur	42	205	Other infections; including parasitic	1.4	Tr (MI)	0	1	0	0	0	0	0
1539	1	0	0	49	Surveillant marché	82	1310	Other fractures	16.2.5	Décharge	0	0	1	0	0	0	0
1540	1	0	0	43	Chauffeur	31	9140	Injury and poisoning	16	Tr (Traumato)	0	1	0	0	0	0	0
1541	1	0	0	69	Tireur de pousse-pousse	15	9150	Epilepsy	6.4.1	Décharge	0	0	1	0	0	0	0
1542	1	0	0	54	Chauffeur	31	9140	Hepatitis	1.3.2	Décès	0	0	0	0	1	0	0
1543	1	0	0	57	Tireur de pousse-pousse	15	9150	Open wounds of head; neck; and trunk	16.6.1	Exeat	1	0	0	0	0	0	0
1544	1	0	0	50	?	?	?	Intracranial injury	16.4	Tr (Traumato)	0	1	0	0	0	0	0
1545	1	0	0	22	Etudiant	student	student	Superficial injury; contusion	16.8	Exeat	1	0	0	0	0	0	0
1546	1	0	0	35	Opérateur économique	77	740	Intracranial injury	16.4	Tr (Traumato)	0	1	0	0	0	0	0
1547	1	0	1	47	Tradipraticien	77	3540	Open wounds of head; neck; and trunk	16.6.1	Exeat	1	0	0	0	0	0	0
1548	0	1	0	16	Etudiant	student	student	Poisoning	16.11	Exeat	1	0	0	0	0	0	0
1549	1	0	0	29	Chauffeur	31	9140	Skull and face fractures	16.2.2	Exeat	1	0	0	0	0	0	0
1550	0	1	0	30	Vendeur	20	4950	Other ear and sense organ disorders	6.8.3	Exeat	1	0	0	0	0	0	0
1551	0	0	1	6	Ecolier	student	student	Open wounds of extremities	16.6.2	Tr (ORLO)	0	1	0	0	0	0	0
1552	1	0	0	32	Chercheur de pierre précieuse	41	6820	Open wounds	16.6	Tr (Traumato)	0	1	0	0	0	0	0
1553	1	0	0	42	Contrôleur des impôts	52	5500	Joint disorders and dislocations; trauma-related	16.1	Tr (Traumato)	0	1	0	0	0	0	0
1554	0	1	0	23	Ménagère	6	4230	Open wounds of head; neck; and trunk	16.6.1	Exeat	1	0	0	0	0	0	0
1555	1	0	0	23	Etudiant	student	student	Depressive disorders	5.8.2	Tr (Neuro-psy)	0	1	0	0	0	0	0
1556	1	0	0	73	?	?	?	Other infections; including parasitic	1.4	Tr (MI)	0	1	0	0	0	0	0
1557	0	0	1	1.25	?	?	?	Open wounds of head; neck; and trunk	16.6.1	Exeat	1	0	0	0	0	0	0
1558	0	0	1	10	Ecolier	student	student	Open wounds of extremities	16.6.2	Exeat	1	0	0	0	0	0	0
1559	0	0	1	8	Ecolier	student	student	Fracture of radius and ulna	16.2.3.2	Tr (Traumato)	0	1	0	0	0	0	0
1560	0	1	0	60	Ménagère	6	4230	Somatoform disorders	5.15.7	Exeat	1	0	0	0	0	0	0
1561	1	0	0	52	Enseignant	84	2310	Cancer of liver and intrahepatic bile duct	2.2.3	Décès	0	0	0	0	1	0	0
1562	1	0	0	17	Etudiant	student	student	Sickle cell anemia	4.1.2	Tr (MI)	0	1	0	0	0	0	0
1563	1	0	0	20	Etudiant	student	student	Intestinal infection	9.1	Exeat	1	0	0	0	0	0	0
1564	1	0	0	30	Pêcheur	23	6100	Abdominal hernia	9.5	Tr (Bloc)	0	1	0	0	0	0	0
1565	1	0	0	46	Cultivateur	42	205	poisoning by nonmedicinal substances	16.11.3	Evadé	0	0	0	1	0	0	0
1566	1	0	0	28	Cultivateur	42	205	poisoning by nonmedicinal substances	16.11.3	Exeat	1	0	0	0	0	0	0
1567	1	0	0	18	Cultivateur	42	205	injury and poisoning	16	Transfert ORLO	0	1	0	0	0	0	0
1568	1	0	0	80	?	?	?	Intracranial injury	16.4	Exeat	1	0	0	0	0	0	0
1569	1	0	0	50	Cultivateur	42	205	Hypertension	7.1	Tr (Cardio)	0	1	0	0	0	0	0
1570	1	0	0	19	Etudiant	student	student	Other gram negative septicemia	1.1.2.4	Tr (MI)	0	1	0	0	0	0	0
1571	1	0	0	20	Tireur de pousse-pousse	15	9150	Superficial injury; contusion	16.8	Décharge	0	0	1	0	0	0	0
1572	1	0	0	26	Foot-balleur	33	2720	Open wounds of extremities	16.6.2	Exeat	1	0	0	0	0	0	0
1573	0	1	0	17	Ecolier	student	student	Other gram negative septicemia	1.1.2.4	Tr (CME)	0	1	0	0	0	0	0
1574	1	0	0	49	?	?	?	Injury and poisoning	16	Evadé	0	0	0	1	0	0	0
1575	0	1	0	40	Commerçant	20	4950	Superficial injury; contusion	16.8	Exeat	1	0	0	0	0	0	0
1576	1	0	0	48	Cultivateur	42	205	Acute cerebrovascular disease	7.3.1	Tr (Cardio)	0	1	0	0	0	0	0
1577	1	0	0	18	Tireur de pousse-pousse	15	9150	Open wounds of head; neck; and trunk	16.6.1	Exeat	1	0	0	0	0	0	0
1578	1	0	0	25	Tireur de pousse-pousse	15	9150	Superficial injury; contusion	16.8	Exeat	1	0	0	0	0	0	0
1579	1	0	0	53	?	?	?	Shock	17.1.5	Décès	0	0	0	0	1	0	0
1580	1	0	0	53	?	?	?	Gangrene	17.1.4	Tr (Traumato)	0	1	0	0	0	0	0
1581	1	0	0	31	?	?	?	Intestinal obstruction without hernia	9.6.3	Tr (Bloc)	0	1	0	0	0	0	0
1582	1	0	0	29	Chômeur	unemployed	unemployed	Gastrointestinal hemorrhage	9.10.0	Tr (HGE)	0	1	0	0	0	0	0
1583	0	1	0	20	Etudiant	student	student	Poisoning by other medications and drugs	16.11.2	Exeat	1	0	0	0	0	0	0
1584	0	1	0	30	Agent de sécurité	39	3930	Ovarian cyst	10.3.6	Tr (Gynéco)	0	1	0	0	0	0	0
1585	1	0	0	51	Marin	46	9300	Hypertension with complications and secondary hypertension	7.1.2	Tr (Cardio)	0	1	0	0	0	0	0
1586	0	1	0	74	Ménagère	6	4230	Other gram negative septicemia	1.1.2.4	Tr (MI)	0	1	0	0	0	0	0
1587	0	1	0	75	?	?	?	Intestinal obstruction without hernia	9.6.3	Décharge	0	0	1	0	0	0	0
1588	0	1	0	48	Ménagère	6	4230	Pneumonia (except that caused by TB or STD)	8.1.1	Tr (2P)	0	1	0	0	0	0	0
1589	0	1	0	67	Ménagère	6	4230	chronic renal failure	10.1.3	Décharge	0	0	1	0	0	0	0
1590	0	1	0	54	Cultivateur	42	205	Tuberculosis	1.1.1	Tr (2P)	0	1	0	0	0	0	0
1591	0	1	0	80	?	?	?	Intracranial hemorrhage	7.3.1.1	Décès	0	0	0	0	1	0	0
1592	0	1	0	50	Ménagère	6	4230	Other gram negative septicemia	1.1.2.4	Tr (MI)	0	1	0	0	0	0	0
1593	0	1	0	15	Ecolier	student	student	Poisoning by other medications and drugs	16.11.2	Evadé	0	0	0	1	0	0	0
1594	0	1	0	29	Ménagère	6	4230	Other inflammatory condition of skin	12.2	Tr (MI)	0	1	0	0	0	0	0
1595	0	1	0	32	Ménagère	6	4230	Other and unspecified gastrointestinal disorders	9.12.3	Exeat	1	0	0	0	0	0	0
1596	0	1	0	45	Cultivateur	42	205	Superficial injury; contusion	16.8	Exeat	1	0	0	0	0	0	0
1597	0	1	0	40	Ménagère	6	4230	Other gram negative septicemia	1.1.2.4	Tr (MI)	0	1	0	0	0	0	0
1598	0	1	0	20	Etudiant	student	student	Other gram negative septicemia	1.1.2.4	Exeat	1	0	0	0	0	0	0
1599	0	1	0	75	Ménagère	6	4230	Pneumonia (except that caused by TB or STD)	8.1.1	Décès	0	0	0	0	1	0	0
1600	0	1	0	75	?	?	?	Other gram negative septicemia	1.1.2.4	Tr (Neuro)	0	1	0	0	0	0	0
1601	0	1	0	69	Ménagère	6	4230	Injury and poisoning	16	Tr (2P)	0	1	0	0	0	0	0
1602	0	1	0	69	?	?	?	Intracranial injury	16.4	Tr (Traumato)	0	1	0	0	0	0	0
1603	0	1	0	25	Commerçante	20	4950	injury and poisoning	16	Exeat	1	0	0	0	0	0	0
1604	0	1	0	16	Femme de ménage	6	4230	poisoning by nonmedicinal substances	16.11.3	Exeat	1	0	0	0	0	0	0
1605	0	1	0	56	Couturière	22	8350	Diseases of the digestive system	9	Exeat	1	0	0	0	0	0	0
1606	0	1	0	16	?	?	?	Superficial injury; contusion	16.8	Décharge	0	0	1	0	0	0	0
1607	0	1	0	51	Ménagère	6	4230	Somatoform disorders	5.15.7	Exeat	1	0	0	0	0	0	0
1608	0	1	0	70	Retraité	retired	retired	urinary tract infections	10.1.4	Tr (MI)	0	1	0	0	0	0	0
1609	0	1	0	24	Ménagère	6	4230	Ovarian cyst	10.3.6	Tr (Gynéco)	0	1	0	0	0	0	0
1610	0	1	0	23	Ménagère	6	4230	Other inflammatory condition of skin	12.2	Tr (ORLO)	0	1	0	0	0	0	0
1611	0	1	0	16	Ecolier	student	student	Somatoform disorders	5.15.7	Exeat	1	0	0	0	0	0	0
1612	0	1	0	33	Femme de ménage	6	4230	Calculus of urinary tract	10.1.5	Exeat	1	0	0	0	0	0	0
1613	0	1	0	54	Ménagère	6	4230	Alcohol-related disorders	5.11	Tr (Neuro-psy)	0	1	0	0	0	0	0
1614	0	1	0	31	Gérante d'eau	84	20	Somatoform disorders	5.15.7	Exeat	1	0	0	0	0	0	0
1615	0	0	1	9.5	Ecolier	student	student	Sprains and strains	16.7	Exeat	1	0	0	0	0	0	0
1616	0	1	0	60	Cultivateur	42	205	Intracranial hemorrhage	7.3.1.1	Décès	0	0	0	0	1	0	0
1617	0	1	0	23	Etudiant	student	student	Fluid and electrolyte disorders	3.8	Exeat	1	0	0	0	0	0	0
1618	1	0	0	22	Maçon	20	6220	Intestinal infection	9.1	Tr (MI)	0	1	0	0	0	0	0
1619	0	1	0	22	Etudiant	student	student	Appendicitis and other appendiceal conditions	9.6.1	Tr (Viscéral)	0	1	0	0	0	0	0
1620	0	1	0	50	?	?	?	Superficial injury; contusion	16.8	Exeat	1	0	0	0	0	0	0
1621	0	1	0	22	Etudiant	student	student	Intestinal infection	9.1	Tr (MI)	0	1	0	0	0	0	0
1622	0	1	0	19	Etudiant	student	student	Acute gastritis	9.4.3.1	Tr (Cardio)	0	1	0	0	0	0	0
1623	0	1	0	68	Ménagère	6	4230	Nutritional deficiencies	3.5	Décharge	0	0	1	0	0	0	0
1624	0	1	0	68	?	?	?	Diabetes with ketoacidosis or uncontrolled diabetes	3.3.1	Tr (MI)	0	1	0	0	0	0	0
1625	0	1	0	60	Vendeur	20	4950	Pulmonary heart disease	7.2.6	Tr (Cardio)	0	1	0	0	0	0	0
1626	0	1	0	52	Ménagère	6	4230	Other asthma with acute exacerbation	8.3.2.3	Tr (2P)	0	1	0	0	0	0	0
1627	0	1	0	44	Ménagère	6	4230	Tuberculosis	1.1.1	Tr (2P)	0	1	0	0	0	0	0
1628	0	1	0	44	Cultivateur	42	205	Tuberculosis	1.1.1	Décès	0	0	0	0	1	0	0
1629	1	0	0	23	Etudiant	student	student	Tuberculosis	1.1.1	Tr (2P)	0	1	0	0	0	0	0
1630	0	0	1	8	?	?	?	Superficial injury; contusion	16.8	Exeat	1	0	0	0	0	0	0
1631	0	0	1	4	Ecolier	student	student	Superficial injury; contusion	16.8	Exeat	1	0	0	0	0	0	0
1632	0	1	0	63	Ménagère	6	4230	Intracranial hemorrhage	7.3.1.1	Décès	0	0	0	0	1	0	0
1633	1	0	0	40	?	?	?	Fractures	16.2	Décharge	0	0	1	0	0	0	0
1634	0	1	0	30	Ménagère	6	4230	Pulmonary heart disease	7.2.6	Tr (Cardio)	0	1	0	0	0	0	0
1635	0	1	0	23	?	?	?	somatoform disorders	5.15.7	Exeat	1	0	0	0	0	0	0
1636	0	1	0	35	Cultivateur	42	205	Other asthma with acute exacerbation	8.3.2.3	Décès	0	0	0	0	1	0	0
1637	1	0	0	16	?	?	?	Superficial injury; contusion	16.8	Tr (ORLO)	0	1	0	0	0	0	0
1638	1	0	0	65	Enseignant	84	2310	Convulsions	6.4.2	Tr (Neuro-psy)	0	1	0	0	0	0	0
1639	1	0	0	18	Vendeur	20	4950	Intracranial injury	16.4	Exeat	1	0	0	0	0	0	0
1640	1	0	0	47	?	?	?	Intracranial injury	16.4	Exeat	1	0	0	0	0	0	0
1641	1	0	0	23	Etudiant	student	student	Open wounds of head; neck; and trunk	16.6.1	Exeat	1	0	0	0	0	0	0
1642	0	1	0	76	?	?	?	Intracranial injury	16.4	Décharge	0	0	1	0	0	0	0
1643	1	0	0	31	Ouvrier de bois	20	6260	Fracture of upper limb	16.2.3	Exeat	1	0	0	0	0	0	0
1644	0	1	0	52	?	?	?			CED	0	0	0	0	0	1	0
1645	1	0	0	24	Etudiant	student	student	Calculus of kidney	10.1.5.1	Exeat	1	0	0	0	0	0	0
1646	1	0	0	23	Etudiant	student	student	Pneumonia (except that caused by TB or STD)	8.1.1	Tr (MI)	0	1	0	0	0	0	0
1647	0	1	0	57	?	?	?	Hypertension with complications and secondary hypertension	7.1.2	Tr (Cardio)	0	1	0	0	0	0	0
1648	0	0	1	12	Ecolier	student	student	Open wounds of extremities	16.6.2	Décharge	0	0	1	0	0	0	0
1649	1	0	0	18	Etudiant	student	student	Superficial injury; contusion	16.8	Exeat	1	0	0	0	0	0	0
1650	1	0	0	24	Tireur de pousse-pousse	15	9150	Superficial injury; contusion	16.8	Exeat	1	0	0	0	0	0	0
1651	1	0	0	39	Tireur de pousse-pousse	15	9150	Meningitis (except that caused by TB or STD)	6.1.1	Décès	0	0	0	0	1	0	0
1652	1	0	0	30	Tireur de pousse-pousse	15	9150	Open wounds of head; neck; and trunk	16.6.1	Exeat	1	0	0	0	0	0	0
1653	0	1	0	80	Cultivateur	42	205	Diabetes mellitus with complications	3.3	Tr (Neuro-psy)	0	1	0	0	0	0	0
1654	0	1	0	26	Institutrice	84	2310	Somatoform disorders	5.15.7	Exeat	1	0	0	0	0	0	0
1655	1	0	0	33	Instituteur	84	2310	Open wounds of extremities	16.6.2	Exeat	1	0	0	0	0	0	0
1656	0	1	0	21	Vendeur	20	4950	Preeclampsia and eclampsia	11.3.3.1	Décharge	0	0	1	0	0	0	0
1657	0	1	0	31	Ménagère	6	4230	Anemia	4.1	Tr (Gynéco)	0	1	0	0	0	0	0
1658	1	0	0	25	Maçon	20	6220	Open wounds of head; neck; and trunk	16.6.1	Exeat	1	0	0	0	0	0	0
1659	0	1	0	25	Vendeur	20	4950	Skull and face fractures	16.2.2	Evasan (Tanà)	0	0	0	0	0	0	1
1660	1	0	0	19	Cultivateur	42	205	intestinal infection	9.1	Tr (MI)	0	1	0	0	0	0	0
1661	1	0	0	32	Gérant	84	20	Superficial injury; contusion	16.8	Exeat	1	0	0	0	0	0	0
1662	0	1	0	59	Secrétaire	53	5700	Somatoform disorders	5.15.7	Exeat	1	0	0	0	0	0	0
1663	1	0	0	27	Tireur de pousse-pousse	15	9150	Open wounds of head; neck; and trunk	16.6.1	Exeat	1	0	0	0	0	0	0
1664	0	1	0	54	Ménagère	6	4230	Other infections; including parasitic	1.4	Tr (MI)	0	1	0	0	0	0	0
1665	1	0	0	25	Etudiant	student	student	Other injuries and conditions due to external causes	16.12	Exeat	1	0	0	0	0	0	0
1666	1	0	0	26	Etudiant	student	student	Superficial injury; contusion	16.8	Exeat	1	0	0	0	0	0	0
1667	1	0	0	25	Ouvrier SIRAMA	20	6260	Fracture of vertebral column without mention of spinal cord injury	16.2.5.1	Tr (Traumato)	0	1	0	0	0	0	0
1668	0	1	0	15	?	?	?	Unspecified septicemia	1.1.2.6	Décès	0	0	0	0	1	0	0
1669	1	0	0	44	Mineur	40	6940	Liver disease	9.8	Tr (HGE)	0	1	0	0	0	0	0
1670	1	0	0	40	Cultivateur	42	205	Open wounds of head; neck; and trunk	16.6.1	Tr (Traumato)	0	1	0	0	0	0	0
1671	0	1	0	42	Agent SOGEDIPROMA	23	6100	Neoplasms of unspecified nature or uncertain behavior	2.14	Tr (Gynéco)	0	1	0	0	0	0	0
1672	0	1	0	42	?	?	?	Cancer of breast	2.5	Décès	0	0	0	0	1	0	0
1673	1	0	0	34	Tireur de pousse-pousse	15	9150	Superficial injury; contusion	16.8	Exeat	1	0	0	0	0	0	0
1674	1	0	0	25	Commerçant	20	4950	Open wounds of head; neck; and trunk	16.6.1	Exeat	1	0	0	0	0	0	0
1675	1	0	0	36	Cultivateur	42	205	injury and poisoning	16	Exeat	1	0	0	0	0	0	0
1676	1	0	0	30	Tireur de pousse-pousse	15	9150	injury and poisoning	16	Décharge	0	0	1	0	0	0	0
1677	1	0	0	23	Tireur de pousse-pousse	15	9150	Fracture of humerus	16.2.3.1	Tr (Bloc)	0	1	0	0	0	0	0
1678	1	0	0	28	Tireur de pousse-pousse	15	9150	Open wounds of head; neck; and trunk	16.6.1	Exeat	1	0	0	0	0	0	0
1679	1	0	0	35	Cultivateur	42	205	Liver disease	9.8	Tr (HGE)	0	1	0	0	0	0	0
1680	0	1	0	50	Cultivateur	42	205	cancer of uterus	2.6.1	Tr (Gynéco)	0	1	0	0	0	0	0
1681	0	1	0	19	Commerçant	20	4950	Poisoning	16.11	Tr (Neuro-Psy)	0	1	0	0	0	0	0
1682	1	0	0	38	Chauffeur	31	9140	Injury and poisoning	16	Evadé	0	0	0	1	0	0	0
1683	0	0	1	10	Ecolier	student	student	Intracranial injury	16.4	Exeat	1	0	0	0	0	0	0
1684	1	0	0	51	Commerçant	20	4950	Open wounds of extremities	16.6.2	Exeat	1	0	0	0	0	0	0
1685	1	0	0	31	Agent Aqualma	34	4760	Other gram negative septicemia	1.1.2.4	Tr (MI)	0	1	0	0	0	0	0
1686	1	0	0	24	Bricoleur	45	7340	Open wounds of head; neck; and trunk	16.6.1	Exeat	1	0	0	0	0	0	0
1687	1	0	0	20	Manœuvre	21	9620	Intestinal infection	9.1	Décharge	0	0	1	0	0	0	0
1688	0	1	0	33	?	?	?	Open wounds	16.6	Exeat	1	0	0	0	0	0	0
1689	0	1	0	35	Ménagère	6	4230	Poisoning	16.11	Décharge	0	0	1	0	0	0	0
1690	1	0	0	35	Pêcheur	23	6100	Superficial injury; contusion	16.8	Exeat	1	0	0	0	0	0	0
1691	1	0	0	73	Cultivateur	42	205	Open wounds of extremities	16.6.2	Tr (Traumato)	0	1	0	0	0	0	0
1692	0	1	0	56	Cultivateur	42	205	Superficial injury; contusion	16.8	Exeat	1	0	0	0	0	0	0
1693	0	1	0	46	Vendeur	20	4950	Menopausal disorders	10.3.7	Tr (Gynéco)	0	1	0	0	0	0	0
1694	0	1	0	54	Ménagère	6	4230	Acute cerebrovascular disease	7.3.1	Tr (Neuro-psy)	0	1	0	0	0	0	0
1695	0	1	0	42	Nomade/religion	unemployed	unemployed	Open wounds of head; neck; and trunk	16.6.1	Exeat	1	0	0	0	0	0	0
1696	0	1	0	20	Etudiant	student	student	allergic reactions	17.1.9	Tr (MI)	0	1	0	0	0	0	0
1697	0	1	0	17	?	?	?	Other back pain and disorders	13.3.3.7	Exeat	1	0	0	0	0	0	0
1698	0	1	0	25	Socité ciam	59	1900	Other gram negative septicemia	1.1.2.4	Tr (MI)	0	1	0	0	0	0	0
1699	0	1	0	20	Etudiant	student	student	Other gram negative septicemia	1.1.2.4	Tr (HGE)	0	1	0	0	0	0	0
1700	1	0	0	37	Commerçant	20	4950	Superficial injury; contusion	16.8	Exeat	1	0	0	0	0	0	0
1701	1	0	0	26	Pâtissier	40	4000	Fracture of humerus	16.2.3.1	Tr (Traumato)	0	1	0	0	0	0	0
1702	0	1	0	26	Enseignant	84	2310	Appendicitis and other appendiceal conditions	9.6.1	Tr (Viscéral)	0	1	0	0	0	0	0
1703	1	0	0	?	Matelot	46	9300			CED	0	0	0	0	0	1	0
1704	0	1	0	36	Animatrice	41	2760	convulsions	6.4.2	Exeat	1	0	0	0	0	0	0
1705	0	1	0	38	Ménagère	6	4230	Heart failure	7.2.11.2	Décès	0	0	0	0	1	0	0
1706	0	1	0	24	Etudiant	student	student	Acute bronchitis	8.1.4	Exeat	1	0	0	0	0	0	0
1707	0	1	0	43	Fermière	42	205	Superficial injury; contusion	16.8	Exeat	1	0	0	0	0	0	0
1708	1	0	0	36	Pêcheur	23	6100	Pneumonia (except that caused by TB or STD)	8.1.1	Décès	0	0	0	0	1	0	0
1709	1	0	0	34	?	?	?	Open wounds of head; neck; and trunk	16.6.1	Exeat	1	0	0	0	0	0	0
1710	1	0	0	18	?	?	?	Open wounds of head; neck; and trunk	16.6.1	Exeat	1	0	0	0	0	0	0
1711	0	0	1	6	Ecolier	student	student	Open wounds of extremities	16.6.2	Exeat	1	0	0	0	0	0	0
1712	0	0	1	2.5	?	?	?	Superficial injury; contusion	16.8	Exeat	1	0	0	0	0	0	0
1713	0	1	0	24	Nomade/religion	unemployed	unemployed	Open wounds of head; neck; and trunk	16.6.1	Exeat	1	0	0	0	0	0	0
1714	0	1	0	16	Ménagère	6	4230	Spontaneous abortion	11.2.1	Tr (CME)	0	1	0	0	0	0	0
1715	0	1	0	25	Ménagère	6	4230	Pneumonia (except that caused by TB or STD)	8.1.1	Tr (2P)	0	1	0	0	0	0	0
1716	1	0	0	15	Ecolier	student	student	abdominal pain	17.1.7	Décharge	0	0	1	0	0	0	0
1717	0	0	1	14	Ecolier	student	student	Open wounds of extremities	16.6.2	Exeat	1	0	0	0	0	0	0
1718	1	0	0	49	Cultivateur	42	205	Cancer; other respiratory and intrathoracic	2.11.2	Tr (MI)	0	1	0	0	0	0	0
1719	0	0	1	12	Ecolier	student	student	Other fracture of upper limb	16.2.3.3	Tr (Traumato)	0	1	0	0	0	0	0
1720	0	1	0	45	Ménagère	6	4230	Symptoms; signs; and ill-defined conditions	17.1	Tr (MI)	0	1	0	0	0	0	0
1721	1	0	0	25	Manœuvre	21	9620	Open wounds of extremities	16.6.2	Tr (Traumato)	0	1	0	0	0	0	0
1722	0	1	0	34	Ménagère	6	4230	Other inflammatory diseases of female pelvic organs	10.3.2.4	Tr (Gynéco)	0	1	0	0	0	0	0
1723	0	1	0	20	Etudiant	student	student	Superficial injury; contusion	16.8	Exeat	1	0	0	0	0	0	0
1724	0	0	1	0.416667	?	?	?	Superficial injury; contusion	16.8	Exeat	1	0	0	0	0	0	0
1725	1	0	0	33	?	?	?	Pneumonia (except that caused by TB or STD)	8.1.1	Tr (2P)	0	1	0	0	0	0	0
1726	1	0	0	49	Enseignant	84	2310	Lower gastrointestinal disorders	9.6	Tr (HGE)	0	1	0	0	0	0	0
1727	1	0	0	20	?	?	?	Superficial injury; contusion	16.8	Exeat	1	0	0	0	0	0	0
1728	0	1	0	32	Ménagère	6	4230	Somatoform disorders	5.15.7	Exeat	1	0	0	0	0	0	0
1729	1	0	0	25	Journalier	75	2810	Alcohol-related disorders	5.11	Exeat	1	0	0	0	0	0	0
1730	1	0	0	24	Transporteur	38	9130	Open wounds of extremities	16.6.2	Exeat	1	0	0	0	0	0	0
1731	0	0	1	2	?	?	?	Open wounds of head; neck; and trunk	16.6.1	Exeat	1	0	0	0	0	0	0
1732	0	0	1	0.583333	?	?	?	Superficial injury; contusion	16.8	Exeat	1	0	0	0	0	0	0
1733	0	0	1	7	Ecolier	student	student	Fracture of humerus	16.2.3.1	Tr (Traumato)	0	1	0	0	0	0	0
1734	0	1	0	15	Ecolier	student	student	Somatoform disorders	5.15.7	Exeat	1	0	0	0	0	0	0
1735	0	1	0	32	Vendeur	20	4950	Other gram negative septicemia	1.1.2.4	Tr (MI)	0	1	0	0	0	0	0
1736	1	0	0	33	Cultivateur	42	205	Pneumonia (except that caused by TB or STD)	8.1.1	Tr (2P)	0	1	0	0	0	0	0
1737	1	0	0	32	Militaire	military	military	Open wounds of extremities	16.6.2	Exeat	1	0	0	0	0	0	0
1738	0	1	0	41	Vendeur	20	4950	pulmonary heart disease	7.2.6	Tr (2P)	0	1	0	0	0	0	0
1739	1	0	0	42	Exploitant agricole	7	6050	Open wounds of head; neck; and trunk	16.6.1	Exeat	1	0	0	0	0	0	0
1740	0	1	0	31	Serveur	25	4110	Other fracture of lower limb	16.2.4.3	Tr (Traumato)	0	1	0	0	0	0	0
1741	0	1	0	67	?	?	?	Transient cerebral ischemia	7.3.4	Tr (Cardio)	0	1	0	0	0	0	0
1742	0	1	0	32	Secrétaire Direction CHU	53	5700	intestinal infection	9.1	Tr (MI)	0	1	0	0	0	0	0
1743	1	0	0	32	Militaire	military	military	Intracranial hemorrhage	7.3.1.1	Décès	0	0	0	0	1	0	0
1744	1	0	0	77	Comptable retraité	retired	retired	Epilepsy	6.4.1	Tr (Neuro-Psy)	0	1	0	0	0	0	0
1745	1	0	0	34	Cultivateur	42	205	Open wounds of extremities	16.6.2	Tr (Traumato)	0	1	0	0	0	0	0
1746	1	0	0	58	Chauffeur	31	9140	Unspecified renal failure	10.1.2.2	Décès	0	0	0	0	1	0	0
1747	0	1	0	42	Etudiante médecine	student	student	intestinal infection	9.1	Tr (MI)	0	1	0	0	0	0	0
1748	1	0	0	54	?	?	?	Other and unspecified metabolic; nutritional; and endocrine disorders	3.11.3	Tr (MI)	0	1	0	0	0	0	0
1749	1	0	0	23	Menuisier	28	6230	Fracture of upper limb	16.2.3	Exeat	1	0	0	0	0	0	0
1750	1	0	0	45	Marin	46	9300	Occlusion of cerebral arteries	7.3.1.2	Tr (Neuro-Psy)	0	1	0	0	0	0	0
1751	1	0	0	24	Foot-balleur	33	2720	Alcohol-related disorders	5.11	Exeat	1	0	0	0	0	0	0
1752	1	0	0	34	Contre-maître	53	6200	Superficial injury; contusion	16.8	Exeat	1	0	0	0	0	0	0
1753	1	0	0	34	Eleveur	42	205	Joint disorders and dislocations; trauma-related	16.1	Tr (Traumato)	0	1	0	0	0	0	0
1754	0	1	0	39	?	?	?	Superficial injury; contusion	16.8	Exeat	1	0	0	0	0	0	0
1755	0	1	0	67	?	?	?	Occlusion of cerebral arteries	7.3.1.2	Décharge	0	0	1	0	0	0	0
1756	0	1	0	33	Ménagère	6	4230	injury and poisoning	16	Tr (Gynéco)	0	1	0	0	0	0	0
1757	0	1	0	41	?	?	?	Superficial injury; contusion	16.8	Exeat	1	0	0	0	0	0	0
1758	1	0	0	32	?	?	?	Intracranial injury	16.4	Tr (Neuro-psy)	0	1	0	0	0	0	0
1759	0	1	0	29	Menuisier	28	6230	Open wounds of extremities	16.6.2	Exeat	1	0	0	0	0	0	0
1760	1	0	0	42	Pêcheur	23	6100	Gastrointestinal hemorrhage	9.10.0	Tr (HGE)	0	1	0	0	0	0	0
1761	1	0	0	15	Ecolier	student	student	Other gram negative septicemia	1.1.2.4	Tr (MI)	0	1	0	0	0	0	0
1762	1	0	0	53	Pasteur	78	2040	Shock	17.1.5	Décès	0	0	0	0	1	0	0
1763	0	1	0	69	Ménagère	6	4230	Intracranial hemorrhage	7.3.1.1	Décès	0	0	0	0	1	0	0
1764	1	0	0	44	Cultivateur	42	205	Injury and poisoning	16	Tr (Traumato)	0	1	0	0	0	0	0
1765	1	0	0	44	Chauffeur	31	9140	Other infections; including parasitic	1.4	Tr (Neuro-psy)	0	1	0	0	0	0	0
1766	1	0	0	62	DG	84	20	Superficial injury; contusion	16.8	Décharge	0	0	1	0	0	0	0
1767	1	0	0	58	Mécanicien	36	7200	Paralysis	6.3	Tr (Neuro-psy)	0	1	0	0	0	0	0
1768	1	0	0	?	Couturier	22	8350	Alcohol-related disorders	5.11	Décharge	0	0	1	0	0	0	0
1769	0	1	0	26	Etudiant	student	student	Migraine	6.5.1	Décharge	0	0	1	0	0	0	0
1770	0	1	0	32	?	?	?	Hemorrhage during pregnancy; abruptio placenta; placenta previa	11.3.2	Tr (CME)	0	1	0	0	0	0	0
1771	1	0	0	53	Commerçant	20	4950	Diabetes with ketoacidosis or uncontrolled diabetes	3.3.1	Tr (MI)	0	1	0	0	0	0	0
1772	1	0	0	68	?	?	?	Other and unspecified metabolic; nutritional; and endocrine disorders	3.11.3	Tr (MI)	0	1	0	0	0	0	0
1773	1	0	0	40	Chômeur	unemployed	unemployed	Alcohol-related disorders	5.11	Exeat	1	0	0	0	0	0	0
1774	1	0	0	39	Chômeur	unemployed	unemployed	Pneumonia (except that caused by TB or STD)	8.1.1	Tr (2P)	0	1	0	0	0	0	0
1775	1	0	0	70	Retraité	retired	retired	heart Failure	7.2.11.2	Tr (Cardio)	0	1	0	0	0	0	0
1776	0	1	0	22	Etudiant	student	student	Other gram negative septicemia	1.1.2.4	Tr (MI)	0	1	0	0	0	0	0
1777	0	1	0	42	?	?	?	Cardiac dysrhythmias	7.2.9	Exeat	1	0	0	0	0	0	0
1778	0	1	0	27	Ménagère	6	4230	Open wounds of head; neck; and trunk	16.6.1	Exeat	1	0	0	0	0	0	0
1779	0	1	0	17	Ecolier	student	student	poisoning by nonmedicinal substances	16.11.3	Exeat	1	0	0	0	0	0	0
1780	1	0	0	27	Gardien	39	3930	Other infections; including parasitic	1.4	Tr (MI)	0	1	0	0	0	0	0
1781	0	1	0	36	Ménagère	6	4230	Gastrointestinal hemorrhage	9.10.0	Tr (HGE)	0	1	0	0	0	0	0
1782	1	0	0	72	Chômeur	unemployed	unemployed	Superficial injury; contusion	16.8	Exeat	1	0	0	0	0	0	0
1783	1	0	0	19	?	?	?	Superficial injury; contusion	16.8	Exeat	1	0	0	0	0	0	0
1784	1	0	0	32	Garde du corps	14	3955	Superficial injury; contusion	16.8	Exeat	1	0	0	0	0	0	0
1785	1	0	0	21	Etudiant	student	student	Other venous embolism and thrombosis	7.5.1.2	Décès	0	0	0	0	1	0	0
1786	1	0	0	20	Vendeur	20	4950	Open wounds of extremities	16.6.2	Exeat	1	0	0	0	0	0	0
1787	1	0	0	21	Commerçant	20	4950	Superficial injury; contusion	16.8	Exeat	1	0	0	0	0	0	0
1788	1	0	0	64	Cultivateur	42	205	Tuberculosis	1.1.1	Tr (2P)	0	1	0	0	0	0	0
1789	0	1	0	53	?	?	?	depressive disorders	5.8.2	Tr (Neuro-psy)	0	1	0	0	0	0	0
1790	0	1	0	19	Ménagère	6	4230	injury and poisoning	16	Exeat	1	0	0	0	0	0	0
1791	1	0	0	56	Gendarme	78	3850	Alcohol-related disorders	5.11	Exeat	1	0	0	0	0	0	0
1792	1	0	0	24	Gestionnaire Méd International	84	20	Open wounds of head; neck; and trunk	16.6.1	Exeat	1	0	0	0	0	0	0
1793	0	0	1	4	?	?	?	Superficial injury; contusion	16.8	Exeat	1	0	0	0	0	0	0
1794	0	0	1	11	Ecolier	student	student	Intracranial injury	16.4	Exeat	1	0	0	0	0	0	0
1795	1	0	0	26	Docker	32	9750	Open wounds	16.6	Exeat	1	0	0	0	0	0	0
1796	0	0	1	5	Ecolier	student	student	injury and poisoning	16	Tr (ORLO)	0	1	0	0	0	0	0
1797	0	0	1	11	Ecolier	student	student	Superficial injury; contusion	16.8	Exeat	1	0	0	0	0	0	0
1798	0	1	0	26	Etudiant	student	student	injury and poisoning	16	Tr (Traumato)	0	1	0	0	0	0	0
1799	1	0	0	25	Mécanicien	36	7200	Intracranial injury	16.4	Exeat	1	0	0	0	0	0	0
1800	0	1	0	26	Vendeur	20	4950	Somatoform disorders	5.15.7	Exeat	1	0	0	0	0	0	0
1801	0	1	0	18	Etudiant	student	student	Somatoform disorders	5.15.7	Exeat	1	0	0	0	0	0	0
1802	1	0	0	20	Commerçant	20	4950	Miscellaneous mental disorders	5.15	Exeat	1	0	0	0	0	0	0
1803	1	0	0	37	Commerçant	20	4950	Open wounds of extremities	16.6.2	Exeat	1	0	0	0	0	0	0
1804	1	0	0	36	Transporteur	38	9130	Asthma	8.3	Tr (2P)	0	1	0	0	0	0	0
1805	1	0	0	64	Tireur de pousse-pousse	15	9150	Shock	17.1.5	Décès	0	0	0	0	1	0	0
1806	1	0	0	17	Cultivateur	42	205	Skull and face fractures	16.2.2	Tr (ORLO)	0	1	0	0	0	0	0
1807	0	1	0	21	?	?	?	poisoning by nonmedicinal substances	16.11.3	Décharge	0	0	1	0	0	0	0
1808	0	1	0	23	?	?	?			CED	0	0	0	0	0	1	0
1809	0	1	0	16	Ecolier	student	student	Pleurisy; pleural effusion	8.5.1	Tr (2P)	0	1	0	0	0	0	0
1810	0	1	0	30	?	?	?			CED	0	0	0	0	0	1	0
1811	0	0	1	2.5	?	?	?	Superficial injury; contusion	16.8	Exeat	1	0	0	0	0	0	0
1812	0	1	0	50	Commerçant	20	4950	Hypertension with complications and secondary hypertension	7.1.2	Evasan Tanà	0	0	0	0	0	0	1
1813	1	0	0	41	Chauffeur	31	9140	injury and poisoning	16	Tr (Traumato)	0	1	0	0	0	0	0
1814	1	0	0	21	Etudiant	student	student	Other gram negative septicemia	1.1.2.4	Tr (MI)	0	1	0	0	0	0	0
1815	1	0	0	24	Tâcheron	32	8920	Other infections; including parasitic	1.4	Tr(MI)	0	1	0	0	0	0	0
1816	1	0	0	40	Chef de chantier	39	6005	intestinal infection	9.1	Exeat	1	0	0	0	0	0	0
1817	0	0	1	8	Ecolier	student	student	Superficial injury; contusion	16.8	Exeat	1	0	0	0	0	0	0
1818	0	1	0	58	?	?	?	Pneumonia (except that caused by TB or STD)	8.1.1	Tr (2P)	0	1	0	0	0	0	0
1819	1	0	0	64	Cultivateur	42	205	Retention of urine	10.1.8.2	Tr (Uro)	0	1	0	0	0	0	0
1820	0	0	1	13	Ecolier	student	student	Sickle cell anemia	4.1.2	Tr (Péd)	0	1	0	0	0	0	0
1821	0	0	1	14	Ecolier	student	student	Poisoning by other medications and drugs	16.11.2	Exeat	1	0	0	0	0	0	0
1822	1	0	0	63	Cultivateur	42	205	Endocrine; nutritional; and metabolic diseases and immunity disorders	3	Tr (MI)	0	1	0	0	0	0	0
1823	0	1	0	17	Garagiste	36	7200	intestinal infection	9.1	Exeat	1	0	0	0	0	0	0
1824	0	1	0	50	Vendeur	20	4950	cancer of uterus	2.6.1	Décharge	0	0	1	0	0	0	0
1825	1	0	0	36	Cultivateur	42	205	Skull and face fractures	16.2.2	Tr (ORLO)	0	1	0	0	0	0	0
1826	1	0	0	61	?	?	?	malaise and fatigue	17.1.8	Exeat	1	0	0	0	0	0	0
1827	1	0	0	61	Electricien retraité	retired	retired	Occlusion of cerebral arteries	7.3.1.2	Tr (Cardio)	0	1	0	0	0	0	0
1828	1	0	0	49	Technicien SOCTAM	40	7630	Fracture of humerus	16.2.3.1	Tr (Traumato)	0	1	0	0	0	0	0
1829	0	0	1	8	Ecolier	student	student	Intracranial injury	16.4	Exeat	1	0	0	0	0	0	0
1830	0	0	1	0.833333	?	?	?	Diseases of the respiratory system	8	Tr (Péd)	0	1	0	0	0	0	0
1831	1	0	0	18	Receveur Bus	32	9120	Open wounds of extremities	16.6.2	Exeat	1	0	0	0	0	0	0
1832	1	0	0	16	Ecolier	student	student	Superficial injury; contusion	16.8	Exeat	1	0	0	0	0	0	0
1833	0	1	0	22	Ménagère	6	4230	Poisoning by other medications and drugs	16.11.2	Exeat	1	0	0	0	0	0	0
1834	1	0	0	34	Docker	32	9750	Endocrine; nutritional; and metabolic diseases and immunity disorders	3	Exeat	1	0	0	0	0	0	0
1835	0	0	1	3	?	?	?	injury and poisoning	16	Exeat	1	0	0	0	0	0	0
1836	0	1	0	15	?	?	?	Meningitis (except that caused by TB or STD)	6.1.1	Tr (ORLO)	0	1	0	0	0	0	0
1837	0	1	0	17	Commerçant	20	4950	Poisoning by other medications and drugs	16.11.2	Exeat	1	0	0	0	0	0	0
1838	1	0	0	60	?	?	?	Acute upper respiratory infections of multiple or unspecified sites	8.1.5.1	Décès	0	0	0	0	1	0	0
1839	0	1	0	76	Ménagère	6	4230	Acute cerebrovascular disease	7.3.1	Tr (Neuro-psy)	0	1	0	0	0	0	0
1840	0	1	0	26	Commerçant	20	4950	Ectopic pregnancy	11.3.1	Tr (Gynéco)	0	1	0	0	0	0	0
1841	1	0	0	66	Gardien retraité	retired	retired	Hypertension with complications and secondary hypertension	7.1.2	Evasan (Tanà)	0	0	0	0	0	0	1
1842	1	0	0	60	Cultivateur	42	205	Liver disease	9.8	Décharge	0	0	1	0	0	0	0
1843	1	0	0	57	Vaguemestre du CHU	63	5550	Pneumonia (except that caused by TB or STD)	8.1.1	Tr (2P)	0	1	0	0	0	0	0
1844	1	0	0	56	?	?	?	Open wounds of head; neck; and trunk	16.6.1	Exeat	1	0	0	0	0	0	0
1845	1	0	0	34	Tireur de pousse-pousse	15	9150	Tuberculosis	1.1.1	Décharge	0	0	1	0	0	0	0
1846	0	1	0	18	Etudiant	student	student	Cardiac dysrhythmias	7.2.9	Exeat	1	0	0	0	0	0	0
1847	1	0	0	23	Tireur de pousse-pousse	15	9150	injury and poisoning	16	Tr (ORLO)	0	1	0	0	0	0	0
1848	1	0	0	29	Chômeur	unemployed	unemployed	Open wounds of head; neck; and trunk	16.6.1	Exeat	1	0	0	0	0	0	0
1849	1	0	0	20	Pêcheur	23	6100	Open wounds of head; neck; and trunk	16.6.1	Tr (ORLO)	0	1	0	0	0	0	0
1850	1	0	0	44	Chalandier	46	9300	Open wounds of extremities	16.6.2	Exeat	1	0	0	0	0	0	0
1851	1	0	0	41	Docker	32	9750	Malaise and fatigue	17.1.8	Tr (MI)	0	1	0	0	0	0	0
1852	0	0	1	6	?	?	?	Superficial injury; contusion	16.8	Tr (Traumato)	0	1	0	0	0	0	0
1853	0	1	0	18	?	?	?	Crushing injury or internal injury	16.5	Tr (Gynéco)	0	1	0	0	0	0	0
1854	0	1	0	31	Vendeur	20	4950	Normal pregnancy and/or delivery	11.7	Tr (CME)	0	1	0	0	0	0	0
1855	0	1	0	28	Ménagère	6	4230	Intracranial injury	16.4	Exeat	1	0	0	0	0	0	0
1856	1	0	0	53	Instituteur	84	2310	Superficial injury; contusion	16.8	Exeat	1	0	0	0	0	0	0
1857	1	0	0	47	Chauffeur	31	9140	Diabetes mellitus with complications	3.3	Tr (Cardio)	0	1	0	0	0	0	0
1858	0	1	0	19	Etudiant	student	student	Poisoning by other medications and drugs	16.11.2	Exeat	1	0	0	0	0	0	0
1859	0	1	0	60	?	?	?	Tuberculosis	1.1.1	Tr (2P)	0	1	0	0	0	0	0
1860	0	1	0	60	Retraité	retired	retired	Tuberculosis	1.1.1	Décès	0	0	0	0	1	0	0
1861	0	1	0	15	Etudiant	student	student	Somatoform disorders	5.15.7	Tr (Neuro-psy)	0	1	0	0	0	0	0
1862	1	0	0	48	Entrepreneur	77	740	Other gram negative septicemia	1.1.2.4	Tr (MI)	0	1	0	0	0	0	0
1863	0	1	0	23	Vendeur	20	4950	Ovarian cyst	10.3.6	Tr (Gynéco)	0	1	0	0	0	0	0
1864	0	1	0	21	Etudiant	student	student	Somatoform disorders	5.15.7	Exeat	1	0	0	0	0	0	0
1865	0	1	0	29	Commerçant	20	4950	Poisoning by other medications and drugs	16.11.2	Exeat	1	0	0	0	0	0	0
1866	1	0	0	33	Marin	46	9300	injury and poisoning	16	Exeat	1	0	0	0	0	0	0
1867	0	1	0	35	Commerçant	20	4950	Open wounds of extremities	16.6.2	Tr (Traumato)	0	1	0	0	0	0	0
1868	0	1	0	41	Ménagère	6	4230	Superficial injury; contusion	16.8	Exeat	1	0	0	0	0	0	0
1869	0	1	0	32	Ménagère	6	4230	Inflammatory diseases of female pelvic organs	10.3.2	Tr (Gynéco)	0	1	0	0	0	0	0
1870	0	1	0	32	?	?	?	calculus of kidney	10.1.5.1	Tr (Uro)	0	1	0	0	0	0	0
1871	0	1	0	43	Ménagère	6	4230	Endocrine; nutritional; and metabolic diseases and immunity disorders	3	Exeat	1	0	0	0	0	0	0
1872	0	1	0	32	Vendeur	20	4950	Superficial injury; contusion	16.8	Exeat	1	0	0	0	0	0	0
1873	1	0	0	66	Retraité	retired	retired	Open wounds of extremities	16.6.2	Tr (MI)	0	1	0	0	0	0	0
1874	1	0	0	80	?	?	?	Other inflammatory condition of skin	12.2	Tr (Dermato)	0	1	0	0	0	0	0
1875	0	1	0	46	Cultivateur	42	205	Inguinal hernia	9.5.1	Tr (Viscéral)	0	1	0	0	0	0	0
1876	0	1	0	24	Ménagère	6	4230	Ectopic pregnancy	11.3.1	Tr (Gynéco)	0	1	0	0	0	0	0
1877	0	1	0	19	?	?	?			CED	0	0	0	0	0	1	0
1878	1	0	0	33	Tireur de pousse-pousse	15	9150	Joint disorders and dislocations; trauma-related	16.1	Exeat	1	0	0	0	0	0	0
1879	1	0	0	16	Eleveur de bœufs	42	205	Open wounds of head; neck; and trunk	16.6.1	Tr (Bloc)	0	1	0	0	0	0	0
1880	1	0	0	19	Convoyeur	?	?	Appendicitis and other appendiceal conditions	9.6.1	Tr (Bloc)	0	1	0	0	0	0	0
1881	0	1	0	55	?	?	?	intestinal infection	9.1	Tr (HGE)	0	1	0	0	0	0	0
1882	0	1	0	16	?	?	?	Open wounds of head; neck; and trunk	16.6.1	Tr (Traumato)	0	1	0	0	0	0	0
1883	0	1	0	17	Ecolier	student	student	Mental Illness	5	Exeat	1	0	0	0	0	0	0
1884	0	0	1	2	?	?	?	Intestinal obstruction without hernia	9.6.3	Décès	0	0	0	0	1	0	0
1885	1	0	0	17	Ecolier	student	student	Alcohol-related disorders	5.11	Exeat	1	0	0	0	0	0	0
1886	0	1	0	25	Etudiant	student	student	Other gram negative septicemia	1.1.2.4	Décès	0	0	0	0	1	0	0
1887	0	1	0	29	Réceptionniste	36	5400	Appendicitis and other appendiceal conditions	9.6.1	Tr (Viscéral)	0	1	0	0	0	0	0
1888	0	1	0	19	Etudiant	student	student	Poisoning by other medications and drugs	16.11.2	Exeat	1	0	0	0	0	0	0
1889	1	0	0	20	Etudiant	student	student	Pneumonia (except that caused by TB or STD)	8.1.1	Tr (2P)	0	1	0	0	0	0	0
1890	0	0	1	2	?	?	?	Other injuries and conditions due to external causes	16.12	Exeat	1	0	0	0	0	0	0
1891	0	0	1	8	Ecolier	student	student	Injury and poisoning	16	Exeat	1	0	0	0	0	0	0
1892	0	1	0	22	Secrétaire	53	5700	Somatoform disorders	5.15.7	Exeat	1	0	0	0	0	0	0
1893	0	1	0	18	Etudiant	student	student	Somatoform disorders	5.15.7	Exeat	1	0	0	0	0	0	0
1894	0	0	1	5	?	?	?			Exeat	1	0	0	0	0	0	0
1895	1	0	0	31	Gestionnaire SOCTAM	84	20	heart Failure	7.2.11.2	Tr (Cardio)	0	1	0	0	0	0	0
1896	0	0	1	5	Ecolier	student	student	Injury and poisoning	16	Exeat	1	0	0	0	0	0	0
1897	0	1	0	46	Ménagère	6	4230	Superficial injury; contusion	16.8	Exeat	1	0	0	0	0	0	0
1898	0	0	1	3	Ecolier	student	student	Open wounds of head; neck; and trunk	16.6.1	Exeat	1	0	0	0	0	0	0
1899	0	1	0	20	Ménagère	6	4230	Superficial injury; contusion	16.8	Exeat	1	0	0	0	0	0	0
1900	0	1	0	29	Instituteur	84	2310	Tuberculosis	1.1.1	Tr (2P)	0	1	0	0	0	0	0
1901	0	1	0	17	Ecolier	student	student	Appendicitis and other appendiceal conditions	9.6.1	Tr (Viscéral)	0	1	0	0	0	0	0
1902	1	0	0	18	Vendeur	20	4950	Open wounds of extremities	16.6.2	Exeat	1	0	0	0	0	0	0
1903	0	0	1	10	Ecolier	student	student	Intracranial injury	16.4	Tr (Traumato)	0	1	0	0	0	0	0
1904	1	0	0	36	?	?	?	Open wounds of head; neck; and trunk	16.6.1	Exeat	1	0	0	0	0	0	0
1905	1	0	0	21	Etudiant	student	student	Acute upper respiratory infections of multiple or unspecified sites	8.1.5.1	Exeat	1	0	0	0	0	0	0
1906	1	0	0	16	Ecolier	student	student	Acute appendicitis with abscess or peritonitis	9.6.1.1	Tr (Bloc)	0	1	0	0	0	0	0
1907	0	1	0	17	?	?	?	Diseases of the respiratory system	8	Tr(MI)	0	1	0	0	0	0	0
1908	0	0	1	5	Ecolier	student	student	Intestinal infection	9.1	Tr (Pédiatrie)	0	1	0	0	0	0	0
1909	0	1	0	16	Etudiant	student	student	Open wounds of extremities	16.6.2	Exeat	1	0	0	0	0	0	0
1910	0	1	0	34	Commerçant	20	4950	Open wounds of head; neck; and trunk	16.6.1	Tr (ORLO)	0	1	0	0	0	0	0
1911	1	0	0	24	Etudiant	student	student	Open wounds of head; neck; and trunk	16.6.1	Exeat	1	0	0	0	0	0	0
1912	0	1	0	49	Commerçant	20	4950	Sciatica	13.3.3.4	Exeat	1	0	0	0	0	0	0
1913	1	0	0	19	Receveur de bus	32	9120	Open wounds of head; neck; and trunk	16.6.1	Exeat	1	0	0	0	0	0	0
1914	0	1	0	28	Jardinier	10	4250	Sexually transmitted infections (not HIV or hepatitis)	1.1.3	Tr (Gynéco)	0	1	0	0	0	0	0
1915	0	0	1	6	Ecolier	student	student	Open wounds of head; neck; and trunk	16.6.1	Exeat	1	0	0	0	0	0	0
1916	0	1	0	18	Hôtelier	31	5300	Fracture of lower limb	16.2.4	Tr (Traumato)	0	1	0	0	0	0	0
1917	1	0	0	17	Nomade/religion	unemployed	unemployed	Open wounds of head; neck; and trunk	16.6.1	Exeat	1	0	0	0	0	0	0
1918	1	0	0	40	Vendeur	20	4950	Diseases of the heart	7.2	Tr (Cardio)	0	1	0	0	0	0	0
1919	0	1	0	21	Servante	6	4230	injury and poisoning	16	Tr (ORLO)	0	1	0	0	0	0	0
1920	0	1	0	42	Ménagère	6	4230	Somatoform disorders	5.15.7	Tr (Neuro)	0	1	0	0	0	0	0
1921	0	1	0	15	?	?	?	Somatoform disorders	5.15.7	Exeat	1	0	0	0	0	0	0
1922	0	1	0	26	Ménagère	6	4230	Open wounds of extremities	16.6.2	Exeat	1	0	0	0	0	0	0
1923	0	1	0	30	Vendeur	20	4950	Gastrointestinal hemorrhage	9.10.0	Tr (HGE)	0	1	0	0	0	0	0
1924	0	0	1	6	Ecolier	student	student	Sprains and strains	16.7	Exeat	1	0	0	0	0	0	0
1925	0	0	1	13	?	?	?	Superficial injury; contusion	16.8	Exeat	1	0	0	0	0	0	0
1926	0	1	0	16	Ménagère	6	4230	Other infections; including parasitic	1.4	Tr (CME)	0	1	0	0	0	0	0
1927	0	1	0	67	Cultivateur	42	205	Acute cerebrovascular disease	7.3.1	Tr (Neuro-psy)	0	1	0	0	0	0	0
1928	0	1	0	19	Cultivateur	42	205	Appendicitis and other appendiceal conditions	9.6.1	Tr (Bloc)	0	1	0	0	0	0	0
1929	0	1	0	27	Agent OTIV	78	950	Nonrheumatic mitral valve disorders	7.2.1.2	Exeat	1	0	0	0	0	0	0
1930	0	1	0	45	Ménagère	6	4230	Superficial injury; contusion	16.8	Exeat	1	0	0	0	0	0	0
1931	0	1	0	25	Commerçant	20	4950	Other gram negative septicemia	1.1.2.4	Tr (MI)	0	1	0	0	0	0	0
1932	1	0	0	54	Marin	46	9300	Fracture of lower limb	16.2.4	Décharge	0	0	1	0	0	0	0
1933	0	1	0	62	Ménagère	6	4230	Hypertension with complications and secondary hypertension	7.1.2	Tr (Cardio)	0	1	0	0	0	0	0
1934	0	0	1	11	Ecolier	student	student	Superficial injury; contusion	16.8	Exeat	1	0	0	0	0	0	0
1935	1	0	0	20	Tireur de pousse-pousse	15	9150	Open wounds of head; neck; and trunk	16.6.1	Exeat	1	0	0	0	0	0	0
1936	1	0	0	19	Etudiant	student	student	Open wounds of extremities	16.6.2	Exeat	1	0	0	0	0	0	0
1937	0	1	0	28	Vendeur	20	4950	Burns	16.9	Exeat	1	0	0	0	0	0	0
1938	0	1	0	19	Ménagère	6	4230	Somatoform disorders	5.15.7	Exeat	1	0	0	0	0	0	0
1939	0	1	0	19	Animatrice SIDA	41	2760	Ovarian cyst	10.3.6	Tr (Gynéco)	0	1	0	0	0	0	0
1940	0	1	0	22	Etudiant	student	student	Appendicitis and other appendiceal conditions	9.6.1	Tr (Bloc)	0	1	0	0	0	0	0
1941	0	0	1	12	Ecolier	student	student	abdominal pain	17.1.7	Exeat	1	0	0	0	0	0	0
1942	0	0	1	10	Ecolier	student	student	Peritonitis and intestinal abscess	9.6.6	Tr (Bloc)	0	1	0	0	0	0	0
1943	0	1	0	19	?	?	?	Poisoning by other medications and drugs	16.11.2	Exeat	1	0	0	0	0	0	0
1944	1	0	0	35	Charpentier	28	6230	Somatoform disorders	5.15.7	Exeat	1	0	0	0	0	0	0
1945	0	1	0	21	Etudiant	student	student	Superficial injury; contusion	16.8	Exeat	1	0	0	0	0	0	0
1946	1	0	0	17	Vendeur	20	4950	Superficial injury; contusion	16.8	Exeat	1	0	0	0	0	0	0
1947	1	0	0	26	Photographe	48	2910	Open wounds of extremities	16.6.2	Exeat	1	0	0	0	0	0	0
1948	1	0	0	38	Affairiste	?	?	mood disorders	5.8	Tr (Neuro-psy)	0	1	0	0	0	0	0
1949	0	1	0	29	Femme de ménage	6	4230	Superficial injury; contusion	16.8	Exeat	1	0	0	0	0	0	0
1950	1	0	0	35	Pénitencier	57	3800	Alcohol-related disorders	5.11	Décès	0	0	0	0	1	0	0
1951	0	1	0	16	Ménagère	6	4230	Lower gastrointestinal disorders	9.6	Décharge	0	0	1	0	0	0	0
1952	0	1	0	30	Ménagère	6	4230	intestinal infection	9.1	Décharge	0	0	1	0	0	0	0
1953	1	0	0	29	Chômeur	unemployed	unemployed	Abdominal pain	17.1.7	Tr (HGE)	0	1	0	0	0	0	0
1954	1	0	0	36	Gardien	39	3930	Alcohol-related disorders	5.11	Exeat	1	0	0	0	0	0	0
1955	0	0	1	1.16667	?	?	?			CED	0	0	0	0	0	1	0
1956	1	0	0	23	Gendarme	78	3850	Open wounds of extremities	16.6.2	Exeat	1	0	0	0	0	0	0
1957	1	0	0	40	Cultivateur	42	205	Other fracture of lower limb	16.2.4.3	Décharge	0	0	1	0	0	0	0
1958	0	1	0	33	Ménagère	6	4230	Cardiomyopathy	7.2.2.1	Tr (Cardio)	0	1	0	0	0	0	0
1959	0	1	0	22	Couturière	22	8350	Superficial injury; contusion	16.8	Exeat	1	0	0	0	0	0	0
1960	0	1	0	50	Ménagère	6	4230	Tuberculosis	1.1.1	Décharge	0	0	1	0	0	0	0
1961	1	0	0	18	Puiseur d'eau	7	6050	poisoning by nonmedicinal substances	16.11.3	Exeat	1	0	0	0	0	0	0
1962	0	1	0	19	Ménagère	6	4230	poisoning by nonmedicinal substances	16.11.3	Evadé	0	0	0	1	0	0	0
1963	1	0	0	39	Transporteur	38	9130	Open wounds of head; neck; and trunk	16.6.1	Exeat	1	0	0	0	0	0	0
1964	0	0	1	9	Ecolier	student	student	Inguinal hernia	9.5.1	Tr (Viscéral)	0	1	0	0	0	0	0
1965	1	0	0	34	Marin	46	9300	Open wounds of extremities	16.6.2	Exeat	1	0	0	0	0	0	0
1966	1	0	0	25	Cultivateur	42	205	Open wounds of head; neck; and trunk	16.6.1	Tr (Traumato)	0	1	0	0	0	0	0
1967	1	0	0	28	Militaire	military	military	Skull and face fractures	16.2.2	Tr (Traumato)	0	1	0	0	0	0	0
1968	1	0	0	44	Pêcheur	23	6100	Chronic ulcer of leg or foot	12.3.2	Tr (Traumato)	0	1	0	0	0	0	0
1969	1	0	0	44	Chômeur	unemployed	unemployed	Coma; stupor; and brain damage	6.6	Décès	0	0	0	0	1	0	0
1970	1	0	0	33	?	?	?	Open wounds of head; neck; and trunk	16.6.1	Exeat	1	0	0	0	0	0	0
1971	1	0	0	42	Marin	46	9300	retention of urine	10.1.8.2	Tr (Uro)	0	1	0	0	0	0	0
1972	1	0	0	18	Tireur de pousse-pousse	15	9150	Superficial injury; contusion	16.8	Exeat	1	0	0	0	0	0	0
1973	0	1	0	55	Ménagère	6	4230	Cardiomyopathy	7.2.2.1	Tr (Cardio)	0	1	0	0	0	0	0
1974	1	0	0	28	Policier	78	3850	Superficial injury; contusion	16.8	Exeat	1	0	0	0	0	0	0
1975	0	1	0	18	Ecolier	student	student	intestinal infection	9.1	Tr (MI)	0	1	0	0	0	0	0
1976	0	1	0	20	Ménagère	6	4230	Poisoning by other medications and drugs	16.11.2	Exeat	1	0	0	0	0	0	0
1977	0	1	0	60	Secrétaire	53	5700	Occlusion of cerebral arteries	7.3.1.2	Décharge	0	0	1	0	0	0	0
1978	0	1	0	46	Vendeur	20	4950	Infectious and parasitic diseases	1	Tr (MI)	0	1	0	0	0	0	0
1979	1	0	0	54	Fonctionnaire	65	2025	Other fractures	16.2.5	Tr (Traumato)	0	1	0	0	0	0	0
1980	1	0	0	38	Cultivateur	42	205	Fracture of upper limb	16.2.3	Décharge	0	0	1	0	0	0	0
1981	0	0	1	7	Ecolier	student	student	Open wounds of extremities	16.6.2	Exeat	1	0	0	0	0	0	0
1982	1	0	0	35	Menuisier	28	6230	Open wounds	16.6	Exeat	1	0	0	0	0	0	0
1983	1	0	0	60	Enseignant	84	2310	convulsions	6.4.2	Tr (Neuro-psy)	0	1	0	0	0	0	0
1984	1	0	0	40	?	?	?			CED	0	0	0	0	0	1	0
1985	1	0	0	19	?	?	?	Intracranial injury	16.4	Exeat	1	0	0	0	0	0	0
1986	1	0	0	19	?	?	?	Open wounds	16.6	Exeat	1	0	0	0	0	0	0
1987	1	0	0	60	?	?	?	Superficial injury; contusion	16.8	Exeat	1	0	0	0	0	0	0
1988	1	0	0	34	Cultivateur	42	205	Intracranial injury	16.4	Exeat	1	0	0	0	0	0	0
1989	0	1	0	16	Ménagère	6	4230	Shock	17.1.5	Décès	0	0	0	0	1	0	0
1990	0	1	0	24	?	?	?	poisoning by nonmedicinal substances	16.11.3	Evadé	0	0	0	1	0	0	0
1991	0	1	0	30	Ménagère	6	4230	Open wounds of extremities	16.6.2	Exeat	1	0	0	0	0	0	0
1992	1	0	0	29	Cultivateur	42	205	Other infections; including parasitic	1.4	Tr (MI)	0	1	0	0	0	0	0
1993	0	1	0	15	Ecolier	student	student	Poisoning	16.11	Exeat	1	0	0	0	0	0	0
1994	1	0	0	76	?	?	?	Symptoms; signs; and ill-defined conditions	17.1	Tr (Cardio)	0	1	0	0	0	0	0
1995	1	0	0	21	Etudiant	student	student	Superficial injury; contusion	16.8	Exeat	1	0	0	0	0	0	0
1996	0	1	0	35	Ménagère	6	4230	Ectopic pregnancy	11.3.1	Tr (Gynéco)	0	1	0	0	0	0	0
1997	0	1	0	56	Infirmière (Major HGE)	84	3255	Somatoform disorders	5.15.7	Exeat	1	0	0	0	0	0	0
1998	1	0	0	23	Etudiant	student	student	Fluid and electrolyte disorders	3.8	Exeat	1	0	0	0	0	0	0
1999	1	0	0	50	Gestionnaire	84	20	Fracture of radius and ulna	16.2.3.2	Tr (Traumato)	0	1	0	0	0	0	0
[truncated: 3,277 more rows]

## Sheet: Trauma
CCS CATEGORY	CCS CODE
Injury and poisoning	16
Joint disorders and dislocations; trauma-related	16.1
Fractures	16.2
Fracture of neck of femur (hip)	16.2.1
Skull and face fractures	16.2.2
Fracture of upper limb	16.2.3
Fracture of humerus	16.2.3.1
Fracture of radius and ulna	16.2.3.2
Other fracture of upper limb	16.2.3.3
Fracture of lower limb	16.2.4
Fracture of tibia and fibula	16.2.4.1
Fracture of ankle	16.2.4.2
Other fracture of lower limb	16.2.4.3
Other fractures	16.2.5
Fracture of vertebral column without mention of spinal cord injury	16.2.5.1
Fracture of ribs; closed	16.2.5.2
Fracture of pelvis	16.2.5.3
Other and unspecified fracture	16.2.5.4
Spinal cord injury	16.3
Intracranial injury	16.4
Concussion	16.4.1
Other intracranial injury	16.4.2
Crushing injury or internal injury	16.5
Open wounds	16.6
Open wounds of head; neck; and trunk	16.6.1
Open wounds of extremities	16.6.2
Sprains and strains	16.7
Superficial injury; contusion	16.8
Burns	16.9
Complications	16.10.0
Complication of device; implant or graft	16.10.1
Malfunction of device; implant; and graft	16.10.1.1
Cardiac complications	16.10.2.1
Respiratory complications	16.10.2.2
Gastrointestinal complications	16.10.2.3
Urinary complications	16.10.2.4
Hemorrhage or hematoma complicating a procedure	16.10.2.5
Other complications of surgical and medical procedures	16.10.2.7
Other injuries and conditions due to external causes	16.12

## Sheet: Infectious
CCS CATEGORY	CCS CODE
Infectious and parasitic diseases	1
Bacterial infection	1.1
Tuberculosis	1.1.1
Septicemia (except in labor)	1.1.2
Streptococcal septicemia	1.1.2.1
Staphylococcal septicemia	1.1.2.2
E Coli septicemia	1.1.2.3
Other gram negative septicemia	1.1.2.4
Other specified septicemia	1.1.2.5
Unspecified septicemia	1.1.2.6
Sexually transmitted infections (not HIV or hepatitis)	1.1.3
Other bacterial infections	1.1.4
Mycoses	1.2
Candidiasis of the mouth (thrush)	1.2.1
Other mycoses	1.2.2
Viral infection	1.3
HIV infection	1.3.1
Hepatitis	1.3.2
Other viral infections	1.3.3
Herpes zoster infection	1.3.3.1
Herpes simplex infection	1.3.3.2
Other and unspecified viral infection	1.3.3.3
Other infections; including parasitic	1.4
Immunizations and screening for infectious disease	1.5
Central nervous system infection	6.1
Meningitis (except that caused by TB or STD)	6.1.1
Encephalitis (except that caused by TB or STD)	6.1.2
Other CNS infection and poliomyelitis	6.1.3
Inflammation; infection of eye (except that caused by TB or STD)	6.7.5
Otitis media and related conditions	6.8.1
Suppurative and unspecified otitis media	6.8.1.1
Other otitis media and related conditions	6.8.1.2
Peri-; endo-; and myocarditis; cardiomyopathy (except that caused by TB or STD)	7.2.2
Other peri-; endo-; and myocarditis	7.2.2.2
Respiratory infections	8.1
Pneumonia (except that caused by TB or STD)	8.1.1
Pneumococcal pneumonia	8.1.1.1
Other bacterial pneumonia	8.1.1.2
Pneumonia; organism unspecified	8.1.1.3
Other pneumonia	8.1.1.4
Influenza	8.1.2
Acute and chronic tonsillitis	8.1.3
Acute bronchitis	8.1.4
Other upper respiratory infections	8.1.5
Acute upper respiratory infections of multiple or unspecified sites	8.1.5.1
Chronic sinusitis	8.1.5.2
Croup	8.1.5.3
Other and unspecified upper respiratory infections	8.1.5.4
Intestinal infection	9.1
Appendicitis and other appendiceal conditions	9.6.1
Acute appendicitis with abscess or peritonitis	9.6.1.1
Acute appendicitis without abscess or peritonitis	9.6.1.2
Acute appendicitis; not otherwise specified	9.6.1.3
Diverticulosis and diverticulitis	9.6.4
Diverticulitis	9.6.4.2
Peritonitis and intestinal abscess	9.6.6
Cholelithiasis with acute cholecystitis	9.7.1
Cholelithiasis with other cholecystitis	9.7.2
Cholecystitis without cholelithiasis	9.7.5
Liver abscess and sequelae of chronic liver disease	9.8.2.2
Urinary tract infections	10.1.4
Infections of kidney	10.1.4.1
Cystitis and urethritis	10.1.4.2
Urinary tract infection; site not specified	10.1.4.3
Cervicitis and endocervicitis	10.3.2.2
Pelvic inflammatory disease (PID)	10.3.2.3
Skin and subcutaneous tissue infections	12.1
Cellulitis and abscess	12.1.1
Cellulitis and abscess of fingers and toes	12.1.1.1
Cellulitis and abscess of face	12.1.1.2
Cellulitis and abscess of arm	12.1.1.3
Cellulitis and abscess of hand	12.1.1.4
Cellulitis and abscess of leg	12.1.1.5
Cellulitis and abscess of foot	12.1.1.6
Other cellulitis and abscess	12.1.1.7
Other skin and subcutaneous infections	12.1.2
Infective arthritis and osteomyelitis (except that caused by TB or STD)	13.1
Infection and inflammation--internal prosthetic device; implant; and graft	16.10.1.2
Complications of surgical procedures or medical care	16.10.2
Postoperative infection	16.10.2.6
Lymphadenitis	17.1.3
Gangrene	17.1.4
Infectious and parasitic complications in mother affecting pregnancy	11.3.7.6
Infection of amniotic cavity	11.4.5.2
Infections specific to the perinatal period	15.7.2

## Sheet: Mental Health
CCS CATEGORY	CCS CODE
Mental Illness	5
Adjustment disorders	5.1
Anxiety disorders	5.2
Attention deficit conduct and disruptive behavior disorders	5.3
Conduct disorder	5.3.1
Oppositional defiant disorder	5.3.2
Attention deficit disorder and Attention deficit hyperactivity disorder	5.3.3
Delirium dementia and amnestic and other cognitive disorders	5.4
Developmental disorders	5.5
Communication disorders	5.5.1
Developmental disabilities	5.5.2
Intellectual disabilities	5.5.3
Learning disorders	5.5.4
Motor skill disorders	5.5.5
Disorders usually diagnosed in infancy childhood or adolescence	5.6
Elimination disorders	5.6.1
Other disorders of infancy childhood or adolescence	5.6.2
Pervasive developmental disorders	5.6.3
Tic disorders	5.6.4
Impulse control disorders not elsewhere classified	5.7
Mood disorders	5.8
Bipolar disorders	5.8.1
Depressive disorders	5.8.2
Personality disorders	5.9
Schizophrenia and other psychotic disorders	5.10.0
Alcohol-related disorders	5.11
Substance-related disorders	5.12
Suicide and intentional self-inflicted injury	5.13
Screening and history of mental health and substance abuse codes	5.14
Codes related to mental health disorders	5.14.1
Codes related to substance-related disorders	5.14.2
Miscellaneous mental disorders	5.15
Dissociative disorders	5.15.1
Eating disorders	5.15.2
Factitious disorders	5.15.3
Psychogenic disorders	5.15.4
Sexual and gender identity disorders	5.15.5
Sleep disorders	5.15.6
Somatoform disorders	5.15.7
Mental disorders due to general medical conditions not elsewhere classified	5.15.8
Other miscellaneous mental conditions	5.15.9
Poisoning	16.11
Poisoning by psychotropic agents	16.11.1
Poisoning by other medications and drugs	16.11.2
Poisoning by nonmedicinal substances	16.11.3

## Sheet: Neoplasm
CCS CATEGORY	CCS CODE
Neoplasms	2
Colorectal cancer	2.1
Cancer of colon	2.1.1
Cancer of rectum and anus	2.1.2
Other gastrointestinal cancer	2.2
Cancer of esophagus	2.2.1
Cancer of stomach	2.2.2
Cancer of liver and intrahepatic bile duct	2.2.3
Cancer of pancreas	2.2.4
Cancer of other GI organs; peritoneum	2.2.5
Cancer of bronchus; lung	2.3
Cancer of skin	2.4
Melanomas of skin	2.4.1
Other non-epithelial cancer of skin	2.4.2
Cancer of breast	2.5
Cancer of uterus and cervix	2.6
Cancer of uterus	2.6.1
Cancer of cervix	2.6.2
Cancer of ovary and other female genital organs	2.7
Cancer of ovary	2.7.1
Cancer of other female genital organs	2.7.2
Cancer of male genital organs	2.8
Cancer of prostate	2.8.1
Cancer of testis	2.8.2
Cancer of other male genital organs	2.8.3
Cancer of urinary organs	2.9
Cancer of bladder	2.9.1
Cancer of kidney and renal pelvis	2.9.2
Cancer of other urinary organs	2.9.3
Cancer of lymphatic and hematopoietic tissue	2.10.0
Hodgkins disease	2.10.1
Non-Hodgkins lymphoma	2.10.2
Leukemias	2.10.3
Multiple myeloma	2.10.4
Cancer; other primary	2.11
Cancer of head and neck	2.11.1
Cancer; other respiratory and intrathoracic	2.11.2
Cancer of bone and connective tissue	2.11.3
Cancer of brain and nervous system	2.11.4
Cancer of thyroid	2.11.5
Cancer; other and unspecified primary	2.11.6
Secondary malignancies	2.12
Secondary malignancy of lymph nodes	2.12.1
Secondary malignancy of lung	2.12.2
Secondary malignancy of liver	2.12.3
Secondary malignancy of brain/spine	2.12.4
Secondary malignancy of bone	2.12.5
Other secondary malignancy	2.12.6
Malignant neoplasm without specification of site	2.13
Neoplasms of unspecified nature or uncertain behavior	2.14
Maintenance chemotherapy; radiotherapy	2.15
Radiotherapy	2.15.1
Chemotherapy	2.15.2
Benign neoplasms	2.16
Benign neoplasm of uterus	2.16.1
Other and unspecified benign neoplasm	2.16.2
Benign neoplasm of ovary	2.16.2.1
Benign neoplasm of colon	2.16.2.2
Benign neoplasm of the thyroid	2.16.2.3
Benign neoplasm of cerebral meninges	2.16.2.4
Other and unspecified benign neoplasms	2.16.2.5

## Sheet: CCS multi-level
2011 categories	2011 codes	tracking number	single-level
Infectious and parasitic diseases	1	1
Bacterial infection	1.1	2
Tuberculosis	1.1.1	3	1
Septicemia (except in labor)	1.1.2	4	2
Streptococcal septicemia	1.1.2.1	5
Staphylococcal septicemia	1.1.2.2	6
E Coli septicemia	1.1.2.3	7
Other gram negative septicemia	1.1.2.4	8
Other specified septicemia	1.1.2.5	9
Unspecified septicemia	1.1.2.6	10
Sexually transmitted infections (not HIV or hepatitis)	1.1.3	11	9
Other bacterial infections	1.1.4	12	3
Mycoses	1.2	13	4
Candidiasis of the mouth (thrush)	1.2.1	14
Other mycoses	1.2.2	15
Viral infection	1.3	16
HIV infection	1.3.1	17	5
Hepatitis	1.3.2	18	6
Other viral infections	1.3.3	19	7
Herpes zoster infection	1.3.3.1	20
Herpes simplex infection	1.3.3.2	21
Other and unspecified viral infection	1.3.3.3	22
Other infections; including parasitic	1.4	23	8
Immunizations and screening for infectious disease	1.5	24	10
Neoplasms	2	25
Colorectal cancer	2.1	26
Cancer of colon	2.1.1	27	14
Cancer of rectum and anus	2.1.2	28	15
Other gastrointestinal cancer	2.2	29
Cancer of esophagus	2.2.1	30	12
Cancer of stomach	2.2.2	31	13
Cancer of liver and intrahepatic bile duct	2.2.3	32	16
Cancer of pancreas	2.2.4	33	17
Cancer of other GI organs; peritoneum	2.2.5	34	18
Cancer of bronchus; lung	2.3	35	19
Cancer of skin	2.4	36
Melanomas of skin	2.4.1	37	22
Other non-epithelial cancer of skin	2.4.2	38	23
Cancer of breast	2.5	39	24
Cancer of uterus and cervix	2.6	40
Cancer of uterus	2.6.1	41	25
Cancer of cervix	2.6.2	42	26
Cancer of ovary and other female genital organs	2.7	43
Cancer of ovary	2.7.1	44	27
Cancer of other female genital organs	2.7.2	45	28
Cancer of male genital organs	2.8	46
Cancer of prostate	2.8.1	47	29
Cancer of testis	2.8.2	48	30
Cancer of other male genital organs	2.8.3	49	31
Cancer of urinary organs	2.9	50
Cancer of bladder	2.9.1	51	32
Cancer of kidney and renal pelvis	2.9.2	52	33
Cancer of other urinary organs	2.9.3	53	34
Cancer of lymphatic and hematopoietic tissue	2.10.0	54
Hodgkins disease	2.10.1	55	37
Non-Hodgkins lymphoma	2.10.2	56	38
Leukemias	2.10.3	57	39
Multiple myeloma	2.10.4	58	40
Cancer; other primary	2.11	59
Cancer of head and neck	2.11.1	60	11
Cancer; other respiratory and intrathoracic	2.11.2	61	20
Cancer of bone and connective tissue	2.11.3	62	21
Cancer of brain and nervous system	2.11.4	63	35
Cancer of thyroid	2.11.5	64	36
Cancer; other and unspecified primary	2.11.6	65	41
Secondary malignancies	2.12	66	42
Secondary malignancy of lymph nodes	2.12.1	67
Secondary malignancy of lung	2.12.2	68
Secondary malignancy of liver	2.12.3	69
Secondary malignancy of brain/spine	2.12.4	70
Secondary malignancy of bone	2.12.5	71
Other secondary malignancy	2.12.6	72
Malignant neoplasm without specification of site	2.13	73	43
Neoplasms of unspecified nature or uncertain behavior	2.14	74	44
Maintenance chemotherapy; radiotherapy	2.15	75	45
Radiotherapy	2.15.1	76
Chemotherapy	2.15.2	77
Benign neoplasms	2.16	78
Benign neoplasm of uterus	2.16.1	79	46
Other and unspecified benign neoplasm	2.16.2	80	47
Benign neoplasm of ovary	2.16.2.1	81
Benign neoplasm of colon	2.16.2.2	82
Benign neoplasm of the thyroid	2.16.2.3	83
Benign neoplasm of cerebral meninges	2.16.2.4	84
Other and unspecified benign neoplasms	2.16.2.5	85
Endocrine; nutritional; and metabolic diseases and immunity disorders	3	86
Thyroid disorders	3.1	87	48
Thyrotoxicosis with or without goiter	3.1.1	88
Other thyroid disorders	3.1.2	89
Diabetes mellitus without complication	3.2	90	49
Diabetes mellitus with complications	3.3	91	50
Diabetes with ketoacidosis or uncontrolled diabetes	3.3.1	92
Diabetes with renal manifestations	3.3.2	93
Diabetes with ophthalmic manifestations	3.3.3	94
Diabetes with neurological manifestations	3.3.4	95
Diabetes with circulatory manifestations	3.3.5	96
Diabetes with unspecified complications	3.3.6	97
Diabetes with other manifestations	3.3.7	98
Other endocrine disorders	3.4	99	51
Nutritional deficiencies	3.5	100	52
Unspecified protein-calorie malnutrition	3.5.1	101
Other malnutrition	3.5.2	102
Disorders of lipid metabolism	3.6	103	53
Gout and other crystal arthropathies	3.7	104	54
Fluid and electrolyte disorders	3.8	105	55
Hyposmolality	3.8.1	106
Hypovolemia	3.8.2	107
Hyperpotassemia	3.8.3	108
Hypopotassemia	3.8.4	109
Other fluid and electrolyte disorders	3.8.5	110
Cystic fibrosis	3.9	111	56
Immunity disorders	3.10.0	112	57
Other nutritional; endocrine; and metabolic disorders	3.11	113	58
Disorders of mineral metabolism	3.11.1	114
Obesity	3.11.2	115
Other and unspecified metabolic; nutritional; and endocrine disorders	3.11.3	116
Diseases of the blood and blood-forming organs	4	117
Anemia	4.1	118
Acute posthemorrhagic anemia	4.1.1	119	60
Sickle cell anemia	4.1.2	120	61
Deficiency and other anemia	4.1.3	121	59
Iron deficiency anemia	4.1.3.1	122
Other deficiency anemia	4.1.3.2	123
Aplastic anemia	4.1.3.3	124
Chronic blood loss anemia	4.1.3.4	125
Acquired hemolytic anemia	4.1.3.5	126
Other specified anemia	4.1.3.6	127
Anemia; unspecified	4.1.3.7	128
Coagulation and hemorrhagic disorders	4.2	129	62
Coagulation defects	4.2.1	130
Thrombocytopenia	4.2.2	131
Other coagulation and hemorrhagic disorders	4.2.3	132
Diseases of white blood cells	4.3	133	63
Other hematologic conditions	4.4	134	64
Mental Illness	5	135
Adjustment disorders	5.1	136	650
Anxiety disorders	5.2	137	651
Attention deficit conduct and disruptive behavior disorders	5.3	138	652
Conduct disorder	5.3.1	139	6521
Oppositional defiant disorder	5.3.2	140	6522
Attention deficit disorder and Attention deficit hyperactivity disorder	5.3.3	141	6523
Delirium dementia and amnestic and other cognitive disorders	5.4	142	653
Developmental disorders	5.5	143	654
Communication disorders	5.5.1	144	6541
Developmental disabilities	5.5.2	145	6542
Intellectual disabilities	5.5.3	146	6543
Learning disorders	5.5.4	147	6544
Motor skill disorders	5.5.5	148	6545
Disorders usually diagnosed in infancy childhood or adolescence	5.6	149	655
Elimination disorders	5.6.1	150	6551
Other disorders of infancy childhood or adolescence	5.6.2	151	6552
Pervasive developmental disorders	5.6.3	152	6553
Tic disorders	5.6.4	153	6554
Impulse control disorders not elsewhere classified	5.7	154	656
Mood disorders	5.8	155	657
Bipolar disorders	5.8.1	156	6571
Depressive disorders	5.8.2	157	6572
Personality disorders	5.9	158	658
Schizophrenia and other psychotic disorders	5.10.0	159	659
Alcohol-related disorders	5.11	160	660
Substance-related disorders	5.12	161	661
Suicide and intentional self-inflicted injury	5.13	162	662
Screening and history of mental health and substance abuse codes	5.14	163	663
Codes related to mental health disorders	5.14.1	164	6631
Codes related to substance-related disorders	5.14.2	165	6632
Miscellaneous mental disorders	5.15	166	670
Dissociative disorders	5.15.1	167	6701
Eating disorders	5.15.2	168	6702
Factitious disorders	5.15.3	169	6703
Psychogenic disorders	5.15.4	170	6704
Sexual and gender identity disorders	5.15.5	171	6705
Sleep disorders	5.15.6	172	6706
Somatoform disorders	5.15.7	173	6707
Mental disorders due to general medical conditions not elsewhere classified	5.15.8	174	6708
Other miscellaneous mental conditions	5.15.9	175	6709
Diseases of the nervous system and sense organs	6	176
Central nervous system infection	6.1	177
Meningitis (except that caused by TB or STD)	6.1.1	178	76
Encephalitis (except that caused by TB or STD)	6.1.2	179	77
Other CNS infection and poliomyelitis	6.1.3	180	78
Hereditary and degenerative nervous system conditions	6.2	181
Parkinsons disease	6.2.1	182	79
Multiple sclerosis	6.2.2	183	80
Other hereditary and degenerative nervous system conditions	6.2.3	184	81
Disorders of the autonomic nervous system	6.2.3.1	185
Other and unspecified hereditary and degenerative nervous conditions	6.2.3.2	186
Paralysis	6.3	187	82
Hemiplegia	6.3.1	188
Other paralysis	6.3.2	189
Epilepsy; convulsions	6.4	190	83
Epilepsy	6.4.1	191
Convulsions	6.4.2	192
Headache; including migraine	6.5	193	84
Migraine	6.5.1	194
Other headache	6.5.2	195
Coma; stupor; and brain damage	6.6	196	85
Eye disorders	6.7	197
Cataract	6.7.1	198	86
Retinal detachments; defects; vascular occlusion; and retinopathy	6.7.2	199	87
Retinal detachment with defect	6.7.2.1	200
Other retinal detachment or defect	6.7.2.2	201
Other retinal disorders	6.7.2.3	202
Glaucoma	6.7.3	203	88
Blindness and vision defects	6.7.4	204	89
Inflammation; infection of eye (except that caused by TB or STD)	6.7.5	205	90
Other eye disorders	6.7.6	206	91
Ear conditions	6.8	207
Otitis media and related conditions	6.8.1	208	92
Suppurative and unspecified otitis media	6.8.1.1	209
Other otitis media and related conditions	6.8.1.2	210
Conditions associated with dizziness or vertigo	6.8.2	211	93
Other ear and sense organ disorders	6.8.3	212	94
Other nervous system disorders	6.9	213	95
Disorders of the peripheral nervous system	6.9.1	214
Other central nervous system disorders	6.9.2	215
Other nervous system symptoms and disorders	6.9.3	216
Diseases of the circulatory system	7	217
Hypertension	7.1	218
Essential hypertension	7.1.1	219	98
Hypertension with complications and secondary hypertension	7.1.2	220	99
Hypertensive heart and/or renal disease	7.1.2.1	221
Other hypertensive complications	7.1.2.2	222
Diseases of the heart	7.2	223
Heart valve disorders	7.2.1	224	96
Chronic rheumatic disease of the heart valves	7.2.1.1	225
Nonrheumatic mitral valve disorders	7.2.1.2	226
Nonrheumatic aortic valve disorders	7.2.1.3	227
Other heart valve disorders	7.2.1.4	228
Peri-; endo-; and myocarditis; cardiomyopathy (except that caused by TB or STD)	7.2.2	229
Cardiomyopathy	7.2.2.1	230
Other peri-; endo-; and myocarditis	7.2.2.2	231
Acute myocardial infarction	7.2.3	232	100
Coronary atherosclerosis and other heart disease	7.2.4	233	101
Angina pectoris	7.2.4.1	234
Unstable angina (intermediate coronary syndrome)	7.2.4.2	235
Other acute and subacute forms of ischemic heart disease	7.2.4.3	236
Coronary atherosclerosis	7.2.4.4	237
Other forms of chronic heart disease	7.2.4.5	238
Nonspecific chest pain	7.2.5	239	102
Pulmonary heart disease	7.2.6	240	103
Other and ill-defined heart disease	7.2.7	241	104
Conduction disorders	7.2.8	242	105
Atrioventricular block	7.2.8.1	243
Bundle branch block	7.2.8.2	244
Anomalous atrioventricular excitation	7.2.8.3	245
Other conduction disorders	7.2.8.4	246
Cardiac dysrhythmias	7.2.9	247	106
Paroxysmal supraventricular tachycardia	7.2.9.1	248
Paroxysmal ventricular tachycardia	7.2.9.2	249
Atrial fibrillation	7.2.9.3	250
Atrial flutter	7.2.9.4	251
Premature beats	7.2.9.5	252
Sinoatrial node dysfunction	7.2.9.6	253
Other cardiac dysrhythmias	7.2.9.7	254
Cardiac arrest and ventricular fibrillation	7.2.10	255	107
Congestive heart failure; nonhypertensive	7.2.11	256	108
Congestive heart failure	7.2.11.1	257
Heart failure	7.2.11.2	258
Cerebrovascular disease	7.3	259
Acute cerebrovascular disease	7.3.1	260	109
Intracranial hemorrhage	7.3.1.1	261
Occlusion of cerebral arteries	7.3.1.2	262
Acute but ill-defined cerebrovascular accident	7.3.1.3	263
Occlusion or stenosis of precerebral arteries	7.3.2	264	110
Other and ill-defined cerebrovascular disease	7.3.3	265	111
Transient cerebral ischemia	7.3.4	266	112
Late effects of cerebrovascular disease	7.3.5	267	113
Diseases of arteries; arterioles; and capillaries	7.4	268
Peripheral and visceral atherosclerosis	7.4.1	269	114
Atherosclerosis of arteries of extremities	7.4.1.1	270
Peripheral vascular disease unspecified	7.4.1.2	271
Other peripheral and visceral atherosclerosis HCUP CCS 11/11/10 32	7.4.1.3	272
Aortic; peripheral; and visceral artery aneurysms	7.4.2	273	115
Abdominal aortic aneurysm; without rupture	7.4.2.1	274
Other aneurysm	7.4.2.2	275
Aortic and peripheral arterial embolism or thrombosis	7.4.3	276	116
Arterial embolism and thrombosis of lower extremity artery	7.4.3.1	277
Other arterial embolism and thrombosis	7.4.3.2	278
Other circulatory disease	7.4.4	279	117
Hypotension	7.4.4.1	280
Other and unspecified circulatory disease	7.4.4.2	281
Diseases of veins and lymphatics	7.5	282
Phlebitis; thrombophlebitis and thromboembolism	7.5.1	283	118
Phlebitis and thrombophlebitis	7.5.1.1	284
Other venous embolism and thrombosis	7.5.1.2	285
Varicose veins of lower extremity	7.5.2	286	119
Hemorrhoids	7.5.3	287	120
Other diseases of veins and lymphatics	7.5.4	288	121
Diseases of the respiratory system	8	289
Abdominal aortic aneurysm; without rupture	8.1	290
Pneumonia (except that caused by TB or STD)	8.1.1	291	122
Pneumococcal pneumonia	8.1.1.1	292
Other bacterial pneumonia	8.1.1.2	293
Pneumonia; organism unspecified	8.1.1.3	294
Other pneumonia	8.1.1.4	295
Influenza	8.1.2	296	123
Acute and chronic tonsillitis	8.1.3	297	124
Acute bronchitis	8.1.4	298	125
Other upper respiratory infections	8.1.5	299	126
Acute upper respiratory infections of multiple or unspecified sites	8.1.5.1	300
Chronic sinusitis	8.1.5.2	301
Croup	8.1.5.3	302
Other and unspecified upper respiratory infections	8.1.5.4	303
Chronic obstructive pulmonary disease and bronchiectasis	8.2	304	127
Emphysema	8.2.1	305
Chronic airway obstruction; not otherwise specified	8.2.2	306
Obstructive chronic bronchitis	8.2.3	307
Other chronic pulmonary disease	8.2.4	308
Asthma	8.3	309	128
Chronic obstructive asthma	8.3.1	310
Chronic obstructive asthma without status asthmaticus or exacerbation	8.3.1.1	311
Chronic obstructive asthma with status asthmaticus	8.3.1.2	312
Chronic obstructive asthma with acute exacerbation	8.3.1.3	313
Other and unspecified asthma	8.3.2	314
Other asthma without status asthmaticus or exacerbation	8.3.2.1	315
Other asthma with status asthmaticus	8.3.2.2	316
Other asthma with acute exacerbation	8.3.2.3	317
Aspiration pneumonitis; food/vomitus	8.4	318	129
Pleurisy; pneumothorax; pulmonary collapse	8.5	319	130
Pleurisy; pleural effusion	8.5.1	320
Pulmonary collapse; interstitial and compensatory emphysema	8.5.2	321
Empyema and pneumothorax	8.5.3	322
Respiratory failure; insufficiency; arrest (adult)	8.6	323	131
Respiratory failure	8.6.1	324
Other respiratory insufficiency	8.6.2	325
Lung disease due to external agents	8.7	326	132
Other lower respiratory disease	8.8	327	133
Postinflammatory pulmonary fibrosis	8.8.1	328
Painful respiration	8.8.2	329
Other and unspecified lower respiratory disease	8.8.3	330
Other upper respiratory disease	8.9	331	134
Diseases of the digestive system	9	332
Intestinal infection	9.1	333	135
Disorders of teeth and jaw	9.2	334	136
Diseases of mouth; excluding dental	9.3	335	137
Upper gastrointestinal disorders	9.4	336
Esophageal disorders	9.4.1	337	138
Esophagitis	9.4.1.1	338
Other esophageal disorders	9.4.1.2	339
Gastroduodenal ulcer (except hemorrhage)	9.4.2	340	139
Gastric ulcer	9.4.2.1	341
Duodenal ulcer	9.4.2.2	342
Peptic ulcer; site unspecified	9.4.2.3	343
Gastrojejunal ulcer	9.4.2.4	344
Gastritis and duodenitis	9.4.3	345	140
Acute gastritis	9.4.3.1	346
Other specified gastritis	9.4.3.2	347
Unspecified gastritis and gastroduodenitis	9.4.3.3	348
Duodenitis	9.4.3.4	349
Other disorders of stomach and duodenum	9.4.4	350	141
Abdominal hernia	9.5	351	143
Inguinal hernia	9.5.1	352
Inguinal hernia with obstruction or gangrene	9.5.1.1	353
Inguinal hernia without obstruction or gangrene	9.5.1.2	354
Diaphragmatic hernia	9.5.2	355
Other abdominal hernia	9.5.3	356
Femoral hernia with obstruction/gangrene	9.5.3.1	357
Femoral hernia without obstruction/gangrene	9.5.3.2	358
Umbilical hernia with obstruction/gangrene	9.5.3.3	359
Umbilical hernia without obstruction/gangrene	9.5.3.4	360
Ventral hernia with obstruction/gangrene	9.5.3.5	361
Ventral hernia without obstruction/gangrene	9.5.3.6	362
Incisional hernia with obstruction/gangrene	9.5.3.7	363
Incisional hernia without obstruction/gangrene	9.5.3.8	364
Other and unspecified hernia	9.5.3.9	365
Lower gastrointestinal disorders	9.6	366
Appendicitis and other appendiceal conditions	9.6.1	367	142
Acute appendicitis with abscess or peritonitis	9.6.1.1	368
Acute appendicitis without abscess or peritonitis	9.6.1.2	369
Acute appendicitis; not otherwise specified	9.6.1.3	370
Other appendiceal conditions	9.6.1.4	371
Regional enteritis and ulcerative colitis	9.6.2	372	144
Intestinal obstruction without hernia	9.6.3	373	145
Paralytic ileus	9.6.3.1	374
Impaction of intestine	9.6.3.2	375
Peritoneal or intestinal adhesions	9.6.3.3	376
Other intestinal obstruction	9.6.3.4	377
Diverticulosis and diverticulitis	9.6.4	378	146
Diverticulosis	9.6.4.1	379
Diverticulitis	9.6.4.2	380
Anal and rectal conditions	9.6.5	381	147
Peritonitis and intestinal abscess	9.6.6	382	148
Biliary tract disease	9.7	383	149
Cholelithiasis with acute cholecystitis	9.7.1	384
Cholelithiasis with other cholecystitis	9.7.2	385
Cholelithiasis without mention of cholecystitis	9.7.3	386
Calculus of bile duct	9.7.4	387
Cholecystitis without cholelithiasis	9.7.5	388
Other biliary tract disease	9.7.6	389
Liver disease	9.8	390
Liver disease; alcohol-related	9.8.1	391	150
Other liver diseases	9.8.2	392	151
Cirrhosis of liver without mention of alcohol	9.8.2.1	393
Liver abscess and sequelae of chronic liver disease	9.8.2.2	394
Ascites	9.8.2.3	395
Other and unspecified liver disorders	9.8.2.4	396
Pancreatic disorders (not diabetes)	9.9	397	152
Acute pancreatitis	9.9.1	398
Chronic pancreatitis	9.9.2	399
Other pancreatic disorders	9.9.3	400
Gastrointestinal hemorrhage	9.10.0	401	153
Hemorrhage from gastrointestinal ulcer	9.10.1	402
Melena	9.10.2	403
Gastroesophageal laceration syndrome	9.10.3	404
Other esophageal bleeding	9.10.4	405
Hemorrhage of rectum and anus	9.10.5	406
Hematemesis	9.10.6	407
Hemorrhage of gastrointestinal tract	9.10.7	408
Noninfectious gastroenteritis	9.11	409	154
Other gastrointestinal disorders	9.12	410	155
Constipation	9.12.1	411
Dysphagia	9.12.2	412
Other and unspecified gastrointestinal disorders	9.12.3	413
Diseases of the genitourinary system	10	414
Diseases of the urinary system	10.1	415
Nephritis; nephrosis; renal sclerosis	10.1.1	416	156
Acute and unspecified renal failure	10.1.2	417	157
Acute renal failure	10.1.2.1	418
Unspecified renal failure	10.1.2.2	419
Chronic renal failure	10.1.3	420	158
Urinary tract infections	10.1.4	421	159
Infections of kidney	10.1.4.1	422
Cystitis and urethritis	10.1.4.2	423
Urinary tract infection; site not specified	10.1.4.3	424
Calculus of urinary tract	10.1.5	425	160
Calculus of kidney	10.1.5.1	426
Calculus of ureter	10.1.5.2	427
Other and unspecified urinary calculus	10.1.5.3	428
Other diseases of kidney and ureters	10.1.6	429	161
Hydronephrosis	10.1.6.1	430
Other and unspecified diseases of kidney and ureters	10.1.6.2	431
Other diseases of bladder and urethra	10.1.7	432	162
Bladder neck obstruction	10.1.7.1	433
Other and unspecified diseases of bladder and urethra	10.1.7.2	434
Genitourinary symptoms and ill-defined conditions	10.1.8	435	163
Hematuria	10.1.8.1	436
Retention of urine	10.1.8.2	437
Other and unspecified genitourinary symptoms	10.1.8.3	438
Diseases of male genital organs	10.2	439
Hyperplasia of prostate	10.2.1	440	164
Inflammatory conditions of male genital organs	10.2.2	441	165
Other male genital disorders	10.2.3	442	166
Diseases of female genital organs	10.3	443
Nonmalignant breast conditions	10.3.1	444	167
Inflammatory diseases of female pelvic organs	10.3.2	445	168
Pelvic peritoneal adhesions	10.3.2.1	446
Cervicitis and endocervicitis	10.3.2.2	447
Pelvic inflammatory disease (PID)	10.3.2.3	448
Other inflammatory diseases of female pelvic organs	10.3.2.4	449
Endometriosis	10.3.3	450	169
Prolapse of female genital organs	10.3.4	451	170
Menstrual disorders	10.3.5	452	171
Ovarian cyst	10.3.6	453	172
Menopausal disorders	10.3.7	454	173
Female infertility	10.3.8	455	174
Other female genital disorders	10.3.9	456	175
Female genital pain and other symptoms	10.3.9.1	457
Other and unspecified female genital disorders	10.3.9.2	458
Complications of pregnancy; childbirth; and the puerperium	11	459
Contraceptive and procreative management	11.1	460	176
Sterilization	11.1.1	461
Other contraceptive and procreation management	11.1.2	462
Abortion-related disorders	11.2	463
Spontaneous abortion	11.2.1	464	177
Induced abortion	11.2.2	465	178
Postabortion complications	11.2.3	466	179
Complications mainly related to pregnancy	11.3	467
Ectopic pregnancy	11.3.1	468	180
Hemorrhage during pregnancy; abruptio placenta; placenta previa	11.3.2	469	182
Placenta previa	11.3.2.1	470
Abruptio placenta	11.3.2.2	471
Other hemorrhage during pregnancy; childbirth and the puerperium	11.3.2.3	472
Hypertension complicating pregnancy; childbirth and the puerperium	11.3.3	473	183
Preeclampsia and eclampsia	11.3.3.1	474
Other hypertension in pregnancy	11.3.3.2	475
Early or threatened labor	11.3.4	476	184
Threatened premature labor	11.3.4.1	477
Early onset of delivery	11.3.4.2	478
Other early or threatened labor	11.3.4.3	479
Prolonged pregnancy	11.3.5	480	185
or abnormal glucose tolerance complicating pregnancy; childbirth; or the puerperium	11.3.6	481	186
Other complications of pregnancy	11.3.7	482	181
Infections of genitourinary tract during pregnancy	11.3.7.1	483
Anemia during pregnancy	11.3.7.2	484
Mental disorders during pregnancy	11.3.7.3	485
Missed abortion	11.3.7.4	486
Hyperemesis gravidarum	11.3.7.5	487
Infectious and parasitic complications in mother affecting pregnancy	11.3.7.6	488
Other and unspecified complications of pregnancy	11.3.7.7	489
Indications for care in pregnancy; labor; and delivery	11.4	490
Malposition; malpresentation	11.4.1	491	187
Breech presentation	11.4.1.1	492
Other malposition; malpresentation	11.4.1.2	493
Fetopelvic disproportion; obstruction	11.4.2	494	188
Fetopelvic disproportion HCUP CCS 11/11/10 36	11.4.2.1	495
Other disproportion or obstruction	11.4.2.2	496
Previous cesarean section	11.4.3	497	189
Fetal distress and abnormal forces of labor	11.4.4	498	190
Fetal distress	11.4.4.1	499
Uterine inertia	11.4.4.2	500
Precipitate labor	11.4.4.3	501
Other abnormal forces of labor	11.4.4.4	502
Polyhydramnios and other problems of amniotic cavity	11.4.5	503	191
Premature rupture of membranes	11.4.5.1	504
Infection of amniotic cavity	11.4.5.2	505
Other problems of amniotic cavity	11.4.5.3	506
Complications during labor	11.5	507
Umbilical cord complication	11.5.1	508	192
Cord around neck with compression	11.5.1.1	509
Other and unspecified cord entanglement with or without compression	11.5.1.2	510
Other umbilical cord complications	11.5.1.3	511
Trauma to perineum and vulva	11.5.2	512	193
First degree perineal laceration	11.5.2.1	513
Second degree perineal laceration	11.5.2.2	514
Third degree perineal laceration	11.5.2.3	515
Fourth degree perineal laceration	11.5.2.4	516
Other perineal laceration and trauma	11.5.2.5	517
Forceps delivery	11.5.3	518	194
Other complications of birth; puerperium affecting management of mother	11.6	519	195
Postpartum hemorrhage	11.6.1	520
Complications of the puerperium	11.6.2	521
Cervical incompetence	11.6.3	522
Rhesus isoimmunization	11.6.4	523
Intrauterine death	11.6.5	524
Failed induction	11.6.6	525
Other obstetrical trauma	11.6.7	526
Other and unspecified complications of birth; puerperium affecting management of mother	11.6.8	527
Normal pregnancy and/or delivery	11.7	528	196
Normal delivery	11.7.1	529
Multiple gestation	11.7.2	530
Outcome of delivery (V codes)	11.7.3	531
Diseases of the skin and subcutaneous tissue	12	532
Skin and subcutaneous tissue infections	12.1	533	197
Cellulitis and abscess	12.1.1	534
Cellulitis and abscess of fingers and toes	12.1.1.1	535
Cellulitis and abscess of face	12.1.1.2	536
Cellulitis and abscess of arm	12.1.1.3	537
Cellulitis and abscess of hand	12.1.1.4	538
Cellulitis and abscess of leg	12.1.1.5	539
Cellulitis and abscess of foot	12.1.1.6	540
Other cellulitis and abscess	12.1.1.7	541
Other skin and subcutaneous infections	12.1.2	542
Other inflammatory condition of skin	12.2	543	198
Chronic ulcer of skin	12.3	544	199
Decubitus ulcer	12.3.1	545
Chronic ulcer of leg or foot	12.3.2	546
Other chronic skin ulcer	12.3.3	547
Other skin disorders	12.4	548	200
Diseases of the musculoskeletal system and connective tissue	13	549
Infective arthritis and osteomyelitis (except that caused by TB or STD)	13.1	550	201
Non-traumatic joint disorders	13.2	551
Rheumatoid arthritis and related disease	13.2.1	552	202
Osteoarthritis	13.2.2	553	203
Osteoarthritis; localized	13.2.2.1	554
Osteoarthritis; generalized and unspecified	13.2.2.2	555
Other non-traumatic joint disorders	13.2.3	556	204
Spondylosis; intervertebral disc disorders; other back problems	13.3	557	205
Spondylosis and allied disorders	13.3.1	558
Intervertebral disc disorders	13.3.2	559
Other back problems	13.3.3	560
Cervical radiculitis	13.3.3.1	561
Spinal stenosis; lumbar region	13.3.3.2	562
Lumbago	13.3.3.3	563
Sciatica	13.3.3.4	564
Thoracic or lumbosacral neuritis or radiculitis; unspecified	13.3.3.5	565
Backache; unspecified	13.3.3.6	566
Other back pain and disorders	13.3.3.7	567
Osteoporosis	13.4	568	206
Pathological fracture	13.5	569	207
Acquired deformities	13.6	570
Acquired foot deformities	13.6.1	571	208
Other acquired deformities	13.6.2	572	209
Systemic lupus erythematosus and connective tissue disorders	13.7	573	210
Other connective tissue disease	13.8	574	211
Other bone disease and musculoskeletal deformities	13.9	575	212
Congenital anomalies	14	576
Cardiac and circulatory congenital anomalies	14.1	577	213
Transposition of great vessels	14.1.1	578
Tetralogy of Fallot	14.1.2	579
Ventricular septal defect	14.1.3	580
Atrial septal defect	14.1.4	581
Endocardial cushion defects	14.1.5	582
Pulmonary valve atresia and stenosis	14.1.6	583
Aortic valve stenosis	14.1.7	584
Patent ductus arteriosus	14.1.8	585
Coarctation of aorta	14.1.9	586
Pulmonary artery anomalies	14.1.10	587
Cerebrovascular anomalies	14.1.11	588
Double outlet right ventricle	14.1.12	589
Common ventricle	14.1.13	590
Congenital insufficiency of aortic valve	14.1.14	591
Hypoplastic left heart syndrome	14.1.15	592
Gastrointestinal vessel congenital anomaly	14.1.16	593
Persistent fetal circulation	14.1.17	594
Other anomalies of bulbus cordis and cardiac septal closure	14.1.18	595
Other heart valve congenital anomalies	14.1.19	596
Other congenital anomalies of the heart	14.1.20	597
Other congenital anomalies of aorta	14.1.21	598
Other circulatory congenital anomalies	14.1.22	599
Digestive congenital anomalies	14.2	600	214
Esophageal atresia/tracheoesophageal fistula	14.2.1	601
Pyloric stenosis	14.2.2	602
Rectal and large intestine atresia/stenosis	14.2.3	603
Hirshsprungs disease	14.2.4	604
Meckels diverticulum	14.2.5	605
Atresia and stenosis of small intestine	14.2.6	606
Anomalies of intestinal fixation	14.2.7	607
Other upper gastrointestinal congenital anomalies	14.2.8	608
Other lower gastrointestinal congenital anomalies	14.2.9	609
Genitourinary congenital anomalies	14.3	610	215
Undescended testicle	14.3.1	611
Hypospadias and epispadias	14.3.2	612
Obstructive genitourinary defect	14.3.3	613
Polycystic kidney	14.3.4	614
Other cystic kidney disease	14.3.5	615
Embyronic cyst of fallopian tubes and broad ligaments	14.3.6	616
Other congenital anomalies of genitalia	14.3.7	617
Other congenital anomalies of urinary system	14.3.8	618
Nervous system congenital anomalies	14.4	619	216
Spina bifida	14.4.1	620
Congenital hydrocephalus	14.4.2	621
Other spinal cord congenital anomalies	14.4.3	622
Microcephalus	14.4.4	623
Other nervous system congenital anomalies	14.4.5	624
Other congenital anomalies	14.5	625	217
Cleft palate without cleft lip	14.5.1	626
Cleft lip with or without cleft palate	14.5.2	627
Congenital anomalies of the eye	14.5.3	628
Microtia (incomplete development of external ear)	14.5.4	629
Branchial cleft cyst or fistula	14.5.5	630
Other face and neck congenital anomalies	14.5.6	631
Congenital anomalies of larynx trachea and bronchus	14.5.7	632
Other respiratory congenital anomalies	14.5.8	633
Foot deformities	14.5.9	634
Congenital hip dislocation	14.5.10	635
Polydactyly (extra digits) and syndactyly (webbing between digits)	14.5.11	636
Congenital absence of lower limb	14.5.12	637
Congenital hip deformity	14.5.13	638
Other congenital anomalies of limbs	14.5.14	639
Congenital anomalies of skull and facial bones	14.5.15	640
Lumbosacral spondylolysis	14.5.16	641
Spondylolisthesis	14.5.17	642
Other spinal congenital anomalies	14.5.18	643
Osteogenesis imperfecta	14.5.19	644
Congenital anomalies of the diaphragm	14.5.20	645
Congenital anomalies of abdominal wall	14.5.21	646
Congenital pigmentary anomalies of skin	14.5.22	647
Other congenital anomalies of integument	14.5.23	648
Pectus excavatum	14.5.24	649
Downs Syndrome	14.5.25	650
All other congenital anomalies	14.5.26	651
Certain conditions originating in the perinatal period	15	652
Liveborn	15.1	653	218
Short gestation; low birth weight; and fetal growth retardation	15.2	654	219
Intrauterine hypoxia and birth asphyxia	15.3	655	220
Respiratory distress syndrome	15.4	656	221
Hemolytic jaundice and perinatal jaundice	15.5	657	222
Birth trauma	15.6	658	223
Other perinatal conditions	15.7	659	224
Respiratory conditions of fetus and newborn; other than respiratory distress	15.7.1	660
Infections specific to the perinatal period	15.7.2	661
Endocrine and metabolic disturbances of fetus and newborn	15.7.3	662
Other and unspecified perinatal conditions	15.7.4	663
Injury and poisoning	16	664
Joint disorders and dislocations; trauma-related	16.1	665	225
Fractures	16.2	666
Fracture of neck of femur (hip)	16.2.1	667	226
Skull and face fractures	16.2.2	668	228
Fracture of upper limb	16.2.3	669	229
Fracture of humerus	16.2.3.1	670
Fracture of radius and ulna	16.2.3.2	671
Other fracture of upper limb	16.2.3.3	672
Fracture of lower limb	16.2.4	673	230
Fracture of tibia and fibula	16.2.4.1	674
Fracture of ankle	16.2.4.2	675
Other fracture of lower limb	16.2.4.3	676
Other fractures	16.2.5	677	231
Fracture of vertebral column without mention of spinal cord injury	16.2.5.1	678
Fracture of ribs; closed	16.2.5.2	679
Fracture of pelvis	16.2.5.3	680
Other and unspecified fracture	16.2.5.4	681
Spinal cord injury	16.3	682	227
Intracranial injury	16.4	683	233
Concussion	16.4.1	684
Other intracranial injury	16.4.2	685
Crushing injury or internal injury	16.5	686	234
Open wounds	16.6	687
Open wounds of head; neck; and trunk	16.6.1	688	235
Open wounds of extremities	16.6.2	689	236
Sprains and strains	16.7	690	232
Superficial injury; contusion	16.8	691	239
Burns	16.9	692	240
Complications	16.10.0	693
Complication of device; implant or graft	16.10.1	694	237
Malfunction of device; implant; and graft	16.10.1.1	695
Infection and inflammation--internal prosthetic device; implant; and graft	16.10.1.2	696
Other complications of internal prosthetic device; implant; and graft	16.10.1.3	697
Complications of transplants and reattached limbs	16.10.1.4	698
Complications of surgical procedures or medical care	16.10.2	699	238
Cardiac complications	16.10.2.1	700
Respiratory complications	16.10.2.2	701
Gastrointestinal complications	16.10.2.3	702
Urinary complications	16.10.2.4	703
Hemorrhage or hematoma complicating a procedure	16.10.2.5	704
Postoperative infection	16.10.2.6	705
Other complications of surgical and medical procedures	16.10.2.7	706
Poisoning	16.11	707
Poisoning by psychotropic agents	16.11.1	708	241
Poisoning by other medications and drugs	16.11.2	709	242
Poisoning by nonmedicinal substances	16.11.3	710	243
Other injuries and conditions due to external causes	16.12	711	244
Symptoms; signs; and ill-defined conditions and factors influencing health status	17	712
Symptoms; signs; and ill-defined conditions	17.1	713
Syncope	17.1.1	714	245
Fever of unknown origin	17.1.2	715	246
Lymphadenitis	17.1.3	716	247
Gangrene	17.1.4	717	248
Shock	17.1.5	718	249
Nausea and vomiting	17.1.6	719	250
Abdominal pain	17.1.7	720	251
Malaise and fatigue	17.1.8	721	252
Allergic reactions	17.1.9	722	253
Factors influencing health care	17.2	723
Rehabilitation care; fitting of prostheses; and adjustment of devices	17.2.1	724	254
Administrative/social admission	17.2.2	725	255
Medical examination/evaluation	17.2.3	726	256
Other aftercare	17.2.4	727	257
Other screening for suspected conditions (not mental disorders or infectious disease)	17.2.5	728	258
Residual codes; unclassified; all E codes	18	729	259 and 260

## Sheet: 2011
NOM et PRENOMS	M	F	?	Age	REFERENCE	Profession	Domicile	Transport	D.E	H entrée	D.S	H sortie	DIAGNOSTIC D'ENTREE	DIAGNOSTIC DE SORTIE	CCS Category	CCS Code	CLASSIFICATION	VK Class	Evolution	Exeat	Transfert	Décharge	Evadé	Déces	CED	Evasan	MedianAgeM	MedianAgeF	MedianAge?
ALIMA Andrea Miora			1	6	AR	Ecolier	Majunga be	Voiture particulière	2011-01-02	1899-12-31 08:30:00	2011-01-02	1899-12-31 08:00:00	Plaie crânienne hémorragique par chute (AD)	Plaie punctiforme occipitale simple	Open wounds of head; neck; and trunk	16.6.1	Trauma crânien bénin	Trauma	Exeat	1									6
RANDRIANANTENAINA V. Landy		1		40	VRP (Méd libre)	Ménagère	Amborovy	Voiture particulière	2011-01-02	1899-12-31 17:00:00	2011-01-03	1899-12-31 07:00:00	Diarrhée aiguë	Syndrome dysentérique fébrile	intestinal infection	9.1	Infection digestive	Infectious Disease	Exeat	1								40
SOMARY Jona Gérard	1			28	VRP (Osiem)	?	Tsararivotra	Voiture particulière	2011-01-02	1899-12-31 20:20:00	2011-01-03	1899-12-31 06:45:00	Douleur abdo diffuse post-diarrhéique	Aérocolie	abdominal pain	17.1.7	Pathologie digestive	Gastrointestinal	Exeat	1							28
RAZAFINDRASOA Marie Rose		1		55	VRP(SMIM)	Ouvrière Paraky Sambatra	Mahavoky atsimo	Voiture particulière	2011-01-03	1899-12-31 08:45:00	2011-01-03	1899-12-31 16:00:00	Trauma crânien avec PCI /AT	Trauma crânien bénin	Intracranial injury	16.4	Trauma crânien bénin	Trauma	Exeat	1								55
FATIM Hassam		1		35	AR	Patrimoine de lEtat	Ambohimandamina	Voiture particulière	2011-01-03	1899-12-31 01:00:00	2011-01-03	1899-12-31 11:00:00	Perte de connaissance	Choc vagal post émotionnel	Syncope	17.1.1	Pathologie neuro-psy	Neurologic	Exeat	1								35
RAZAFINIAINA Ernest	1			23	VR (CSB Tanambao Sotema)	?	Tanambao Sotema	Voiture particulière	2011-01-03	1899-12-31 23:00:00	2011-01-04	1899-12-31 02:00:00	Plaie délabrée des lèvres /ARC	Plaies bénignes temporal D et labiales/ARC	Open wounds of head; neck; and trunk	16.6.1	Trauma crânio-facial bénin	Trauma	Exeat	1							23
RAZAFINDRASOA Cécile		1		80	AR	?	Morafeno	Voiture particulière	2011-01-03	1899-12-31 00:45:00	2011-01-05	1899-12-31 18:30:00	Crises convulsives + HTA connue	Infection bronchique+Poussée HTA+hypoglycémie	Pneumonia (except that caused by TB or STD)	8.1.1	Patho infect+cardi-vasc	Infectious Disease	Exeat	1								80
RAHARIMALALA Finarimihanta		1		41	VR (DRS)	Coiffeuse	Majunga be	Voiture particulière	2011-01-07	1899-12-31 19:45:00	2011-01-08	1899-12-31 12:30:00	Dyspnée	Spasmophilie	somatoform disorders	5.15.7	Pathologie neuro-psy	Neurologic	Exeat	1								41
RAKOTONANDRASANA Henintsoa			1	3	AR		Ambondrona	Voiture particulière	2011-01-08	1899-12-31 21:05:00	2011-01-08	1899-12-31 23:00:00	Trauma du 3e orteil du pied droit /AD	Fracture ouverte de P2 du 3e orteil du pied droit	Fracture of lower limb	16.2.4	Trauma membre inférieur	Trauma	Exeat	1									3
RANJAMINO Claudia Vanessa		1		20	AR	Coiffeuse	Mazava huile	Voiture particulière	2011-01-09	1899-12-31 19:40:00	2011-01-09	1899-12-31 09:00:00	Trauma crânien / ARC	Plaie sus orbitaire G/ARC	Open wounds of head; neck; and trunk	16.6.1	Trauma facial bénin	Trauma	Exeat	1								20
RAZAFIMANDIMBY Judickaël	1			28	AR	Agent de sécurité	Fiofio	Voiture particulière	2011-01-09	1899-12-31 01:05:00	2011-01-09	1899-12-31 04:00:00	Trauma/arme blanche (ARC)	Plaie faciale et avant-bras G/arme blanche	Open wounds of head; neck; and trunk	16.6.1	Multiples plaies	Trauma	Exeat	1							28
RAKOTOVAO Jean Marcellin	1			43	AR	Surveillant	Androva	Voiture particulière	2011-01-10	1899-12-31 08:20:00	2011-01-10	1899-12-31 10:00:00	Perte de connaissance	Hypoglycémie chez un alcoolique	Alcohol-related disorders	5.11	Pathologie métabolique	Endocrine	Exeat	1							43
RANDRIAMAMONJY Richard Johnny	1			34	AR	Masseur	Mahabibokely	Voiture particulière	2011-01-10	1899-12-31 14:00:00	2011-01-10	1899-12-31 15:50:00	Trauma/AC	Ecorchure de l'omoplate G	Superficial injury; contusion	16.8	Simple écorchure	Trauma	Exeat	1							34
RAKOTONIRINA	1			40	AR	Manœuvre	Tsararano	Voiture particulière	2011-01-10	1899-12-31 12:30:00	2011-01-10	1899-12-31 14:30:00	Trauma de la main D/ AD	Plaie de la face dorsale du pouce D /AD	Open wounds of extremities	16.6.2	Trauma membre supérieur	Trauma	Exeat	1							40
RANAIVOSON Alfred	1			44	VRP (Osiem)	?	Belobaka	Voiture particulière	2011-01-18	1899-12-31 01:15:00	2011-01-16	1899-12-31 11:45:00	Trauma/chute	Contusion thoracique	Superficial injury; contusion	16.8	Trauma thoracique bénin	Trauma	Exeat	1							44
SALEH Ayet		1		22	AR	Journalier	Sotema	Voiture particulière	2011-01-21	1899-12-31 00:45:00	2011-01-21	1899-12-31 08:00:00	TS/lexomil cp	TS/8cp de Lexomil	Poisoning by other medications and drugs	16.11.2	Toxicologie	Intoxication	Exeat	1								22
RODESSA Jean Paul	1			66	AR	Militaire retraité	Tsararano ambony	Voiture particulière	2011-01-22	1899-12-31 21:30:00	2011-01-22	1899-12-31 23:00:00	Plaie du cou /chute (AD)	Plaie linéaire de la partie latérale G/AD	Open wounds of extremities	16.6.2	Plaie simple	Trauma	Exeat	1							66
RAVOLOLONARITIANA Daniel	1			31	AR	Bijoutier	Tsararivotra Hasyma	Voiture particulière	2011-01-23	1899-12-31 15:03:00	2011-01-23	1899-12-31 18:05:00	Trauma /AC	Plaie bénigne du coude +écorchures des 2 genoux	Open wounds of extremities	16.6.2	Simples écorchures	Trauma	Exeat	1							31
RAZAFINDRALAMBO Harivola		1		45	AR	Employée Douane	Manjarisoa	Voiture particulière	2011-01-24	1899-12-31 14:50:00	2011-01-24	1899-12-31 21:00:00	Plaie délabrée de la main G/AC	Plaie délabrée du dos de la main D/AC	Open wounds of extremities	16.6.2	Trauma membre supérieur	Trauma	Exeat	1								45
RAVELOMANANJARA Pierre	1			42	AR	Pointeur Somapêche	Mahavoky atsimo	Voiture particulière	2011-01-28	1899-12-31 23:30:00	2011-01-29	1899-12-31 06:00:00	Trauma/AC	Plaie frontale linéaire	Open wounds of head; neck; and trunk	16.6.1	Trauma crânien bénin	Trauma	Exeat	1							42
RAKOTOZANANY Jimmy Adams			1	13	VR (CSB Mahavoky)	Ecolier	Mahavoky atsimo	Voiture particulière	2011-01-30	1899-12-31 18:35:00	2011-01-30	1899-12-31 19:00:00	Trauma de la jambe G/AC	Contusion simple de la jambe G/AC	Superficial injury; contusion	16.8	Trauma membre inférieur	Trauma	Exeat	1									13
RAMAROLAHY Alex	1			40	AR	Pêcheur	Ambondrona	Voiture particulière	2011-02-04	1899-12-31 01:20:00	2011-02-04	1899-12-31 06:00:00	Trauma /AC	Simple contusion	Superficial injury; contusion	16.8	Simple contusion	Trauma	Exeat	1							40
RAMAMONJISOA Tabaly Alain	1			32	AR	Collecteur	Andovinjo	Voiture particulière	2011-02-04	1899-12-31 01:50:00	2011-02-04	1899-12-31 03:30:00	Trauma /AC	Simple contusion	Superficial injury; contusion	16.8	Simple contusion	Trauma	Exeat	1							32
RASOANOMENJANAHARY Clotilde		1		52	AR	Major SceTraumato	Tanambao Sotema	Voiture particulière	2011-02-05	1899-12-31 08:30:00	2011-02-05	1899-12-31 10:10:00	Poussée hypertensive	Poussée hypertensive	Hypertension with complications and secondary hypertension	7.1.2	Pathologie cardio-vasculaire	Cardiovascular	Exeat	1								52
ROBERT Jean Marc	1			56	VRP (SMIM)	Cultivateur	Majunga be	Voiture particulière	2011-02-05	1899-12-31 23:10:00	2011-02-06	1899-12-31 02:30:00	Douleur atroce de la hanche	Douleur sciatique	Sciatica	13.3.3.4	Pathologie neuro-psy	Neurologic	Exeat	1							56
FIDY SOA Calvin	1			30	AR	Chauffeur	Amborovy	Voiture particulière	2011-02-06	1899-12-31 10:00:00	2011-02-07	1899-12-31 07:00:00	Douleur abdominale +vomissement	Intoxication alimentaire	intestinal infection	9.1	Toxicologie	Intoxication	Exeat	1							30
SAMBYTANANA	1			23	AR	?	Tsaramandroso ambany	Voiture particulière	2011-02-06	1899-12-31 19:00:00	2011-02-07	1899-12-31 08:00:00	Trauma/AC	Plaies multiples +état d'ivresse	Open wounds	16.6	Plaies multiples	Trauma	Exeat	1							23
RAMAROLAHY Be Clément	1			23	AR	Séminariste	Ambohimandamina	Voiture particulière	2011-02-10	1899-12-31 21:25:00	2011-02-10	1899-12-31 23:00:00	Douleur du flanc gauche	Colique néphrétique gauche	Calculus of urinary tract	10.1.5	Pathologie urologique	Urologic	Exeat	1							23
PAVILLARD	1			28	AR	Policier	Tsaramandroso ambany	Voiture particulière	2011-02-11	1899-12-31 21:02:00	2011-02-02	1899-12-31 01:00:00	Trauma / ARC	Contusion de la face	Superficial injury; contusion	16.8	Simple contusion	Trauma	Exeat	1							28
ANDRIAMALALANANAHARY Fanomezantsoa	1			33	VRP (Méd libre)	Médecin	Tsaramandroso	Voiture particulière	2011-02-11	1899-12-31 09:35:00	2011-02-13	1899-12-31 09:00:00	Crise d'asthme	Crise d'asthme + syndrome grippal	Asthma	8.3	Pathologie respiratoire	Pulmonary	Exeat	1							33
RAKOTOMALALA Veronirina		1		40	AR	Directrice boutique CLEA	Androva	Voiture particulière	2011-02-12	1899-12-31 12:50:00	2011-02-12	1899-12-31 13:50:00	Trauma facial / ARC	Plaie linéaire de l'aile du nez droit	Open wounds of head; neck; and trunk	16.6.1	Trauma facial	Trauma	Exeat	1								40
RASOANOMENJANAHARY Adeline		1		17	AR	Collégienne	Mahavoky avaratra	Voiture particulière	2011-02-15	1899-12-31 14:40:00	2011-02-15	1899-12-31 17:10:00	Trauma du coude droit / chute	Trauma bénin du coude droit / chute	injury and poisoning	16	Trauma membre supérieur	Trauma	Exeat	1								17
NAMETRAHA Julienne		1		19	VR (FSFA)	Ménagère	Androva	Voiture particulière	2011-02-16	1899-12-31 15:20:00	2011-02-16	1899-12-31 18:20:00	Trauma de hanche/écroulement d'un mur chez une femme enceinte de 7 mois	Trauma dorso-lombaire bénin chez une femme enceinte	injury and poisoning	16	Trauma dorsal	Trauma	Exeat	1								19
VINCENT Fosiny	1			64	VR (CSB Amborovy)	Cultivateur	Ankazomenavony	Voiture particulière	2011-02-17	1899-12-31 23:15:00	2011-02-17	1899-12-31 23:55:00	Tentative de suicide	TS/raticide	poisoning by nonmedicinal substances	16.11.3	Toxicologie	Intoxication	Exeat	1							64
HATIM Mohamed			1	7	AR	Ecolier	Patel Mahabibokely	Voiture particulière	2011-02-22	1899-12-31 09:30:00	2011-02-22	1899-12-31 11:00:00	Trauma/chute d'une bicyclette	Simple écorchure du visage	Superficial injury; contusion	16.8	Simple écorchure	Trauma	Exeat	1									7
RAMBELOSON Veromanitra		1		68	VRP (Méd libre)	Ménagère	?	Voiture particulière	2011-02-24	1899-12-31 10:00:00	2011-02-24	1904-12-19	BPCO	BPCO	Chronic obstructive pulmonary disease and bronchiectasis	8.2	Pathologie respiratoire	Pulmonary	Exeat	1								68
RAHARIMALALA Julie Nirina		1		37	AR	Secrétaire	Tsaramandroso	Voiture particulière	2011-02-25	1899-12-31 19:00:00	2011-02-26	1899-12-31 08:40:00	Perte de connaissance	Spasmophilie	somatoform disorders	5.15.7	Pathologie neuro-psy	Neurologic	Exeat	1								37
AZAD Randrianandraina Parfait	1			49	AR	Policier	?	Voiture particulière	2011-02-26	1899-12-31 21:50:00	2011-02-26	1899-12-31	Trauma/AC (moto)	Plaie profonde du genou droit et pied droit	Open wounds of extremities	16.6.2	Trauma membre inférieur	Trauma	Exeat	1							49
MAHASOLO VELO Charner	1			48	VRP (Infirmerie Garnison)	Militaire	Camp militaire	Voiture particulière	2011-02-26	1899-12-31 23:30:00	2011-02-27	1899-12-31 08:00:00	Douleur testiculaire avec suspicion d'ascension testiculaire	Douleur testiculaire après effort physique	Diseases of male genital organs	10.2	Pathologie génito-urinaire	Genitourinary	Exeat	1							48
BASSET Yves	1			71	AR	Retraité	Tsaramandroso	Voiture particulière	2011-02-26	1899-12-31 23:00:00	2011-03-05	1899-12-31 10:00:00	AEG chez un cancéreux	Carcinome bronchique à petitescellules + mértastase	Cancer of bronchus; lung	2.3	Oncologie	Oncologic	Exeat	1							71
IAVILAZA Richard Armand	1			34	AR	Technicien	Ambondrona	Voiture particulière	2011-02-27	1899-12-31 07:45:00	2011-02-27	1899-12-31 19:30:00	Trauma multiple / AC (Moto)	Multiples écorchures/AC	Superficial injury; contusion	16.8	Multiples écorchures	Trauma	Exeat	1							34
RAHANITRARINIVO Josette		1		56	AR	Fonctionnaire	Majunga be	Voiture particulière	2011-02-28	1899-12-31 17:15:00	2011-02-28	1899-12-31 18:10:00	Trauma/AC	Contusion de lahanche /AC	Superficial injury; contusion	16.8	Simple contusion	Trauma	Exeat	1								56
RAKOTONDRAHASY Dany	1			21	AR	Etudiant	Manjarisoa	Voiture particulière	2011-03-01	1899-12-31 15:00:00	2011-03-01	1899-12-31 17:00:00	Trauma de l'avant-bras/AC	Contusion de l'avant-bras G/AC	Superficial injury; contusion	16.8	Simple contusion	Trauma	Exeat	1							21
ANDRIAMANALINA Sylvain	1			24	AR	Marin	Ambondrona	Voiture particulière	2011-03-05	1899-12-31 18:25:00	2011-03-05	1899-12-31 21:15:00	Trauma thoracique /AC	Contusion thoracique	Superficial injury; contusion	16.8	Trauma thoracique bénin	Trauma	Exeat	1							24
BRYAN Grey Burrows	1			20	AR	Missionnaire	Plateaux des tombes	Voiture particulière	2011-03-05	1899-12-31 12:25:00	2011-03-05	1899-12-31 15:00:00	Trauma crânien/AC	Plaie occipitale /AC	Open wounds of head; neck; and trunk	16.6.1	Trauma crânien bénin	Trauma	Exeat	1							20
BERNARDINO	1			20	AR	Receveur	Ambalavola	Voiture particulière	2011-03-12	1899-12-31 17:12:00	2011-03-12	1899-12-31 18:00:00	Trauma de la jambe /AC	Contusion de la jambe G/AC	Superficial injury; contusion	16.8	Simple contusion	Trauma	Exeat	1							20
FANAMPISOA	1			23	AR	Tireur de pousse-pousse	Tsaramandroso ambany	Voiture particulière	2011-03-13	1899-12-31 22:30:00	2011-03-13	1899-12-31 23:20:00	Traumatisme /Ac	Simple contusion de la jambe droite /AC	Superficial injury; contusion	16.8	Simple contusion	Trauma	Exeat	1							23
FAMANTANANTSOA	1			20	AR	Gardien	Betamanga	Voiture particulière	2011-03-15	1899-12-31 02:30:00	2011-03-15	1899-12-31 09:00:00	Plaie basi-thoracique droite / AD	Plaie basi-thoracique droite / AD	Open wounds of head; neck; and trunk	16.6.1	Trauma thoracique bénin	Trauma	Exeat	1							20
ANIL			1	12	AR	Ecolier	Sotema	Voiture particulière	2011-03-19	1899-12-31 22:15:00	2011-03-19	1899-12-31 23:05:00	Traumatisme unguéal	Traumatisme unguéal du pouce gauche	injury and poisoning	16	Trauma membre supérieur	Trauma	Exeat	1									12
MARONIRINA Marius	1			23	AR	Etudiant	Abattoir	Voiture particulière	2011-03-19	1899-12-31 11:15:00	2011-03-19	1899-12-31 12:45:00	Trauma/ARC	Plaie occipitale	Open wounds of head; neck; and trunk	16.6.1	Trauma crânien bénin	Trauma	Exeat	1							23
RAMAHATAFANDRY Clarck	1			63	AR	?	Mangarivotra	Voiture particulière	2011-03-20	1899-12-31 16:30:00	2011-03-22	1899-12-31 12:30:00	Trauma crânien / chutedu lit	AVC + trauma crânien bénin par chute	Acute cerebrovascular disease	7.3.1	Pathologie cardio-vasculaire	Cardiovascular	Exeat	1							63
RANDRIATSARAFARA Jean Claude	1			23	AR	Ouvrier JIRAMA	Tsaramandroso	Voiture particulière	2011-03-25	1899-12-31 09:25:00	2011-03-26	1899-12-31 12:30:00	Prurit généralisé	PRG (Ptyriasis rosé de Gilbert)	Other inflammatory condition of skin	12.2	Dermatologie	Dermatologic	Exeat	1							23
SITRAKA		1		25	VRP (Méd libre)	Etudiant	Antananarivo	Voiture particulière	2011-03-28	1899-12-31 15:55:00	2011-03-29	1899-12-31 08:10:00	Perte de connaissance	Coma post-critique	Coma; stupor; and brain damage	6.6	Pathologie neuro-psy	Neurologic	Exeat	1								25
RAZAFINTSALAMA	1			31	AR	Chômeur	Morafeno	Voiture particulière	2011-03-31	1899-12-31 03:00:00	2011-03-31	1899-12-31 07:15:00	Douleur aiguë FID	Aérocolie	abdominal pain	17.1.7	FID	Gastrointestinal	Exeat	1							31
MAHATOKY Jean	1			47	AR	Agent de liaison	Tsararano Nosikely	Voiture particulière	2011-04-02	1899-12-31 16:00:00	2011-04-02	1899-12-31 18:50:00	Lipothymie au cours d'un marathon	Hypoglycémie	Endocrine; nutritional; and metabolic diseases and immunity disorders	3	Pathologie métabolique	Endocrine	Exeat	1							47
RAHOLISON Hajanirina	1			30	AR	Gendarme	Antananarivo	Voiture particulière	2011-04-02	1899-12-31 16:00:00	2011-04-03	1899-12-31 10:20:00	Perte de connaissance	Intoxication alimentaire	intestinal infection	9.1	Pathologie digestive	Gastrointestinal	Exeat	1							30
RASOANAIVO Manitra			1	5.5	AR	Ecolier	Tsaramandroso	Voiture particulière	2011-04-06	1899-12-31 16:10:00	2011-04-06	1899-12-31 18:30:00	Trauma du coude droit/chute	Phlegmon du bras et avant-bras droit post-traumatique	Other inflammatory condition of skin	12.2	Trauma membre supérieur	Trauma	Exeat	1									5.5
MIARIVOLA Andry Notahiana		1		24	AR	Etudiant	La piscine hotel	Voiture particulière	2011-04-06	1899-12-31 00:15:00	2011-04-06	1899-12-31 09:00:00	Céphalées + frissons	Bronchite aiguë	Acute bronchitis	8.1.4	Pathologie infectieuse	Infectious Disease	Exeat	1								24
NAMBININDRAZANA Nirina Saïd	1			32	VRP (SOS Médecin)	Garde du corps	Pont blanc	Voiture particulière	2011-04-10	1899-12-31 18:20:00	2011-04-10	1899-12-31 20:00:00	Trauma /AC	Contusion claviculaire D et plaie mentonnière	Superficial injury; contusion	16.8	Multiples plaies	Trauma	Exeat	1							32
RASOARIMALALA Henriette		1		21	AR	Commerçant	Antanimasaja	Voiture particulière	2011-04-11	1899-12-31 15:43:00	2011-04-11	1899-12-31 17:00:00	Trauma du genou /AC	Contusion des 2 genoux/AC	Superficial injury; contusion	16.8	Trauma membre inférieur	Trauma	Exeat	1								21
FITIA Sariakamalala			1	10	AR	Ecolier	Tanambao Sotema	Voiture particulière	2011-04-13	1899-12-31 09:00:00	2011-04-13	1899-12-31 10:30:00	Trauma/effondrement d'un mur d'école	Contusion dorsale	Superficial injury; contusion	16.8	Simple contusion	Trauma	Exeat	1									10
RANAIVOSON Charles	1			51	VRP (Jirama)	Magasinier JIRAMA	La Corniche	Voiture particulière	2011-04-15	1899-12-31 15:50:00	2011-04-15	1899-12-31 18:00:00	Trauma de l'orteil du pied gauche /AC	Fracture ouverte comminutive de l'orteil du pied G/AC	Fracture of lower limb	16.2.4	Trauma membre inférieur	Trauma	Exeat	1							51
AURELIE		1		21	AR	Ménagère	Antananarivo	Voiture particulière	2011-04-19	1899-12-31 21:45:00	2011-04-20	1899-12-31 01:05:00	Perte de connaissance	Dystonie neuro-végétative	Somatoform disorders	5.15.7	Pathologie neuro-psy	Neurologic	Exeat	1								21
RAKOTOVAO Andrianaivo Bernard			1	11	AR	Ecolier	Anjiajia	Voiture particulière	2011-04-21	1899-12-31 22:00:00	2011-04-21	1899-12-31 22:30:00	Trauma crânien /AC	Multiples écorchures faciale et abdominale/AC	Superficial injury; contusion	16.8	Multiples écorchures	Trauma	Exeat	1									11
PATRICK	1			39	AR	Transporteur	Terrain mena	Voiture particulière	2011-04-22	1899-12-31 21:15:00	2011-04-22	1899-12-31 13:00:00	Trauma crânien/AC	Plaie linéaire pariétale gauche	Open wounds of head; neck; and trunk	16.6.1	Trauma crânien bénin	Trauma	Exeat	1							39
RAMANJATOSON Maurice	1			69	AR	Gendarme retraité	Antanimasaja	Voiture particulière	2011-04-23	1899-12-31 03:45:00	2011-04-23	1899-12-31 06:45:00	Hypoglycémie majeure chez un DNID sous Daonil depuis 3 mois	Hypoglycémie	Endocrine; nutritional; and metabolic diseases and immunity disorders	3	Pathologie métabolique	Endocrine	Exeat	1							69
JEREMIE Jean	1			25	AR	Mécanicien	Tsararano ambany	Voiture particulière	2011-04-23	1899-12-31 00:30:00	2011-04-23	1899-12-31 07:30:00	Trauma cervical	Trauma cervical bénin	injury and poisoning	16	Trauma cervical bénin	Trauma	Exeat	1							25
HERINIAINA Alexis	1			23	AR	Gardien	Amborovy	Voiture particulière	2011-04-23	1899-12-31 19:05:00	2011-04-23	1899-12-31 20:00:00	Trauma crânien/AC	Trauma crânien bénin +contusion thoracique	Intracranial injury	16.4	Trauma crânien bénin	Trauma	Exeat	1							23
RAZAFIMAMONAHY Francia Rollande			1	3	VRP (SOS Médecin)	?	Manjarisoa	Voiture particulière	2011-04-24	1899-12-31 23:00:00	2011-04-24	1899-12-31 23:30:00	Trauma crânien/AC	Trauma crânien bénin/AC	Intracranial injury	16.4	Trauma crânien bénin	Trauma	Exeat	1									3
MINA		1		32	VRP (Méd libre)	Ménagère	Fiofio	Voiture particulière	2011-04-24	1899-12-31 16:00:00	2011-04-24	1899-12-31 18:05:00	Perte de connaissance	Crise émotionnelle aiguë (DNV)	Somatoform disorders	5.15.7	Pathologie neuro-psy	Neurologic	Exeat	1								32
BORA	1			28	AR	?	Pont blanc	Voiture particulière	2011-04-25	1899-12-31 16:12:00	2011-04-25	1899-12-31 16:30:00	Intoxication médicamenteuse (médicament méconnu)	Suspicion de coma éthylique	Alcohol-related disorders	5.11	Toxicologie	Intoxication	Exeat	1							28
VORIMARO Armel	1			32	AR	Boucher	Sotema	Voiture particulière	2011-04-25	1899-12-31 17:00:00	2011-04-25	1899-12-31 18:00:00	Trauma crânien /ARC	Trauma crânien bénin/ARC	Intracranial injury	16.4	Trauma crânien bénin	Trauma	Exeat	1							32
RAVONINOMENJANAHARY Sahondra		1		25	AR	Ménagère	Mahavoky atsimo	Voiture particulière	2011-04-25	1899-12-31 13:45:00	2011-04-25	1899-12-31 15:00:00	Trauma MIG/AC	Plaie du genou gauche	Open wounds of extremities	16.6.2	Trauma membre inférieur	Trauma	Exeat	1								25
AICHA		1		29	AR	?	Morafeno	Voiture particulière	2011-04-25	1899-12-31 07:30:00	2011-04-25	1899-12-31 08:45:00	Vertiges + perte de connaissance brève	Dystonie neuro-végétative	Somatoform disorders	5.15.7	Pathologie neuro-psy	Neurologic	Exeat	1								29
RABEMANANTSOA Francine		1		27	VRP (SMIM)	Etudiant	La Corniche	Voiture particulière	2011-04-25	1899-12-31 23:55:00	2011-04-26	1899-12-31 02:00:00	Spasmophilie	Dystonie neuro-végétative	Somatoform disorders	5.15.7	Pathologie neuro-psy	Neurologic	Exeat	1								27
RAZAFINDRAKOTO	1			66	AR	Maçon	Antananarivo	Voiture particulière	2011-04-26	1899-12-31 07:10:00	2011-04-26	1899-12-31 09:00:00	Intoxication alimentaire	Intoxication alimentaire	intestinal infection	9.1	Pathologie digestive	Gastrointestinal	Exeat	1							66
RASOAMALALA Georgette		1		33	AR	Ménagère	Antananarivo	Voiture particulière	2011-04-26	1899-12-31 07:10:00	2011-04-26	1899-12-31 09:00:00	Intoxication alimentaire	Intoxication alimentaire	intestinal infection	9.1	Pathologie digestive	Gastrointestinal	Exeat	1								33
TONGAZARA Bruno	1			40	AR	Marin	Tanambao Ambalavato	Voiture particulière	2011-04-26	1899-12-31 00:15:00	2011-04-26	1899-12-31 01:30:00	Trauma crânien /ARC	Trauma crânien bénin/ARC	Intracranial injury	16.4	Trauma crânien bénin	Trauma	Exeat	1							40
RAMATRADRAIBE Joseph	1			25	AR	Chauffeur	Ambohimandamina	Voiture particulière	2011-04-27	1899-12-31 11:15:00	2011-04-27	1899-12-31 19:30:00	Perte de connaissance	IMV pluri-médicamenteuse (Ibex,Nivaquine, Ciprofloxacine)	Poisoning by other medications and drugs	16.11.2	Toxicologie	Intoxication	Exeat	1							25
RANDRIANAIVO	1			18	VR (CSB Mahabibo)	Ecolier	Ambalavola	Voiture particulière	2011-04-29	1899-12-31 12:50:00	2011-04-29	1899-12-31 15:00:00	Epanchement articulaire de la cheville droite/AC	Entorse de la cheville droite/AC	Sprains and strains	16.7	Trauma membre inférieur	Trauma	Exeat	1							18
ACHIM Robson			1	14	AR	Ecolier	Sotema	Voiture particulière	2011-04-29	1899-12-31 12:48:00	2011-04-29	1899-12-31 18:00:00	Trauma crânien/AC	Ecorchures multiples	Superficial injury; contusion	16.8	Ecorchures multiples	Trauma	Exeat	1									14
MAHASOA Florent	1			41	AR	?	Mahabibokely	Voiture particulière	2011-04-29	1899-12-31 01:15:00	2011-04-29	1899-12-31 04:45:00	Trauma / ARC	Plaie superficielle du thorax /Arc	Open wounds of head; neck; and trunk	16.6.1	Trauma thoracique	Trauma	Exeat	1							41
RANAIVOSON Faly	1			26	AR	?	Ambalavola	Voiture particulière	2011-05-03	1899-12-31 14:35:00	2011-05-03	1899-12-31 15:45:00	Trauma/AC	Multiples écorchures/AC	Superficial injury; contusion	16.8	Multiples écorchures	Trauma	Exeat	1							26
RANDRIANARIMANANTSOA	1			43	AR	Soudeur	Ambohimandamina	Voiture particulière	2011-05-03	1899-12-31 17:40:00	2011-05-03	1899-12-31 18:40:00	Brûlure électrique /AT	Brûlure électrique 1er degré du 2e doigt de la main droite	Burns	16.9	Brûlure	Trauma	Exeat	1							43
RAKOTONANDRASANA Naina Arson Fifèle	1			36	AR	Docker	Belobaka	Voiture particulière	2011-05-06	1899-12-31 12:35:00	2011-05-06	1899-12-31 17:30:00	Trauma /AT	Amputation/AT de P2 du 2e doigt de la main droite	injury and poisoning	16	Trauma membre supérieur	Trauma	Exeat	1							36
RAVELOMANANTSOA	1			28	AR	Chauffeur	Amborovy	Voiture particulière	2011-05-08	1899-12-31 21:20:00	2011-05-08	1899-12-31 22:40:00	Traumatisme du nez/éclats de vitre	Egratignure de la facedroite dunez	Superficial injury; contusion	16.8	Trauma facial	Trauma	Exeat	1							28
RAMILIARIJAONA Nandrasana	1			17	AR	Mécanicien	Antanimalandy	Voiture particulière	2011-05-10	1899-12-31 18:30:00	2011-05-10	1899-12-31 21:55:00	TS /ciprofloxacine+multivitamine	IMV/ciprofloxacine+multivitamine	Poisoning by other medications and drugs	16.11.2	Toxicologie	Intoxication	Exeat	1							17
RAFALIMANANA Jean Claude Aimé	1			42	AR	Maçon	Ambohimandamina	Voiture particulière	2011-05-11	1899-12-31 10:10:00	2011-05-11	1899-12-31 12:00:00	Plaie du genou droit/AT	Plaie du genou droit/AT	Open wounds of extremities	16.6.2	Trauma membre inférieur	Trauma	Exeat	1							42
NORDINE			1	6	AR	Ecolier	Mangarivotra	Voiture particulière	2011-05-11	1899-12-31 17:40:00	2011-05-12	1899-12-31 09:00:00	Trauma crânien/AC	Plaie temporo-pariétale/AC	Open wounds of head; neck; and trunk	16.6.1	Trauma crânien bénin	Trauma	Exeat	1									6
MALANA Fulgence	1			27	AR	Chômeur	Aranta	Voiture particulière	2011-05-12	1899-12-31 05:15:00	2011-05-12	1899-12-31 06:50:00	Trauma crânien/ARC	Plaies multiples	Open wounds	16.6	Plaies multiples	Trauma	Exeat	1							27
RAKOTOMALALA Jean Nirina	1			23	AR	Charpentier	Tsararano ambony	Voiture particulière	2011-05-13	1899-12-31 18:55:00	2011-05-13	1899-12-31 21:55:00	Douleur aiguë de la fosse lombaire droite	Douleur lombaire post-traumatique	Other back pain and disorders	13.3.3.7	Trauma dorso-lombaire	Trauma	Exeat	1							23
MITENE	1			42	AR	Exploitant agricole	Amborovy	Voiture particulière	2011-05-17	1899-12-31 18:30:00	2011-05-17	1899-12-31 20:30:00	Trauma crânien /ARC	Plaie pariétale gauche /ARC	Open wounds of head; neck; and trunk	16.6.1	Trauma crânien bénin	Trauma	Exeat	1							42
RAJERISON Chrysostome	1			42	VRP (SMIM)	Marin	Androva	Voiture particulière	2011-05-18	1899-12-31 19:45:00	2011-05-18	1899-12-31 23:30:00	Diarrhées + asthénie après prise de poisson	ICAM	Poisoning	16.11	Toxicologie	Intoxication	Exeat	1							42
RAZAFIARISOA Tolijara		1		17	AR	Ecolier	Majunga be	Voiture particulière	2011-05-19	1899-12-31 19:30:00	2011-05-19	1899-12-31 20:30:00	Plaie traumatique /AD	Plaie délabrée du 1/3-moyen de la jambe droite/AD	Open wounds of extremities	16.6.2	Trauma membre inférieur	Trauma	Exeat	1								17
RABEVAHOAKA Bruno	1			44	AR	Agent JIRAMA	Majunga be	Voiture particulière	2011-05-21	1899-12-31 22:40:00	2011-05-21	1899-12-31 23:20:00	Plaie hémorragique /AT	Plaie de la face postérieure dez l'avant-bras G/AT	Open wounds of extremities	16.6.2	Trauma membre supérieur	Trauma	Exeat	1							44
RABARIHASINJARA Alex	1			23	AR	Etudiant	Bois sacré	Voiture particulière	2011-05-23	1899-12-31 09:05:00	2011-05-23	1899-12-31 10:30:00	Douleur FIG	Hypocalcémie	Fluid and electrolyte disorders	3.8	Pathologie métabolique	Endocrine	Exeat	1							23
FANOMEZANTSOA Mamitiana Noël	1			25	AR	Charpentier	Antsirabe	Voiture particulière	2011-05-23	1899-12-31 15:30:00	2011-05-23	1899-12-31 20:05:00	Trauma thoracique/chute (AT)	Multiples écorchures/AT	Superficial injury; contusion	16.8	Multiples écorchures	Trauma	Exeat	1							25
FUNCHIKANG Yvonne			1	5	AR	Ecolier	Aranta	Voiture particulière	2011-05-24	1899-12-31 11:55:00	2011-05-24	1899-12-31 12:30:00	Trauma /AC	Simples écorchures	Superficial injury; contusion	16.8	Multiples écorchures	Trauma	Exeat	1									5
LAINGO Lalaina	1			35	VRP (Méd libre)	Agent de sécurité	Andranofasika	Voiture particulière	2011-05-25	1899-12-31 22:00:00	2011-05-26	1899-12-31 20:45:00	Crise spastique de la mâchoire inférieure	Syndrome extra-pyramidal (/métoclopramide)+ gastro-entérite	Poisoning by psychotropic agents	16.11.1	Effets secondaires médicamenteuses	Intoxication	Exeat	1							35
DIADRODINE Babou	1			50	AR	Boucher	Betsako	Voiture particulière	2011-05-26	1899-12-31 23:00:00	2011-05-27	1899-12-31 01:20:00	Trauma crânien / arme blanche	Plaie du cuir chevelu	Open wounds of head; neck; and trunk	16.6.1	Trauma crânien bénin	Trauma	Exeat	1							50
RAVOSOA Marine Roxana		1		27	AR	Ménagère	La Corniche	Voiture particulière	2011-05-27	1899-12-31 22:00:00	2011-05-27	1899-12-31 23:45:00	Traumatisme du cou/AC	Simple contusion du cou/AC	Superficial injury; contusion	16.8	Simple contusion	Trauma	Exeat	1								27
TOMBOZAFY Fidèle	1			66	AR	Religieux	Evéché	Voiture particulière	2011-05-29	1899-12-31 22:58:00	2011-05-29	1899-12-31 23:45:00	Trauma/AC	Contusion de la cuisse gauche/Ac	Superficial injury; contusion	16.8	Simple contusion	Trauma	Exeat	1							66
RAZANANOA Stasie Cathaline			1	10	AR	Ecolier	Terrain mena	Voiture particulière	2011-05-30	1899-12-31 12:30:00	2011-05-30	1899-12-31 13:15:00	Traumatisme sus-orbitaire/AC	Simple ecchymose péri-orbitaire/AC	Superficial injury; contusion	16.8	Simple contusion	Trauma	Exeat	1									10
RAKOTONIRINA	1			54	AR	?	Antanimalandy	Voiture particulière	2011-06-01	1899-12-31 08:45:00	2011-06-01	1899-12-31 10:30:00	Trauma/AC	Contusion de l'épaule gauche/Ac	Superficial injury; contusion	16.8	Simple contusion	Trauma	Exeat	1							54
RAKOTONDRAMANANA	1			30	AR	Cultivateur	Antsahavaky	Voiture particulière	2011-06-05	1899-12-31 15:15:00	2011-06-05	1899-12-31 16:30:00	Traumatisme de la face/AD	Plaie palpébrale gauche /AD	Open wounds of head; neck; and trunk	16.6.1	Trauma facal	Trauma	Exeat	1							30
RANDRIANANTENAINA Lanto	1			43	AR	Médecin vétérinaire	Boulevard Marcoz	Voiture particulière	2011-06-05	1899-12-31 23:30:00	2011-06-05	1899-12-31 23:56:00	Blessure du 3e doigt de la main droite/ARC	Plaie bénigne du 3e doigt de la main droite/ARC	Open wounds of extremities	16.6.2	Trauma membre supérieur	Trauma	Exeat	1							43
AUBOURG Patrick	1			53	AR	Retraité	Majunga be	Voiture particulière	2011-06-06	1899-12-31 10:30:00	2011-06-06	1899-12-31 11:00:00	Piqûre par épine de camaron	Corps étranger du 2e doigt	injury and poisoning	16	Trauma membre supérieur	Trauma	Exeat	1							53
JOSIANE		1		45	AR	Vendeur	Tsararano	Voiture particulière	2011-06-10	1899-12-31 22:30:00	2011-06-11	1899-12-31 08:30:00	Douleur abdominale diffuse	Colopathie fonctionnelle	Lower gastrointestinal disorders	9.6	Pathologie digestive	Gastrointestinal	Exeat	1								45
RAZAFINDRATSITO Marie Louise		1		69	VRP (Espace médical)	Ménagère	Amborovy	Voiture particulière	2011-06-12	1899-12-31 22:15:00	2011-06-14	1899-12-31 08:30:00	Dyspnée chez unemalade sous traitement anti-tuberculeux	Crise d'asthme aigu	Asthma	8.3	Pathologie respiratoire	Pulmonary	Exeat	1								69
JOHNNY			1	6	AR	Ecolier	Tanambao Sotema	Voiture particulière	2011-06-14	1899-12-31 19:00:00	2011-06-14	1899-12-31 20:00:00	Trauma/AC	Multiples écorchures/AC	Superficial injury; contusion	16.8	Multiples écorchures	Trauma	Exeat	1									6
RABENJA Heriniaina	1			20	AR	Etudiant	Tanambao Ambalavato	Voiture particulière	2011-06-15	1899-12-31 08:00:00	2011-06-15	1899-12-31 09:40:00	Trauma/AC	Ecorchures du genou gauche et de la paume de la main gauche	Superficial injury; contusion	16.8	Simples écorchures	Trauma	Exeat	1							20
RAHARINIAINA Voahanginirina		1		41	VR (CSB Mahabibo)	DAF université M/ga	Mangarivotra	Voiture particulière	2011-06-15	1899-12-31 10:30:00	2011-06-15	1899-12-31 15:00:00	Douleur thoracique avec sensation de gêne respiratoire	Précordialgie (Angor?)	Cardiac dysrhythmias	7.2.9	Pathologie cardio-vasculaire	Cardiovascular	Exeat	1								41
SANDY Cauvin			1	7	AR	Ecolier	Petit plage	Voiture particulière	2011-06-17	1899-12-31 08:30:00	2011-06-17	1899-12-31 11:30:00	Traumatisme de l'avant-bras droit/chute	Fracture fermée sans déplacement du 1/3< du cubitus de l'avat-bras droit	Fracture of upper limb	16.2.3	Trauma membre supérieur	Trauma	Exeat	1									7
RANAIVOSON Justin	1			25	AR	Etudiant	Mahavoky atsimo	Voiture particulière	2011-06-25	1899-12-31 03:55:00	2011-06-26	1899-12-31 08:00:00	Trauma/ARC	Plaies multiples /ARC	Open wounds	16.6	Plaies multiples	Trauma	Exeat	1							25
RANDRIANTOLOJANAHARY Jean Pierre	1			40	AR	Chauffeur	Marovoay	Voiture particulière	2011-06-25	1899-12-31 23:30:00	2011-06-26	1899-12-31 03:00:00	Trauma/chute dans un escalier (AD)	Plaie faciale sous-orbitaire gauche/AD	Open wounds of head; neck; and trunk	16.6.1	Trauma facial bénin	Trauma	Exeat	1							40
RAKOTOARISOA Jean Christian	1			25	AR	Etudiant	Antananarivo	Voiture particulière	2011-06-26	1899-12-31 02:10:00	2011-06-26	1899-12-31 03:15:00	Trauma/ARC	Contusions et écorchures multiples (crânien, dorsal et MS) /ARC	Superficial injury; contusion	16.8	Multiples écorchures	Trauma	Exeat	1							25
SOARIZIKA Armandine		1		27	VRP (SMIM)	Femme de ménage	Tanambao Sotema	Voiture particulière	2011-06-26	1899-12-31 10:18:00	2011-06-26	1899-12-31 13:09:00	Vertiges+hypothermie+hypotension artérielle	Dystonie neuro-végétative	Somatoform disorders	5.15.7	Pathologie neuro-psy	Neurologic	Exeat	1								27
RATSIMANDRESY Narindra	1			17	AR	Ecolier	Mangarivotra	Voiture particulière	2011-06-28	1899-12-31 19:50:00	2011-06-28	1899-12-31 20:30:00	Trauma /AC	Simple écorchure du genou droit/AC	Superficial injury; contusion	16.8	Trauma membre inférieur	Trauma	Exeat	1							17
RANARIVELO Zézé	1			30	AR	Maçon	Ambondrona	Voiture particulière	2011-06-28	1899-12-31 09:30:00	2011-06-28	1899-12-31 10:00:00	Trauma de la main gauche /AT	Plaie du 4e doigt de la main gauche/AT	Open wounds of extremities	16.6.2	Trauma membre supérieur	Trauma	Exeat	1							30
MASIGNAOMBY	1			24	AR	Tireur de pousse-pousse	Ambalavola	Voiture particulière	2011-06-29	1899-12-31 23:30:00	2011-06-29	1899-12-31	Trauma /AC	Ecorchures multiples	Superficial injury; contusion	16.8	Multiples écorchures	Trauma	Exeat	1							24
RABEMANANJARA Daniel	1			48	VRP (Méd libre)	Gardien	Ambanjabe	Voiture particulière	2011-07-02	1899-12-31 09:15:00	2011-07-02	1899-12-31 11:30:00	Trauma de la jambe G/ARC	Fracture ouverte du 1/3< du tibia de lajambe gauche	Fracture of tibia and fibula	16.2.4.1	Trauma membre inférieur	Trauma	Exeat	1							48
JAOZAFY Florent	1			32	AR	Plongeur	Antanimalandy	Voiture particulière	2011-07-03	1899-12-31	2011-07-03	1899-12-31 09:30:00	Trauma/ARC	Multiples écorchures	Superficial injury; contusion	16.8	Multiples écorchures	Trauma	Exeat	1							32
RAHARINIAIKO Elie		1		26	AR	Ménagère	?	Voiture particulière	2011-07-03	1899-12-31 19:15:00	2011-07-04	1899-12-31 08:00:00	Trauma crânien / AC	Trauma crânien bénin	Intracranial injury	16.4	Trauma crânien bénin	Trauma	Exeat	1								26
RAKOTONDRAVOAVY Jean Paulin	1			25	VR (SMIM)	Agent Somapêche	Morafeno	Voiture particulière	2011-07-06	1899-12-31 01:50:00	2011-07-06	1899-12-31 11:00:00	Vomissement	Intolérance médicamenteuse anti-bilharzien	allergic reactions	17.1.9	Intolérance médicamenteuse	Infectious Disease	Exeat	1							25
RAKOTOARISOA Patrick	1			30	AR	Maçon	Mahavoky	Voiture particulière	2011-07-08	1899-12-31 08:40:00	2011-07-08	1899-12-31 12:05:00	TS/chloroquine	IMV/10cp de nivaquine	Poisoning by other medications and drugs	16.11.2	Toxicologie	Intoxication	Exeat	1							30
RATOBIVONJITSARA	1			33	AR	Vendeur	Tsaramandroso	Voiture particulière	2011-07-08	1899-12-31 23:50:00	2011-07-09	1899-12-31 01:00:00	Trauma/AC	Trauma crânien bénin	Intracranial injury	16.4	Trauma crânien bénin	Trauma	Exeat	1							33
LUCY Todd		1		26	AR	Etudiant	Ankarafantsika	Voiture particulière	2011-07-08	1899-12-31 23:40:00	2011-07-09	1899-12-31 00:55:00	Trauma /AD	Plaie de l'avant-bras/objet tranchant (AD)	Open wounds of extremities	16.6.2	Trauma membre supérieur	Trauma	Exeat	1								26
DAFINA		1		62	AR	Cultivateur	Masiakavoay	Voiture particulière	2011-07-09	1899-12-31 12:00:00	2011-07-09	1899-12-31 13:00:00	Trauma/AC	Contusion fessière gauche	Superficial injury; contusion	16.8	Simple contusion	Trauma	Exeat	1								62
RANDRIANTSALAMA Mahiva		1		24	AR	Commerçant	Tsaramandroso	Voiture particulière	2011-07-09	1899-12-31 23:00:00	2011-07-10	1899-12-31 10:30:00	Trauma/AC	Contusion de l'omoplate gauche	Superficial injury; contusion	16.8	Simple contusion	Trauma	Exeat	1								24
RABESANDRATANA Martial	1			56	AR	Médecin	Tsararano ambony	Voiture particulière	2011-07-12	1899-12-31 14:20:00	2011-07-12	1899-12-31 16:30:00	Trauma du MS	Ecorchure et contusion de l'avant-bras droit	Superficial injury; contusion	16.8	Simple écorchure	Trauma	Exeat	1							56
RAMAHEFARISON Bruno	1			22	AR	Informaticien	Tsararano ambony	Voiture particulière	2011-07-12	1899-12-31 17:15:00	2011-07-12	1899-12-31 21:00:00	Trauma/AC	Contusion thoracique	Superficial injury; contusion	16.8	Simple contusion	Trauma	Exeat	1							22
RANDRIANOHOAVY Nirina Gastella		1		24	AR	Vendeur	Plateau de Tombes	Voiture particulière	2011-07-12	1899-12-31 14:30:00	2011-07-12	1899-12-31 16:32:00	Trauma/AC	Contusion frontale	Superficial injury; contusion	16.8	Simple contusion	Trauma	Exeat	1								24
HALIAVA Jacquis	1			17	AR	Coordinateur	Plateau de Tombes	Voiture particulière	2011-07-12	1899-12-31 14:20:00	2011-07-12	1899-12-31 16:30:00	Trauma/AC	Fracture du 5e doigt de la main gauche	Fracture of upper limb	16.2.3	Trauma de la main	Trauma	Exeat	1							17
JONHASON Rocel	1			21	AR	Agent Aqualma	Antanimalandy	Voiture particulière	2011-07-12	1899-12-31 13:40:00	2011-07-12	1899-12-31 17:00:00	Trauma crânien /AC	Plaie frontale	Open wounds of head; neck; and trunk	16.6.1	Trauma crânien bénin	Trauma	Exeat	1							21
TITA	1			45	AR	Cultivateur	?	Voiture particulière	2011-07-12	1899-12-31 23:30:00	2011-07-13	1899-12-31 13:00:00	Trauma crânien/ARC	Plaie occipitale hémorragique	Open wounds of head; neck; and trunk	16.6.1	Trauma crânien	Trauma	Exeat	1							45
RAZAFINDRAIBE Fabien	1			16	AR	Ouvrier	Mahavoky avaratra	Voiture particulière	2011-07-13	1899-12-31 18:30:00	2011-07-13	1899-12-31 21:00:00	Trauma/encornement de zébu	Contusion de l'HCD par encornement de zébu	Superficial injury; contusion	16.8	Simple contusion	Trauma	Exeat	1							16
BENJAMIN	1			22	VR (CSB Mahabibo)	?	Ambohimandamina	Voiture particulière	2011-07-16	1899-12-31 08:00:00	2011-07-16	1899-12-31 09:30:00	Trauma/ARC	Trauma crânien bénin	Intracranial injury	16.4	Trauma crânien bénin	Trauma	Exeat	1							22
RAZAFINDRASOA Mickaëla		1		35	AR	Coiffeuse	Aranta	Voiture particulière	2011-07-17	1899-12-31 09:05:00	2011-07-17	1899-12-31 10:00:00	Trauma/AC	Contusion du coude droit	Superficial injury; contusion	16.8	Trauma membre supérieur	Trauma	Exeat	1								35
RASOANIRINA Miantsa Virginie		1		18	AR	?	Amborovy	Voiture particulière	2011-07-18	1899-12-31 15:00:00	2011-07-18	1899-12-31 17:30:00	Brûlure / acide	Brûlure par acide de la face et du thorax	Burns	16.9	Brûlure	Trauma	Exeat	1								18
AICHA		1		31	AR	Collecteur	Manga	Voiture particulière	2011-07-18	1899-12-31 17:15:00	2011-07-18	1899-12-31 18:35:00	Trauma/AC	Plaie malléolaire interne du pied droit	Open wounds of extremities	16.6.2	Trauma membre supérieur	Trauma	Exeat	1								31
RAKOTONDRAMARO Martin	1			45	AR	Machiniste	Sotema	Voiture particulière	2011-07-20	1899-12-31 13:40:00	2011-07-20	1899-12-31 15:00:00	Trauma/AT	Plaie du 2e doigt de la main droite/AT	Open wounds of extremities	16.6.2	Trauma de la main	Trauma	Exeat	1							45
FRANCK Duvall	1			41	AR	Forestier	Petit plage Amborovy	Voiture particulière	2011-07-20	1899-12-31	2011-07-25	1899-12-31 11:15:00	Détresse respiratoire	Choc anaphylactique + hémorragie digestive	Shock	17.1.5	Allergie + patho digestive	Anaphylaxis	Exeat	1							41
RAVONINJATOVO Rivo Lala	1			16	AR	Etudiant	Ambohimandamina	Voiture particulière	2011-07-21	1899-12-31 22:00:00	2011-07-22	1899-12-31 07:00:00	Perte de connaissance	Dystonie neuro-végétative	Somatoform disorders	5.15.7	Pathologie neuro-psy	Neurologic	Exeat	1							16
RASOAVELO Voahangy		1		20	AR	Etudiant	Tsararano Nosikely	Voiture particulière	2011-07-24	1899-12-31 11:15:00	2011-07-24	1899-12-31 12:30:00	Trauma/AC	Contusion et écorchures du membre inférieur gauche	Superficial injury; contusion	16.8	Trauma membre inférieur	Trauma	Exeat	1								20
RANDRIANIRINA Fanomezantsoa	1			18	AR	Livreur de poissons	Manjarisoa	Voiture particulière	2011-07-26	1899-12-31 16:00:00	2011-07-26	1899-12-31 17:40:00	Malaise	IMV plurimédicamenteux	Poisoning by other medications and drugs	16.11.2	Toxicologie	Intoxication	Exeat	1							18
SAÏD Abdou Willis William	1			34	AR	Aide-chauffeur	Mangarivotra	Voiture particulière	2011-07-26	1899-12-31 17:30:00	2011-07-26	1899-12-31 18:00:00	Trauma crânien /AC	Plaie frontale gauche	Open wounds of head; neck; and trunk	16.6.1	Trauma crânien bénin	Trauma	Exeat	1							34
HARAVOA Jocelyn	1			27	AR	Chauffeur	Mahavoky	Voiture particulière	2011-07-26	1899-12-31 18:40:00	2011-07-26	1899-12-31 19:00:00	Trauma /AC	Plaie frontale gauche	Open wounds of head; neck; and trunk	16.6.1	Trauma crânien bénin	Trauma	Exeat	1							27
DESINIRINA Henri Michel	1			29	AR	Aide-chauffeur	Marovoay	Voiture particulière	2011-07-26	1899-12-31 18:30:00	2011-07-26	1899-12-31 20:00:00	Trauma crânien /AC	Plaie avec hématome frontal et péri-orbitaire gauche	Open wounds of head; neck; and trunk	16.6.1	Trauma crânien bénin	Trauma	Exeat	1							29
RAMANANTSOA François d'Assise	1			43	AR	Maçon	Notre Dame	Voiture particulière	2011-07-29	1899-12-31 17:23:00	2011-07-29	1899-12-31 18:00:00	Trauma crânien / chute	Trauma crânien bénin / chute	Intracranial injury	16.4	Trauma crânien bénin	Trauma	Exeat	1							43
RADILARIMANANA Nelly Valérie		1		16	AR	Ecolier	Betamanga	Voiture particulière	2011-07-30	1899-12-31 10:10:00	2011-07-30	1899-12-31 14:30:00	Dyspnée	Dystonie neuro-végétative	Somatoform disorders	5.15.7	Pathologie neuro-psy	Neurologic	Exeat	1								16
ALLAH Nantenaina			1	3	AR		Ambalanomby	Voiture particulière	2011-07-31	1899-12-31 15:50:00	2011-07-31	1899-12-31 16:30:00	Trauma facial/AD	Plaie orbitaire droite/AD	Open wounds of head; neck; and trunk	16.6.1	Trauma facial	Trauma	Exeat	1									3
FARATIANA		1		25	AR	Etudiant	Antananarivo	Voiture particulière	2011-08-01	1899-12-31 03:30:00	2011-08-01	1899-12-31 03:30:00	Trauma/ARC	Simple contusion	Superficial injury; contusion	16.8	Simple contusion	Trauma	Exeat	1								25
ANDRIANASOLO Harisoa		1		25	AR	Etudiant	Antananarivo	Voiture particulière	2011-08-01	1899-12-31 03:00:00	2011-08-01	1899-12-31 03:30:00	Trauma/ARC	Ecorchure du genou G	Superficial injury; contusion	16.8	Simple écorchure	Trauma	Exeat	1								25
RAKOTONIRINA Voahanginiaina Elisa		1		24	AR	Etudiant	Antananarivo	Voiture particulière	2011-08-01	1899-12-31 03:30:00	2011-08-01	1899-12-31 04:30:00	Trauma/ARC	Contusion membre inférieur	Superficial injury; contusion	16.8	Trauma membre inférieur	Trauma	Exeat	1								24
ANDRIAMANERY Todisoa Paul	1			23	AR	Etudiant	Antananarivo	Voiture particulière	2011-08-01	1899-12-31 03:30:00	2011-08-01	1899-12-31 04:30:00	Trauma/ARC	Contusion de l'épaule droit	Superficial injury; contusion	16.8	Trauma membre supérieur	Trauma	Exeat	1							23
MATHILDE		1		59	AR	Secrétaire	Antananarivo	Voiture particulière	2011-08-03	1899-12-31 20:45:00	2011-08-03	1899-12-31 23:00:00	HTA	Dystonie neuro-végétative	Somatoform disorders	5.15.7	Pathologie neuro-psy	Neurologic	Exeat	1								59
RAHARIMALALA Martine		1		26	AR	Commerçant	Ambovoalanana	Voiture particulière	2011-08-07	1899-12-31 16:00:00	2011-08-07	1899-12-31 16:00:00	Trauma/AC	Contusion+écorchures de la jambe et du pied droit	Superficial injury; contusion	16.8	Trauma membre inférieur	Trauma	Exeat	1								26
RAKOTOHARIMALALA Mihary			1	6	AR	Ecolier	Mahavoky atsimo	Voiture particulière	2011-08-08	1899-12-31 11:45:00	2011-08-08	1899-12-31 13:00:00	Trauma/chute	Contusion de la jambe gauche	Superficial injury; contusion	16.8	Simple contusion	Trauma	Exeat	1									6
RABENIRINA Edwin	1			44	AR	Gendarme	Caserne	Voiture particulière	2011-08-09	1899-12-31 21:00:00	2011-08-09	1899-12-31 23:45:00	Trauma/ARC	Plaie temporale gauche bénigne	Open wounds of head; neck; and trunk	16.6.1	Trauma crânien bénin	Trauma	Exeat	1							44
MANANJARY Jean Poiseuil	1			29	AR	Chauffeur	Ambalavato	Voiture particulière	2011-08-09	1899-12-31 21:00:00	2011-08-23	1899-12-31 10:49:00	Trauma/ARC	Fracture temporo-fronto-orbitaire	Skull and face fractures	16.2.2	Trauma crânio-facial	Trauma	Exeat	1							29
TAFATSAKA Raymond	1			19	AR	Cultivateur	?	Voiture particulière	2011-08-10	1899-12-31 20:45:00	2011-08-11	1899-12-31 01:00:00	Trauma/AC collectif	Simple contusion de la jambe gauche	Superficial injury; contusion	16.8	Trauma membre inférieur	Trauma	Exeat	1							19
SITRAKA Gilbert	1			32	AR	Cultivateur	Manaratsandry	Voiture particulière	2011-08-10	1899-12-31 20:45:00	2011-09-11	1899-12-31 02:45:00	Trauma/AC collectif	Simple contusion cervicale	Superficial injury; contusion	16.8	Simple contusion	Trauma	Exeat	1							32
RANDRIANARIMANANA	1			45	AR	Chauffeur	Ambalavato	Voiture particulière	2011-08-11	1899-12-31 07:45:00	2011-08-11	?	Trauma/AD	Fracture ouverte de P2 du 1er doigt de la main gauche	Fracture of upper limb	16.2.3	Trauma de la main	Trauma	Exeat	1							45
RANDRIANAMBININA Adolphe Mosa	1			36	AR	Cultivateur	Betamanga	Voiture particulière	2011-08-11	1899-12-31 22:30:00	2011-08-12	1899-12-31 00:30:00	Trauma/arme blanche	Plaie de l'avant-bras droit	Open wounds of extremities	16.6.2	Trauma membre supérieur	Trauma	Exeat	1							36
JULIENNE			1	14	AR	?	?	Voiture particulière	2011-08-11	1899-12-31 22:30:00	?	?	Trauma/arme blanche	Plaie superficielle de la jambe droite	Open wounds of extremities	16.6.2	Trauma membre inférieur	Trauma	Exeat	1									14
RANDRIANANTENAINA Oliva Vonisoa			1	8	AR	Ecolier	Antananarivo	Voiture particulière	2011-08-13	1899-12-31 17:00:00	2011-08-13	1899-12-31 18:30:00	Trauma /AC collectif	Trauma frontal	injury and poisoning	16	Trauma crânien bénin	Trauma	Exeat	1									8
RAZAFIMAMONJY Vero		1		30	AR	?	Antananarivo	Voiture particulière	2011-08-13	1899-12-31 17:00:00	2011-08-13	1899-12-31 18:30:00	Trauma /AC collectif	Trauma crânien bénin	Intracranial injury	16.4	Trauma crânien bénin	Trauma	Exeat	1								30
RAZANALISOA Harimalala		1		37	AR	?	Antananarivo	Voiture particulière	2011-08-13	1899-12-31 17:00:00	2011-08-13	1899-12-31 18:30:00	Trauma /AC collectif	Plaies multiples	Open wounds	16.6	Plaies multiples	Trauma	Exeat	1								37
HARENA			1	7	AR	Ecolier	Antananarivo	Voiture particulière	2011-08-13	1899-12-31 17:00:00	2011-08-13	1899-12-31 18:30:00	Trauma /AC collectif	H2matome sus-orbitaire gauche	Superficial injury; contusion	16.8	Trauma facial bénin	Trauma	Exeat	1									7
RAKOTOARIJAONA Teliniaina Manguta			1	6	AR	Ecolier	Antananarivo	Voiture particulière	2011-08-13	1899-12-31 17:00:00	2011-08-13	1899-12-31 18:30:00	Trauma /AC collectif	Ecorchure du genou	Superficial injury; contusion	16.8	Simple écorchure	Trauma	Exeat	1									6
RANDRIANANTENAINA Noria Dimbisoa			1	13	AR	Ecolier	Antananarivo	Voiture particulière	2011-08-13	1899-12-31 17:00:00	2011-08-13	1899-12-31 18:30:00	Trauma /AC collectif	Ecorchure de la jambe gauche et plaie de la main gauche	Superficial injury; contusion	16.8	Simple écorchure	Trauma	Exeat	1									13
RANDRIANANTENAINA Sedera Valisoa			1	6	AR	Ecolier	Antananarivo	Voiture particulière	2011-08-13	1899-12-31 17:00:00	2011-08-13	1899-12-31 18:30:00	Trauma /AC collectif	Ecorchure de la cheville gauche et du 5e doigt	Superficial injury; contusion	16.8	Simple écorchure	Trauma	Exeat	1									6
RANDRIANANTENAINA Edna Lovasoa			1	10	AR	Ecolier	Antananarivo	Voiture particulière	2011-08-13	1899-12-31 17:00:00	2011-08-13	1899-12-31 18:30:00	Trauma /AC collectif	Ecchymose ethmoïdo-nasale	Superficial injury; contusion	16.8	Trauma facial bénin	Trauma	Exeat	1									10
HAINGONOMENJANAHARY Joela			1	6	AR	Ecolier	Antananarivo	Voiture particulière	2011-08-13	1899-12-31 17:00:00	2011-08-13	1899-12-31 18:30:00	Trauma /AC collectif	Contusion de la face	Superficial injury; contusion	16.8	Trauma facial bénin	Trauma	Exeat	1									6
NAOMIHARISOA Jasara			1	11	AR	Ecolier	Antananarivo	Voiture particulière	2011-08-13	1899-12-31 17:00:00	2011-08-13	1899-12-31 18:30:00	Trauma /AC collectif	Contusion crânio-faciale	Superficial injury; contusion	16.8	Trauma crânio-facial bénigne	Trauma	Exeat	1									11
RANAIVONARIVO Bakoly		1		62	AR	Ingénieur	Antananarivo	Voiture particulière	2011-08-13	1899-12-31 21:30:00	2011-08-13	1899-12-31 22:13:00	Trauma du genou/AC	Contusion bénigne du genou gauche	Superficial injury; contusion	16.8	Trauma membre inférieur	Trauma	Exeat	1								62
RATSIMBAZAFY Rijaharisoa	1			33	AR	?	Antananarivo	Voiture particulière	2011-08-13	1899-12-31 17:00:00	2011-08-13	1899-12-31 18:30:00	Trauma /AC collectif	Contusion bénigne de l'épaule droite	Superficial injury; contusion	16.8	Trauma membre supérieur	Trauma	Exeat	1							33
FANOMEZANTSOA Fanoela			1	2	AR		Antananarivo	Voiture particulière	2011-08-13	1899-12-31 17:00:00	2011-08-13	1899-12-31 18:30:00	Trauma /AC collectif	Plaie temporale droite	Open wounds of head; neck; and trunk	16.6.1	Trauma crânien bénin	Trauma	Exeat	1									2
VALIMBAVAKA Finiavana			1	11	AR	Ecolier	Antananarivo	Voiture particulière	2011-08-13	1899-12-31 17:00:00	2011-08-13	1899-12-31 18:30:00	Trauma /AC collectif	Plaie sus-claviculaire droite	Open wounds of head; neck; and trunk	16.6.1	Trauma membre supérieur	Trauma	Exeat	1									11
TODINIAINA Fenohery			1	8	AR	Ecolier	Antananarivo	Voiture particulière	2011-08-13	1899-12-31 17:00:00	2011-08-13	1899-12-31 18:30:00	Trauma /AC collectif	Plaie gingivale inférieure	Open wounds of head; neck; and trunk	16.6.1	Trauma facial bénin	Trauma	Exeat	1									8
FULGENCE	1			30	AR	?	Antananarivo	Voiture particulière	2011-08-13	1899-12-31 17:00:00	2011-08-13	1899-12-31 16:45:00	Trauma du gros orteil/écrasement d'une moto	Plaie du gros orteil droit	Open wounds of extremities	16.6.2	Trauma membre inférieur	Trauma	Exeat	1							30
RAKOTO Vololoniaina		1		55	AR	?	Antananarivo	Voiture particulière	2011-08-13	1899-12-31 17:00:00	2011-08-13	1899-12-31 18:30:00	Trauma /AC collectif	Plaie du coude et de la main droite	Open wounds of extremities	16.6.2	Trauma membre supérieur	Trauma	Exeat	1								55
RAHARIAMIZAHA Isaie Fitianiaina	1			31	AR	?	Antananarivo	Voiture particulière	2011-08-13	1899-12-31 17:00:00	2011-08-13	1899-12-31 18:30:00	Trauma /AC collectif	Plaie délabrée de la face interne du bras droit	Open wounds of extremities	16.6.2	Trauma membre supérieur	Trauma	Exeat	1							31
VOLOLONIAINA Jeannine Pâquerette		1		30	AR	?	Antananarivo	Voiture particulière	2011-08-13	1899-12-31 17:00:00	2011-08-13	1899-12-31 18:30:00	Trauma /AC collectif	Plaie de la face dorsale de la main gauche	Open wounds of extremities	16.6.2	Trauma de la main	Trauma	Exeat	1								30
RANDRIANANTENAINA Sabrina Lovasoa			1	4	AR	Ecolier	Antananarivo	Voiture particulière	2011-08-13	1899-12-31 17:00:00	2011-08-14	1899-12-31 10:30:00	Trauma /AC collectif	Fracture de l'humérus gauche	Fracture of humerus	16.2.3.1	Trauma membre supérieur	Trauma	Exeat	1									4
JULIANA			1	3	AR	?	Amborovy	Voiture particulière	2011-08-14	1899-12-31 18:00:00	2011-08-15	1899-12-31 08:30:00	Trauma/AC	Trauma crânien bénin	Intracranial injury	16.4	Trauma crânien bénin	Trauma	Exeat	1									3
RASOANIRINA Marcelline		1		50	AR	Ménagère	Manga	Voiture particulière	2011-08-16	1899-12-31 18:30:00	2011-08-16	1899-12-31 19:00:00	Trauma/AC (chute d'une pousse-pousse)	Simple contusion	Superficial injury; contusion	16.8	Simple contusion	Trauma	Exeat	1								50
ASDJAD		1		24	AR	Etudiant	?	Voiture particulière	2011-08-17	1899-12-31 11:10:00	2011-08-17	1899-12-31 13:20:00	Palpitation post-AC	Choc émotionnel	mood disorders	5.8	Pathologie neuro-psy	Neurologic	Exeat	1								24
NY MIALY	1			19	AR	Etudiant	Antananarivo	Voiture particulière	2011-08-17	1899-12-31 20:30:00	2011-08-17	1899-12-31 22:30:00	Trauma/AC	Plaie délabrée inter-orteils (4e et 5e orteils)	Open wounds of extremities	16.6.2	Trauma membre inférieur	Trauma	Exeat	1							19
RANJA Rebecca			1	7	AR	Ecolier	Nicoletta	Voiture particulière	2011-08-18	1899-12-31 10:30:00	2011-08-18	1899-12-31 14:00:00	Trauma/chute (AD)	Plaie de la face postérieure du pavillon de l'oreille gauche	Open wounds of head; neck; and trunk	16.6.1	Trauma crânien bénin	Trauma	Exeat	1									7
FITAHIANA			1	9	AR	Ecolier	Mahatsinjo	Voiture particulière	2011-08-19	1899-12-31 15:10:00	2011-08-19	1899-12-31 18:25:00	Trauma/AC	Contusion frontale et occipitale	Superficial injury; contusion	16.8	Trauma crânien bénin	Trauma	Exeat	1									9
MIOMBEKE	1			24	AR	Transporteur	Tsararano	Voiture particulière	2011-08-19	1899-12-31 11:35:00	2011-08-19	1899-12-31 14:00:00	Trauma/AT	Plaie du dos du pied droit	Open wounds of extremities	16.6.2	Trauma membre inférieur	Trauma	Exeat	1							24
MALALA Hajanie		1		15	AR	Ecolier	Androva	Voiture particulière	2011-08-20	1899-12-31 00:02:00	2011-08-20	1899-12-31 02:20:00	Dyspnée	Intolérance d'eau glacée	intestinal infection	9.1	Pathologie digestive	Gastrointestinal	Exeat	1								15
VICTORIA		1		37	AR	Ménagère	Antanimasaja	Voiture particulière	2011-08-20	1899-12-31 00:15:00	2011-08-21	1899-12-31 01:30:00	Trauma/AC	Choc émotionnel post-traumatique	mood disorders	5.8	Simple contusion	Trauma	Exeat	1								37
FILY	1			20	AR	Mécanicien	Ambohimandamina	Voiture particulière	2011-08-21	1899-12-31 00:30:00	2011-08-21	1899-12-31 01:30:00	Trauma/AC	Contusion du genou droit + multiples écorchures	Superficial injury; contusion	16.8	Simple contusion	Trauma	Exeat	1							20
RANDRIANAIVOSON Hanitra Lalaina	1			27	AR	Agent de sécurité	Antananarivo	Voiture particulière	2011-08-24	1899-12-31 12:27:00	2011-08-24	1899-12-31 17:45:00	Noyade	Noyade	injury and poisoning	16	Noyade	Pulmonary	Exeat	1							27
ANDRIAMBELONANDRO Noah			1	1.66667	AR		Antananarivo	Voiture particulière	2011-08-25	1899-12-31 21:05:00	2011-08-26	1899-12-31 21:45:00	Trauma/AD	Saignement de la cieconcision	Hemorrhage or hematoma complicating a procedure	16.10.2.5	Trauma génito-urinaire	Trauma	Exeat	1									1.66667
RANDRIAMAHENINA R. Théodore	1			54	AR	DGAT Min intérieur	Antananarivo	Voiture particulière	2011-08-27	1899-12-31 18:15:00	2011-08-27	1899-12-31 21:30:00	Dyspnée	Crise d'asthme	Asthma	8.3	Pathologie respiratoire	Pulmonary	Exeat	1							54
BACHIR Kazirdine	1			31	AR	?	Belobaka	Voiture particulière	2011-08-28	1899-12-31 17:05:00	2011-08-28	1899-12-31 20:00:00	Trauma/AC	Multiples écorchures	Superficial injury; contusion	16.8	Multiples écorchures	Trauma	Exeat	1							31
RAKOTOMALALA Yves Herilanto	1			40	AR	Commerçant	Antananarivo	Voiture particulière	2011-08-31	1899-12-31 09:45:00	2011-09-03	1899-12-31 09:00:00	Dyspnée + asthénie	Acido-cétose diabétique + infection digestive	Diabetes with ketoacidosis or uncontrolled diabetes	3.3.1	Infection+endocrinologie	Infectious Disease	Exeat	1							40
RAZAFIMAHATRATRA Avotriniaina	1			21	AR	Etudiant	Amborovy	Voiture particulière	2011-09-03	1899-12-31 18:15:00	2011-09-03	1899-12-31 20:45:00	Malaise brutale+vertiges	Hypocalcémie	Fluid and electrolyte disorders	3.8	Pathologie métabolique	Endocrine	Exeat	1							21
RAKOTOMANALINA Andry	1			27	AR	Enseignant	Antananarivo	Voiture particulière	2011-09-03	1899-12-31 20:50:00	2011-09-04	1899-12-31	Malaise post-émotionnelle	Dystonie neuro-végétative	Somatoform disorders	5.15.7	Pathologie neuro-psy	Neurologic	Exeat	1							27
ELISE		1		38	AR	Ménagère	Ambohimandamina	Voiture particulière	2011-09-04	1899-12-31 04:30:00	2011-09-04	1899-12-31 08:05:00	Poussée hypertensive	HTA	Hypertension	7.1	Pathologie cardio-vasculaire	Cardiovascular	Exeat	1								38
VOIZY Béatrice		1		30	VRP (Méd libre)	Femme d'affaire	Antananarivo	Voiture particulière	2011-09-04	1899-12-31 11:37:00	2011-09-04	1899-12-31 13:00:00	Douleur abdominale aiguë	Pyosalpinx	Inflammatory diseases of female pelvic organs	10.3.2	Pathologie gynéco-obstétrique	Gynecologic	Exeat	1								30
ABDALLAH Rosali	1			27	AR	Commerçant	Ambalavato	Voiture particulière	2011-09-05	1899-12-31 11:30:00	2011-09-05	1899-12-31 17:00:00	Trauma/AC	Contusion du nez + multiples écorchures	Superficial injury; contusion	16.8	Ecorchures multiples	Trauma	Exeat	1							27
ANDRIAMANGASOAVINA Philibert	1			27	AR	Agent de sécurité	Amborovy	Voiture particulière	2011-09-06	1899-12-31 14:30:00	2011-09-06	1899-12-31 18:15:00	Douleur lombaire + épigastralgie	Syndrome d'ulcère gastrique	Gastric ulcer	9.4.2.1	Pathologie digestive	Gastrointestinal	Exeat	1							27
RAZAFINDRASOA Iantsa Malalatiana		1		19	AR	Etudiant	Tsararano ambany	Voiture particulière	2011-09-08	1899-12-31 16:30:00	2011-09-08	1899-12-31 19:00:00	Vertiges	Dystonie neuro-végétative	Somatoform disorders	5.15.7	Pathologie neuro-psy	Neurologic	Exeat	1								19
RANDRIANARISON Marion	1			19	VR (CSB Amborovy)	Etudiant	Antananarivo	Voiture particulière	2011-09-09	1899-12-31 11:30:00	2011-09-09	1899-12-31 17:00:00	Diarrhées aiguës +vomissement+douleur abdominale	Gastro-entérite fébrile	intestinal infection	9.1	Pathologie infectieuse	Infectious Disease	Exeat	1							19
ANNA Tireau		1		75	AR	Religieuse	Antananarivo	Voiture particulière	2011-09-10	1899-12-31 11:13:00	2011-09-10	1899-12-31 18:00:00	Trauma/AC	Plaie superficielle de l'hypocondre gauche	Open wounds of extremities	16.6.2	Plaie simple	Trauma	Exeat	1								75
INCONNU	1			30	AR	?	?	Voiture particulière	2011-09-10	1899-12-31 22:15:00	2011-09-11	1899-12-31 14:30:00	Trauma crânien	Trauma crânien bénin	Intracranial injury	16.4	Trauma crânien bénin	Trauma	Exeat	1							30
RANDRIAMANANTENA Vololonirina Hasina		1		25	AR	Etudiant	Antananarivo	Voiture particulière	2011-09-12	1899-12-31 18:30:00	2011-09-12	1899-12-31 21:30:00	Douleur abdominale	Intoxication alimentaire	intestinal infection	9.1	Pathologie digestive	Gastrointestinal	Exeat	1								25
RAINIZANAMARO Valentin Anathole	1			26	AR	Tourneur	Abattoir	Voiture particulière	2011-09-13	1899-12-31 07:45:00	2011-09-13	1899-12-31 09:00:00	Trauma/AT	Contusion +écorchures multiples	Superficial injury; contusion	16.8	Ecorchures multiples	Trauma	Exeat	1							26
ARENA			1	5	AR		Ambondrona	Voiture particulière	2011-09-16	1899-12-31 20:51:00	2011-09-16	1899-12-31 21:30:00	Trauma/chute	Simple contusion	Superficial injury; contusion	16.8	Simple contusion	Trauma	Exeat	1									5
RANJANIAINA Andreas Manantena		1		16	AR	Ecolier	Tsararano	Voiture particulière	2011-09-17	1899-12-31 10:50:00	2011-09-17	1899-12-31 11:30:00	Céphalées	Hypoglycémie	Endocrine; nutritional; and metabolic diseases and immunity disorders	3	Pathologie métabolique	Endocrine	Exeat	1								16
RANAIVOSON Rapatsalahy Manou	1			16	AR	Ecolier	Antananarivo	Voiture particulière	2011-09-17	1899-12-31 23:35:00	2011-09-18	1899-12-31 08:25:00	Perte de connaissance + hallucination	Agitation + syndrome hallucinatinatoire	Delirium dementia and amnestic and other cognitive disorders	5.4	Pathologie neuro-psy	Neurologic	Exeat	1							16
RASOLONIAINA Herimampionona			1	12	AR	Ecolier	Antananarivo	Voiture particulière	2011-09-17	1899-12-31 23:35:00	2011-09-18	1899-12-31 08:20:00	Crises convulsives + agitation +hallucination	Agitation + syndrome hallucinatinatoire	Delirium dementia and amnestic and other cognitive disorders	5.4	Pathologie neuro-psy	Neurologic	Exeat	1									12
RAZANATSEHENO Hajatiana	1			21	AR	Etudiant	Androva	Voiture particulière	2011-09-20	1899-12-31 10:05:00	2011-09-20	1899-12-31 16:30:00	Douleur abdominale	Intolérance alimentaire	intestinal infection	9.1	Pathologie digestive	Gastrointestinal	Exeat	1							21
RANDRIANANDRASANA Yvonnette Léonide		1		28	AR	Vendeur	Antanimasaja	Voiture particulière	2011-09-21	1899-12-31 17:40:00	2011-09-21	1899-12-31 19:40:00	Trauma/AC	Contusion simple du pied gauche	Superficial injury; contusion	16.8	Simple contusion	Trauma	Exeat	1								28
ANDRIANOMANINA Eli	1			39	AR	Chauffeur	Antsirabe	Voiture particulière	2011-09-22	1899-12-31 04:20:00	2011-09-22	1899-12-31 09:34:00	Douleur abdominale + diarrhées	Intoxication alimentaire	intestinal infection	9.1	Pathologie digestive	Gastrointestinal	Exeat	1							39
RAKOTOARIVONY Daudet	1			19	AR	Etudiant	Antsirabe	Voiture particulière	2011-09-22	1899-12-31 04:25:00	2011-09-22	1899-12-31 09:00:00	Douleur abdominale aiguë	Gastro-entérite	intestinal infection	9.1	Pathologie infectieuse	Infectious Disease	Exeat	1							19
ANDRIAMAROMANANA Heliarisoa		1		15	AR	Ecolier	Antsirabe	Voiture particulière	2011-09-22	1899-12-31 04:20:00	2011-09-22	1899-12-31 09:00:00	Douleur abdominale aiguë	Gastro-entérite	intestinal infection	9.1	Pathologie infectieuse	Infectious Disease	Exeat	1								15
IANDRY	1			19	VR (CSB Ambondromamy)	Aide-chauffeur	Andranofasika	Voiture particulière	2011-09-22	1899-12-31 20:00:00	2011-09-23	1899-12-31 08:30:00	Trauma/AC	Plaie délabrée de la cuisse droite	Open wounds of extremities	16.6.2	Trauma membre inférieur	Trauma	Exeat	1							19
RAHANITRINIAINA Rivosoa	1			51	AR	Transporteur	Antananarivo	Voiture particulière	2011-09-24	1899-12-31 19:30:00	2011-09-24	1899-12-31 21:00:00	Trauma/chute	Simple contusion de la rotule gauche	Superficial injury; contusion	16.8	Simple contusion	Trauma	Exeat	1							51
RAKOTOMALALA Georges	1			16	AR	Etudiant	Ambondrona	Voiture particulière	2011-09-24	1899-12-31 22:20:00	2011-09-25	1899-12-31 14:30:00	Douleur diffuse de FIG+arrêt de matière et de gaz	Colopathie fonctionnelle	Lower gastrointestinal disorders	9.6	Pathologie digestive	Gastrointestinal	Exeat	1							16
ANDRIANABISON Ando Lovanirina	1			20	VRP (Méd libre)	Etudiant	Antanimasaja	Voiture particulière	2011-09-25	1899-12-31 20:15:00	2011-09-26	1899-12-31 01:00:00	Trauma/AC	Contusion de la cuisse gauche	Superficial injury; contusion	16.8	Simple contusion	Trauma	Exeat	1							20
ANDRIAMANJAONINA Lalanirina		1		20	VRP (Méd libre)	Etudiant	Tsaramandroso	Voiture particulière	2011-09-27	1899-12-31 16:30:00	2011-09-27	1899-12-31 18:30:00	Trauma/AC	Contusion de la pommette gauche	Superficial injury; contusion	16.8	Simple contusion	Trauma	Exeat	1								20
ALAIN Russot	1			43	AR	Gérant Sté Arc-en-ciel	Près croix rouge	Voiture particulière	2011-10-01	1899-12-31 16:00:00	2011-10-02	1899-12-31 08:10:00	Brûlure/essence	Brûlure du 2nd degré sur 20% (Tronc antérieur + MSG)	Burns	16.9	Brûlure	Trauma	Exeat	1							43
RAHARIMANANA Njivatiana		1		23	AR	Ménagère	Marovato Abattoir	Voiture particulière	2011-10-02	1899-12-31 14:00:00	2011-10-02	1899-12-31 17:00:00	Douleur FID	Lithiase rénale droite	calculus of kidney	10.1.5.1	Pathologie urologique	Urologic	Exeat	1								23
RAKOTOZARIVELO	1			54	AR	Enseignant	Amparihingidro	Voiture particulière	2011-10-03	1899-12-31 13:00:00	2011-10-03	1899-12-31 17:15:00	Douleur thoracique post-traumatique/AC	Contusion thoracique post-traumatique/AC	Superficial injury; contusion	16.8	Trauma thoracique	Trauma	Exeat	1							54
TSARAMAHAZO Augustin	1			23	VRP (Méd libre)	Etudiant	Ambondrona	Voiture particulière	2011-10-03	1899-12-31 12:45:00	2011-10-03	1899-12-31 20:00:00	Trauma crânien/chute	Contusion péri-orbitaire gauche	Superficial injury; contusion	16.8	Trauma facial bénin	Trauma	Exeat	1							23
RAKOTOMANANA Jean Claude	1			32	VRP (Méd libre)	Prêtre	Evéché	Voiture particulière	2011-10-06	1899-12-31 15:00:00	2011-10-07	1899-12-31 07:00:00	Douleur abdominale FID + hypogastre	Fièvre typhoïde	Other gram negative septicemia	1.1.2.4	Pathologie infectieuse	Infectious Disease	Exeat	1							32
RAJANARISON Thierry	1			28	AR	?	Mahabibokely	Voiture particulière	2011-10-08	1899-12-31 12:15:00	2011-10-08	1899-12-31 12:45:00	Trauma/AC	Simple écorchure du pouce droit+contusion bénigne	Superficial injury; contusion	16.8	Simples écorchures	Trauma	Exeat	1							28
ANDRIAMIHAJA Harisoa	1			57	AR	Cultivateur	Ambanjabe	Voiture particulière	2011-10-08	1899-12-31 13:45:00	2011-10-08	1899-12-31 17:40:00	Trauma de l'avant-bras gauche/AC	Fracture fermée des 2 os de l'avant-bras gauche avec dépalcement et 3e fragment	Fracture of radius and ulna	16.2.3.2	Trauma membre supérieur	Trauma	Exeat	1							57
RANDRIAMARO Bruno	1			35	AR	Electricien	Mahabibokely	Voiture particulière	2011-10-09	1899-12-31 18:35:00	2011-10-09	1899-12-31 21:00:00	Trauma/AC	Ecorchures multiples	Superficial injury; contusion	16.8	Ecorchures multiples	Trauma	Exeat	1							35
RAZANAMIALY Suzanna		1		28	AR	Ménagère	Mahabibokely	Voiture particulière	2011-10-09	1899-12-31 18:35:00	2011-10-09	1899-12-31 21:00:00	Trauma/AC	Ecorchures multiples	Superficial injury; contusion	16.8	Ecorchures multiples	Trauma	Exeat	1								28
JOHNSON Tania			1	10	AR	Ecolier	Antanimasaja	Voiture particulière	2011-10-12	1899-12-31 20:10:00	2011-10-12	1899-12-31 22:00:00	Trauma/AC	Ecorchures multiples	Superficial injury; contusion	16.8	Ecorchures multiples	Trauma	Exeat	1									10
RABENANTENAINA			1	6	AR	Ecolier	Mahavoky	Voiture particulière	2011-10-14	1899-12-31 17:05:00	2011-10-14	1899-12-31 17:30:00	Trauma crânien bénin/AC	Trauma crânien bénin	Intracranial injury	16.4	Trauma crânien bénin	Trauma	Exeat	1									6
RAZAFINDRAMANANA Babou Robine		1		46	AR	Ménagère	Belinta	Voiture particulière	2011-10-15	1899-12-31 00:15:00	2011-10-15	1899-12-31 07:00:00	Douleur aiguë du flanc droit+vomissement	Intolérance alimentaire	intestinal infection	9.1	Pathologie digestive	Gastrointestinal	Exeat	1								46
RAZAFINRAKETAKA Bodonandrasana		1		50	AR	Ménagère	Majunga be	Voiture particulière	2011-10-15	1899-12-31 12:50:00	2011-10-16	1899-12-31 06:30:00	Perte de connaissance	Bradycardie post-médicamenteuse (Novaten 50)	Cardiac dysrhythmias	7.2.9	Intolérance médicamenteuse	Infectious Disease	Exeat	1								50
RALINORO Fanja		1		37	AR	Vendeur	Androva	Voiture particulière	2011-10-16	1899-12-31 08:00:00	2011-10-16	1899-12-31 18:00:00	Asthénie+anorexie	Fièvre typhoïde	Other gram negative septicemia	1.1.2.4	Pathologie infectieuse	Infectious Disease	Exeat	1								37
TAHIRY			1	5	AR	Ecolier	Manjarisoa	Voiture particulière	2011-10-16	1899-12-31 12:50:00	2011-10-16	1899-12-31 13:10:00	Ingestion accidentelle de corps étranger (pièce de bicyclette)	Ingestion accidentelle de corps étranger (pièce de bicyclette)	Other disorders of stomach and duodenum	9.4.4	Corps étranger	Trauma	Exeat	1									5
RASOLOMANANA Honorine		1		37	AR	?	Amborovy	Voiture particulière	2011-10-17	1899-12-31 04:17:00	2011-10-17	1899-12-31 05:30:00	Trauma/ARC	Ecorchures des genoux	Superficial injury; contusion	16.8	Simples écorchures	Trauma	Exeat	1								37
JURIE Human	1			60	AR	Musicien	Afrique du sud	Voiture particulière	2011-10-17	1899-12-31 12:30:00	2011-10-17	1899-12-31 15:00:00	Trauma MS gauche/chute	Fracture de Pouteau-Colles gauche	Fracture of radius and ulna	16.2.3.2	Trauma membre supérieur	Trauma	Exeat	1							60
EUPHRASIE		1		19	AR	Ménagère	Ambalanomby	Voiture particulière	2011-10-18	1899-12-31 09:40:00	2011-10-18	1899-12-31 11:30:00	TS/Nivaquine+paracétamol	IMV/Nivaquine +paracétamol	Poisoning by other medications and drugs	16.11.2	Toxicologie	Intoxication	Exeat	1								19
RAKOTONDRAVELO Julio	1			16	AR	Lycéen	Androva	Voiture particulière	2011-10-19	1899-12-31 19:00:00	2011-10-20	1899-12-31 08:00:00	Douleur abdominale intense	Colique néphrétique	Calculus of urinary tract	10.1.5	Pathologie urologique	Urologic	Exeat	1							16
HARILALAINA Marie Olga		1		28	VRP (Aina Vao)	Ménagère	Antanimasaja	Voiture particulière	2011-10-19	1899-12-31 17:07:00	2011-10-20	1899-12-31 08:00:00	Perte de connaissance	Dystonie neuro-végétative	Somatoform disorders	5.15.7	Pathologie neuro-psy	Neurologic	Exeat	1								28
BERNARDIN Jean Frédéric	1			27	AR	Bricoleur	Tsararano	Voiture particulière	2011-10-20	1899-12-31 09:30:00	2011-10-20	1899-12-31 14:15:00	Trauma de la jambe/AC	Contusion des 2 jambes	Superficial injury; contusion	16.8	Simple contusion	Trauma	Exeat	1							27
RAZANADRASOA Stecy			1	8	AR	Ecolier	Tanambao Ambalavato	Voiture particulière	2011-10-22	1899-12-31 15:00:00	2011-10-23	1899-12-31 07:00:00	Noyade	Noyade	injury and poisoning	16	Noyade	Pulmonary	Exeat	1									8
RAKOTONDRAFARA Simon Joël	1			21	AR	Bijoutier	Mazava huile	Voiture particulière	2011-10-23	1899-12-31 17:20:00	2011-10-23	1899-12-31 18:30:00	Trauma/AC (Moto)	Multiples écorchures	Superficial injury; contusion	16.8	Ecorchures multiples	Trauma	Exeat	1							21
GOERGELINE Lennusia		1		24	AR	Ménagère	Sotema	Voiture particulière	2011-10-23	1899-12-31 15:45:00	2011-10-23	1899-12-31 16:00:00	Trauma/AC	Ecorchures multiples +contusion du MS droit	Superficial injury; contusion	16.8	Ecorchures multiples	Trauma	Exeat	1								24
RANDRIAMAMPIONONA		1		51	AR	Commerçant	Antanimalandy	Voiture particulière	2011-10-29	1899-12-31 22:00:00	2011-10-30	1899-12-31 09:00:00	Trauma/ARC	DNV+Trauma crânien bénin	Somatoform disorders	5.15.7	Trauma crânien bénin	Trauma	Exeat	1								51
JAOMANESY Delphin	1			33	AR	Marin	Fiofio	Voiture particulière	2011-10-31	1899-12-31 12:45:00	2011-10-31	1899-12-31 18:30:00	Crises convulsives	Paludisme + coma éthylique	Other infections; including parasitic	1.4	Pathologie infectieuse	Infectious Disease	Exeat	1							33
RATSIMANDRESISON Olivia Ursula		1		32	AR	Ménagère	?	Voiture particulière	2011-10-31	1899-12-31 02:05:00	2011-10-31	1899-12-31 03:00:00	Trauma/ARC	Ecchymose+œdème facial+ contusion de la jambe G +	Superficial injury; contusion	16.8	Trauma facial bénin	Trauma	Exeat	1								32
ZAFIMAROSON Adrien	1			45	AR	Commerçant	Petit plage	Voiture particulière	2011-11-02	1899-12-31 20:45:00	2011-11-02	1899-12-31 22:15:00	Trauma des doigts/AT	Plaie de P3 des 3e et 4e doigts de la main droite	Open wounds of extremities	16.6.2	Trauma de la main	Trauma	Exeat	1							45
RAZAFIMAMPIONONA Aimé Paul	1			44	AR	Chauffeur	Zahamotel	Voiture particulière	2011-11-03	1899-12-31 14:35:00	2011-11-03	1899-12-31 15:15:00	Plaie /chute	Plaie frontale gauche	Open wounds of head; neck; and trunk	16.6.1	Trauma crânien bénin	Trauma	Exeat	1							44
RANAIVOSON Antonio	1			41	AR	Artiste (Batteur)	Ambohimandamina	Voiture particulière	2011-11-04	1899-12-31 10:09:00	2011-11-04	1899-12-31 10:30:00	Trauma du pied gauche/AC	Contusion du dos du pied et de la cheville gauche	Superficial injury; contusion	16.8	Trauma membre inférieur	Trauma	Exeat	1							41
RABEONY Jacquot	1			51	AR	Agent comptable	La Corniche	Voiture particulière	2011-11-05	1899-12-31 18:40:00	2011-11-05	1899-12-31 20:10:00	Trauma crânien/AD	Trauma crânien bénin	Intracranial injury	16.4	Trauma crânien bénin	Trauma	Exeat	1							51
MARIE PIERRE			1	9.5	VRP (Méd libre)	Ecolier	Plateau des tombes	Voiture particulière	2011-11-05	1899-12-31 20:50:00	2011-11-05	1899-12-31 21:45:00	Trauma du pied droit/chute	Entorse bénigne du pied droit/chute	Sprains and strains	16.7	Trauma membre inférieur	Trauma	Exeat	1									9.5
ZAFINDRASOAMA Josiane		1		25	AR	Vendeur	Jardin Caïla	Voiture particulière	2011-11-05	1899-12-31 11:15:00	2011-11-05	1899-12-31 13:15:00	TS/Nivaquine	IMV/Nivaquine	Poisoning by other medications and drugs	16.11.2	Toxicologie	Intoxication	Exeat	1								25
THOMAS	1			60	AR	?	SDF	Voiture particulière	2011-11-06	1899-12-31 07:36:00	2011-11-06	1899-12-31 08:20:00	Perte de connaissance	Hypoglycémie	Endocrine; nutritional; and metabolic diseases and immunity disorders	3	Pathologie métabolique	Endocrine	Exeat	1							60
RAKOTOMANGA Xavier	1			23	AR	Artisan	Tsaramandroso	Voiture particulière	2011-11-06	1899-12-31 16:30:00	2011-11-06	1899-12-31 17:10:00	Trauma/AC	Plaies+écorchures des 2 jambes	Open wounds of extremities	16.6.2	Trauma membre inférieur	Trauma	Exeat	1							23
RAZAFINDRATIANA Cécile		1		71	AR	?	Tsaramandroso	Voiture particulière	2011-11-11	1899-12-31 21:32:00	2011-11-12	1899-12-31 08:45:00	Toux chroniques + asthénie	Pneumopathie	Pneumonia (except that caused by TB or STD)	8.1.1	Pathologie infectieuse	Infectious Disease	Exeat	1								71
SOAMANITRA Iris Fabiola			1	12	AR	Ecolier	?	Voiture particulière	2011-11-12	1899-12-31 19:50:00	2011-11-12	1899-12-31 21:27:00	Tremblement + trouble de conscience	Coup de chaleur + DNV	Other injuries and conditions due to external causes	16.12	Pathologie neuro-psy	Neurologic	Exeat	1									12
RAKOTOARIMANANA Mihaja		1		25	VRP (Méd libre)	Agent de marketting	Antsahavaky	Voiture particulière	2011-11-12	1899-12-31 08:30:00	2011-11-12	1899-12-31 10:54:00	Trauma crânien /ARC	Trauma crânien bénin	Intracranial injury	16.4	Trauma crânien bénin	Trauma	Exeat	1								25
MIFIDIARISOA Martin			1	14	VRP (Méd libre)	Ecolier	Mangarivotra	Voiture particulière	2011-11-12	1899-12-31 19:30:00	2011-11-12	1899-12-31 21:00:00	Trauma/AC	Plaie des 2 genoux+contusion du poignet gauche	Open wounds of extremities	16.6.2	Simples plaies	Trauma	Exeat	1									14
MASINERA Charles Mireille		1		26	AR	Institutrice	Tsaramandroso	Voiture particulière	2011-11-12	1899-12-31 18:50:00	2011-11-12	1899-12-31 20:30:00	Perte de connaissance	Dystonie neuro-végétative	Somatoform disorders	5.15.7	Pathologie neuro-psy	Neurologic	Exeat	1								26
SIMINKITSY Aimé	1			19	AR	Etudiant	Ambondrona	Voiture particulière	2011-11-12	1899-12-31 18:40:00	2011-11-13	1899-12-31 09:00:00	Vertiges+vomissement	Intolérance médicamenteuse (Coarsucam)	allergic reactions	17.1.9	Intolérance médicamenteuse	Infectious Disease	Exeat	1							19
RAMANANANDRO Ravaka		1		24	AR	Ménagère	Tsararano ambony	Voiture particulière	2011-11-12	1899-12-31 23:00:00	2011-11-13	1899-12-31 09:00:00	Perte de connaissance	DNV chez une femme enceinte	Somatoform disorders	5.15.7	Pathologie neuro-psy	Neurologic	Exeat	1								24
RAKOTONDRABE Shelma		1		31	AR	Agent à Orange	Tsararano	Voiture particulière	2011-11-15	1899-12-31 11:00:00	2011-11-15	1899-12-31 12:25:00	Trauma/AC	Contusion simple de l'avant-bras et gros orteil droit	Superficial injury; contusion	16.8	Simple contusion	Trauma	Exeat	1								31
BAPTISTO Virginia		1		18	VRP (Méd libre)	Etudiant	Mangarivotra	Voiture particulière	2011-11-16	1899-12-31 12:00:00	2011-11-16	1899-12-31 17:00:00	Hématémèse	Suspcion de syndrome de Mallory-Weiss chez une femme enceinte	Esophageal disorders	9.4.1	Pathologie digestive	Gastrointestinal	Exeat	1								18
DESSOLTINE Josiane		1		40	AR	Ménagère	Mahavoky atsimo	Voiture particulière	2011-11-16	1899-12-31 17:45:00	2011-11-17	1899-12-31 07:30:00	Vertiges + céphalées	Dystonie neuro-végétative	Somatoform disorders	5.15.7	Pathologie neuro-psy	Neurologic	Exeat	1								40
RANDRIANARISON Monico	1			21	AR	Pêcheur	Petit plage	Voiture particulière	2011-11-18	1899-12-31 14:35:00	2011-11-18	1899-12-31 20:30:00	Morsure du pied gauche/animaux marins	Blessure du pied gauche/animaux marins	injury and poisoning	16	Morsure/animaux marins	Trauma	Exeat	1							21
RABENORO Toussaint Andrianantenaina	1			35	AR	Militaire	Androva	Voiture particulière	2011-11-22	1899-12-31 17:15:00	2011-11-22	1899-12-31 19:00:00	Trauma crânien/arme blanche	Trauma crânien bénin	Intracranial injury	16.4	Trauma crânien bénin	Trauma	Exeat	1							35
ANJARA	1			31	AR	Boulanger	Mahavoky atsimo	Voiture particulière	2011-11-22	1899-12-31 22:35:00	2011-11-22	1899-12-31	Trauma de la main/AT	Ecorchures de la main gauche	Superficial injury; contusion	16.8	Simples écorchures	Trauma	Exeat	1							31
ZAINAB		1		86	VRP (SMIM)	?	?	Voiture particulière	2011-11-24	1899-12-31 15:30:00	2011-11-24	1899-12-31 15:50:00	Nécessité d'aspiration	Insuffisance respiratoire	Respiratory failure; insufficiency; arrest (adult)	8.6	Pathologie respiratoire	Pulmonary	Exeat	1								86
RALAIVAO Jean Désiré	1			38	AR	Décorateur	Ambondrona	Voiture particulière	2011-11-25	1899-12-31 13:35:00	2011-11-26	1899-12-31 08:00:00	Trauma crânio-facial/AC	Trauma crânio-facial bénin	Intracranial injury	16.4	Trauma crânio-facial bénin	Trauma	Exeat	1							38
BAOMANANJARA		1		28	AR	Vendeur	Aranta	Voiture particulière	2011-11-26	1899-12-31 12:16:00	2011-11-26	1899-12-31 14:20:00	Trauma crânien/AC	Trauma crânien bénin	Intracranial injury	16.4	Trauma crânien bénin	Trauma	Exeat	1								28
VELOMORA Hermann	1			23	AR	Maçon	Tsararano ambony	Voiture particulière	2011-11-26	1899-12-31 23:35:00	2011-11-27	1899-12-31 08:30:00	Trauma crânien/arme blanche	Plaie pariétale gauche	Open wounds of head; neck; and trunk	16.6.1	Trauma crânien bénin	Trauma	Exeat	1							23
VOAHANGIARIVELO Sonia Niokye	1			22	AR	Ménagère	Mahatsinjo	Voiture particulière	2011-11-27	1899-12-31 07:30:00	2011-11-27	1899-12-31 20:00:00	Douleur abdominale+diarrhées+vomissement	Fièvre typhoïde (+)	Other gram negative septicemia	1.1.2.4	Pathologie infectieuse	Infectious Disease	Exeat	1							22
THERESE		1		37	AR	?	Mahavoky atsimo	Voiture particulière	2011-11-28	1899-12-31 08:40:00	2011-11-29	1899-12-31 08:00:00	Trauma/AC	DNV + Trauma crânien bénin	Somatoform disorders	5.15.7	Trauma crânien bénin	Trauma	Exeat	1								37
CHRISTOPHE Jimmy Cliff	1			26	AR	Mécanicien	Tsararano	Voiture particulière	2011-11-29	1899-12-31 11:11:00	2011-11-29	1899-12-31 14:30:00	Trauma/AT	Contusion thoracique	Superficial injury; contusion	16.8	Simple contusion	Trauma	Exeat	1							26
ANITA Mahe,re		1		23	AR	Ménagère	Majunga be	Voiture particulière	2011-11-29	1899-12-31 14:25:00	2011-11-29	1899-12-31 20:00:00	TS/anti-histaminique	IMV/anti-histaminique	Poisoning by other medications and drugs	16.11.2	Toxicologie	Intoxication	Exeat	1								23
ANDRIAMIHARIMALALA Tokiniaina	1			26	AR	Superviseur de crédit	Antanimalandy	Voiture particulière	2011-11-30	1899-12-31 15:30:00	2011-11-30	1899-12-31 19:00:00	Trauma/AC	Ecorchures+entorse de la cheville gauche	Superficial injury; contusion	16.8	Trauma membre inférieur	Trauma	Exeat	1							26
EMILIENNE			1	3	AR		Aranta	Voiture particulière	2011-12-02	1899-12-31 14:50:00	2011-12-03	1899-12-31 07:00:00	Noyade dans l'eau de mer	Bronchite aiguë par noyade	Acute bronchitis	8.1.4	Noyade	Pulmonary	Exeat	1									3
SAILAMBO Holine		1		48	AR	Vendeur	Aranta	Voiture particulière	2011-12-03	1899-12-31 21:30:00	2011-12-03	1899-12-31 21:45:00	Trauma/AC	Poussée hypertensive post-traumatique+contusions multiples	Hypertension with complications and secondary hypertension	7.1.2	Simple contusion	Trauma	Exeat	1								48
VELONATOTRA Doxie		1		33	AR	Ménagère	Aranta	Voiture particulière	2011-12-03	1899-12-31 21:30:00	2011-12-04	1899-12-31 08:00:00	Trauma/ARC	DNV + simple contusion	Somatoform disorders	5.15.7	Simple contusion	Trauma	Exeat	1								33
RANDRIANANTENAINA Rolland Daniel	1			45	VRP (Méd libre)	Chauffeur	Tsararano ambony	Voiture particulière	2011-12-04	1899-12-31 13:50:00	2011-12-06	1899-12-31 01:00:00	Vertiges + arhtralgie + fièvre	Syndrome typho-palustre	Other gram negative septicemia	1.1.2.4	Pathologie infectieuse	Infectious Disease	Exeat	1							45
RAKOTONDRAZANAJATOVO Jean Yves	1			32	VRP (Méd libre)	Commerçant	Manjarisoa	Voiture particulière	2011-12-06	1900-01-01 03:36:00	2011-12-06	1899-12-31 21:25:00	Allergie	Intolérance médicamenteuse (Ceftriaxone)	allergic reactions	17.1.9	Intolérance médicamenteuse	Infectious Disease	Exeat	1							32
RAMPANANIRINA Clément	1			48	AR	Ouvrier	Namakia	Voiture particulière	2011-12-06	1899-12-31 06:35:00	2011-12-07	1899-12-31 17:00:00	Coma	Intoxication métabolique (Overdose?)	Poisoning	16.11	Pathologie métabolique	Endocrine	Exeat	1							48
RAMAMONJISOA Ramarolahy Ravo		1		32	VRP (Méd libre)	Ménagère	Tsaramandroso	Voiture particulière	2011-12-09	1899-12-31 19:30:00	2011-12-10	1899-12-31 07:40:00	Douleur abdominale intense épigastrique et lombaire gauche	Colique néphrétique + aérocolie	Calculus of urinary tract	10.1.5	Pathologie urologique	Urologic	Exeat	1								32
DIMITRI Hadji Madi	1			26	AR	Pointeur	Tanambao Sotema	Voiture particulière	2011-12-11	1899-12-31 08:50:00	2011-12-11	1899-12-31 10:30:00	Trauma/AC	Contusion de l'avan-bras gauche + ecchymose du genou gauche	Superficial injury; contusion	16.8	Simple contusion	Trauma	Exeat	1							26
RAMINOTSARA Théos	1			49	AR	Pasteur	Manaratsandry	Voiture particulière	2011-12-11	1899-12-31 04:20:00	2011-12-11	1899-12-31 06:00:00	Perte de connaissance	Dystonie neuro-végétative	Somatoform disorders	5.15.7	Pathologie neuro-psy	Neurologic	Exeat	1							49
FANOMEZANTSOA Benjanahary Hery	1			50	AR	Responsable commerce HATIM	Mahavoky atsimo	Voiture particulière	2011-12-12	1899-12-31 08:45:00	2011-12-12	1899-12-31 12:10:00	Trauma/AC	Entorse bénigne de la cheville droite + écorchure de l'avant-bras droit	Sprains and strains	16.7	Trauma membre inférieur	Trauma	Exeat	1							50
DAMA Souf Berthin	1			49	AR	Pompier	Mahavoky avaratra	Voiture particulière	2011-12-12	1899-12-31 13:20:00	2011-12-12	1899-12-31 14:00:00	Douleur au niveau de la cheville et genou droite	Dyspnée d'effort+goutte+HTA	Painful respiration	8.8.2	Pathologie cardio-vasculaire	Cardiovascular	Exeat	1							49
RAJAONA Mamitiana	1			30	AR	Barman	La Corniche	Voiture particulière	2011-12-15	1899-12-31 02:15:00	2011-12-15	1899-12-31 08:00:00	Trauma multiple/AC	Multiples écorchures	Superficial injury; contusion	16.8	Multiples écorchures	Trauma	Exeat	1							30
HERINIAINA Augustine			1	8	VR (CSB Mahabibo)	Ecolier	Tsararano	Voiture particulière	2011-12-15	1899-12-31 15:49:00	2011-12-16	1899-12-31 08:00:00	Trauma crânien/AS	Plaie frontale profonde + PCI	Open wounds of head; neck; and trunk	16.6.1	TCE grave	Trauma	Exeat	1									8
RAZANAKINIAINA Olga	1			56	AR	DSI	Androva	Voiture particulière	2011-12-15	1899-12-31 07:00:00	2011-12-16	1899-12-31 18:30:00	Vertiges+++	Vertiges + Hypercholestérolémie	Conditions associated with dizziness or vertigo	6.8.2	Pathologie cardio-vasculaire	Cardiovascular	Exeat	1							56
RAKOTONARIVO Martial	1			16	AR	Cuisinier	Ampasika	Voiture particulière	2011-12-16	1899-12-31 22:15:00	2011-12-16	1899-12-31 06:30:00	Crises convulsives	Asthénie physique	malaise and fatigue	17.1.8	Pathologie neuro-psy	Neurologic	Exeat	1							16
TANANTSOA Laitana	1			20	VRP (Disp JIRAMA)	Livreur de lait	?	Voiture particulière	2011-12-19	1899-12-31 19:50:00	2011-12-19	1899-12-31 12:00:00	Trauma/AC	Contusion du gros orteil droit	Superficial injury; contusion	16.8	Simple contusion	Trauma	Exeat	1							20
ASMINA		1		15	VR (SOS Médecins)	Ecolier	Ambalavola	Voiture particulière	2011-12-22	1899-12-31 12:20:00	2011-12-22	1899-12-31 20:10:00	TS/Paracétamol	IMV/Paracétamol	Poisoning by other medications and drugs	16.11.2	Toxicologie	Intoxication	Exeat	1								15
FITANAMILA	1			70	AR		Hospice Majunga be	Voiture particulière	2011-12-22	1899-12-31 19:00:00	2011-12-29	1899-12-31 11:00:00	AEG	Malnutrition + sénilité	Unspecified protein-calorie malnutrition	3.5.1	Pathologie métabolique	Endocrine	Exeat	1							70
ANDRIAMAMPANDRY Haja	1			32	AR	Agent AQUALMA	Tsaramandroso	Voiture particulière	2011-12-23	1899-12-31 22:30:00	2011-12-23	1899-12-31 23:15:00	Trauma/AC	Trauma unguéal des 3e et 4e doigts de la main gauche	injury and poisoning	16	Trauma de la main	Trauma	Exeat	1							32
SOAZY		1		?	AR	?	?	Voiture particulière	2011-12-25	1899-12-31 07:05:00	2011-12-25	1899-12-31 12:00:00	Coma éthylique	Coma éthylique	Alcohol-related disorders	5.11	Toxicologie	Intoxication	Exeat	1								?
RAHERINANDRASANA Jean Armel	1			20	AR	Séminariste	Antanimasaja	Voiture particulière	2011-12-26	1899-12-31 19:30:00	2011-12-27	1899-12-31 08:00:00	Douleur abdominale aiguë	Suspicion de colique méphrétique	calculus of kidney	10.1.5.1	Pathologie urologique	Urologic	Exeat	1							20
RAZANADRAKOTO Andriantsilavina Onisoa	1			18	AR	?	Androva	Voiture particulière	2011-12-30	1899-12-31 20:35:00	2011-12-31	1899-12-31 09:00:00	Trauma/AC	Plaie temporale gauche + multiples écorchures	Open wounds of head; neck; and trunk	16.6.1	Trauma crânien bénin	Trauma	Exeat	1							18
CYNTHIA Delphine		1		15	VRP (Méd libre)	Ecolier	Namakia	Vedette	2011-06-02	1899-12-31 08:45:00	2011-06-02	1899-12-31 13:30:00	Douleur abdominale aiguë	Colopathie fonctionnelle	Lower gastrointestinal disorders	9.6	Pathologie digestive	Gastrointestinal	Exeat	1								15
RAZAFINDRATSARA Colette		1		62	AR	Médecin	Tsaramandroso	Tsaramandroso	2011-07-31	1899-12-31 16:45:00	2011-08-01	1899-12-31 08:10:00	Nausées + vertiges	Poussée hypertensive	Hypertension with complications and secondary hypertension	7.1.2	Pathologie cardio-vasculaire	Cardiovascular	Exeat	1								62
RALAIAVY Eric	1			25	VR (CSB Boanamary)	Cultivateur	Boanamary	Taxi-brousse	2011-01-01	1899-12-31 06:10:00	2011-01-02	1899-12-31 08:00:00	Plaie de la lèvre inférieure/ARC	Plaie labiale et contusion malaire droite	Open wounds of extremities	16.6.2	Trauma facial/ARC	Trauma	Exeat	1							25
RAKOTONDRAZA Yvonne Odette		1		56	VR (CSB Andranofasika)	Instituteur	Antananarivo	Taxi-brousse	2011-02-11	1899-12-31 07:45:00	2011-02-11	1899-12-31 19:00:00	Trauma thoracique/AC	Contusion thoracique bénigne	Superficial injury; contusion	16.8	Trauma thoracique bénin	Trauma	Exeat	1								56
TSIRISE	1			73	AR	Cultivateur	Katsepy	Taxi-brousse	2011-03-03	1899-12-31 12:00:00	2011-03-04	1899-12-31 08:00:00	Trauma/ARC	Trauma facial /Arc	injury and poisoning	16	Trauma facial	Trauma	Exeat	1							73
RAKOTOARIMANANA Hajanirina Olivier	1			19	AR	?	Ambalanomby	Taxi-brousse	2011-03-17	1899-12-31 21:30:00	2011-03-18	1899-12-31 08:00:00	Trauma thoracique et du pied G AC	Entorse du pied gauche	Sprains and strains	16.7	Trauma membre inférieur	Trauma	Exeat	1							19
RAJERIZAFY Tinasoa	1			40	AR	?	Ambalanomby	Taxi-brousse	2011-03-17	1899-12-31 21:30:00	2011-03-18	1899-12-31 08:00:00	Trauma thoracique /AC	Contusion thoracique	Superficial injury; contusion	16.8	Trauma thoracique bénin	Trauma	Exeat	1							40
RAVELOSOA Justine		1		39	AR	?	Ambalanomby	Taxi-brousse	2011-03-17	1899-12-31 21:30:00	2011-03-18	1899-12-31 08:00:00	Trauma thoracique /AC	Contusion thoracique	Superficial injury; contusion	16.8	Trauma thoracique bénin	Trauma	Exeat	1								39
RAKOTOMALALA Alain	1			51	AR	Electronicien	Antanimasaja	Taxi-brousse	2011-04-02	1899-12-31 04:30:00	2011-04-02	1899-12-31 05:00:00	Trauma /AC	Traumatisme du pyramide nasal	injury and poisoning	16	Trauma ORLO	Trauma	Exeat	1							51
EDDY Emile	1			18	AR	Mpanera	Ambondromamy	Taxi-brousse	2011-04-02	1899-12-31 04:45:00	2011-04-02	?	Trauma /AC	Plaie traumatique du nez et du pied G	Open wounds of head; neck; and trunk	16.6.1	Multiples plaies	Trauma	Exeat	1							18
ZOEPANAHY	1			22	AR	Vendeur	Diego Suarez	Taxi-brousse	2011-04-02	1899-12-31 04:30:00	2011-04-02	1899-12-31 12:00:00	Trauma /AC	Plaie superficielle sous-mentonnière+écorchures de la face et jambe droite	Open wounds of head; neck; and trunk	16.6.1	Trauma facial bénin	Trauma	Exeat	1							22
RANDRIAMBOLA Makapi	1			31	AR	Chauffeur	Tsararano ambany	Taxi-brousse	2011-04-02	1899-12-31 04:30:00	2011-04-02	1899-12-31 11:00:00	Trauma /AC	Plaie de la paupière supérieure + écorchure de la face externe du genou G	Open wounds of head; neck; and trunk	16.6.1	Trauma facial bénin	Trauma	Exeat	1							31
BOAVY Angel	1			42	AR	Ménagère	Amborovy	Taxi-brousse	2011-04-02	1899-12-31 04:30:00	2011-04-02	?	Trauma /AC	Plaie du pied gauche	Open wounds of extremities	16.6.2	Trauma membre inférieur	Trauma	Exeat	1							42
TSITERY	1			45	AR	Cultivateur	Sotema	Taxi-brousse	2011-04-02	1899-12-31 04:30:00	2011-04-02	1899-12-31 09:30:00	Trauma /AC	Plaie délabréede la cuisse gauche	Open wounds of extremities	16.6.2	Trauma membre inférieur	Trauma	Exeat	1							45
DAVIDA	1			22	AR	?	Amborovy	Taxi-brousse	2011-04-02	1899-12-31 04:30:00	2011-04-03	1899-12-31 10:00:00	Trauma /AC	Plaie superficielle de la lèvre supérieure	Open wounds of head; neck; and trunk	16.6.1	Trauma facial bénin	Trauma	Exeat	1							22
TOLOTRINIAVO Aina			1	2	VRP (Méd libre)	?	Marovoay	Taxi-brousse	2011-04-12	1899-12-31 16:40:00	2011-04-12	1899-12-31 18:00:00	Trauma MIG/chute (AD)	Contusion de la hanche G	Superficial injury; contusion	16.8	Simple contusion	Trauma	Exeat	1									2
RAZAFINDRAKOTO Ernest	1			33	VR (CHD Marovoay)	Cultivateur	Marovoay	Taxi-brousse	2011-05-20	1899-12-31 21:30:00	2011-05-21	1899-12-31 09:30:00	Trauma crânio-facial/ARC	Contusion crânio-facial/ARC	Superficial injury; contusion	16.8	Simple contusion	Trauma	Exeat	1							33
MAMY	1			23	VR (CHD Marovoay)	?	Marovoay	Taxi-brousse	2011-06-26	1899-12-31 11:30:00	2011-06-26	1899-12-31 18:00:00	Trauma facial/ARC	Contusion+écorchures del'hémiface droite/ARC	Superficial injury; contusion	16.8	Trauma facial bénin	Trauma	Exeat	1							23
VOAHANGY		1		39	AR	Ménagère	Antananarivo	Taxi-brousse	2011-07-10	1899-12-31 01:05:00	2011-07-10	1899-12-31 06:00:00	Trauma facial/AC	Plaie péri-orbitaire gauche	Open wounds of head; neck; and trunk	16.6.1	Trauma facial	Trauma	Exeat	1								39
TSIAVALA Georgio Carlos	1			28	AR	Artisan	Tsaramandroso	Taxi-brousse	2011-07-10	1899-12-31 00:30:00	2011-07-10	1899-12-31 02:00:00	Trauma/AC	Plaie profonde de la jambe gauche	Open wounds of extremities	16.6.2	Trauma membre inférieur	Trauma	Exeat	1							28
RANDRIA	1			28	AR	Commerçant	Mahajamba	Taxi-brousse	2011-07-12	1899-12-31 14:20:00	2011-07-12	1899-12-31 21:00:00	Trauma crânien /AC	Plaie pariétale + contusion du coude	Open wounds of head; neck; and trunk	16.6.1	Trauma crânien bénin	Trauma	Exeat	1							28
DESIRE	1			23	VR (CSB Boanamary)	Cultivateur	Boanamary	Taxi-brousse	2011-07-20	1899-12-31 10:30:00	2011-07-20	1899-12-31 13:00:00	Douluer lombaire et thoracique/ARC	Douleur thoraco-lombaire/ARC	Lumbago	13.3.3.3	Simple contusion	Trauma	Exeat	1							23
AVITSARA		1		49	AR	Cultivateur	Amboromalandy	Taxi-brousse	2011-08-05	1899-12-31 08:30:00	2011-05-06	1899-12-31 08:00:00	Trauma thoracique/coups et blessures volontaires	Contusion thoraco-abdominale	Superficial injury; contusion	16.8	Simple contusion	Trauma	Exeat	1								49
ZAFINDRAZAY Georgine		1		32	AR	Ménagère	Fiofio	Taxi-brousse	2011-08-05	1899-12-31 20:15:00	2011-08-05	1899-12-31 21:00:00	Trauma crânien/ AC	Ecorchures multiples	Superficial injury; contusion	16.8	Multiples écorchures	Trauma	Exeat	1								32
FIDIMANANA	1			40	AR	?	Mahajamba	Taxi-brousse	2011-08-05	1899-12-31 15:48:00	2011-08-06	1899-12-31 08:30:00	Trauma/chute	Syndrome d''UGD	gastroduodenal ulcer (except hemorrhage)	9.4.2	Pathologie digestive	Gastrointestinal	Exeat	1							40
BOTOLAMBO Félix	1			60	VRP (Soctam)	Comptable	Ambatoboeni	Taxi-brousse	2011-08-14	1899-12-31 11:30:00	2011-08-15	1899-12-31 08:00:00	Syndrome occlusif	Subocclusion fonctionnelle	Other intestinal obstruction	9.6.3.4	Pathologie digestive	Gastrointestinal	Exeat	1							60
RASOANANTENAINA Vololonindriana		1		44	AR	Trésorier	Andranofasika	Taxi-brousse	2011-08-25	1899-12-31 08:00:00	2011-08-25	1899-12-31 10:00:00	Trauma/AC	Contusion thoracique	Superficial injury; contusion	16.8	Simple contusion	Trauma	Exeat	1								44
TAVISON Andriamitany	1			15	VRP (Méd libre)	Ecolier	Ambatoboeni	Taxi-brousse	2011-08-27	1899-12-31 07:50:00	2011-08-27	1899-12-31 09:00:00	Plaie dorsale / arme blanche	Plaie sous-scapulaire droite	Open wounds of head; neck; and trunk	16.6.1	Trauma thoracique	Trauma	Exeat	1							15
RANIRIARISON Ruffin	1			49	AR	Régisseur	Antananarivo	Taxi-brousse	2011-09-02	1899-12-31 09:00:00	2011-09-02	1899-12-31 10:30:00	Trauma de l'épaule G/AC	Entorse de l'articulation acvromio-claviculaire	Sprains and strains	16.7	Trauma membre supérieur	Trauma	Exeat	1							49
RABENORISOA Hermann	1			20	AR	Vendeur	Antananarivo	Taxi-brousse	2011-09-02	1899-12-31 09:00:00	2011-09-02	1899-12-31 20:30:00	Trauma/AC	Ecchymose de la face externe de la cuisse gauche	Superficial injury; contusion	16.8	Trauma membre inférieur	Trauma	Exeat	1							20
RAZANATSOA Léontine		1		46	AR	Religieuse	Tuléar	Taxi-brousse	2011-09-02	1899-12-31 09:00:00	2011-09-02	1899-12-31 10:30:00	Trauma/AC	Ecchymose de la face antérieure du bras gauche + contusion frontale	Superficial injury; contusion	16.8	Trauma facial	Trauma	Exeat	1								46
RANDRIAMIHARISOA Faramalala		1		24	AR	Ingénieur agronome	Antananarivo	Taxi-brousse	2011-09-02	1899-12-31 09:00:00	2011-09-02	1899-12-31 20:30:00	Trauma/AC	Ecchymose de la face antérieure de la jambe gauche	Superficial injury; contusion	16.8	Trauma membre inférieur	Trauma	Exeat	1								24
FALIMALALA Nirina		1		16	AR	Vendeur	Ambovondramanesy	Taxi-brousse	2011-09-11	1899-12-31 11:30:00	2011-09-11	1899-12-31 18:00:00	Trauma crânien/ARC	Plaie pariétale gauche	Open wounds of head; neck; and trunk	16.6.1	Trauma crânien bénin	Trauma	Exeat	1								16
RAHERIMANANA Berson	1			20	AR	?	?	Taxi-brousse	2011-09-13	1899-12-31 09:30:00	2011-09-13	?	Trauma/AC collectif	Trauma facial + hématome frontal droit	injury and poisoning	16	Trauma maxillo-facial	Trauma	Exeat	1							20
PIERANIAINA Patrick	1			35	CSB Ambondromamy	Menuisier	Bealanana	Taxi-brousse	2011-09-13	1899-12-31 09:30:00	2011-09-13	1899-12-31 18:00:00	Trauma/AC collectif	Plaies multiples	Open wounds	16.6	Multiples plaies	Trauma	Exeat	1							35
STADELLE	1			22	AR	?	?	Taxi-brousse	2011-09-13	1899-12-31 09:30:00	2011-09-13	?	Trauma/AC collectif	Ecchymose péri-orbitaire+contusions	Superficial injury; contusion	16.8	Trauma facial	Trauma	Exeat	1							22
JERRY Lemena Clément Vintsy			1	12	AR	?	?	Taxi-brousse	2011-09-13	1899-12-31 09:30:00	2011-09-13	?	Trauma/AC collectif	Ecchymose de L'œil droit	Superficial injury; contusion	16.8	Trauma facial	Trauma	Exeat	1									12
HENRIETTE Adeline		1		42	CSB Ambondromamy	?	?	Taxi-brousse	2011-09-13	1899-12-31 09:30:00	2011-09-13	?	Trauma/AC collectif	Contusion du dos de la main droite	Superficial injury; contusion	16.8	Trauma de la main	Trauma	Exeat	1								42
MARIJARY		1		50	CSB Ambondromamy	?	?	Taxi-brousse	2011-09-13	1899-12-31 09:30:00	2011-09-13	?	Trauma/AC collectif	Contusion cervicale et abdominale	Superficial injury; contusion	16.8	Simple contusion	Trauma	Exeat	1								50
SOLOFO Edson Belarme	1			29	CSB Ambondromamy	?	?	Taxi-brousse	2011-09-13	1899-12-31 09:30:00	2011-09-13	?	Trauma/AC collectif	Bosse frontale droite	Superficial injury; contusion	16.8	Trauma crânien bénin	Trauma	Exeat	1							29
JUNA		1		28	CSB Ambondromamy	?	?	Taxi-brousse	2011-09-13	1899-12-31 09:30:00	2011-09-13	?	Trauma/AC collectif	Plaie sus-orbitaire gauche	Open wounds of head; neck; and trunk	16.6.1	Trauma facial	Trauma	Exeat	1								28
RABENANTENAINA Justin	1			28	CSB Ambondromamy	?	?	Taxi-brousse	2011-09-13	1899-12-31 09:30:00	2011-09-13	1899-12-31 11:45:00	Trauma/AC collectif	Plaie fronto-pariétale droite	Open wounds of head; neck; and trunk	16.6.1	Trauma crânien bénin	Trauma	Exeat	1							28
RAHARIMANANA Rija William	1			21	CSB Ambondromamy	Etudiant	Antsohihy	Taxi-brousse	2011-09-13	1899-12-31 09:30:00	2011-09-13	?	Trauma/AC collectif	Plaie frontale + contusions multiples	Open wounds of head; neck; and trunk	16.6.1	Multiples plaies	Trauma	Exeat	1							21
RABEVANDRANTO Célestin	1			42	VR (CSB Bekobay)	?	Bekobay	Taxi-brousse	2011-09-13	1899-12-31 09:30:00	2011-09-13	1899-12-31 02:10:00	Trauma/AC collectif	Plaie frontale	Open wounds of head; neck; and trunk	16.6.1	Trauma crânien bénin	Trauma	Exeat	1							42
SUZANNELLE Raymonde		1		24	AR	?	?	Taxi-brousse	2011-09-13	1899-12-31 09:30:00	2011-09-13	?	Trauma/AC collectif	Plaie de l'angle externe de l'œil droit	Open wounds of head; neck; and trunk	16.6.1	Trauma facial	Trauma	Exeat	1								24
BENOARA Henry	1			63	CSB Ambondromamy	?	?	Taxi-brousse	2011-09-13	1899-12-31 09:30:00	2011-09-13	?	Trauma/AC collectif	Trauma facial+plaie de la pommette gauche	Open wounds of extremities	16.6.2	Trauma facial	Trauma	Exeat	1							63
RABEVAZAHA Willy Patrick	1			25	CSB Ambondromamy	?	?	Taxi-brousse	2011-09-13	1899-12-31 09:30:00	2011-09-13	?	Trauma/AC collectif	Plaie délabrée de la main et ecchymose de l'œil droit	Open wounds of extremities	16.6.2	Trauma facial	Trauma	Exeat	1							25
SUZANNA Raymonde		1		33	AR	?	?	Taxi-brousse	2011-09-13	1899-12-31 09:30:00	2011-09-13	?	Trauma/AC collectif	Plaie de la pommette droite	Open wounds of extremities	16.6.2	Trauma facial	Trauma	Exeat	1								33
VINCENT	1			43	CSB Ambondromamy	?	?	Taxi-brousse	2011-09-13	1899-12-31 09:30:00	2011-09-13	1899-12-31 14:45:00	Trauma/AC collectif	Plaie de la joue + Contusion de l'épaule gauche	Open wounds of extremities	16.6.2	Simple contusion	Trauma	Exeat	1							43
ANGELIO Tarasy	1			23	AR	?	?	Taxi-brousse	2011-09-13	1899-12-31 09:30:00	2011-09-13	?	Trauma/AC collectif	Tuméfaction de la pyramide nasale	Cancer of head and neck	2.11.1	Trauma facial	Trauma	Exeat	1							23
MIARIVONY Bavony		1		43	VR (CSB Bekobay)	Fermière	Besakoa	Taxi-brousse	2011-09-13	1899-12-31 09:30:00	2011-09-14	1899-12-31 02:10:00	Trauma/AC collectif	Contusion lombaire	Superficial injury; contusion	16.8	Simple contusion	Trauma	Exeat	1								43
LAUREAT		1		17	AR	Ménagère	Mahajamba	Taxi-brousse	2011-09-13	1899-12-31 09:30:00	2011-09-14	1899-12-31 02:10:00	Trauma/AC collectif	Contusion frontale	Superficial injury; contusion	16.8	Simple contusion	Trauma	Exeat	1								17
ANITA		1		36	VR (CHD Ambatoboeni)	Nomade/religion	SDF	Taxi-brousse	2011-09-19	1899-12-31 05:00:00	2011-09-19	1899-12-31 07:00:00	Trauma/ARC	Plaies superficielles multiples	Open wounds	16.6	Plaie simple	Trauma	Exeat	1								36
ZARALENE		1		50	VR (CHD Ambatoboeni)	Nomade/religion	SDF	Taxi-brousse	2011-09-19	1899-12-31 05:00:00	2011-09-19	1899-12-31 07:00:00	Trauma/ARC	Simple plaie faciale	Superficial injury; contusion	16.8	Plaie simple	Trauma	Exeat	1								50
MICHELINE		1		24	VR (CHD Ambatoboeni)	Nomade/religion	SDF	Taxi-brousse	2011-09-19	1899-12-31 05:00:00	2011-09-19	1899-12-31 07:00:00	Trauma/ARC	Plaie temporale gauche+ecchymose frontale gauche	Open wounds of head; neck; and trunk	16.6.1	Trauma crânien bénin	Trauma	Exeat	1								24
MEVADERA		1		42	VR (CHD Ambatoboeni)	Nomade/religion	SDF	Taxi-brousse	2011-09-19	1899-12-31 05:00:00	2011-09-19	1899-12-31 07:00:00	Trauma/ARC	Plaie temporale gauche et lèvre supérieure	Open wounds of head; neck; and trunk	16.6.1	Trauma crânio-facial	Trauma	Exeat	1								42
LAHADY ZARALINE		1		50	VR (CHD Ambatoboeni)	Nomade/religion	SDF	Taxi-brousse	2011-09-19	1899-12-31 05:00:00	2011-09-19	1899-12-31 07:00:00	Trauma/ARC	Plaie temporale droite+contusion membre inférieur droit	Open wounds of head; neck; and trunk	16.6.1	Trauma crânien bénin	Trauma	Exeat	1								50
VELOMARO	1			40	VR (CHD Ambatoboeni)	Nomade/religion	SDF	Taxi-brousse	2011-09-19	1899-12-31 05:00:00	2011-09-19	1899-12-31 07:00:00	Trauma/ARC	Plaie temporale droite	Open wounds of head; neck; and trunk	16.6.1	Trauma crânien bénin	Trauma	Exeat	1							40
NORIS	1			17	VR (CHD Ambatoboeni)	Nomade/religion	SDF	Taxi-brousse	2011-09-19	1899-12-31 05:00:00	2011-09-19	1899-12-31 07:00:00	Trauma/ARC	Plaie palpébrale droite superficielle	Open wounds of head; neck; and trunk	16.6.1	Trauma facial	Trauma	Exeat	1							17
FRELA	1			17	VR (CHD Ambatoboeni)	Nomade/religion	SDF	Taxi-brousse	2011-09-19	1899-12-31 05:00:00	2011-09-19	1899-12-31 07:00:00	Trauma/ARC	Plaie fronto-occipitale	Open wounds of head; neck; and trunk	16.6.1	Trauma crânien bénin	Trauma	Exeat	1							17
EDOUARD	1			52	VR (CHD Ambatoboeni)	Nomade/religion	SDF	Taxi-brousse	2011-09-19	1899-12-31 05:00:00	2011-09-19	1899-12-31 07:00:00	Trauma/ARC	Plaie frontale et nasale	Open wounds of head; neck; and trunk	16.6.1	Trauma crânio-facial	Trauma	Exeat	1							52
RAKOTOARISON Hajatiana Antoine			1	4	VRP (Méd libre)	?	Ambatoboeny	Taxi-brousse	2011-10-08	1899-12-31 09:00:00	2011-10-08	1899-12-31 13:00:00	Trauma/AC	Trauma crânien +NPCI	Intracranial injury	16.4	Trauma crânien	Trauma	Exeat	1									4
RABABANY Jean	1			21	VR (CHR Marovoay)	Etudiant	Marovoay	Taxi-brousse	2011-10-20	1899-12-31 21:56:00	2011-10-21	1899-12-31 11:00:00	Trauma/AC	Contusion simple de la cuisse droite	Superficial injury; contusion	16.8	Simple contusion	Trauma	Exeat	1							21
RAMBININTSOA Patrice	1			39	AR	Chauffeur	Androva	Taxi-brousse	2011-10-23	1899-12-31 13:50:00	2011-10-23	1899-12-31 16:30:00	Trauma de l'œil droit/ARC	Trauma crânio-facial bénin	Intracranial injury	16.4	Trauma crânio-facial bénin	Trauma	Exeat	1							39
TREFINDRAZANA Gérald	1			34	VR (CSB Mitsinjp)	Cultivateur	Mitsinjo	Taxi-brousse	2011-11-21	1899-12-31 10:30:00	2011-11-22	1899-12-31 07:00:00	Trauma crânien/ARC	Plaie au niveau de la nuque	Open wounds of head; neck; and trunk	16.6.1	Trauma cervical	Trauma	Exeat	1							34
BORODO	1			29	VRP (Inf prison)	Détenu (cultivateur)	Manerinerina	Taxi-brousse	2011-12-18	1899-12-31 07:57:00	2011-12-18	1899-12-31 10:00:00	Trauma/ARC	Plaie frontale+multiples écorchures	Open wounds of head; neck; and trunk	16.6.1	Trauma crânien bénin	Trauma	Exeat	1							29
RANDRIATSIRESY Solofo	1			36	AR	Electricien	Tsararano ambony	Taxi	2011-01-01	1899-12-31 16:20:00	2011-01-01	1899-12-31 18:30:00	Perte de connaissance	Coma éthylique	Alcohol-related disorders	5.11	Toxicologie	Intoxication	Exeat	1							36
VONINANDRO Delhia		1		22	VRP (Osiem)	?	Sotema	Taxi	2011-01-01	1899-12-31 08:50:00	2011-01-01	1899-12-31 12:30:00	Intoxication médicamenteuse	IMV pluri médicamenteux	Poisoning by other medications and drugs	16.11.2	Toxicologie	Intoxication	Exeat	1								22
NJARINY		1		43	VR (CSB Sotema)	Ménagère	Tanambao Sotema	Taxi	2011-01-02	1899-12-31 17:30:00	2011-01-03	1899-12-31 06:45:00	Obnibulation +hyperthermie	Hypoglycémie	Endocrine; nutritional; and metabolic diseases and immunity disorders	3	Patho métabolique	Endocrine	Exeat	1								43
RANDRIANTAHIANA Ferdinand	1			21	AR	Vendeur	Marovoay	Taxi	2011-01-04	1899-12-31 00:46:00	2011-01-04	1899-12-31 02:00:00	Trauma crânio-facial/AC	Trauma crânio-facial bénin/AC	Intracranial injury	16.4	Trauma crânio-facial bénin	Trauma	Exeat	1							21
IARISENTONIAINA Felanirina Sandra		1		20	VRP(SOS Méd)	Ecolier	Manjarisoa	Taxi	2011-01-04	1899-12-31 20:00:00	2011-01-05	1899-12-31 09:00:00	TS/ médicaments méconnus	TS/ médicaments méconnus	Poisoning by other medications and drugs	16.11.2	Toxicologie	Intoxication	Exeat	1								20
TEVANIAINA Zoëline		1		15	AR	Ecolier	Mahavoky atsimo	Taxi	2011-01-04	1899-12-31 11:30:00	2011-01-05	1899-12-31 10:10:00	TS pluri-médicamenteuse (Paracetamol, AINS, mebendazole tétra)	IMV pluri médicamenteux	Poisoning by other medications and drugs	16.11.2	Toxicologie	Intoxication	Exeat	1								15
MARIE Hélène Claudette Vanessa		1		16	AR	Femme de ménage	Mahavoky Nord	Taxi	2011-01-04	1899-12-31 12:45:00	2011-01-05	1899-12-31 08:30:00	TS /raticide	TS /raticide	poisoning by nonmedicinal substances	16.11.3	Toxicologie	Intoxication	Exeat	1								16
NDAHOMA Mouhamadi Abdallah	1			40	VRP (SOS Méd)	Chef de chantier	Mayotte	Taxi	2011-01-05	1899-12-31 07:30:00	2011-01-05	1899-12-31 14:45:00	Colique abdominale+diarrhées	Intoxication alimentaire	intestinal infection	9.1	Infection digestive	Infectious Disease	Exeat	1							40
ALEXANDRE Fabrinah		1		16	AR	Ménagère	Marolaka	Taxi	2011-01-05	1899-12-31 04:35:00	2011-01-05	1899-12-31 12:30:00	TS/lexomil cp	TS/lexomil cp	poisoning by nonmedicinal substances	16.11.3	Toxicologie	Intoxication	Exeat	1								16
RAKOTONIJAHARIVELO Mamitiana	1			26	VR(CSB Mahavoky)	Vendeur	Mahavoky Sud	Taxi	2011-01-05	1899-12-31 21:30:00	2011-01-06	1899-12-31 08:00:00	TS/raticide	TS/raticide	poisoning by nonmedicinal substances	16.11.3	Toxicologie	Intoxication	Exeat	1							26
RAKOTOSON Vonjy Edmondine		1		28	AR	Commerçant	Fiofio	Taxi	2011-01-06	1899-12-31 16:50:00	2011-01-06	1899-12-31 17:30:00	Traumatisme/ARC	Contusions multiples	Superficial injury; contusion	16.8	Contusions multiples	Trauma	Exeat	1								28
SAKABE Bototsara Jonah	1			43	AR	Tireur de pousse-pousse	Mahavoky avaratra	Taxi	2011-01-06	1899-12-31 00:10:00	2011-01-06	1899-12-31 17:00:00	Trauma/AC	Contusion thoracique /AC	Superficial injury; contusion	16.8	Simple contusion	Trauma	Exeat	1							43
NADIA		1		17	AR	Ecolier	Tsararano ambony	Taxi	2011-01-06	1899-12-31 20:50:00	2011-01-07	1899-12-31 11:45:00	TS/pile+dissolvant	TS/pile+dissolvant	poisoning by nonmedicinal substances	16.11.3	Toxicologie	Intoxication	Exeat	1								17
RASOAMAMIZARA Tombozafy		1		22	AR	Vendeur	Tsararano ambany	Taxi	2011-01-08	1899-12-31 10:00:00	2011-01-08	1899-12-31 16:00:00	Perte de connaissance	Coma éthylique +hypoglycémie	Alcohol-related disorders	5.11	Pathologie métabolique	Endocrine	Exeat	1								22
RATSIMBAZAFY Gladys Elysé	1			24	AR	Réceptionniste	Ambalavato	Taxi	2011-01-08	1899-12-31 18:00:00	2011-01-08	1899-12-31 19:00:00	Traumatisme / ARC	Traumatisme dorso-lombaire	injury and poisoning	16	Traumatisme dorso-lombaire	Trauma	Exeat	1							24
RAKOTONIRINA Désiré	1			21	VR (CSB Sotema)	Menuisier	Tanambao Sotema	Taxi	2011-01-08	1899-12-31 11:22:00	2011-01-08	1899-12-31 14:30:00	Trauma de la main/ AT	Trauma du pouce et de l'index de la main G / AT	injury and poisoning	16	Trauma membre supérieur	Trauma	Exeat	1							21
HANTANIRINA Vololoniaina Joséphine		1		20	VR (CSB Sotema)	Ecolier	Antanimalandy	Taxi	2011-01-08	1899-12-31 03:30:00	2011-01-08	1899-12-31 06:30:00	TS /Chlorphéniramine	IMV / Chlorphéniramine	Poisoning by other medications and drugs	16.11.2	Toxicologie	Intoxication	Exeat	1								20
RAHARIMALALA Bénédicte		1		25	AR	Ménagère	Tsararano ambony	Taxi	2011-01-08	1899-12-31 09:30:00	2011-01-08	1899-12-31 19:56:00	Plaie frontale par objets tranchants (débris de bouteille)	Plaie frontale par objet tranchant (débris de bouteille) /ARC	Open wounds of head; neck; and trunk	16.6.1	Trauma crânien bénin	Trauma	Exeat	1								25
MANOLAH Pierrot	1			26	VR (CSB Mahavoky)	Foot-balleur	Mahavoky sud	Taxi	2011-01-08	1899-12-31 17:00:00	2011-01-08	1899-12-31 18:30:00	Trauma du 3e doigt de la main droite /AT	Plaie du 3e doigt de la main D / AT	Open wounds of extremities	16.6.2	Trauma membre supérieur	Trauma	Exeat	1							26
FILLIASTRE	1			35	VR (CSB Mahavoky)	Journalier	Mahavoky avaratra	Taxi	2011-01-08	1899-12-31 10:30:00	2011-01-08	1899-12-31 17:00:00	Crises convulsives 1ère épisode	Crises convulsives apyrétiques	convulsions	6.4.2	Pathologie neuro-psy	Neurologic	Exeat	1							35
MAHATOMBO Martine		1		42	AR	Commerçante	Tsararano Nosikely	Taxi	2011-01-08	1899-12-31 09:00:00	2011-01-09	1899-12-31 09:00:00	Trauma /AC	Contusion abdominale / AC	Superficial injury; contusion	16.8	Trauma abdo bénin	Trauma	Exeat	1								42
VOLOLONIAINA Rojo		1		19	AR	Vendeur	Manga	Taxi	2011-01-09	1899-12-31 00:38:00	2011-01-09	1899-12-31 08:00:00	Douleur abdo diffuse + vomissement	Colopathie fonctionnelle	Lower gastrointestinal disorders	9.6	Pathologie digestive	Gastrointestinal	Exeat	1								19
TOLOJANAHARY Francis	1			33	AR	Menuisier	Fiofio	Taxi	2011-01-09	1899-12-31 06:00:00	2011-01-09	1899-12-31 14:30:00	Trauma/arme blanche (ARC)	Plaies multiples faciale et lombaire	Open wounds of head; neck; and trunk	16.6.1	Multiples plaies	Trauma	Exeat	1							33
RAMANANTSOA Bezato	1			37	AR	Chauffeur	Ampasika	Taxi	2011-01-09	1899-12-31 15:48:00	2011-01-09	1899-12-31 23:00:00	Trauma / ARC	Plaies de l'avant-bras G /ARC	Open wounds of extremities	16.6.2	Multiples plaies	Trauma	Exeat	1							37
ROVANIRINA Andry	1			26	AR	Etudiant	Manjarisoa	Taxi	2011-01-10	1899-12-31 15:14:00	2011-01-10	1899-12-31 17:30:00	Trauma facial /AC	trauma facial bénin + épistaxis	injury and poisoning	16	Trauma facial bénin	Trauma	Exeat	1							26
RANAIVODRATSIZA Laurent	1			39	AR	Policier	Mahavoky	Taxi	2011-01-11	1899-12-31 13:20:00	2011-01-11	1899-12-31 15:30:00	Trauma /AC	Multiples écorchures	Superficial injury; contusion	16.8	Multiples écorchures	Trauma	Exeat	1							39
RAZAFINDRAIBE Ramanandroa	1			22	AR	Chômeur	Mahavoky avaratra	Taxi	2011-01-12	1899-12-31 23:50:00	2011-01-13	1899-12-31 06:20:00	TS par alcool + pile	Intoxication volontaire par pile + alcool	poisoning by nonmedicinal substances	16.11.3	Toxicologie	Intoxication	Exeat	1							22
RAZAFINDRAMANANA Jean Rodin			1	12	AR	Ecolier	Ambondrona	Taxi	2011-01-14	1899-12-31 16:25:00	2011-01-14	1899-12-31 19:00:00	Trauma /accident de charrette	Plaie endo-buccale + contusion du cou	Open wounds of head; neck; and trunk	16.6.1	Trauma facial	Trauma	Exeat	1									12
RAKOTOARISOA Malcot	1			28	AR	Coursier	Mangarivotra	Taxi	2011-01-14	1899-12-31 02:30:00	2011-01-14	1899-12-31 09:00:00	Douleur abdominale aiguë	Aérocolie	abdominal pain	17.1.7	Pathologie digestive	Gastrointestinal	Exeat	1							28
RAVOLA Anicia			1	13	AR	Collégien	Mangarivotra	Taxi	2011-01-15	1899-12-31 21:54:00	2011-01-15	1899-12-31 22:35:00	Trauma /ARC	Contusions multiples bénignes	Superficial injury; contusion	16.8	Contusions multiples bénignes	Trauma	Exeat	1									13
SHAKIRA			1	2	AR		Amboaboaka	Taxi	2011-01-15	1899-12-31 17:30:00	2011-01-15	1899-12-31 18:30:00	Trauma /AC	Plaie frontale bénigne/AC	Open wounds of head; neck; and trunk	16.6.1	Trauma crânien bénin	Trauma	Exeat	1									2
MAMINIAINA Jacqueline		1		24	AR	Chômeur	Tsararano	Taxi	2011-01-16	1899-12-31 23:45:00	2011-01-17	1899-12-31 01:40:00	Trauma crânien /AC	Plaie frontale superficielle/AC	Open wounds of head; neck; and trunk	16.6.1	Trauma crânien bénin	Trauma	Exeat	1								24
SOANANDRASANA Marie Jacqueline		1		20	AR	Ménagère	Ambalavola	Taxi	2011-01-18	1899-12-31 23:00:00	2011-01-19	1899-12-31 08:00:00	TS/Nivaquine + Vetsin	TS/Nivaquine + Vetsin	poisoning by nonmedicinal substances	16.11.3	Toxicologie	Intoxication	Exeat	1								20
RANDRIAMBOLOLOMANGA Elisa		1		17	AR	Ecolier	Sotema	Taxi	2011-01-19	1899-12-31 23:40:00	2011-01-20	1899-12-31 06:00:00	Trauma/AC	Multiples écorchures	Superficial injury; contusion	16.8	Multiples écorchures	Trauma	Exeat	1								17
BAZOMA		1		61	VRP (ASMEBO)	Cultivateur	Bemarivo	Taxi	2011-01-20	1899-12-31 00:20:00	2011-01-21	1899-12-31 08:00:00	Toux sèches chroniques + amaigrissement + dyspnée	Bronchopneumopathie chronique dyspnéisante	Obstructive chronic bronchitis	8.2.3	Pathologie respiratoire	Pulmonary	Exeat	1								61
IAMBISOA Nomena Clarisse		1		16	AR	Collégien	Majunga be	Taxi	2011-01-21	1899-12-31 22:30:00	2011-01-21	1899-12-31 23:40:00	Trauma/AC (Moto)	Ecorchures et contusion de la jambe droite /AC	Superficial injury; contusion	16.8	Trauma membre inférieur	Trauma	Exeat	1								16
MBOLA Mahafeno	1			51	AR	Commerçant	Antanimasaja	Taxi	2011-01-21	1899-12-31 21:40:00	2011-01-21	1899-12-31 23:40:00	Trauma / AC	Plaie de 2e et 3e doigts delamain droite/AC	Open wounds of extremities	16.6.2	Trauma membre supérieur	Trauma	Exeat	1							51
RAZAFIMANDIMBILAZA Ledge	1			44	AR	Docker	Tsararano	Taxi	2011-01-21	1899-12-31 21:40:00	2011-01-22	1899-12-31 16:40:00	Trauma / AC	Trauma crânien bénin+plaie MID	Intracranial injury	16.4	Trauma crânien bénin	Trauma	Exeat	1							44
RAZANANIVO Simonette		1		27	AR	Vendeur	Tanambao Sotema	Taxi	2011-01-23	1899-12-31 18:05:00	2011-01-23	1899-12-31 19:30:00	Trauma facial/ARC	Trauma facial/ARC	injury and poisoning	16	Trauma facial	Trauma	Exeat	1								27
RANDRIANANTENAINA Mamy Olivier	1			34	VR (CSB Sotema)	?	Tanambao Sotema	Taxi	2011-01-24	1899-12-31 14:30:00	2011-01-24	1899-12-31 18:00:00	Corps étranger de la région fessière Droite(AD)	Corps étranger de la région fessière Droite(AD)	injury and poisoning	16	Trauma membre inférieur	Trauma	Exeat	1							34
MAMY Solange		1		17	AR	Ecolier	Manjarisoa	Taxi	2011-01-24	1899-12-31 13:00:00	2011-01-24	1899-12-31 20:30:00	TS/raticide	TS/raticide	poisoning by nonmedicinal substances	16.11.3	Toxicologie	Intoxication	Exeat	1								17
RAZANABOAHANGY Eugénie		1		63	AR	Ménagère	Tsaramandroso	Taxi	2011-01-24	1899-12-31 19:30:00	2011-01-25	1899-12-31 11:30:00	Perte de connaissance	Surdosage de Valium	Poisoning by other medications and drugs	16.11.2	Toxicologie	Intoxication	Exeat	1								63
RAZAFINDRAKOTO Romule John	1			21	VRP (Méd libre)	?	Tsararano	Taxi	2011-01-25	1899-12-31 14:35:00	2011-01-26	1899-12-31 08:45:00	TS /Raticide	Autolyse / raticide	Poisoning	16.11	Toxicologie	Intoxication	Exeat	1							21
RIVOARIMALALA Anita		1		30	AR	?	Ambohimandamina	Taxi	2011-01-25	1899-12-31 22:50:00	2011-01-26	1899-12-31 07:00:00	Trauma/ARC	Plaie nasale /ARC	Open wounds of head; neck; and trunk	16.6.1	Trauma ORLO	Trauma	Exeat	1								30
RABEZORO Haja Tantely	1			31	VRP (SMIM)	Cordonnier	Majunga be	Taxi	2011-01-26	1899-12-31 13:10:00	2011-01-26	1899-12-31 20:45:00	Douleur épigastrique chez un éthylique	Epigastralgie post éthylisme	Alcohol-related disorders	5.11	Pathologie digestive	Gastrointestinal	Exeat	1							31
SAHOLIMALALA Christina		1		16	AR	Ecolier	Tsaramandroso	Taxi	2011-01-26	1899-12-31 16:30:00	2011-01-26	1899-12-31 17:40:00	Trauma /chute d'une moto	Simples égratignures	Superficial injury; contusion	16.8	Simples égratignures	Trauma	Exeat	1								16
TANTELY Manitriniaina	1			32	VRP (Médecin libre)	Menuisier	Antanimasaja	Taxi	2011-01-28	1899-12-31 10:10:00	2011-01-28	1899-12-31 16:00:00	Trauma de l'index de la main G/AT	Fracture ouverte de P3 de l'index de la main G /AT	Fracture of upper limb	16.2.3	Trauma membre supérieur	Trauma	Exeat	1							32
JOSE Masiaka	1			23	AR	Boucher	Fiofio	Taxi	2011-01-28	1899-12-31 13:00:00	2011-01-28	1899-12-31 16:00:00	Plaie de la région inguinale droite/objet tranchant	Plaie de la région inguinale droite/objet tranchant (AD)	Open wounds of head; neck; and trunk	16.6.1	Trauma membre inférieur	Trauma	Exeat	1							23
JUMI Hyungjun	1			29	AR	Voyageur	Ambanja	Taxi	2011-01-28	1899-12-31 09:10:00	2011-01-29	1899-12-31 08:00:00	Frisson+douleur abdominale	Syndrome palustre	Other infections; including parasitic	1.4	Pathologie infectieuse	Infectious Disease	Exeat	1							29
NOMPIA Véronique		1		49	VRP(SMIM)	Commerçant	Mahavoky	Taxi	2011-01-29	1899-12-31 14:35:00	2011-01-29	1899-12-31 17:30:00	Lombalgie chronique	Douleur sciatique	Sciatica	13.3.3.4	Pathologie neuro-psy	Neurologic	Exeat	1								49
YVONNE		1		50	AR	?	Manjarisoa	Taxi	2011-02-01	1899-12-31 15:15:00	2011-02-01	1899-12-31 19:30:00	Douleur abdominale aiguë	Colopathie fonctionnelle	Lower gastrointestinal disorders	9.6	Pathologie digestive	Gastrointestinal	Exeat	1								50
RANDRIANJAFY Mandimby Jean Bruton	1			24	AR	Vendeur	Ambalavola	Taxi	2011-02-02	1899-12-31 13:18:00	2011-02-02	1899-12-31 15:30:00	Trauma /ARC	Petite plaie pariétale droite	Open wounds of head; neck; and trunk	16.6.1	Trauma crânien bénin	Trauma	Exeat	1							24
RAHARIMALALA Adeline		1		24	VR (CSB Sotema)	Ménagère	Bazarikely Sotema	Taxi	2011-02-02	1899-12-31 21:15:00	2011-02-03	1899-12-31 06:00:00	TS	IMV / raticide	Poisoning by nonmedicinal substances	16.11.3	Toxicologie	Intoxication	Exeat	1								24
RAZAFIMIHARISOA Florent	1			38	AR	Chauffeur	Antanimalandy	Taxi	2011-02-03	1899-12-31 10:00:00	2011-02-03	1899-12-31 13:45:00	Trauma de la main G/AT	Fracture ouverte de P2 des 2e,3e doigts de la main G/AT	Fracture of upper limb	16.2.3	Trauma membre supérieur	Trauma	Exeat	1							38
RAZANALY Sylvie Velo		1		35	VR (CSB Mahavoky)	Ménagère	Bazarikely Sotema	Taxi	2011-02-03	1899-12-31 11:50:00	2011-02-03	1899-12-31 20:10:00	Perte de connaissance	Dystonie neuro-végétative	Somatoform disorders	5.15.7	Pathologie neuro-psy	Neurologic	Exeat	1								35
RASOARIMAMPIONONA Faramalala		1		35	AR	Ménagère	Antsahavaky	Taxi	2011-02-03	1899-12-31 19:40:00	2011-02-04	1899-12-31 09:00:00	Asthénie + Dyspnée	Dystonie neuro-végétative	Somatoform disorders	5.15.7	Pathologie neuro-psy	Neurologic	Exeat	1								35
TAMBY Fulgence			1	13	AR	Ecolier	Majunga be	Taxi	2011-02-04	1899-12-31 19:10:00	2011-02-04	1899-12-31 21:30:00	Trauma /AC (Moto)	Contusion + égratignures du poignet droit/chute d'une moto	Superficial injury; contusion	16.8	Simple contusion	Trauma	Exeat	1									13
RASOANJANAHARY Marie Fideline		1		16	AR	Cuisiniète	Marovato Abattoir	Taxi	2011-02-05	1899-12-31 10:40:00	2011-02-05	1899-12-31 15:00:00	Intoxication involontaire /raticide dans un yaourt	Intoxication involontaire /raticide dans un yaourt	poisoning by nonmedicinal substances	16.11.3	Toxicologie	Intoxication	Exeat	1								16
BIENVENU Noël	1			21	VR (CSB Mahavoky)	Plongeur	Mahavoky atsimo	Taxi	2011-02-05	1899-12-31 20:15:00	2011-02-06	1899-12-31 07:15:00	Trauma /ARC	Plaies punctiformes multiples /objet pointu (ARC)	Open wounds	16.6	Plaies multiples	Trauma	Exeat	1							21
RASOLOFONIAINA Venancy	1			24	AR	Boucher	Tsararano	Taxi	2011-02-05	1899-12-31 15:30:00	2011-02-06	1899-12-31 07:15:00	Trauma crânien /ARC	Contusion simple du crâne et des membres/ARC	Superficial injury; contusion	16.8	Simple contusion	Trauma	Exeat	1							24
RAVAOSOLO Antoinette		1		49	AR	Ménagère	Ambondrona	Taxi	2011-02-05	1899-12-31 15:30:00	2011-02-06	?	Céphalée intense	Poussée hypertensive	Hypertension with complications and secondary hypertension	7.1.2	Pathologie cardio-vasculaire	Cardiovascular	Exeat	1								49
VOLAHANTA Harimalala		1		44	AR	Ménagère	Androva	Taxi	2011-02-06	1899-12-31 21:00:00	2011-02-06	1899-12-31 22:30:00	Palpitation	Tachycardie sinusale post-émotionnelle	Cardiac dysrhythmias	7.2.9	Pathologie cardio-vasculaire	Cardiovascular	Exeat	1								44
RAKOTONDRAMANANA Jean Denis	1			67	AR	Maçon	La Corniche	Taxi	2011-02-06	1899-12-31 14:05:00	2011-02-07	1899-12-31 10:00:00	Asymétrie faciale + dysarthrie	AVC ischémique (Paralysie faciale G + dysarthrie)	Occlusion of cerebral arteries	7.3.1.2	Pathologie cardio-vasculaire	Cardiovascular	Exeat	1							67
RAJANARISON Aina			1	5	AR	Ecolier	Ambohimandamina	Taxi	2011-02-06	1899-12-31 11:16:00	2011-02-09	1899-12-31 12:30:00	Plaie superficielle du coude droit/AC	Plaie superficielle du coude droit/AC	Open wounds of extremities	16.6.2	Trauma membre supérieur	Trauma	Exeat	1									5
RAKOTOARIVELO Freddy	1			39	AR	Vendeur	Antananarivo	Taxi	2011-02-07	1899-12-31 05:10:00	2011-02-07	1899-12-31 07:00:00	Trauma thoracique/AC	Contusion thoracique bénigne	Superficial injury; contusion	16.8	Trauma thoracique bénin	Trauma	Exeat	1							39
RAHARIVELOMANANTSOA Ando			1	10	AR	Ecolier	Antananarivo	Taxi	2011-02-07	1899-12-31 05:10:00	2011-02-07	1899-12-31 07:00:00	Trauma/AC	Contusion thoracique bénigne	Superficial injury; contusion	16.8	Trauma thoracique bénin	Trauma	Exeat	1									10
SOARINAIVO Lolona Jeanne		1		29	VRP (SOS Méd)	Instituteur	Mahabibokely	Taxi	2011-02-11	1899-12-31 08:20:00	2011-02-11	1899-12-31 19:40:00	Epigastralgie rebelle aux traitements	Gastro-entérite	intestinal infection	9.1	Infection digestive	Infectious Disease	Exeat	1								29
RAZAFIARISOA Marie Justine		1		19	AR	Ménagère	Mahavoky nord	Taxi	2011-02-12	1899-12-31 00:30:00	2011-02-12	1899-12-31 06:00:00	Perte de connaissance	Hypoglycémie	Endocrine; nutritional; and metabolic diseases and immunity disorders	3	Pathologie métabolique	Endocrine	Exeat	1								19
TSIRESY Aristide			1	8	AR	Ecolier	Tsararano ambany	Taxi	2011-02-12	1899-12-31 18:00:00	2011-02-12	1899-12-31 19:30:00	Trauma/chute d'un vélo	Contusion bénigne pariétale gauche	Superficial injury; contusion	16.8	Simple contusion	Trauma	Exeat	1									8
AÏATI		1		17	AR	Ecolier	Mangarivotra	Taxi	2011-02-12	1899-12-31 15:00:00	2011-02-12	1899-12-31 19:00:00	TS pluri-médicamenteux	IMV pluri médicamenteux	Poisoning by other medications and drugs	16.11.2	Toxicologie	Intoxication	Exeat	1								17
RANDRIAMPARANY Sandrine		1		16	VRP (FSFA)	Ecolier	Mahavoky sud	Taxi	2011-02-12	1899-12-31 09:00:00	2011-02-12	1899-12-31 17:07:00	Perte de connaissance	Dystonie neuro-végétative	Somatoform disorders	5.15.7	Pathologie neuro-psy	Neurologic	Exeat	1								16
TSILAVINA Nambinintsoa	1			13	AR	Ecolier	Antanimalandy	Taxi	2011-02-12	1899-12-31 15:00:00	2011-02-13	1899-12-31 07:00:00	Noyade	Noyade	injury and poisoning	16	Noyade	Pulmonary	Exeat	1							13
IBRAHIM Rachid	1			38	AR	Commerçant	Manga	Taxi	2011-02-13	1899-12-31 20:30:00	2011-02-13	1899-12-31 22:30:00	Trauma facial / ARC	Trauma facial / ARC	injury and poisoning	16	Trauma facial	Trauma	Exeat	1							38
RAKOTONINDRIANA Séverin	1			59	AR	Chauffeur	Mahavoky avaratra	Taxi	2011-02-13	1899-12-31 17:31:00	2011-02-13	1899-12-31 18:30:00	Trauma/objet tranchant (vitre) /AD	Plaie sous-orbitaire par objet tranchant	Open wounds of head; neck; and trunk	16.6.1	Plaie faciale	Trauma	Exeat	1							59
RAKOTOZANANY Augustin	1			52	AR	Servant	Mahavoky avaratra	Taxi	2011-02-17	1899-12-31 13:00:00	2011-02-17	1899-12-31 18:00:00	Syndrome allergique	Allergie au Diclofénac	Allergic reactions	17.1.9	Allergie	Anaphylaxis	Exeat	1							52
RANDRIANJAFINOELY Rijasoa	1			35	AR	Instituteur	Tsaramandroso	Taxi	2011-02-21	1899-12-31 11:15:00	2011-02-21	1899-12-31 21:50:00	Nausée après prise de coca-cola	Intoxication alimentaire	intestinal infection	9.1	Toxicologie	Intoxication	Exeat	1							35
MENABE Polas	1			35	AR	Pêcheur	Mahavoky avaratra	Taxi	2011-02-22	1899-12-31 23:50:00	2011-02-23	1899-12-31 07:45:00	Trauma /AC	Ecorchure pariétale/AC	Superficial injury; contusion	16.8	Simple écorchure	Trauma	Exeat	1							35
SITRAKINIAINA Johnny			1	8	AR	Ecolier	Aranta	Taxi	2011-02-23	1899-12-31 16:20:00	2011-02-23	1899-12-31 18:00:00	Trauma/AC	Plaies temporales droites superficielles/AC	Open wounds of head; neck; and trunk	16.6.1	Plaies temporales bénignes	Trauma	Exeat	1									8
FARAVAVY		1		50	VR (CSB Mahavoky)	Marchande	Tsararano Nosikely	Taxi	2011-02-23	1899-12-31 10:40:00	2011-02-23	1899-12-31 11:30:00	Otorragie /ARC	Plaie au niveau de la racine de l'oreille droite	Open wounds of head; neck; and trunk	16.6.1	Trauma ORLO	Trauma	Exeat	1								50
ZERIA Julienne			1	12	AR	Ecolier	Tsararano ambany	Taxi	2011-02-25	1899-12-31 11:05:00	2011-02-25	1899-12-31 16:10:00	Trauma/AC	Simple contusion	Superficial injury; contusion	16.8	Simple contusion	Trauma	Exeat	1									12
RANOTAHINASOA Claudia		1		22	AR	Etudiant	Mangarivotra	Taxi	2011-02-25	1899-12-31 19:30:00	2011-02-25	1899-12-31 21:30:00	Tentative de suicide	IMV (6cp CIPLA)	Poisoning by other medications and drugs	16.11.2	Toxicologie	Intoxication	Exeat	1								22
RAKOTOFIRINGA Verotiana		1		29	AR	Ménagère	Tanambao Sotema	Taxi	2011-02-27	1899-12-31 18:45:00	2011-02-27	1899-12-31 20:00:00	Morsure humaine au niveau de l'oreille droite	Plaie de l'oreille droite/morsure humaine	Open wounds of head; neck; and trunk	16.6.1	Morsure humaine	Trauma	Exeat	1								29
DIDIER Mong Gine	1			20	VRP (SMIM)	Etudiant	Ambondrona	Taxi	2011-02-27	1899-12-31 09:31:00	2011-02-27	1899-12-31 11:30:00	Trauma /objet tranchant de l'avant-bras droit	Plaie /objet tranchant de l'avant-bras droit	Open wounds of extremities	16.6.2	Trauma membre supérieur	Trauma	Exeat	1							20
YVON Tichev			1	5	AR	Ecolier	Tsaramandroso ambany	Taxi	2011-02-28	1899-12-31 14:25:00	2011-02-28	1899-12-31 17:30:00	Trauma/AC	Multiples écorchures/AC	Superficial injury; contusion	16.8	Multiples écorchures	Trauma	Exeat	1									5
JEAN FILA	1			28	VR (CSB Tsararano)	Vendeur	Tsararano ambony	Taxi	2011-03-01	1899-12-31 09:40:00	2011-03-01	1899-12-31 12:00:00	Trauma de la plante du pied/objet pointu	Plaie hémorragique de la plante du pied / objet pointu	Open wounds of extremities	16.6.2	Trauma membre inférieur	Trauma	Exeat	1							28
RANDRIANKENA Kevin			1	8	AR	Ecolier	Tanambao Sotema	Taxi	2011-03-01	1899-12-31 12:45:00	2011-03-02	1899-12-31 17:00:00	Trauma crânien / chute	Trauma crânien / chute	Intracranial injury	16.4	Trauma crânien bénin	Trauma	Exeat	1									8
ALAN Robino Augustin			1	1	AR		Abattoir	Taxi	2011-03-02	1899-12-31 22:10:00	2011-03-02	1899-12-31 22:40:00	Trauma/AC	Simple contusion /AC	Superficial injury; contusion	16.8	Simple contusion	Trauma	Exeat	1									1
MAROZA Velo Arison	1			31	AR	Ouvrier de bois	Tsaramandroso ambany	Taxi	2011-03-03	1899-12-31 11:00:00	2011-03-03	1899-12-31 17:00:00	Trauma du 4e doigt de la main droite/AT	Fracture ouverte de P3 du 4e doigt de la main droite / AT	Fracture of upper limb	16.2.3	Trauma membre supérieur	Trauma	Exeat	1							31
RAFANOMEZANTSOA Cédric			1	5	AR	Ecolier	Tsararano ambony	Taxi	2011-03-03	1899-12-31 12:30:00	2011-03-03	1899-12-31 18:45:00	Plaie frontale par objet tranchant (tôle)	Plaie frontale par objet tranchant (tôle) / AD	Open wounds of head; neck; and trunk	16.6.1	Simple plaie frontale	Trauma	Exeat	1									5
DINO Xavier			1	7	AR	Ecolier	Mahavoky avaratra	Taxi	2011-03-04	1899-12-31 20:30:00	2011-03-04	1899-12-31 21:30:00	Ingestion accidentelle par bille	Corps étranger de l'œsophage par bille	injury and poisoning	16	Corps étranger	Trauma	Exeat	1									7
HIOBY	1			20	AR	Commerçant	Mahabibo	Taxi	2011-03-05	1899-12-31 03:30:00	2011-03-05	1899-12-31 21:00:00	Trauma crânien/ARC	Trauma crânien bénin/ARC	Intracranial injury	16.4	Trauma crânien bénin	Trauma	Exeat	1							20
RAZAFIMAHATRATRA Raymond	1			24	AR	Receveur	Mahatsinjo	Taxi	2011-03-05	1899-12-31 12:25:00	2011-03-05	1899-12-31 14:30:00	Trauma crânien /AC	Simples écorchures du bras droit et genou droit	Superficial injury; contusion	16.8	Simples écorchures	Trauma	Exeat	1							24
SAHOLINIRINA Elisa		1		36	AR	Ménagère	Mangarivotra	Taxi	2011-03-05	1899-12-31 13:50:00	2011-03-05	1899-12-31 15:30:00	Trauma du coude G/Ac	Contusion du coude G/AC	Superficial injury; contusion	16.8	Trauma membre supérieur	Trauma	Exeat	1								36
XUE XIAD Ying		1		23	AR	Commerçant	Manga	Taxi	2011-03-05	1899-12-31 18:25:00	2011-03-06	1899-12-31 08:00:00	Hyperthermie+céphalées post-partum	Syndrome palustre	Other infections; including parasitic	1.4	Pathologie infectieuse	Infectious Disease	Exeat	1								23
MOUSTAFA Hassany	1			40	VR (SOS Médecins)	Chômeur	Mahabibokely	Taxi	2011-03-06	1899-12-31 01:30:00	2011-03-06	1899-12-31 08:00:00	Encombrement chez un éthylique	Coma éthylique	Alcohol-related disorders	5.11	Toxicologie	Intoxication	Exeat	1							40
RAKOTONDRASOA Mahatana		1		15	AR	Ecolier	Marovato	Taxi	2011-03-09	1899-12-31 15:30:00	2011-03-09	1899-12-31 18:20:00	Trauma /chute	Trauma bénin de la hanche /chute	injury and poisoning	16	Trauma bénin de la hanche	Trauma	Exeat	1								15
RAMAROSON Noëline		1		40	AR	Ménagère	Mahavoky avaratra	Taxi	2011-03-10	1899-12-31 21:00:00	2011-03-10	1899-12-31 22:00:00	Trauma / AC	Plaies multiples /AC	Open wounds	16.6	Plaies multiples	Trauma	Exeat	1								40
MANAIGNIAVY Richard			1	13	AR	Ecolier	Ambalavola	Taxi	2011-03-11	1899-12-31 16:40:00	2011-03-11	1899-12-31 19:30:00	Perte de connaissance /ARC	Simple contusion + DNV	Superficial injury; contusion	16.8	Simple contusion	Trauma	Exeat	1									13
RAHANITRA Maminiaina	1			22	AR	Collecteur de crevettes	Mahavoky avaratra	Taxi	2011-03-11	1899-12-31 10:15:00	2011-03-11	1899-12-31 18:00:00	Plaie axillaire gauche /arme blanche (ARC)	Plaie superficielle axillaire gauche /arme blanche (ARC)	Open wounds of head; neck; and trunk	16.6.1	Trauma membre supérieur	Trauma	Exeat	1							22
MARIE Jean Noëline		1		56	AR	Couturière	Majunga be	Taxi	2011-03-11	1899-12-31 20:30:00	2011-03-12	1899-12-31 08:30:00	Vertiges+nausées+vomissements	Indigestion +asthénie	Diseases of the digestive system	9	Pathologie digestive	Gastrointestinal	Exeat	1								56
ARLYS Astrid	1			22	AR	Etudiant	Hotel tranquille	Taxi	2011-03-13	1899-12-31 11:20:00	2011-03-13	1899-12-31 13:30:00	Lipothymie	Hypocalcémie probable	Fluid and electrolyte disorders	3.8	Pathologie métabolique	Endocrine	Exeat	1							22
MOHAMED RIAZ	1			34	VRP (Osiem)	Contre-maître	Amborovy	Taxi	2011-03-14	1899-12-31 14:45:00	2011-03-14	1899-12-31 17:20:00	Trauma thoracique /AC	Contusion latéro-thoracique droite/AC	Superficial injury; contusion	16.8	Trauma thoracique bénin	Trauma	Exeat	1							34
RASOLOMAMPIONONA Hnitra Oliarisoa		1		34	AR	Ménagère	Tsaramandroso	Taxi	2011-03-14	1899-12-31 20:10:00	2011-03-15	1899-12-31 09:00:00	Perte de connaissance brève	Dystonie neuro-végétative	Somatoform disorders	5.15.7	Pathologie neuro-psy	Neurologic	Exeat	1								34
HERINJANAHARY Marcellin	1			35	AR	Cultivateur	Mampikony	Taxi	2011-03-15	08/:30	2011-03-16	1899-12-31 08:10:00	Epigastralgie intense+vomissement bilieux	Gastrite aiguë	Gastritis and duodenitis	9.4.3	Pathologie digestive	Gastrointestinal	Exeat	1							35
SANDRIAH Marie Ange		1		20	AR	?	Antanimasaja	Taxi	2011-03-16	1899-12-31 19:20:00	2011-03-16	1899-12-31 20:00:00	Trauma du pied et du coude G/AC	Simples écorchures	Superficial injury; contusion	16.8	Simples écorchures	Trauma	Exeat	1								20
RAMINOSOA Ringa			1	14	VRP (Méd libre)	Ecolier	Tsaramandroso ambany	Taxi	2011-03-18	1899-12-31 12:40:00	2011-03-18	1899-12-31 18:25:00	Polytrauma /ARC	Trauma facial bénin	injury and poisoning	16	Trauma facial bénin	Trauma	Exeat	1									14
RAZANABAHOAKA H. Sarah		1		24	AR	Vendeur	Mahavoky avaratra	Taxi	2011-03-18	1899-12-31 15:45:00	2011-03-18	1899-12-31 19:00:00	Perte de connaissance	Dystonie neuro-végétative	Somatoform disorders	5.15.7	Pathologie neuro-psy	Neurologic	Exeat	1								24
JAORAVO	1			50	AR	?	Fiofio	Taxi	2011-03-19	1899-12-31 20:30:00	2011-03-19	1899-12-31 21:30:00	Trauma /AC	Plaie de la paupière inférieure de l'œil droit + fracture du 1/3 inférieur du péronée droit	Open wounds of head; neck; and trunk	16.6.1	Trauma membre inférieur	Trauma	Exeat	1							50
RAKOTOHASIMBOLA Kevin			1	2	AR	?	Mahavoky avaratra	Taxi	2011-03-19	1899-12-31 06:45:00	2011-03-20	1899-12-31 08:00:00	Perte de connaissance /chute dans l'escalier	Trauma crânien bénin/chute	Intracranial injury	16.4	Trauma crânien bénin	Trauma	Exeat	1									2
RAHARIMALALA Lydia		1		42	AR	Ménagère	Tsararano ambony	Taxi	2011-03-20	1899-12-31 13:50:00	2011-03-20	1899-12-31 16:00:00	Trauma crânien /AC	Plaie frontale G/AC	Open wounds of head; neck; and trunk	16.6.1	Trauma crânien bénin	Trauma	Exeat	1								42
SOA Madeleine		1		60	AR	Ménagère	Aranta	Taxi	2011-03-20	1899-12-31 19:50:00	2011-03-21	1899-12-31 08:00:00	Douleur lombaire + précordialgie	Rachialgie dorsale	Lumbago	13.3.3.3	Pathologie neuro-psy	Neurologic	Exeat	1								60
SOAMANERA Roxane Zafisoa		1		21	VR (CSB Tsararano)	Etudiant	Tsararano ambony	Taxi	2011-03-21	1899-12-31 00:50:00	2011-03-21	1899-12-31 08:00:00	Crise cardique et vertige	Dystonie neuro-végétative	Somatoform disorders	5.15.7	Pathologie neuro-psy	Neurologic	Exeat	1								21
RAMAMONJISOA Hantavololona		1		24	AR	Comptable	Tsaramandroso	Taxi	2011-03-22	1899-12-31 11:30:00	2011-03-22	1899-12-31 12:45:00	Luxation non traumatique de l'épaule droite	Luxation non traumatique de l'épaule droite	Joint disorders and dislocations; trauma-related	16.1	Trauma membre supérieur	Trauma	Exeat	1								24
RAMAMONJISOA Johnson	1			45	AR	Dépanneur radio	Morafeno	Taxi	2011-03-22	1899-12-31 09:15:00	2011-03-22	1899-12-31 15:00:00	Trauma crânien et abdominal /ARC	Contusion abdominale	Superficial injury; contusion	16.8	Trauma abdominal bénin	Trauma	Exeat	1							45
RAKOTOMANDIMBY Ernestine		1		58	AR	Ménagère	Tanambao Sotema	Taxi	2011-03-22	1899-12-31 09:10:00	2011-03-22	1899-12-31 18:45:00	Etat subocclusif	Subocclusion intestinale fonctionnelle	Other intestinal obstruction	9.6.3.4	Pathologie digestive	Gastrointestinal	Exeat	1								58
GINAH		1		27	AR	Etudiant	Tsaramandroso	Taxi	2011-03-24	1899-12-31 08:10:00	2011-03-25	1899-12-31 18:00:00	Intoxication à la nivaquine	IMV / 13 plaquettes de nivaquine	Poisoning by other medications and drugs	16.11.2	Toxicologie	Intoxication	Exeat	1								27
RAHARISON Max Andry	1			34	AR	Commerçant	Tsaramandroso	Taxi	2011-03-25	1899-12-31 20:05:00	2011-03-25	1899-12-31 21:40:00	Plaie de l'aile droit du nez /objet tranchant	Plaie de l'aile droit du nez /objet tranchant	Open wounds of head; neck; and trunk	16.6.1	Trauma ORLO	Trauma	Exeat	1							34
FRANCISCA		1		16	AR	Ecolier	Abattoir	Taxi	2011-03-25	1899-12-31 21:20:00	2011-03-26	1899-12-31 08:00:00	Intoxication médicamenteuse volontaire	Intoxication pluri-médicamenteuse volontaire	Poisoning by other medications and drugs	16.11.2	Toxicologie	Intoxication	Exeat	1								16
RAMORASATA Bodo Sahondra		1		42	AR	Ménagère	Antsahavaky	Taxi	2011-03-25	1899-12-31 22:50:00	2011-03-26	1899-12-31 08:00:00	Crise de spasmophilie	Dystonie neuro-végétative	Somatoform disorders	5.15.7	Pathologie neuro-psy	Neurologic	Exeat	1								42
ANGITIANA Sandrine		1		29	AR	Ménagère	Tsararano ambony	Taxi	2011-03-26	1899-12-31 21:45:00	2011-03-27	1899-12-31 08:00:00	Douleur abdominale diffuse	Colopathie fonctionnelle	Lower gastrointestinal disorders	9.6	Pathologie digestive	Gastrointestinal	Exeat	1								29
RANJALAHY Nambinintsoa Rado	1			22	AR	Mécanicien	Tanambao Sotema	Taxi	2011-03-26	1899-12-31 23:20:00	2011-03-27	1899-12-31 00:15:00	Trauma /AC	Ecorchures multiples	Superficial injury; contusion	16.8	Ecorchures multiples	Trauma	Exeat	1							22
RABEKOTO Donat	1			17	AR	Ecolier	Abattoir	Taxi	2011-03-27	1899-12-31 11:30:00	2011-03-27	1899-12-31 14:00:00	Douleur aiguë de la FIG	Microlithiases ureterales	calculus of ureter	10.1.5.2	Pathologie urologique	Urologic	Exeat	1							17
RANDRIANIAINA François	1			22	VRP (Salfa)	Mécanicien	Amboaboaka	Taxi	2011-03-27	1899-12-31 21:30:00	2011-03-28	1899-12-31 08:00:00	Trauma crânien /AC	Ecorchures multiples de l'hémiface droite / AC	Superficial injury; contusion	16.8	Trauma facial	Trauma	Exeat	1							22
RAVAONASOLONIRINA		1		17	VR (CSB Mahabibo)	Ecolier	Ambalamanga	Taxi	2011-03-28	1899-12-31 19:35:00	2011-03-28	1899-12-31 21:40:00	Tentative de suicide	IMV / Amoxicilline 4g+Ibuprofène 2cp+charbon 2cp	Poisoning by other medications and drugs	16.11.2	Toxicologie	Intoxication	Exeat	1								17
RAKOTONDRATSIMBA Livatiana		1		28	AR	Ménagère	Tsaramandroso	Taxi	2011-03-29	1899-12-31 18:30:00	2011-03-29	1899-12-31 19:30:00	Trauma dorso-lombaire / ARC	Contusion dorsale /ARC	Superficial injury; contusion	16.8	Simple contusion	Trauma	Exeat	1								28
RAZAFIARISOA Gerardine		1		23	AR	Etudiant	Ampasika	Taxi	2011-03-29	1899-12-31 11:20:00	2011-03-29	1899-12-31 15:15:00	Douleur abdominale	Dysménorrhée	Menstrual disorders	10.3.5	Pathologie gynéco-obstétrique	Gynecologic	Exeat	1								23
TOTOZAMANY Julie Christine		1		48	AR	Ménagère	Antanimasaja	Taxi	2011-03-29	1899-12-31 09:10:00	2011-03-29	1899-12-31 15:15:00	Douleur thoracique + dyspnée	Dystonie neuro-végétative	Somatoform disorders	5.15.7	Pathologie neuro-psy	Neurologic	Exeat	1								48
RANJAKAHARIMANANA	1			32	VR (CSB Mahabibo)	?	Amboaboaka	Taxi	2011-03-30	1899-12-31 11:30:00	2011-03-30	1899-12-31 12:30:00	Trauma /AT	Plaie du bras droit /AT	Open wounds of extremities	16.6.2	Trauma membre supérieur	Trauma	Exeat	1							32
TINAHY	1			21	VRP (Méd libre)	Chômeur	Mahavoky atsimo	Taxi	2011-03-30	1899-12-31 11:30:00	2011-03-31	1899-12-31 08:00:00	Anorexie+asthénie	Syndrome typhique	Other gram negative septicemia	1.1.2.4	Pathologie infectieuse	Infectious Disease	Exeat	1							21
MAKA	1			37	AR	Agent de sécurité	Ambondrona	Taxi	2011-03-31	1899-12-31 07:20:00	2011-03-31	1899-12-31 20:35:00	Trauma /ARC	Ecchymose sous palpébrale droite + hématome du coude droit	Superficial injury; contusion	16.8	Trauma facial bénin	Trauma	Exeat	1							37
ABDALLAH Hamad	1			38	AR	Menuisier	Tsararano ambony	Taxi	2011-03-31	1899-12-31 10:25:00	2011-03-31	1899-12-31 21:00:00	Trauma /AC	Plaie profonde du talon G	Open wounds of extremities	16.6.2	Trauma membre inférieur	Trauma	Exeat	1							38
CYRILLE	1			31	AR	Infirmier	Mahavoky avaratra	Taxi	2011-03-31	1899-12-31 15:30:00	2011-03-31	1899-12-31 20:00:00	Trauma /AC	Plaie délabrée du 2e orteil du pied gauche/AC	Open wounds of extremities	16.6.2	Trauma membre inférieur	Trauma	Exeat	1							31
RABETIA Noely	1			29	AR	Tireur de pousse-pousse	Betamanga	Taxi	2011-03-31	1899-12-31 19:40:00	2011-04-01	1899-12-31 14:00:00	Trauma crânien /ARC	Plaie pariéto-occipitale	Open wounds of head; neck; and trunk	16.6.1	Trauma crânien bénin	Trauma	Exeat	1							29
NOELY	1			33	AR	Tireur de pousse-pousse	Tsararano ambany	Taxi	2011-04-01	1899-12-31 14:15:00	2011-04-01	1899-12-31 16:15:00	Trauma /AC	Subluxation métacarpo-phalangienne du pouce gauche /AC	Joint disorders and dislocations; trauma-related	16.1	Trauma membre supérieur	Trauma	Exeat	1							33
TATAMO		1		23	VR (CSB Sotema)	Ménagère	Antanimalandy	Taxi	2011-04-01	1899-12-31 21:10:00	2011-04-01	1899-12-31 23:00:00	Trauma crânien /ARC	Plaie du cuir chevelu + ecchymose péri-orbitaire gauche	Open wounds of head; neck; and trunk	16.6.1	Trauma crânio-facial bénin	Trauma	Exeat	1								23
LANDY		1		29	AR	Policier	Hotel Plaza	Taxi	2011-04-02	1899-12-31 15:30:00	2011-04-02	1899-12-31 19:30:00	Agitation + trouble de conscience	Hypoglycémie	Endocrine; nutritional; and metabolic diseases and immunity disorders	3	Pathologie métabolique	Endocrine	Exeat	1								29
FRANCETTE Marie		1		18	VR (CSB Tsararano)	?	Tsararano ambony	Taxi	2011-04-02	1899-12-31 08:30:00	2011-04-02	1899-12-31 14:00:00	Trauma / ARC	Plaie frontale droite bénigne	Open wounds of head; neck; and trunk	16.6.1	Trauma crânien bénin	Trauma	Exeat	1								18
JUDITH Germaine		1		19	AR	Ménagère	Ambohimandamina	Taxi	2011-04-03	1899-12-31 15:30:00	2011-04-04	1899-12-31 08:00:00	Tentative de suicide	IMV/20cp de chloroquine	Poisoning by other medications and drugs	16.11.2	Toxicologie	Intoxication	Exeat	1								19
ASMAI Mohamed	1			30	AR	?	Ambondrona	Taxi	2011-04-03	1899-12-31 22:20:00	2011-04-04	1899-12-31 09:00:00	Dyspnée+ douleur abdominale	Dystonie neuro-végétative	Somatoform disorders	5.15.7	Pathologie neuro-psy	Neurologic	Exeat	1							30
RANDRIANASOLO Auguste	1			29	AR	Mécanicien	Ambondrona	Taxi	2011-04-05	1899-12-31 17:35:00	2011-04-05	1899-12-31 19:20:00	Ecchymose sus orbitaire/ARC	Trauma facial/ARC	injury and poisoning	16	Trauma facial bénin	Trauma	Exeat	1							29
NARINDRANIAINA Olivia Patricia		1		18	AR	Etudiant	Ambalavola	Taxi	2011-04-05	1899-12-31 05:00:00	2011-04-05	1899-12-31 08:00:00	Perte de connaissance	Dystonie neuro-végétative	Somatoform disorders	5.15.7	Pathologie neuro-psy	Neurologic	Exeat	1								18
MIHARISOA Tharcille		1		20	AR	Etudiant	Manjarisoa	Taxi	2011-04-06	1899-12-31 15:10:00	2011-04-06	1899-12-31 17:00:00	Trauma /AC	Ecorchure de la jambe droite	Superficial injury; contusion	16.8	Simple écorchure	Trauma	Exeat	1								20
RATOHALAHY Jean de Dieu	1			28	AR	Etudiant	Tsaramandroso	Taxi	2011-04-07	1899-12-31 08:30:00	2011-04-07	1899-12-31 09:00:00	Trauma frontal avec corps étranger(éclat de vitre) / AC	Trauma frontal avec corps étranger(éclat de vitre)	injury and poisoning	16	Trauma crânien bénin	Trauma	Exeat	1							28
DESSENS Estelle		1		36	VRP (Méd libre)	Ménagère	Ambondrona	Taxi	2011-04-07	1899-12-31 10:30:00	2011-04-07	1899-12-31 11:20:00	Douleur du 4e doigt /chute + vomissement incoercible	Contusion du 4e doigt de la main gauche	Superficial injury; contusion	16.8	Trauma membre supérieur	Trauma	Exeat	1								36
RAKOTONANDRASANA Samson	1			33	AR	Contrôleur sécurité	Mangarivotra	Taxi	2011-04-07	1899-12-31 22:10:00	2011-04-07	1899-12-31 23:15:00	Trauma MSD / AC	Contusion de l'avant-bras droit	Superficial injury; contusion	16.8	Trauma membre supérieur	Trauma	Exeat	1							33
HERINIAINA Jean Rija	1			32	VR (CSB Sotema)	?	Ambohimandamina	Taxi	2011-04-07	1899-12-31 21:15:00	2011-04-08	1899-12-31 08:00:00	Contracture abdominale	Intolérance alimentaire	intestinal infection	9.1	Pathologie digestive	Gastrointestinal	Exeat	1							32
ANDRIANASY Albert	1			40	AR	Conducteur	Fitim	Taxi	2011-04-08	1899-12-31 10:30:00	2011-04-08	1899-12-31 11:00:00	Trauma /ARC	Ecchymose multiple de la face	Superficial injury; contusion	16.8	Trauma facial bénin	Trauma	Exeat	1							40
RAVELONJANAHARY Wilfred Urbain	1			27	AR	Maçon	Ambalanomby	Taxi	2011-04-08	1899-12-31 02:55:00	2011-04-08	1899-12-31 07:00:00	Douleur épigastrique	Ulcère gastrique	Gastric ulcer	9.4.2.1	Pathologie digestive	Gastrointestinal	Exeat	1							27
RANDRIANARISON Régis	1			45	AR	Maçon	Mahavoky	Taxi	2011-04-08	1899-12-31 23:30:00	2011-04-09	1899-12-31 08:30:00	Vomissements + diarrhées liquides	Gastro-entérite	intestinal infection	9.1	Pathologie infectieuse	Infectious Disease	Exeat	1							45
BAO Perlette		1		40	VR (CSB Tsararano)	?	Tsararano Nosikely	Taxi	2011-04-09	1899-12-31 22:20:00	2011-04-10	1899-12-31 08:00:00	Douleur abdominale + épigastralgie	Intolérance alimentaire	intestinal infection	9.1	Pathologie digestive	Gastrointestinal	Exeat	1								40
ZORAH		1		36	AR	Ménagère	Tsararano ambony	Taxi	2011-04-09	1899-12-31 22:30:00	2011-04-10	1899-12-31 09:20:00	Tentative de suicide	IMV /produit inconnu	Poisoning	16.11	Toxicologie	Intoxication	Exeat	1								36
HERIMAMY Luciano Jimmy	1			22	VR (CSB Mahavoky)	Ecolier	Tsaramandroso	Taxi	2011-04-09	1899-12-31 23:55:00	2011-04-10	1899-12-31 12:00:00	Trauma /ARC	Contusion de l'hémithorax gauche/Arc	Superficial injury; contusion	16.8	Trauma thoracique	Trauma	Exeat	1							22
PAUL Mathieu	1			33	AR	?	Ampasika	Taxi	2011-04-10	1899-12-31 01:40:00	2011-04-10	1899-12-31 04:00:00	Trauma /AC	Plaies faciales multiples	Open wounds of head; neck; and trunk	16.6.1	Trauma facial bénin	Trauma	Exeat	1							33
RAZAFINDRANAIVO Tsanta Jerémia			1	7	VR (CSB Mahavoky)	Ecolier	Tsaramandroso	Taxi	2011-04-12	1899-12-31 18:00:00	2011-04-13	1899-12-31 07:00:00	Trauma / AS	Contusion abdominale	Superficial injury; contusion	16.8	Simple contusion	Trauma	Exeat	1									7
BIALAHY Jean Baptiste	1			18	VR (CSB Sotema)	Cultivateur	Ambalakida	Taxi	2011-04-12	1899-12-31 18:15:00	2011-04-13	1899-12-31 08:00:00	Trauma de la main droite /AT	Plaie délabrée de la main droite et du poignet	Open wounds of extremities	16.6.2	Trauma membre supérieur	Trauma	Exeat	1							18
RASOAMANANJARA Eva Rosa		1		37	AR	Ménagère	Ambalavola	Taxi	2011-04-14	1899-12-31 23:00:00	2011-04-15	1899-12-31 09:00:00	Prurit généralisé	Urticaire prurigineuse généralisée d'origine méconnue	allergic reactions	17.1.9	Allergie	Anaphylaxis	Exeat	1								37
BAKOARITIANA Solohanta Dezy		1		30	AR	Coiffeuse	Tsaramandroso	Taxi	2011-04-14	1899-12-31 23:00:00	2011-04-15	1899-12-31 08:00:00	Dyspnée + asthénie	Dystonie neuro-végétative	Somatoform disorders	5.15.7	Pathologie neuro-psy	Neurologic	Exeat	1								30
ZEZE Jean Norbert	1			34	AR	Bricoleur	Terrain mena	Taxi	2011-04-15	1899-12-31 23:00:00	2011-04-16	1899-12-31 00:10:00	Trauma facial / ARC	Trauma facial / ARC	injury and poisoning	16	Trauma facial	Trauma	Exeat	1							34
RATSIMBAZAFY Jean de Dieu	1			26	AR	Pêcheur	Ambalahonko	Taxi	2011-04-15	1899-12-31 11:22:00	2011-04-16	1899-12-31 08:00:00	Plaie pénétrante abdominale par queue de Makoba	Plaie pénétrante abdominale par queue de Makoba	Open wounds of head; neck; and trunk	16.6.1	Trauma abdominal	Trauma	Exeat	1							26
RAKOTOSON Santatriniaina		1		18	AR	Ecolier	Tsararano ambony	Taxi	2011-04-15	1899-12-31 22:30:00	2011-04-16	1899-12-31 08:00:00	Dyspnée	Dystonie neuro-végétative	Somatoform disorders	5.15.7	Pathologie neuro-psy	Neurologic	Exeat	1								18
MATOISOA	1			27	AR	Tireur de pousse-pousse	Fiofio	Taxi	2011-04-16	1899-12-31 20:45:00	2011-04-16	1899-12-31 21:30:00	Trauma crânien /ARC	Plaie linéaire profonde fronto-pariétale	Open wounds of head; neck; and trunk	16.6.1	Trauma crânien	Trauma	Exeat	1							27
FANOMEZANTSOA Tafita	1			21	VR (CSB Mahavoky)	Etudiant	Tsaramandroso	Taxi	2011-04-17	1899-12-31 21:10:00	2011-04-17	1899-12-31 22:30:00	Plaie dorsale /objet tranchant (ARC)	Plaie dorsale hémorragique /objet tranchant (ARC)	Open wounds of extremities	16.6.2	Trauma dorsal	Trauma	Exeat	1							21
ANDRIANANTENAINA Laza Henintsoa	1			19	AR	Etudiant	Mahatsinjo	Taxi	2011-04-17	1899-12-31 22:45:00	2011-04-18	1899-12-31 02:30:00	TS /alcool +Vetsin	TS /alcool +Vetsin	poisoning by nonmedicinal substances	16.11.3	Toxicologie	Intoxication	Exeat	1							19
BONEVETIRA Guyan	1			23	AR	Tireur de pousse-pousse	Amborovy	Taxi	2011-04-18	1899-12-31 09:20:00	2011-04-18	1899-12-31 18:00:00	Trauma crânien / ARC	Trauma crânien bénin/ ARC	Intracranial injury	16.4	Trauma crânien bénin	Trauma	Exeat	1							23
ERNESTINE		1		20	AR	Vendeur	Tsararano Nosikely	Taxi	2011-04-19	1899-12-31 21:03:00	2011-04-20	1899-12-31 08:30:00	Perte de connaissance	Dystonie neuro-végétative	Somatoform disorders	5.15.7	Pathologie neuro-psy	Neurologic	Exeat	1								20
RASOANAKARINA		1		34	VR (SOS Médecin)	Chanteur	Betamanga	Taxi	2011-04-20	1899-12-31 15:05:00	2011-04-20	1899-12-31 17:00:00	Trauma du pied G / piqûre d'insecte marin	Douleur du pied gauche /piqûre d'insecte marin	injury and poisoning	16	Piqûre d'insecte	Trauma	Exeat	1								34
ANDRIAMBELONIAINA Tatiana Yvette			1	10	AR	Ecolier	Croisement Village touristique	Taxi	2011-04-20	1899-12-31 19:45:00	2011-04-20	1899-12-31 20:30:00	Trauma / chute dans un canal	Contusion lombaire bénigne /chuite + DNV	Superficial injury; contusion	16.8	Simple contusion	Trauma	Exeat	1									10
MOHAMED ALI	1			23	AR	Menuisier	Morafeno	Taxi	2011-04-20	1899-12-31 17:40:00	2011-04-20	1899-12-31 23:45:00	Trauma du 4e doigt de la main droite /AT	Fracture ouverte avec plaie délabrée du 4e doigt de la main droite /AT	Fracture of upper limb	16.2.3	Trauma membre supérieur	Trauma	Exeat	1							23
RASOARINAIVO Mathilde		1		39	AR	Ménagère	Tsaramandroso	Taxi	2011-04-22	1899-12-31 21:30:00	2011-04-22	1899-12-31 23:00:00	Trauma/AC	Contusion bénigne de l'avant-bras droit /AC	Superficial injury; contusion	16.8	Simple contusion	Trauma	Exeat	1								39
VELOMISY	1			19	AR	Receveur	Mangarivotra	Taxi	2011-04-23	1899-12-31 12:45:00	2011-04-23	1899-12-31 17:50:00	Trauma/AC	Simple contusion et écorchures du MID	Superficial injury; contusion	16.8	Simple contusion	Trauma	Exeat	1							19
LALAONIRINA Philomène		1		33	AR	Vendeur	Tsararano ambany	Taxi	2011-04-23	1899-12-31 22:35:00	2011-04-24	1899-12-31 08:00:00	TS/Nivaquine 10cp	IMV / 10cpNivaquine	Poisoning by other medications and drugs	16.11.2	Toxicologie	Intoxication	Exeat	1								33
RAKOTOARISOA Hasina	1			31	AR	Enseignant	Antanimalandy	Taxi	2011-04-25	1899-12-31 16:58:00	2011-04-25	1899-12-31 20:10:00	Trauma crânien/AC	Plaies multiples crânio-faciale et des membres	Open wounds	16.6	Plaies multiples	Trauma	Exeat	1							31
RAKOTOMANGA Victor	1			40	VR (CSB Mahabibo)	Maçon	Ambondrona	Taxi	2011-04-25	1899-12-31 21:45:00	2011-04-25	1899-12-31 23:30:00	Trauma crânien/AC	Ecorchures faciales multiples	Superficial injury; contusion	16.8	Trauma facial	Trauma	Exeat	1							40
RAFANOMEZANTSOA François	1			29	AR	Artisan	Sotema	Taxi	2011-04-25	1899-12-31 15:40:00	2011-04-25	1899-12-31 17:20:00	Trauma crânien /ARC	Plaie temporo-pariétale gauche/ARC	Open wounds of head; neck; and trunk	16.6.1	Trauma crânien bénin	Trauma	Exeat	1							29
RAKOTOARIVELO Justin	1			49	VR (CSB Mahabibo)	Charpentier	Amborovy	Taxi	2011-04-25	1899-12-31 21:15:00	2011-04-25	1899-12-31 23:30:00	Trauma crânien/AC	Plaie sus-orbitaire droite/AC	Open wounds of head; neck; and trunk	16.6.1	Trauma facial	Trauma	Exeat	1							49
JACQUELINE		1		53	AR	Vendeur	Tsararano Nosikely	Taxi	2011-04-26	1899-12-31 08:15:00	2011-04-26	1899-12-31 10:00:00	Trauma/AC	Multiples écorchures	Superficial injury; contusion	16.8	Multiples écorchures	Trauma	Exeat	1								53
SAID Soalihy	1			25	AR	Etudiant	Ambohimandamina	Taxi	2011-04-26	1899-12-31 01:00:00	2011-04-26	1899-12-31 07:15:00	Douleur de l'hémithorax gauche	Dystonie neuro-végétative	Somatoform disorders	5.15.7	Pathologie neuro-psy	Neurologic	Exeat	1							25
RAKOTONJANAHARY Hantarisoa Elisa		1		32	AR	Femme de chambre	Majunga be	Taxi	2011-04-27	1899-12-31 10:50:00	2011-04-27	1899-12-31 18:30:00	Perte de connaissance	Dystonie neuro-végétative	Somatoform disorders	5.15.7	Pathologie neuro-psy	Neurologic	Exeat	1								32
OLIARISOA		1		19	VRP (Méd libre)	?	Tsaramandroso	Taxi	2011-04-28	1899-12-31 20:00:00	2011-04-29	1899-12-31 12:30:00	TS	IMV /théophilline	Poisoning by other medications and drugs	16.11.2	Toxicologie	Intoxication	Exeat	1								19
RAZANADRAIBE Alexis	1			23	AR	Coiffeur	Antanimasaja	Taxi	2011-04-29	1899-12-31 20:00:00	2011-04-29	1899-12-31 23:50:00	Trauma thoraco-abdominal/AC	Contusion abdominale	Superficial injury; contusion	16.8	Simple contusion	Trauma	Exeat	1							23
ANDRIAMAHARAVO Emile	1			28	AR	Policier	Majunga be	Taxi	2011-04-29	1899-12-31 22:00:00	2011-04-29	1899-12-31 23:50:00	Trauma crânien/AC	Plaie de l'angle inféro-interne de l'orbite gauche/AC	Open wounds of head; neck; and trunk	16.6.1	Trauma facial	Trauma	Exeat	1							28
NDREFANA Ginah		1		17	VR (CSB Sotema)	Garagiste	Tanambao Sotema	Taxi	2011-04-30	1899-12-31 00:25:00	2011-04-30	1899-12-31 09:00:00	Douleur abdominale aiguë	Intoxication alimentaire	intestinal infection	9.1	Pathologie digestive	Gastrointestinal	Exeat	1								17
RAZAKAHARISOA Daniel	1			16	AR	Ecolier	Amborovy	Taxi	2011-04-30	1899-12-31 09:30:00	2011-04-30	1899-12-31 10:30:00	Trauma /AC	Plaie linéiaire du tendon d'Achille/AC	Open wounds of extremities	16.6.2	Trauma membre inférieur	Trauma	Exeat	1							16
SOAFIAVY	1			21	AR	Tireur de pousse-pousse	Tanambao Ambalavato	Taxi	2011-05-01	1899-12-31 22:50:00	2011-05-02	1899-12-31 02:30:00	Trauma facial / ARC	Trauma facial / ARC	injury and poisoning	16	Trauma facial	Trauma	Exeat	1							21
BOTO André	1			36	VR (CSB Tsararano)	Tôlier	Tsararano ambony	Taxi	2011-05-01	1899-12-31 23:40:00	2011-05-02	1899-12-31 02:45:00	Trauma facial / ARC	Plaie fronto-temporale droite et de la région labiale droite	Open wounds of head; neck; and trunk	16.6.1	Trauma facial	Trauma	Exeat	1							36
RAHOLINIRINA Philbertine		1		47	AR	Manœuvre	Tsaramandroso	Taxi	2011-05-02	1899-12-31 18:30:00	2011-05-02	1899-12-31 20:10:00	Trauma/AC	Contusion de l'épaule G/AC	Superficial injury; contusion	16.8	Trauma membre supérieur	Trauma	Exeat	1								47
FAHED	1			17	AR	?	Aranta	Taxi	2011-05-03	1899-12-31 23:50:00	2011-05-04	1899-12-31 08:00:00	TS /bière +vetsin	TS /bière +vetsin	poisoning by nonmedicinal substances	16.11.3	Toxicologie	Intoxication	Exeat	1							17
SYLVIA		1		33	AR	Vendeur	Tsararano Nosikely	Taxi	2011-05-04	1899-12-31 01:10:00	2011-05-04	1899-12-31 08:20:00	TS / alcool +détartrant de carreaux	TS / alcool +détartrant de carreaux	poisoning by nonmedicinal substances	16.11.3	Toxicologie	Intoxication	Exeat	1								33
RAZAFIARIMANANA Hasmine			1	2	AR	Ecolier	Aranta	Taxi	2011-05-06	1899-12-31 15:05:00	2011-05-06	1899-12-31 17:00:00	Trauma/AC	Multiples écorchures/AC	Superficial injury; contusion	16.8	Multiples écorchures	Trauma	Exeat	1									2
NAMBININTSOA Sitraka	1			20	AR	Vendeur	Tsaramandroso	Taxi	2011-05-07	1899-12-31 07:18:00	2011-05-07	1899-12-31 08:15:00	Trauma crânien /AD	Plaie linéaire simple/AD	Open wounds of extremities	16.6.2	Trauma drânien bénin	Trauma	Exeat	1							20
MIARANTSOA		1		36	AR	Animatrice	Mampikony	Taxi	2011-05-07	1899-12-31 01:30:00	2011-05-07	1899-12-31 08:30:00	Céphalées	Crises convulsives partielles	convulsions	6.4.2	Pathologie neuro-psy	Neurologic	Exeat	1								36
RAKOTONDRAZANANY Jean Martin	1			46	AR	Chauffeur	Antananarivo	Taxi	2011-05-07	1899-12-31 18:00:00	2011-05-09	1899-12-31 08:30:00	Piqûre d'insecte	Hypocalcémie	Fluid and electrolyte disorders	3.8	Pathologie métabolique	Endocrine	Exeat	1							46
ZARANOMENA Tsiresilaza Prudence	1			17	AR	Etudiant	Tsararano ambany	Taxi	2011-05-09	1899-12-31 07:10:00	2011-05-09	1899-12-31 12:00:00	Perte de connaissance	Dystonie neuro-végétative	Somatoform disorders	5.15.7	Pathologie neuro-psy	Neurologic	Exeat	1							17
ANTILAHY Denis	1			54	VRP (Méd libre)	Asistant d'administration	Antanimalandy	Taxi	2011-05-12	1899-12-31 22:15:00	2011-05-13	1899-12-31 08:00:00	Intoxication /ingestion de poissons	ICAM	Poisoning	16.11	Toxicologie	Intoxication	Exeat	1							54
ALBERTINE		1		39	VR (CSB Sotema)	Vendeuse	Ambohimandamina	Taxi	2011-05-12	1899-12-31 18:00:00	2011-05-13	1899-12-31 08:00:00	Intoxication /ingestion de poissons	ICAM	Poisoning	16.11	Toxicologie	Intoxication	Exeat	1								39
RAVONIARIMANGA Jeannine		1		35	VRP (Méd libre)	Ménagère	Antanimalandy	Taxi	2011-05-12	1899-12-31 22:10:00	2011-05-13	1899-12-31 08:00:00	Intoxication /ingestion de poissons	ICAM	Poisoning	16.11	Toxicologie	Intoxication	Exeat	1								35
ELIANE		1		20	VR (CSB Sotema)	Ménagère	Ambohimandamina	Taxi	2011-05-12	1899-12-31 18:00:00	2011-05-13	1899-12-31 08:00:00	Intoxication /ingestion de poissons	ICAM	Poisoning	16.11	Toxicologie	Intoxication	Exeat	1								20
SALOUM Stève Elysé	1			23	AR	Boucher	Belobaka	Taxi	2011-05-13	1899-12-31 14:30:00	2011-05-13	1899-12-31 18:10:00	Trauma/AC	Multiples écorchures/AC	Superficial injury; contusion	16.8	Multiples écorchures	Trauma	Exeat	1							23
TOTO Manokana Damy	1			28	AR	Etudiant	Ambondrona	Taxi	2011-05-13	1899-12-31 19:05:00	2011-05-14	1899-12-31 08:00:00	Hyperthermie	Typho-malaria	Other gram negative septicemia	1.1.2.4	Pathologie infectieuse	Infectious Disease	Exeat	1							28
HOUSNI Moubarak	1			27	AR	Ingénieur	Mahavoky avaratra	Taxi	2011-05-14	1899-12-31 13:05:00	2011-05-14	1899-12-31 14:55:00	Traumatisme de l'épaule G/AC	simple contusion de l'épaule gauche/AC	Superficial injury; contusion	16.8	Trauma membre supérieur	Trauma	Exeat	1							27
RAMANANMPAMONJY Mariette		1		68	VR (CSB Amborovy)	Ménagère	Belinta	Taxi	2011-05-15	1899-12-31 17:48:00	2011-05-15	1899-12-31 20:30:00	Douleur aiguë de l'abdomen	Suspicion d'intoxication alimentaire	intestinal infection	9.1	Pathologie digestive	Gastrointestinal	Exeat	1								68
RAZAFINDRAZANA Emilie Victoire		1		29	AR	Ménagère	Manjarisoa	Taxi	2011-05-15	1899-12-31 03:00:00	2011-05-15	1899-12-31 08:00:00	Trauma crânio-facial/ARC	Contusion maxillo-faciale et cervicale /ARC	Superficial injury; contusion	16.8	Trauma crânio-facial	Trauma	Exeat	1								29
ZAFIZARA Justine		1		71	AR	Couturière	Mahavoky avaratra	Taxi	2011-05-15	1899-12-31 08:45:00	2011-05-16	1899-12-31 08:00:00	AEG	Dénutrition	Nutritional deficiencies	3.5	Pathologie métabolique	Endocrine	Exeat	1								71
ISSOUF	1			26	AR	?	Ambovoalanana	Taxi	2011-05-16	1899-12-31 11:20:00	2011-05-16	1899-12-31 15:20:00	Perte de connaissance	Coma éthylique	Alcohol-related disorders	5.11	Toxicologie	Intoxication	Exeat	1							26
RAIJA Zanie Lynda		1		26	AR	Etudiant	Tsararano	Taxi	2011-05-19	1899-12-31 21:45:00	2011-05-19	1899-12-31 23:45:00	Vertiges +essoufflement	Dystonie neuro-végétative	Somatoform disorders	5.15.7	Pathologie neuro-psy	Neurologic	Exeat	1								26
RAKOTOARISOA Fanomezantsoa Florent	1			21	AR	Vendeur	Mahabibokely	Taxi	2011-05-19	1899-12-31	2011-05-20	1899-12-31 08:00:00	Trauma crânien +état d'ivresse	Trauma crânien bénin /ARC	Intracranial injury	16.4	Trauma crânien bénin	Trauma	Exeat	1							21
ZARAMAMY Louise		1		28	AR	Ménagère	Tsaramandroso	Taxi	2011-05-19	1899-12-31 19:30:00	2011-05-20	1899-12-31 08:00:00	Crise émotionnelle +douleur thoracique	Dystonie neuro-végétative	Somatoform disorders	5.15.7	Pathologie neuro-psy	Neurologic	Exeat	1								28
RAFALINJATOVO Grégoire	1			40	AR	Transporteur	Amborovy	Taxi	2011-05-20	1899-12-31 08:00:00	2011-05-21	1899-12-31 10:00:00	Crises convulsives généralisées apyrétiques	Intoxication alimentaire	intestinal infection	9.1	Pathologie digestive	Gastrointestinal	Exeat	1							40
RAZAFINDRAVELO Perline Berthine		1		39	AR	Ménagère	Ambondrona	Taxi	2011-05-20	1899-12-31 09:30:00	2011-05-22	1899-12-31 08:00:00	Perte de connaissance	Infection génitale	Sexually transmitted infections (not HIV or hepatitis)	1.1.3	Pathologie infectieuse	Infectious Disease	Exeat	1								39
LALANIAINA Lanto Odette		1		30	AR	?	Mahavoky atsimo	Taxi	2011-05-21	1899-12-31 14:40:00	2011-05-21	1899-12-31 21:30:00	Douleur abdominale aiguë	Intolérance médicamenteuse antiparasitaire + kyste fonctionnelle de l'ovaire D	allergic reactions	17.1.9	Pathologie digestive	Gastrointestinal	Exeat	1	1							30
MOHAMED Rachid	1			24	VR (CSB Mahabibo)	Foot-balleur	Manga	Taxi	2011-05-22	1899-12-31 13:45:00	2011-05-22	1899-12-31 14:15:00	Intoxication alcoolique + vomissement	Intoxication alcoolique	Alcohol-related disorders	5.11	Toxicologie	Intoxication	Exeat	1							24
MANJOVALA	1			80	AR	?	Ambalamanga	Taxi	2011-05-23	1899-12-31 08:05:00	2011-05-23	1899-12-31 16:40:00	Trauma crânien/AC	Trauma crânien bénin +écorchures	Intracranial injury	16.4	Trauma crânien bénin	Trauma	Exeat	1							80
NDRIANASY Niaina	1			16	AR	Ecolier	Mangarivotra	Taxi	2011-05-23	1899-12-31 14:25:00	2011-05-23	1899-12-31 18:50:00	Traumatisme du bassin et de l'avant-bras gauche/AC	Simple contusion du bassin/AC	Superficial injury; contusion	16.8	Simple contusion	Trauma	Exeat	1							16
ANDRIAMIARISOA Miary		1		49	AR	Ménagère	Mahavoky avaratra	Taxi	2011-05-23	1899-12-31 14:25:00	2011-05-23	1899-12-31 18:50:00	Traumatisme lombo-sacré/AC	Contusion lombo-sacrée/AC	Superficial injury; contusion	16.8	Simple contusion	Trauma	Exeat	1								49
NOMENJANAHARY Florida		1		22	AR	Secrétaire	Mahatsinjo	Taxi	2011-05-24	1899-12-31 08:05:00	2011-05-24	1899-12-31 10:30:00	Perte de connaissance	Dystonie neuro-végétative	Somatoform disorders	5.15.7	Pathologie neuro-psy	Neurologic	Exeat	1								22
RAVALISOA Noellah		1		23	VR (CSB Mahabibo)	Etudiant	Andovinjo	Taxi	2011-05-25	1899-12-31 00:15:00	2011-05-25	1899-12-31 09:00:00	TS/14cp de chloroquine	IMV/14cp de chloroquine	Poisoning by other medications and drugs	16.11.2	Toxicologie	Intoxication	Exeat	1								23
MAEVALAZA Jean Baptiste	1			41	AR	Electricien	Tsaramandroso	Taxi	2011-05-25	1899-12-31 16:30:00	2011-05-26	1899-12-31 11:30:00	Trauma crânien/AC	Multiples éorchures + trauma crânien bénin	Superficial injury; contusion	16.8	Trauma crânien bénin	Trauma	Exeat	1							41
MOÏNA		1		39	AR	?	Mahavoky avaratra	Taxi	2011-05-25	1899-12-31 15:30:00	2011-05-26	1899-12-31 17:30:00	Trauma crânien/AC	Contusion lombaire + trauma crânien bénin	Superficial injury; contusion	16.8	Trauma crânien bénin	Trauma	Exeat	1								39
RAJAONIBE Zafimamonjy	1			46	AR	Marin	Terrain mena	Taxi	2011-05-26	1899-12-31 12:30:00	2011-05-26	1899-12-31 18:00:00	Trauma crânio-facial/AC	Plaie sus-orbitaire D+Trauma crânien bénin	Open wounds of head; neck; and trunk	16.6.1	Trauma crânio-facial bénin	Trauma	Exeat	1							46
RINAH Rassone		1		33	AR	Collecteur	Manjarisoa	Taxi	2011-05-26	1899-12-31 12:30:00	2011-05-26	1899-12-31 16:20:00	Trauma crânien/AC	Plaie du genou G et de la jambe droite + trauma crânien bénin	Open wounds of extremities	16.6.2	Trauma crânien bénin	Trauma	Exeat	1								33
FANOMEZANTSOA Norine			1	3	VR (CSB Antanimasaja)	Ecolier	Mahatsinjo	Taxi	2011-05-26	1899-12-31 18:55:00	2011-05-26	1899-12-31 21:30:00	Plaie de la main gauche/AD	Plaie du 4e doigt de la main Gauche/AD	Open wounds of extremities	16.6.2	Trauma membre supérieur	Trauma	Exeat	1									3
ZAFIMANANA		1		39	AR	Cultivateur	Ambalabe Befanjava	Taxi	2011-05-27	1899-12-31 22:00:00	2011-05-27	1899-12-31 23:47:00	Trauma/AC	Trauma dorso-lombaire bénin	injury and poisoning	16	Simple contusion	Trauma	Exeat	1								39
JEAN Pierre	1			30	AR	Tireur de pousse-pousse	Mahavoky avaratra	Taxi	2011-05-27	1899-12-31 18:30:00	2011-05-27	1899-12-31 20:00:00	Trauma de la hanche /AC	Contusion simple de la hanche	Superficial injury; contusion	16.8	Simple contusion	Trauma	Exeat	1							30
FREDO	1			18	VR (CSB Mahabibo)	Docker	Tsararano	Taxi	2011-05-27	1899-12-31 16:00:00	2011-05-28	1899-12-31 07:00:00	Vomissements+diarrhées+douleur abdominale	Intoxication alimentaire /poissons d'eau douce avariées	intestinal infection	9.1	Pathologie infectieuse	Infectious Disease	Exeat	1							18
RAKOTOARISOA Jean Julien	1			20	AR	Pêcheur	Mahatsinjo	Taxi	2011-05-27	1899-12-31 23:00:00	2011-05-28	1899-12-31 08:15:00	Plaie temporo-frontale droite/ARC	Plaie temporo-frontale droite/ARC	Open wounds of head; neck; and trunk	16.6.1	Trauma crânien	Trauma	Exeat	1							20
RAKOTOMALALA Andrianina	1			34	VRP (Méd libre)	Marin	Majunga be	Taxi	2011-05-27	1899-12-31 16:38:00	2011-05-28	1899-12-31 09:30:00	Malaise + perte de connaissance	Hémorragie digestive	Gastrointestinal hemorrhage	9.10.0	Pathologie digestive	Gastrointestinal	Exeat	1							34
RAKOTOZANANY Grégoire	1			43	VR (CSB Mahavoky)	?	Mahavoky atsimo	Taxi	2011-05-28	1899-12-31 05:27:00	2011-05-28	1899-12-31 10:00:00	Trauma /ARC	Plaies multiples/ARC	Open wounds	16.6	Plaies multiples	Trauma	Exeat	1							43
CHAPA	1			21	AR	Tireur de pousse-pousse	Tsararano	Taxi	2011-05-29	1899-12-31 18:50:00	2011-05-29	1899-12-31 21:00:00	Trauma/AC	Plaies multiples/AC	Open wounds	16.6	Plaies multiples	Trauma	Exeat	1							21
JOSE Alain	1			35	AR	Boucher	Mahatsinjo	Taxi	2011-05-29	1899-12-31 12:42:00	2011-05-29	1899-12-31 17:00:00	Trauma/AC	Simple contusion	Superficial injury; contusion	16.8	Simple contusion	Trauma	Exeat	1							35
ALAWIA		1		18	AR	Ménagère	Tsararano	Taxi	2011-05-29	1899-12-31 13:00:00	2011-05-29	1899-12-31 19:15:00	Douleur lombaire /ARC	Simple contusion	Superficial injury; contusion	16.8	Simple contusion	Trauma	Exeat	1								18
BARISOLO		1		30	AR	Vendeur	?	Taxi	2011-05-29	1899-12-31 18:30:00	2011-05-29	1899-12-31 19:30:00	Trauma/AC	Contusion de l'épaule droite/AC	Superficial injury; contusion	16.8	Trauma membre supérieur	Trauma	Exeat	1								30
RAZAFIDRATSIMBA Roland	1			23	AR	Vendeur	Sotema	Taxi	2011-05-29	1899-12-31 18:30:00	2011-05-29	1899-12-31 19:30:00	Trauma/AC	Plaie palpébrale droite/Ac	Open wounds of head; neck; and trunk	16.6.1	Trauma facial	Trauma	Exeat	1							23
VOLATIANA Michella		1		16	AR	?	Tsararano	Taxi	2011-05-29	1899-12-31 12:20:00	2011-05-30	1899-12-31 09:30:00	TS	IMV/14cp de chloroquine	Poisoning by other medications and drugs	16.11.2	Toxicologie	Intoxication	Exeat	1								16
SALIM Houssen	1			25	AR	Vendeur	Morafeno	Taxi	2011-05-30	1899-12-31 21:40:00	2011-05-30	1899-12-31 22:30:00	Plaie temporo-frontale gauche/ARC	Plaie temporo-frontale gauche/ARC	Open wounds of head; neck; and trunk	16.6.1	Trauma crânien bénin	Trauma	Exeat	1							25
FANOMEZANTSOA Fetra	1			58	VRP (Méd libre)	Ouvrier	Ambondrona	Taxi	2011-05-31	1899-12-31 11:05:00	2011-05-31	1899-12-31 14:00:00	Trauma crânien	Trauma crânien bénin	Intracranial injury	16.4	Trauma crânien bénin	Trauma	Exeat	1							58
FANAMBINANA Isaia	1			20	VR (CSB Sotema)	?	Tanambao Sotema	Taxi	2011-05-31	1899-12-31 07:00:00	2011-05-31	1899-12-31 09:20:00	Plaie labiale et main droite/chute	Plaie labiale et main droite/chute	Open wounds of extremities	16.6.2	Trauma facial	Trauma	Exeat	1							20
MARIE Michèle		1		16	VRP (Méd libre)	Ecolier	Mahavoky atsimo	Taxi	2011-05-31	1899-12-31 17:00:00	2011-06-01	1899-12-31 07:00:00	Crise de tétanie	Dystonie neuro-végétative	Somatoform disorders	5.15.7	Pathologie neuro-psy	Neurologic	Exeat	1								16
REMI Ali Pierre	1			29	AR	Maçon	Antanimasaja	Taxi	2011-06-01	1899-12-31 21:44:00	2011-06-01	1899-12-31 23:30:00	Trauma/AC	Trauma facial/AC	injury and poisoning	16	Trauma facial bénin	Trauma	Exeat	1							29
ANDRIATSALAMA Jules	1			54	AR	Musicien	Ambohimandamina	Taxi	2011-06-01	1899-12-31 10:10:00	2011-06-01	1899-12-31 11:15:00	Luxation mandibulaire	Luxation mandibulaire	Joint disorders and dislocations; trauma-related	16.1	Urgence ORLO	Trauma	Exeat	1							54
RANDRIANARIMANANA Christina		1		17	AR	Etudiant	Mahavoky	Taxi	2011-06-04	1899-12-31 20:05:00	2011-06-05	1899-12-31 14:00:00	Perte de connaissance	Spasmophilie	somatoform disorders	5.15.7	Pathologie neuro-psy	Neurologic	Exeat	1								17
SONIA		1		11	VR (CSB Mahabibo)	Ecolier	Mahavoky avaratra	Taxi	2011-06-06	1899-12-31 12:00:00	2011-06-06	1899-12-31 15:30:00	Perte de connaissance	Hypoglycémie	Endocrine; nutritional; and metabolic diseases and immunity disorders	3	Pathologie endocrinienne	Endocrine	Exeat	1								11
MARIE ROSE		1		23	AR	Etudiant	?	Taxi	2011-06-06	1899-12-31 18:20:00	2011-06-06	1899-12-31 21:35:00	Asthénie	Hypocalcémie probable	Fluid and electrolyte disorders	3.8	Pathologie endocrinienne	Endocrine	Exeat	1								23
JEAN HONORE	1			61	AR	Pêcheur	Mahatsinjo	Taxi	2011-06-06	1899-12-31 08:25:00	2011-06-06	1899-12-31 15:00:00	Perte de connaissance	Coma éthylique	Alcohol-related disorders	5.11	Toxicologie	Intoxication	Exeat	1							61
JEAN CLAUDE			1	8	AR	Ecolier	Tsararano	Taxi	2011-06-07	1899-12-31 08:00:00	2011-06-07	1899-12-31 17:00:00	Trauma /AC	Trauma crânien bénin/AC	Intracranial injury	16.4	Trauma crânien bénin	Trauma	Exeat	1									8
JOSOA	1			25	AR	Charpentier	Camp militaire	Taxi	2011-06-07	1899-12-31 08:35:00	2011-06-07	1899-12-31 12:10:00	Plaies traumatiques/AC	Multiples écorchures/AC	Superficial injury; contusion	16.8	Multiples écorchures	Trauma	Exeat	1							25
RAZAFINDRASOA Alex Ford Sorea			1	12	AR	Ecolier	Aranta	Taxi	2011-06-07	1899-12-31 02:40:00	2011-06-07	1899-12-31 05:00:00	Plaie faciale (naevus)	Plaie faciale/AD	Open wounds of head; neck; and trunk	16.6.1	Trauma facial bénin	Trauma	Exeat	1									12
RAKOTONIRINA Herimanantsoa Joël	1			20	VR (Salfa)	Etudiant	Mahatsinjo	Taxi	2011-06-08	1899-12-31 19:00:00	2011-06-08	1899-12-31 20:00:00	Vomissement+céphalées post trauma crânien/chute	Simple contusion	Superficial injury; contusion	16.8	Simple contusion	Trauma	Exeat	1							20
RATAFIKA Andrianjaka Rija	1			27	VRP (Méd libre)	?	Tsaramandroso	Taxi	2011-06-08	1899-12-31 11:54:00	2011-06-08	1899-12-31 13:00:00	Trauma de la pulpe du pouce par arme blanche	Plaie de la pulpe du pouce droit par arme blanche/AD	Open wounds of extremities	16.6.2	Trauma membre supérieur	Trauma	Exeat	1							27
RAVAOMARIA Françoise		1		50	VR (CSB Sotema)	?	Antanimalandy	Taxi	2011-06-09	1899-12-31 16:20:00	2011-06-10	1899-12-31 11:20:00	Coma éthylique	Coma éthylique	Alcohol-related disorders	5.11	Toxicologie	Intoxication	Exeat	1								50
HORTENSIA			1	5	AR	Ecolier	Antsahavaky	Taxi	2011-06-11	1899-12-31 21:00:00	2011-06-11	1899-12-31 23:00:00	Trauma/AC	Simples écorchures	Superficial injury; contusion	16.8	Simples écorchures	Trauma	Exeat	1									5
RANELSON Fenomanana Richard	1			19	AR	?	Tsararano	Taxi	2011-06-11	1899-12-31 00:20:00	2011-06-11	1899-12-31 11:00:00	Trauma/ARC	Plaie sous-scapulaire gauchepar queue de Makoba(ARC)	Open wounds of head; neck; and trunk	16.6.1	Trauma membre supérieur	Trauma	Exeat	1							19
TAHIANJANAHARY René	1			10	AR	Ecolier	Mahavoky avaratra	Taxi	2011-06-11	1899-12-31 16:50:00	2011-06-11	1899-12-31 17:30:00	Plaie /ARC	Plaie frontale/ARC	Open wounds of head; neck; and trunk	16.6.1	Trauma crânien bénin	Trauma	Exeat	1							10
RAMAHAZOKY Philibert Magloire	1			50	VR (CSB Mahavoky)	Machiniste	Tsaramandroso ambany	Taxi	2011-06-11	1899-12-31 13:55:00	2011-06-11	1899-12-31 19:05:00	Dyspnée + vomissement	DNV,malade hypocondriaque	Somatoform disorders	5.15.7	Pathologie neuro-psy	Neurologic	Exeat	1							50
RAKOTOSON Lalatiana Christophe Kevin			1	2.5	AR		Tsaramandroso	Taxi	2011-06-12	1899-12-31 08:00:00	2011-06-12	1899-12-31 08:00:00	Trauma/AC	Trauma minime du bras droit	injury and poisoning	16	Trauma membre supérieur	Trauma	Exeat	1									2.5
ANNITA		1		16	AR	?	Tsararano	Taxi	2011-06-12	1899-12-31 00:45:00	2011-06-12	1899-12-31 09:00:00	Douleur abdominale /Arc	Simple contusion	Superficial injury; contusion	16.8	Simple contusion	Trauma	Exeat	1								16
ANDRIAMASO Elie	1			17	VR (CSB Sotema)	Etudiant	Ambohimandamina	Taxi	2011-06-13	1899-12-31 01:15:00	2011-06-13	1899-12-31 09:30:00	Trauma crânien/ARC	Trauma crânien bénin /ARC	Intracranial injury	16.4	Trauma crânien bénin	Trauma	Exeat	1							17
RAKOTOARISOA Doris		1		18	AR	?	?	Taxi	2011-06-15	1899-12-31 14:45:00	2011-06-16	1899-12-31 09:00:00	TS/Alcool + vetsin	TS/Alcool + vetsin	poisoning by nonmedicinal substances	16.11.3	Toxicologie	Intoxication	Exeat	1								18
VELOLALAINA			1	8	AR	Ecolier	Betamanga	Taxi	2011-06-18	1899-12-31 12:30:00	2011-06-18	1899-12-31 15:00:00	Trauma /AC	Plaies multiplessimples	Open wounds	16.6	Plaies multiples	Trauma	Exeat	1									8
RABELAZA Ernest	1			80	VR (CSB Mahabibo)	Policier	Fiofio	Taxi	2011-06-18	1899-12-31 14:00:00	2011-06-19	1899-12-31 08:00:00	Gastro-entérite	Intolérance alimentaire	intestinal infection	9.1	Pathologie digestive	Gastrointestinal	Exeat	1							80
DIMBINIAINA Rado	1			26	AR	?	?	Taxi	2011-06-19	1899-12-31 19:30:00	2011-06-19	1899-12-31 21:15:00	Trauma /AC	Subluxation de l'épaule droite/AC	Joint disorders and dislocations; trauma-related	16.1	Trauma membre supérieur	Trauma	Exeat	1							26
RAHARIFIAKARANA Teddy Marion	1			23	AR	Ecolier	Tsararano ambony	Taxi	2011-06-19	1899-12-31 16:22:00	2011-06-19	1899-12-31 18:10:00	Trauma /AC	Simples écorchures de l'omoplate	Superficial injury; contusion	16.8	Simples écorchures	Trauma	Exeat	1							23
TSITOHERY Christian	1			22	AR	Etudiant	Antanimalandy	Taxi	2011-06-19	1899-12-31 11:35:00	2011-06-21	1899-12-31 15:00:00	Trauma/Ac	Multiples écorchures/AC	Superficial injury; contusion	16.8	Multiples écorchures	Trauma	Exeat	1							22
JOEL	1			36	VR (CSB Mahabibo)	Menuisier	Tsaramandroso	Taxi	2011-06-21	1899-12-31 08:45:00	2011-06-21	1899-12-31 11:30:00	Trauma du doigt/AT	Plaie de l'index de la main droiteAT	Open wounds of extremities	16.6.2	Trauma membre supérieur	Trauma	Exeat	1							36
RAKOTONOMENJANAHARY François	1			40	VR (CHD Mampikony)	Commerçant	Mampikony	Taxi	2011-06-22	1899-12-31 16:20:00	2011-06-22	1899-12-31 18:00:00	Trauma crânien/ARC	Trauma crânien +douleur thoracique	Intracranial injury	16.4	Trauma crânien	Trauma	Exeat	1							40
VELO Jacques Bruno	1			25	AR	Décodeur de tél mobile	Tsararano	Taxi	2011-06-22	1899-12-31 12:58:00	2011-06-22	1899-12-31 14:15:00	Trauma/ARC	Plaie labiale et contusion faciale	Open wounds of extremities	16.6.2	Trauma facial bénin	Trauma	Exeat	1							25
MAMISOA Solange		1		17	AR	Ecolier	Manjarisoa	Taxi	2011-06-22	1899-12-31 19:30:00	2011-06-23	1899-12-31 08:30:00	Vertiges+ vomissement	FT+DNV	Other gram negative septicemia	1.1.2.4	Pathologie infectieuse	Infectious Disease	Exeat	1								17
TOTONIFANDRO N. Dorel	1			23	AR	Etudiant	Ambondrona	Taxi	2011-06-23	1899-12-31 19:00:00	2011-06-24	1899-12-31 07:30:00	Crises convulsives	Crise épileptique	Epilepsy	6.4.1	Pathologie neuro-psy	Neurologic	Exeat	1							23
HENRY			1	13	AR	Ecolier	Tsararano	Taxi	2011-06-24	1899-12-31 20:45:00	2011-06-24	1899-12-31 23:00:00	Fracture double de l'avant-bras/chute	Fracture fermée des 2 os de l'avant-bras/chute	Fracture of radius and ulna	16.2.3.2	Trauma membre supérieur	Trauma	Exeat	1									13
JEAN NOEL	1			34	AR	?	?	Taxi	2011-06-24	1899-12-31 23:45:00	2011-06-25	1899-12-31 07:00:00	Trauma/ARC	Trauma crânien/ARC	Intracranial injury	16.4	Trauma crânien bénin	Trauma	Exeat	1							34
RAKOTOARISOA Jean Louis	1			42	AR	Commerçant	Mahatsinjo	Taxi	2011-06-25	1899-12-31 03:30:00	2011-06-25	1899-12-31 09:30:00	Trauma /AC	Contusion thoracique	Superficial injury; contusion	16.8	Trauma thoracique	Trauma	Exeat	1							42
NIRINA Jacquie		1		19	AR	Etudiant	Ambalanomby	Taxi	2011-06-25	1899-12-31 10:00:00	2011-06-25	1899-12-31 17:00:00	TS/20 cp de nivaquine	IMV/20cp de nivaquine	Poisoning by other medications and drugs	16.11.2	Toxicologie	Intoxication	Exeat	1								19
AIME Gaston	1			10	VR (CSB Mahavoky)	Ecolier	Mahavoky atsimo	Taxi	2011-06-25	1899-12-31 12:51:00	2011-06-25	1899-12-31 13:41:00	Traumatisme des bourses	Plaie des bourses/chute	Open wounds of extremities	16.6.2	Trauma génito-urinaire	Trauma	Exeat	1							10
RAJAONINA Faniriantsoa Antonio			1	13	AR	Ecolier	Antanimalandy	Taxi	2011-06-25	1899-12-31 22:00:00	2011-06-26	1899-12-31 01:00:00	Trauma /AC	Contusion du genou gauche + multiples écorchures/AC	Superficial injury; contusion	16.8	Trauma membre inférieur	Trauma	Exeat	1									13
RAMANANJAHANRY Lalasoa André	1			43	AR	Pêcheur	Aranta	Taxi	2011-06-25	1899-12-31 22:40:00	2011-06-26	1899-12-31 00:50:00	Trauma/ARC	Plaie frontale/ARC	Open wounds of head; neck; and trunk	16.6.1	Trauma crânien bénin	Trauma	Exeat	1							43
RAKOTOARISOA Jean Chris	1			27	AR	Plongeur	Ambalavola	Taxi	2011-06-26	1899-12-31 14:10:00	2011-06-27	1899-12-31 15:15:00	Trauma /AC	Plaie labiale supérieure + avulsion dentaire	Open wounds of extremities	16.6.2	Trauma facial bénin	Trauma	Exeat	1							27
SOLO	1			31	AR	?	Tsararano	Taxi	2011-06-27	1899-12-31 19:30:00	2011-06-27	1899-12-31 23:10:00	Trauma /AC	Trauma crânio-facial/AC	Intracranial injury	16.4	Trauma crânio-facial	Trauma	Exeat	1							31
TSILAVINA Odon	1			25	AR	Vendeur	Tsaramandroso	Taxi	2011-06-27	1899-12-31 03:00:00	2011-06-27	1899-12-31 04:15:00	Trauma crânien/ARC	Plaie pariétale/ARC	Open wounds of head; neck; and trunk	16.6.1	Trauma crânien bénin	Trauma	Exeat	1							25
RAZARA Marie Louise		1		28	AR	Femme de chambre	La Corniche	Taxi	2011-06-27	1899-12-31 00:20:00	2011-06-27	1899-12-31 00:50:00	Trauma/ARC	Plaie labiale supérieure gauche/ARC	Open wounds of extremities	16.6.2	Trauma facial bénin	Trauma	Exeat	1								28
RAFARALAHY Hermann	1			33	AR	Gendarme	Mahavoky avaratra	Taxi	2011-06-27	1899-12-31 10:50:00	2011-06-27	1899-12-31 12:30:00	Trauma/arme blanche (AD)	Plaie fessière / arme blanche	Open wounds of extremities	16.6.2	Simple plaie	Trauma	Exeat	1							33
MARJORIE Mary		1		23	VRP (Méd libre)	?	La Corniche	Taxi	2011-06-27	1899-12-31 12:40:00	2011-06-27	1899-12-31 18:00:00	Asthénie physique + TA oscillante	Spasmophilie	somatoform disorders	5.15.7	Pathologie neuro-psy	Neurologic	Exeat	1								23
RABEMITOMBO Jocuel	1			21	AR	Ecolier	Mahavoky avaratra	Taxi	2011-06-27	1899-12-31 13:00:00	2011-06-28	1899-12-31 10:00:00	TS/raticide	TS/raticide	poisoning by nonmedicinal substances	16.11.3	Toxicologie	Intoxication	Exeat	1							21
RAKOTONDRABE Hermann Gabin	1			33	AR	Machiniste	Tsararano	Taxi	2011-07-01	1899-12-31 19:00:00	2011-07-02	1899-12-31 08:30:00	Trauma /arme blanche (ARC)	Plaie de l'avant-bras/arme blanche	Open wounds of extremities	16.6.2	Trauma membre supérieur	Trauma	Exeat	1							33
ANDRIANATREFINA Edson Marc Léonel	1			21	AR	Etudiant	Mahavoky	Taxi	2011-07-02	1899-12-31 13:20:00	2011-07-02	1899-12-31 14:40:00	Trauma/AC	Multiples écorchures	Superficial injury; contusion	16.8	Multiples écorchures	Trauma	Exeat	1							21
RASOAHARINIRNA Volatiana Angèle			1	14	VR (CSB Belobaka)	Ecolier	Belobaka	Taxi	2011-07-02	1899-12-31 14:35:00	2011-07-02	1899-12-31 18:00:00	Douleur FID	Dysménorrhée	Menstrual disorders	10.3.5	Pathologie génito-urinaire	Genitourinary	Exeat	1									14
PATOPH Armand	1			18	VR (CSB Sotema)	Puiseur d'eau	Amparihingidro	Taxi	2011-07-02	1899-12-31 19:00:00	2011-07-03	1899-12-31 07:00:00	TS/Alcool+Vetsin	TS/Alcool+Vetsin	poisoning by nonmedicinal substances	16.11.3	Toxicologie	Intoxication	Exeat	1							18
ZAFIVAVY		1		30	AR	Ménagère	Amborovy	Taxi	2011-07-03	1899-12-31 11:00:00	2011-07-03	1899-12-31 15:00:00	Trauma/AC	Multiples écorchures	Superficial injury; contusion	16.8	Multiples écorchures	Trauma	Exeat	1								30
LOÏC			1	13	VRP (SMIM)	?	?	Taxi	2011-07-03	1899-12-31 13:00:00	2011-07-03	1899-12-31 16:00:00	Trauma de l'avant-bras /chute	Fracture fermée du 1/3-< du radius G avec 3e fragment	Fracture of radius and ulna	16.2.3.2	Trauma membre supérieur	Trauma	Exeat	1									13
ANAÏCK Ornella			1	6	AR	Ecolier	Mangarivotra	Taxi	2011-07-03	1899-12-31 15:45:00	2011-07-04	1899-12-31 08:00:00	Trauma crânien /chute	Trauma crânien bénin	Intracranial injury	16.4	Trauma crânien bénin	Trauma	Exeat	1									6
RABEARINOSY Solofo	1			52	AR	Décortiqueur	Aranta	Taxi	2011-07-04	1899-12-31 01:30:00	2011-07-04	1899-12-31 07:00:00	Perte de connaissance	Hypoglycémie	Endocrine; nutritional; and metabolic diseases and immunity disorders	3	Pathologie métabolique	Endocrine	Exeat	1							52
RANDRIANASOAVINA Julien	1			31	VR (CSB Sotema)	Cultivateur	Ambalakida	Taxi	2011-07-04	1899-12-31 10:30:00	2011-07-04	1899-12-31 18:00:00	Trauma/AC	Trauma crânien bénin	Intracranial injury	16.4	Trauma crânien bénin	Trauma	Exeat	1							31
RAZAFINDRATSIMBA Augustin	1			24	AR	Vendeur	Tsararano	Taxi	2011-07-04	1899-12-31 21:00:00	2011-07-05	1899-12-31 12:00:00	TS/15cp de nivaquine	IMV/15cp de nivaquine	Poisoning by other medications and drugs	16.11.2	Toxicologie	Intoxication	Exeat	1							24
ANJARASOA Walid			1	5	AR	?	Mahabibokely	Taxi	2011-07-06	1899-12-31 16:40:00	2011-07-06	1899-12-31 17:30:00	Plaie sourcilière gauche/AD	Plaie sourcilière gauche/AD	Open wounds of head; neck; and trunk	16.6.1	Trauma facial	Trauma	Exeat	1									5
RAZAKA Mady	1			45	AR	,	Tsaramandroso	Taxi	2011-07-06	1899-12-31 22:00:00	2011-07-07	1899-12-31 16:00:00	Trauma crânien/ARC	Plaie pariétale gauche et de l'arcade sourcilière	Open wounds of head; neck; and trunk	16.6.1	Trauma crânio-facial	Trauma	Exeat	1							45
RAZAFINDRAMANGA Pélagie		1		34	AR	Contr$oleur agriculture	Bord de la mer	Taxi	2011-07-08	1899-12-31 17:50:00	2011-07-08	1899-12-31 19:50:00	Douleur abdominale	Intolérance alimentaire	intestinal infection	9.1	Pathologie digestive	Gastrointestinal	Exeat	1								34
RAZAFINDRAVONY Léandra	1			21	AR	Etudiant	Cité Dramsy	Taxi	2011-07-10	1899-12-31 14:15:00	2011-07-10	1899-12-31 15:30:00	Trauma crânien /AC	Plaie et ecchymose de la paupière supérieure gauche	Open wounds of head; neck; and trunk	16.6.1	Trauma crânio-facial	Trauma	Exeat	1							21
RANDRIANIAINA Dénérie Emile	1			20	AR	Etudiant	Ambalavola	Taxi	2011-07-11	1899-12-31 19:50:00	2011-07-12	1899-12-31 14:15:00	Trauma/ARC	Trauma crânio-facial bénin	Intracranial injury	16.4	Trauma crânio-facial	Trauma	Exeat	1							20
RAHARISON Bien Aimé	1			39	VR (CSB Sotema)	?	Ambondrona	Taxi	2011-07-13	1899-12-31 23:00:00	2011-07-14	1899-12-31 01:00:00	Trauma/AC	Trauma crânien bénin	Intracranial injury	16.4	Trauma crânien bénin	Trauma	Exeat	1							39
RANDRIAMAMONJY Tsara Nathalie			1	10	AR	Ecolier	Betamanga	Taxi	2011-07-13	1899-12-31 16:30:00	2011-07-14	1899-12-31 07:50:00	Trauma/AC	Simple plaie du menton	Superficial injury; contusion	16.8	Simple plaie	Trauma	Exeat	1									10
RASOARIMALALA Rondro		1		39	VRP (OSIEM)	?	Mahavoky	Taxi	2011-07-13	1899-12-31 23:55:00	2011-07-14	1899-12-31 08:50:00	Dyspnée + agitation	Dystonie neuro-végétative	Somatoform disorders	5.15.7	Pathologie neuro-psy	Neurologic	Exeat	1								39
RABEARINORO Tatamo		1		17	AR	Coiffeuse	Tsaramandroso	Taxi	2011-07-14	1899-12-31 16:25:00	2011-07-15	1899-12-31 07:00:00	Trauma/AC	Trauma crânien bénin+multiples écorchures	Intracranial injury	16.4	Trauma crânien bénin	Trauma	Exeat	1								17
NIRINA Angèle		1		28	VRP (Osiem)	Ménagère	Amborovy	Taxi	2011-07-15	1899-12-31 13:20:00	2011-07-15	1899-12-31 18:00:00	Trauma crânien + perte de connaissance	Trauma crânien bénin	Intracranial injury	16.4	Trauma crânien bénin	Trauma	Exeat	1								28
ROBISON Vonjisoa	1			26	VRP (SMIM)	Charpentier	Amborovy	Taxi	2011-07-15	1899-12-31 10:50:00	2011-07-15	1899-12-31 12:00:00	Plaie de la main droite/AT	Plaie de la main droite	Open wounds of extremities	16.6.2	Trauma de la main	Trauma	Exeat	1							26
BEHAVANA Olga		1		49	VRP (SOS Médecin)	Ménagère	Tanambao Ambalavato	Taxi	2011-07-17	1899-12-31 23:15:00	2011-07-18	1899-12-31 08:30:00	Douleur abdominale aiguë	Subocclusion intestinale d'origine fonctionnelle probable	Other intestinal obstruction	9.6.3.4	Pathologie digestive	Gastrointestinal	Exeat	1								49
NELSON Hugues	1			34	AR	Docker	Tanambao Sotema	Taxi	2011-07-18	1899-12-31 08:00:00	2011-07-18	1899-12-31 16:00:00	Asthénie	Hypoglycémie	Endocrine; nutritional; and metabolic diseases and immunity disorders	3	Pathologie métabolique	Endocrine	Exeat	1							34
ROBINO	1			25	AR	Ecolier	Ambondrona	Taxi	2011-07-18	1899-12-31 11:00:00	2011-07-18	1899-12-31 13:00:00	Trauma de la jambe gauche/AD	Trauma bénin du genou gauche	injury and poisoning	16	Trauma membre inférieur	Trauma	Exeat	1							25
DADA Berthin	1			37	AR	Collecteur	Manga	Taxi	2011-07-18	1899-12-31 17:15:00	2011-07-18	1899-12-31 19:00:00	Trauma/AC	Multiples écorchures	Superficial injury; contusion	16.8	Multiples écorchures	Trauma	Exeat	1							37
FERLINE			1	0.333333	AR		Mahavoky atsimo	Taxi	2011-07-20	1899-12-31 14:20:00	2011-07-20	1899-12-31 14:45:00	Trauma/AC	Simple contusion	Superficial injury; contusion	16.8	Simple contusion	Trauma	Exeat	1									0.333333
SOANAMBININA Giannie		1		17	AR	Femme de ménage	Mahavoky atsimo	Taxi	2011-07-20	1899-12-31 14:20:00	2011-07-20	1899-12-31 14:45:00	Trauma/AC	Ecorchure du genou droit	Superficial injury; contusion	16.8	Trauma membre inférieur	Trauma	Exeat	1								17
ROBINARISON Vony		1		33	VRP (CMC)	Instituteur	Tsaramandroso	Taxi	2011-07-20	1899-12-31 05:30:00	2011-07-20	1899-12-31 09:30:00	HTA+hyperthermie + anémie	Fièvre typhoïde+ hypokaliémie	Other gram negative septicemia	1.1.2.4	Pathologie infectieuse	Infectious Disease	Exeat	1								33
RASOARIMALALA Sylvia		1		19	AR	Ménagère	Tsararano ambony	Taxi	2011-07-20	1899-12-31 20:30:00	2011-07-21	1899-12-31 09:00:00	Crises convulsives + céphalées	Dystonie neuro-végétative	Somatoform disorders	5.15.7	Pathologie neuro-psy	Neurologic	Exeat	1								19
ADENA	1			25	AR	Ouvrier	Ambalavato	Taxi	2011-07-21	1899-12-31 15:30:00	2011-07-22	1899-12-31 10:00:00	TS/raticide	Intoxication/raticide	poisoning by nonmedicinal substances	16.11.3	Toxicologie	Intoxication	Exeat	1							25
JOELSON Mamitiana			1	7	AR	Ecolier	Sotema	Taxi	2011-07-22	1899-12-31 16:41:00	2011-07-22	1899-12-31 18:30:00	Trauma/AC	Multiples écorchures	Superficial injury; contusion	16.8	Multiples écorchures	Trauma	Exeat	1									7
RAKOTONDRAHOVA Sylvia		1		28	AR	Coiffeur	Tsararano	Taxi	2011-07-22	1899-12-31 15:10:00	2011-07-22	1899-12-31 18:00:00	Trauma/AC	Céphalées post-traumatique	Concussion	16.4.1	Simple contusion	Trauma	Exeat	1								28
RAKOTONARIVO Phillipe	1			27	AR	Contrôleur	Androva	Taxi	2011-07-22	1899-12-31 07:21:00	2011-07-23	1899-12-31 08:20:00	Trauma/AC	Multiples écorchures	Superficial injury; contusion	16.8	Multiples écorchures	Trauma	Exeat	1							27
SOLONIAINA Benjamin			1	7	VRP (Méd libre)	Ecolier	Tsararano ambany	Taxi	2011-07-23	1899-12-31 12:30:00	2011-07-13	1899-12-31 13:10:00	Hémorragie post-circoncision	Hémorragie post-circoncision	Hemorrhage or hematoma complicating a procedure	16.10.2.5	Trauma génito-urinaire	Trauma	Exeat	1									7
ANDRIANARY Jean Chrisostome	1			34	AR	Vendeur	Androva	Taxi	2011-07-23	1899-12-31 07:21:00	2011-07-23	1899-12-31 08:15:00	Trauma/AC	Multiples écorchures	Superficial injury; contusion	16.8	Multiples écorchures	Trauma	Exeat	1							34
RAMANGASON Rondro Narindra	1			33	AR	Ménagère	Hotel Roche rouge	Taxi	2011-07-24	1899-12-31 04:30:00	2011-07-26	?	Trauma /AD	Plaie de P1 des 3e et 4e doigts de la main droite	Open wounds of extremities	16.6.2	Trauma de la main	Trauma	Exeat	1							33
MAHAZAKA Feno	1			58	VR (CSB Mahabibo)	Retraité	Fiofio	Taxi	2011-07-25	1899-12-31 13:05:00	2011-07-25	1899-12-31 04:30:00	Coma éthylique	Hypoglycémie avec coma éthylique	Alcohol-related disorders	5.11	Toxicologie	Intoxication	Exeat	1							58
RAKOTOSON Elie Ezekiel	1			17	VR (CSB Mahabibo)	Etudiant	Tanambao Ambalavato	Taxi	2011-07-26	1899-12-31 21:30:00	2011-07-26	1899-12-31 22:15:00	Trauma crânien /AC	Hématome frontal et écorchure du genou gauche/AC	Superficial injury; contusion	16.8	Simple écorchure	Trauma	Exeat	1							17
NOMENJANAHARY Onjaniaina	1			18	AR	Vendeur	Antanimasaja	Taxi	2011-07-26	1899-12-31 00:59:00	2011-07-26	1899-12-31 01:30:00	Trauma/AC	Plaie de la joue gauche	Open wounds of extremities	16.6.2	Trauma facial	Trauma	Exeat	1							18
[truncated: 2,516 more rows]

## Sheet: 2012
NOM et PRENOMS	M	F	?	Age	REFERENCE	Profession	Domicile	Transport	D.E	H entrée	D.S	H sortie	DIAGNOSTIC D'ENTREE	DIAGNOSTIC DE SORTIE	CCS Category	CCS Code	CLASSIFICATION	VKClass	Evolution	Exeat	Transfert	Décharge	Evadé	Déces	CED	Evasan	MedianAgeM	MedianAgeF	MedianAge?
[truncated: 2,065 more rows]

[truncated: 2 more sheets: OldAnalysis, NPB Codes]
